# Supplementary material for: 1,5-(H, RO, RS) shift/6π-electrocyclic ring closure tandem processes on N-[(α-heterosubstituted)-2-tolyl]ketenimines: a case study of relative migratory aptitudes and activating effects
Source: Royal Society of Chemistry journal article supplement (doi:10.1039/c2ob27010b), 2012-01-01

**1,5-(H, RO, RS) shift/ $6\pi$ -electrocyclic ring closure tandem processes on *N*-[( $\alpha$ -heterosubstituted)-2-tolyl]ketenimines: a case study of relative migratory aptitudes and activating effects**

**Mateo Alajarin,\*<sup>a</sup> Baltasar Bonillo,<sup>a</sup> Raúl-Angel Orenes,<sup>b</sup> Maria-Mar Ortin,<sup>a</sup> and Angel Vidal\*<sup>a</sup>**

*<sup>a</sup> Departamento de Química Orgánica, Universidad de Murcia, Facultad de Química, Regional Campus of International Excellence “Campus Mare Nostrum”, Espinardo, 30100 Murcia, Spain*

*<sup>b</sup> Servicio Universitario de Instrumentación Científica, Universidad de Murcia, Campus de Espinardo, 30100 Murcia, Spain*

**Table of Contents**

|                                                                                                                                                                                                                                                                                                                                      |         |
|--------------------------------------------------------------------------------------------------------------------------------------------------------------------------------------------------------------------------------------------------------------------------------------------------------------------------------------|---------|
| <b>Figure S1</b> ORTEP representation of the crystal structure of <i>cis</i> - <b>20e</b>                                                                                                                                                                                                                                            | S2      |
| Copy of <sup>1</sup> H and <sup>13</sup> C NMR Spectra of Compounds <b>10</b> , <b>12</b> , <b>13</b> , <b>17</b> , <b>20</b> , <b>21</b> , <b>26</b> , <b>28</b> , <b>31</b> , <b>34</b> , <b>37</b> and <b>39</b> . Copy of <sup>31</sup> P NMR Spectra of Compounds <b>10</b> , <b>17</b> , <b>26</b> , <b>31</b> and <b>37</b> . | S3-S103 |

**Figure S1:** ORTEP representation of the crystal structure of *cis*-**20e**

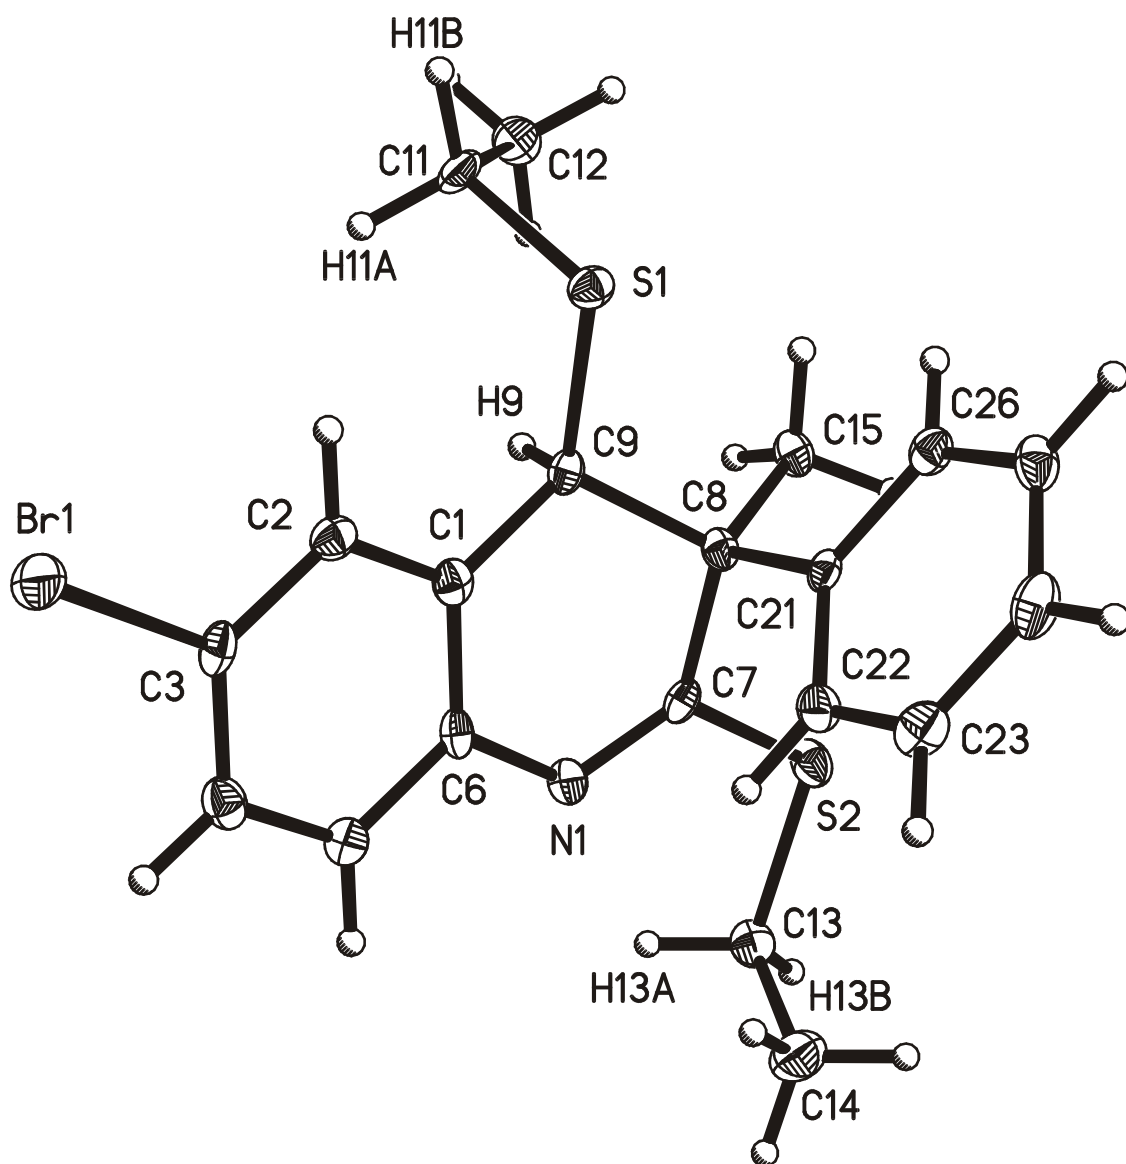

<sup>1</sup>H NMR of **10a**

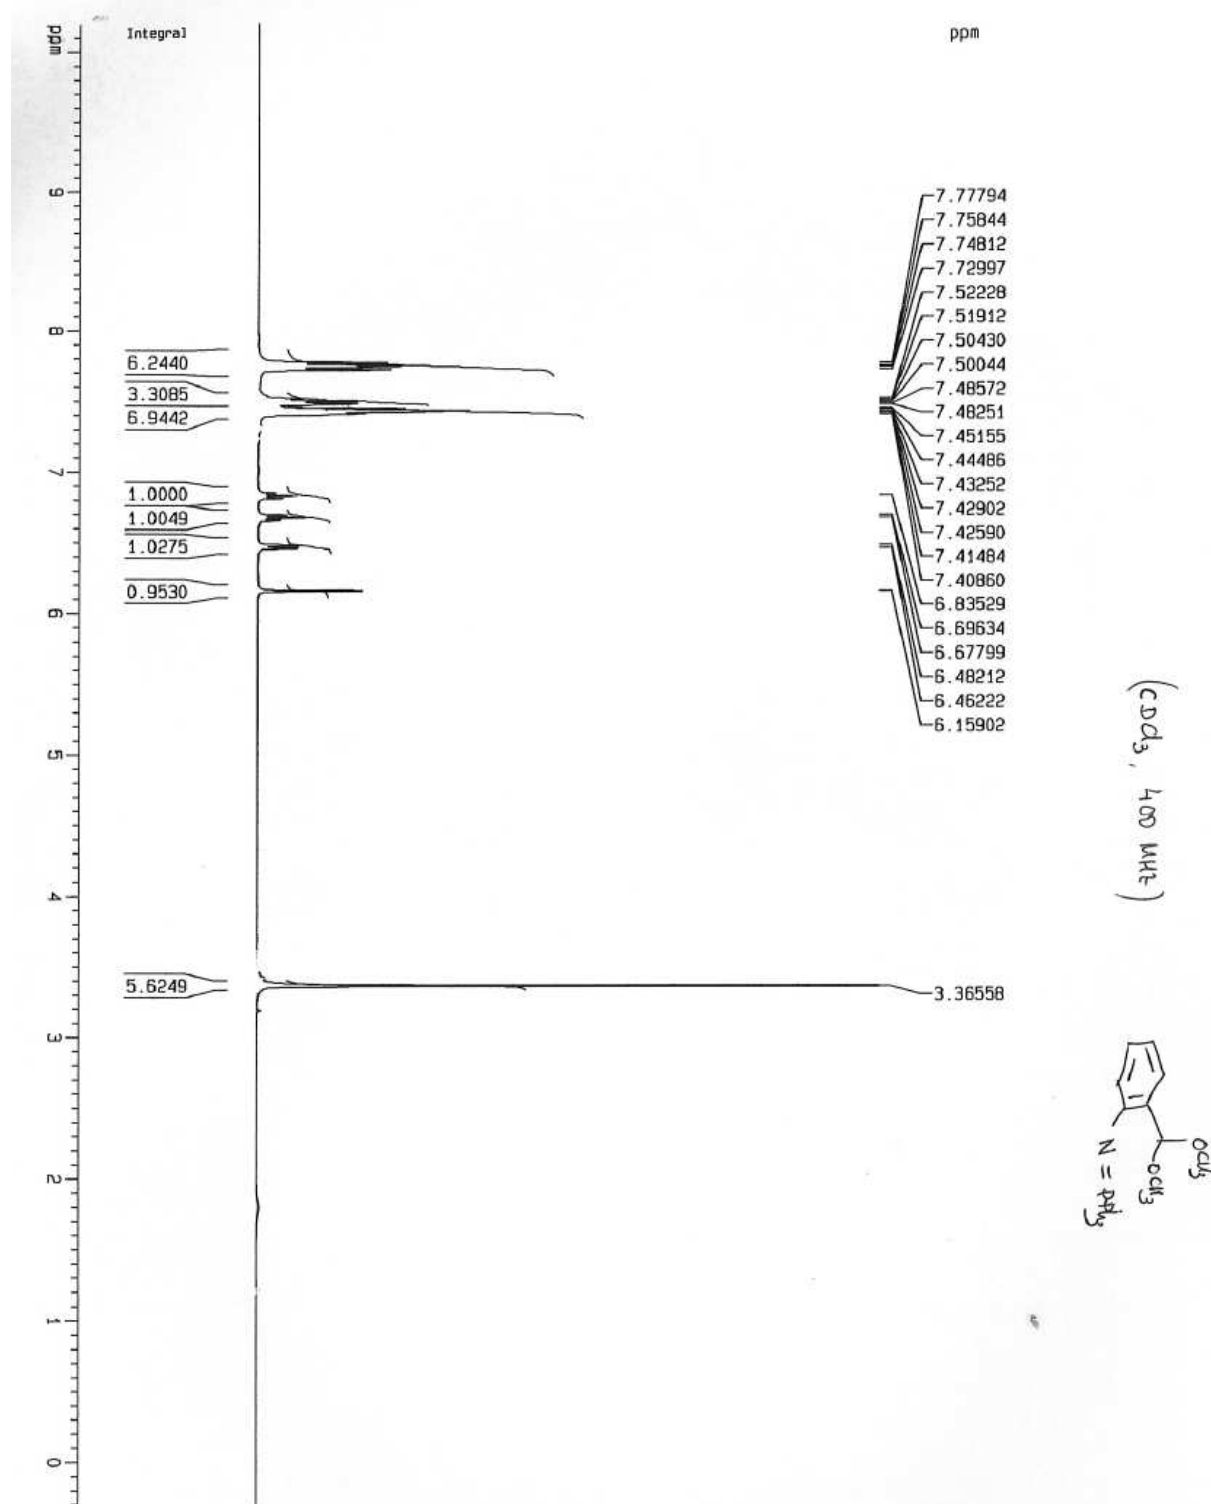

$^{13}\text{C}$  NMR of **10a**

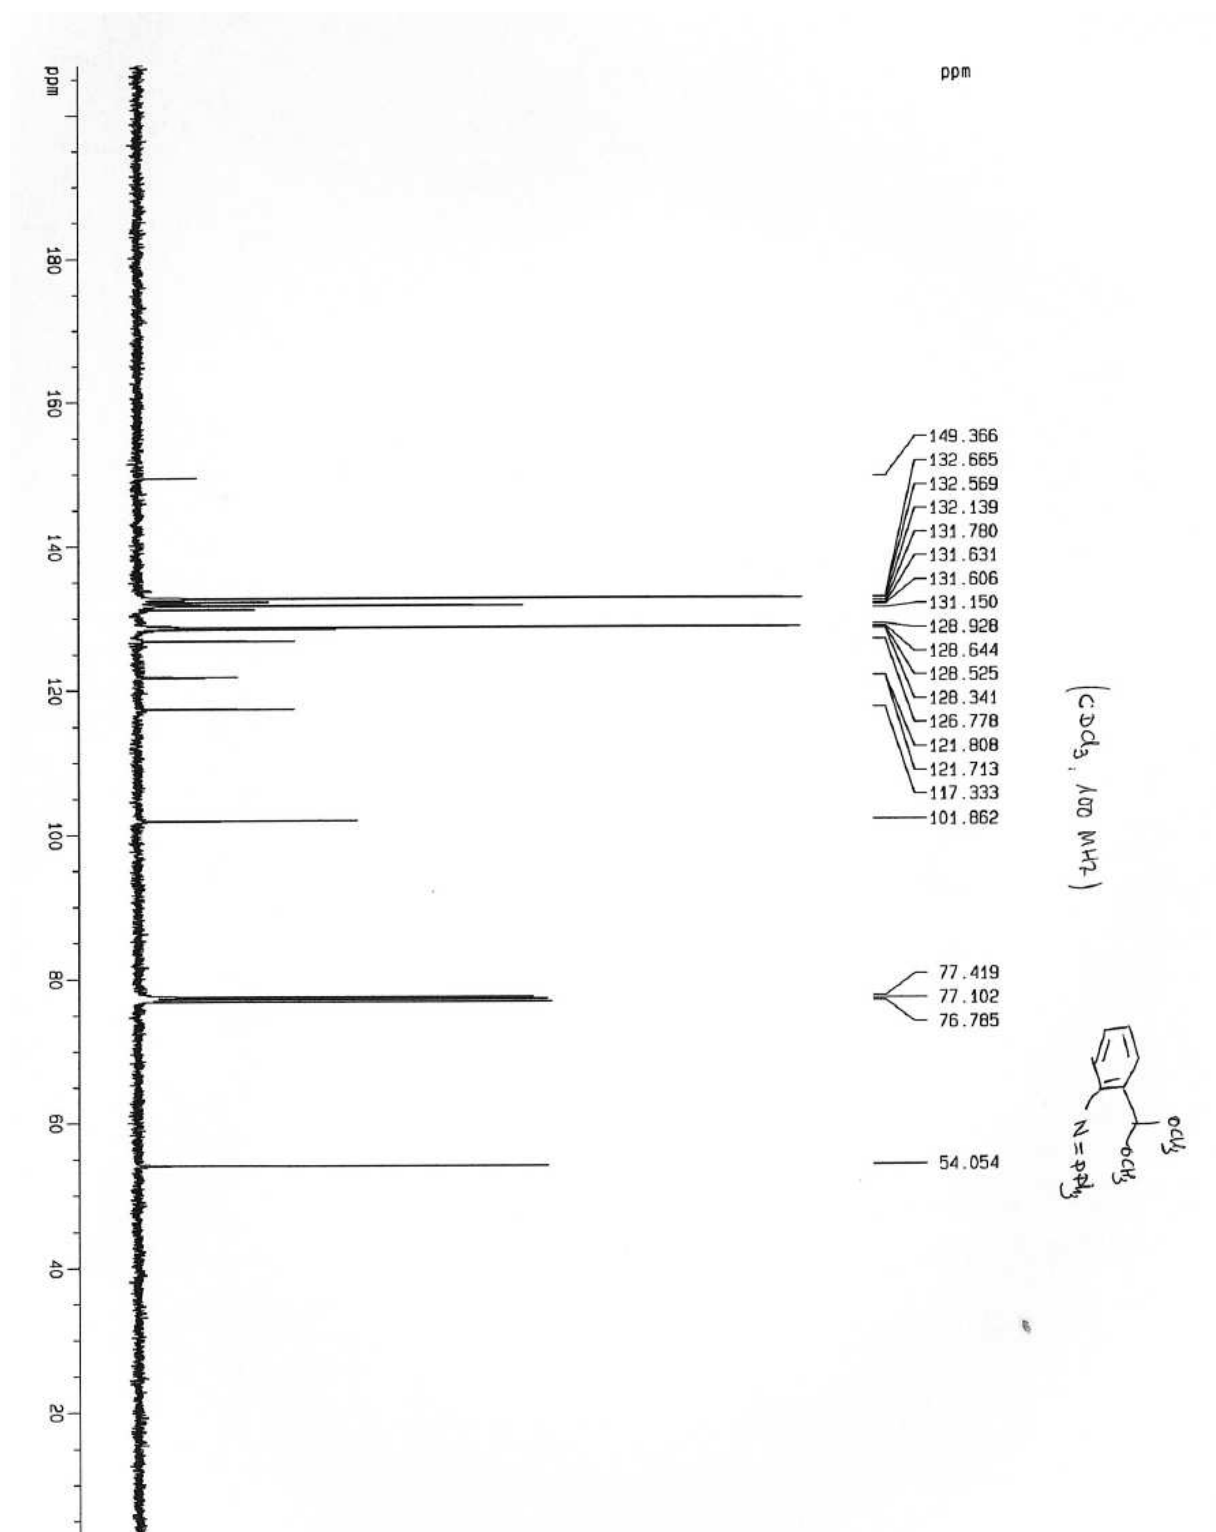

<sup>31</sup>P NMR of **10a**

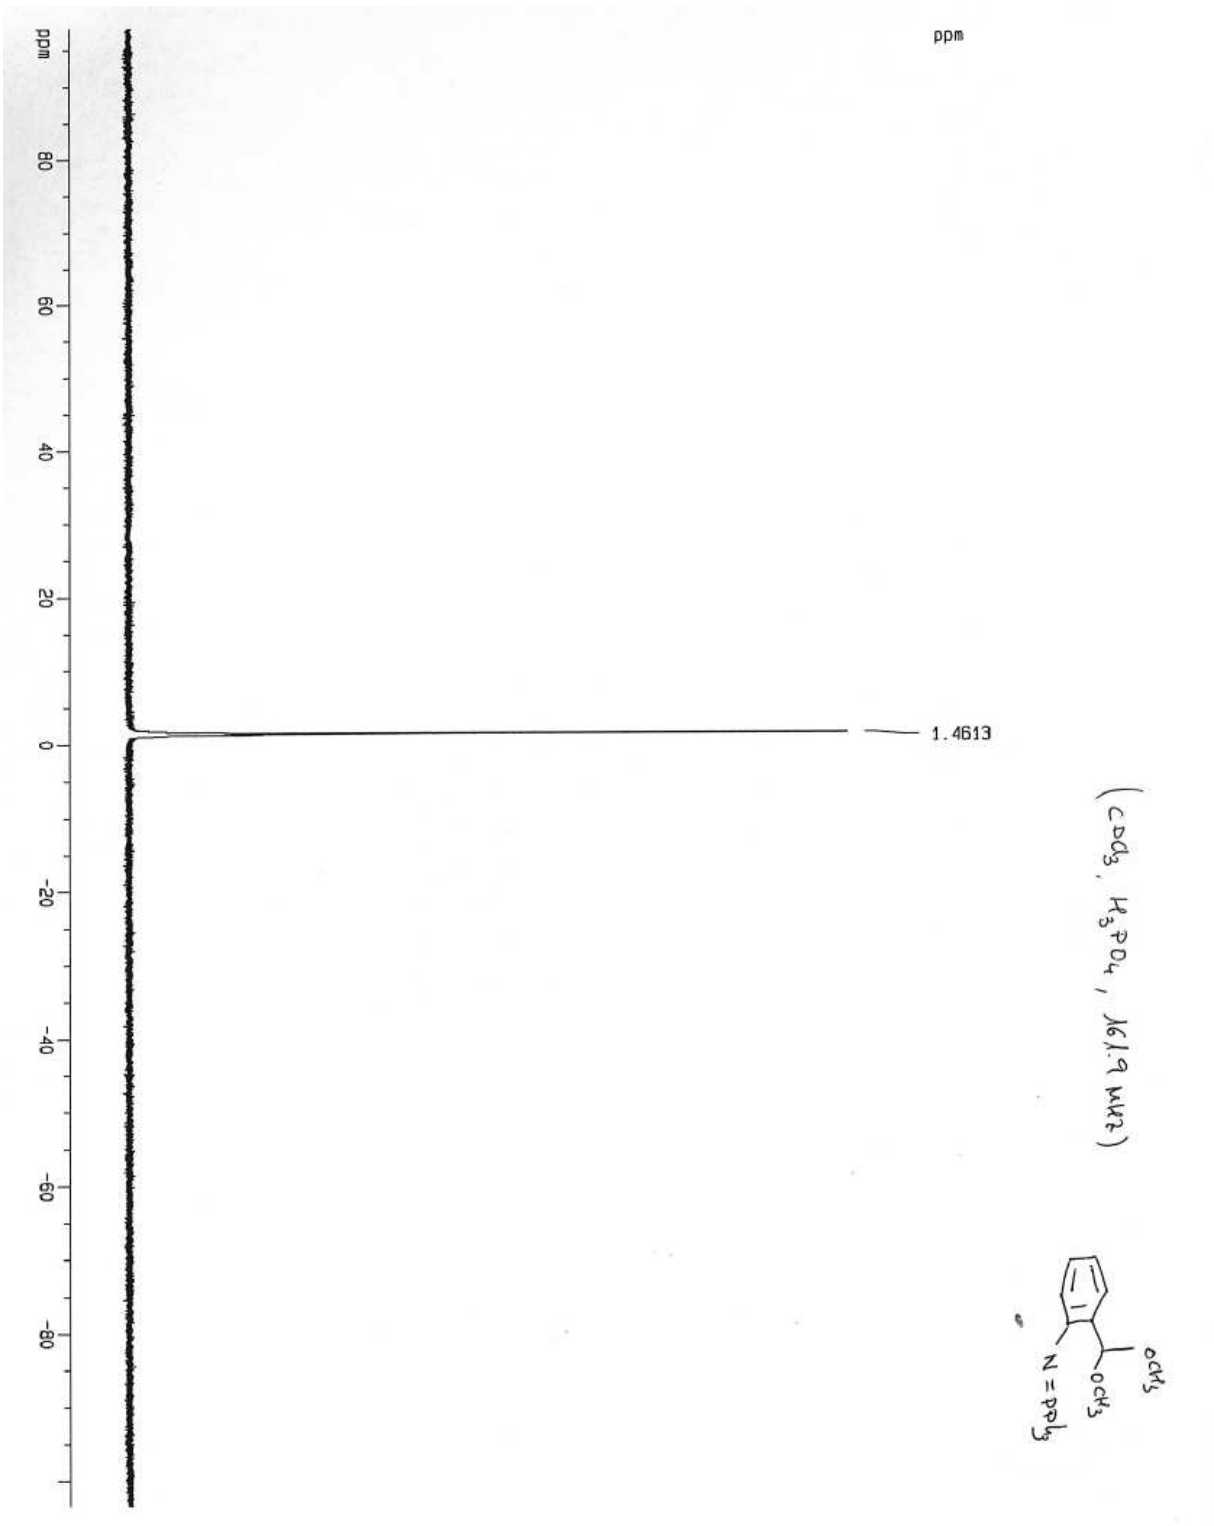

<sup>1</sup>H NMR of **10b**

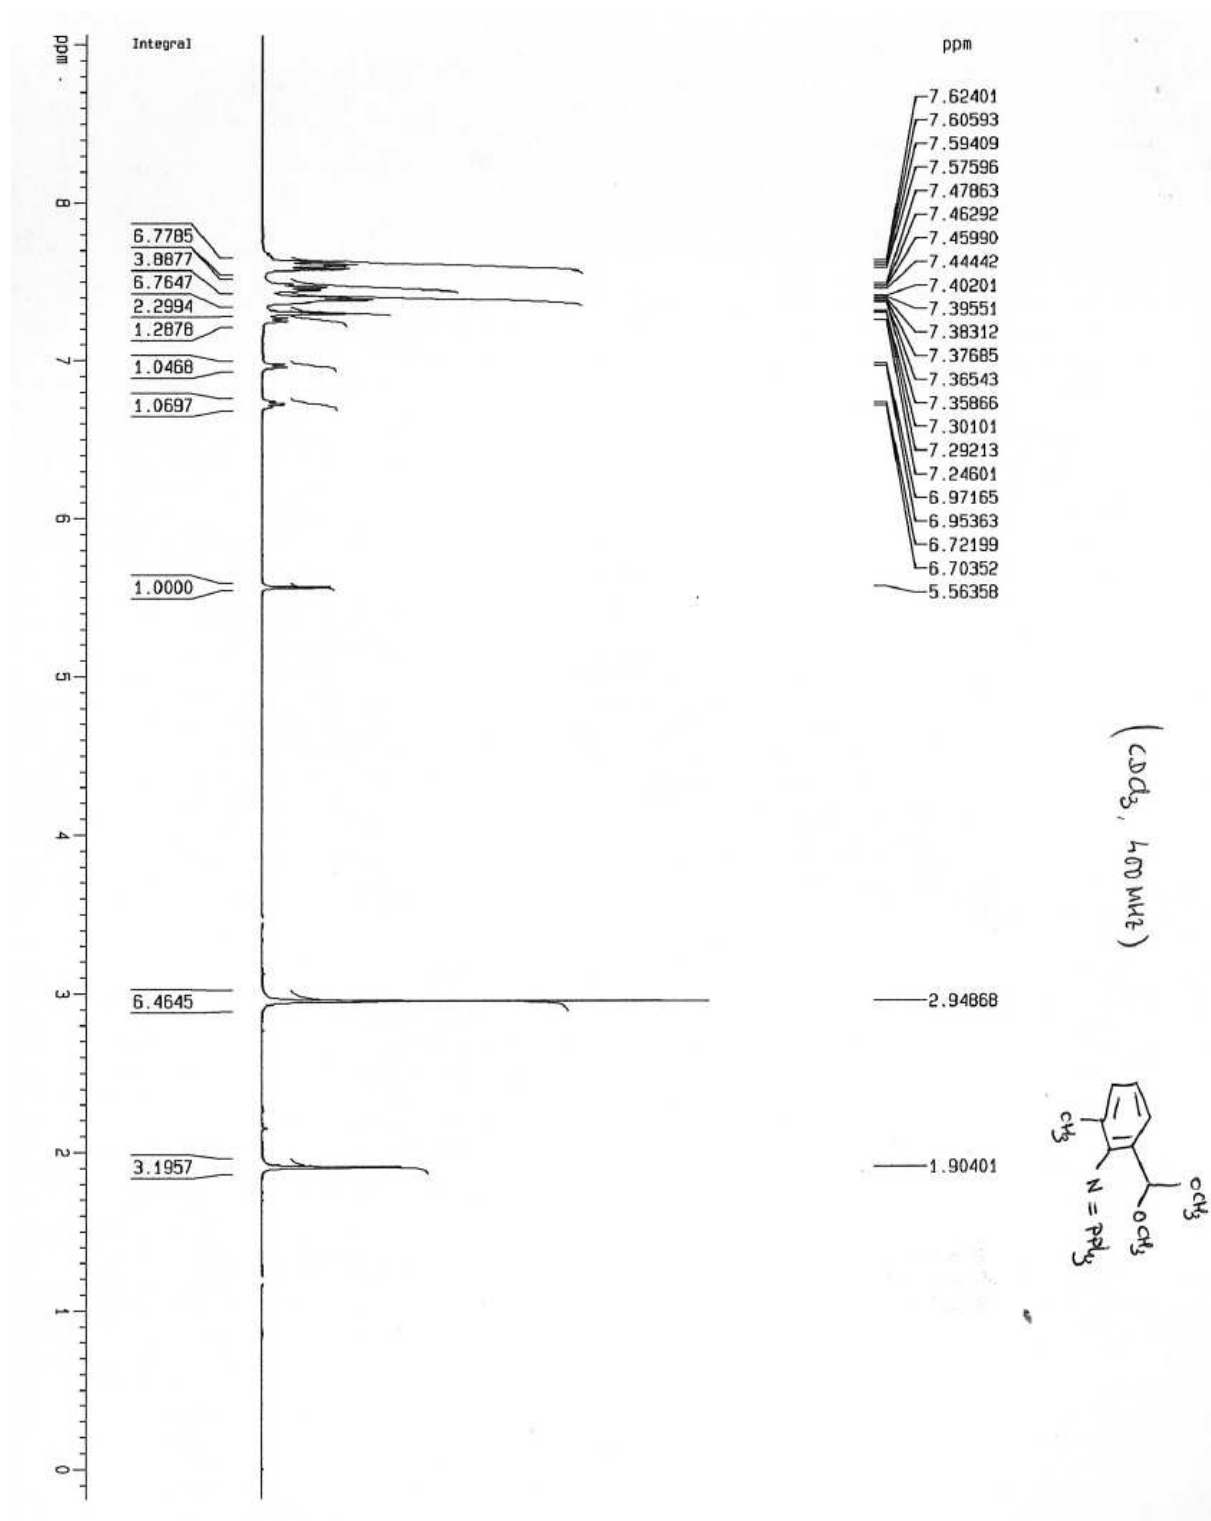

$^{13}\text{C}$  NMR of **10b**

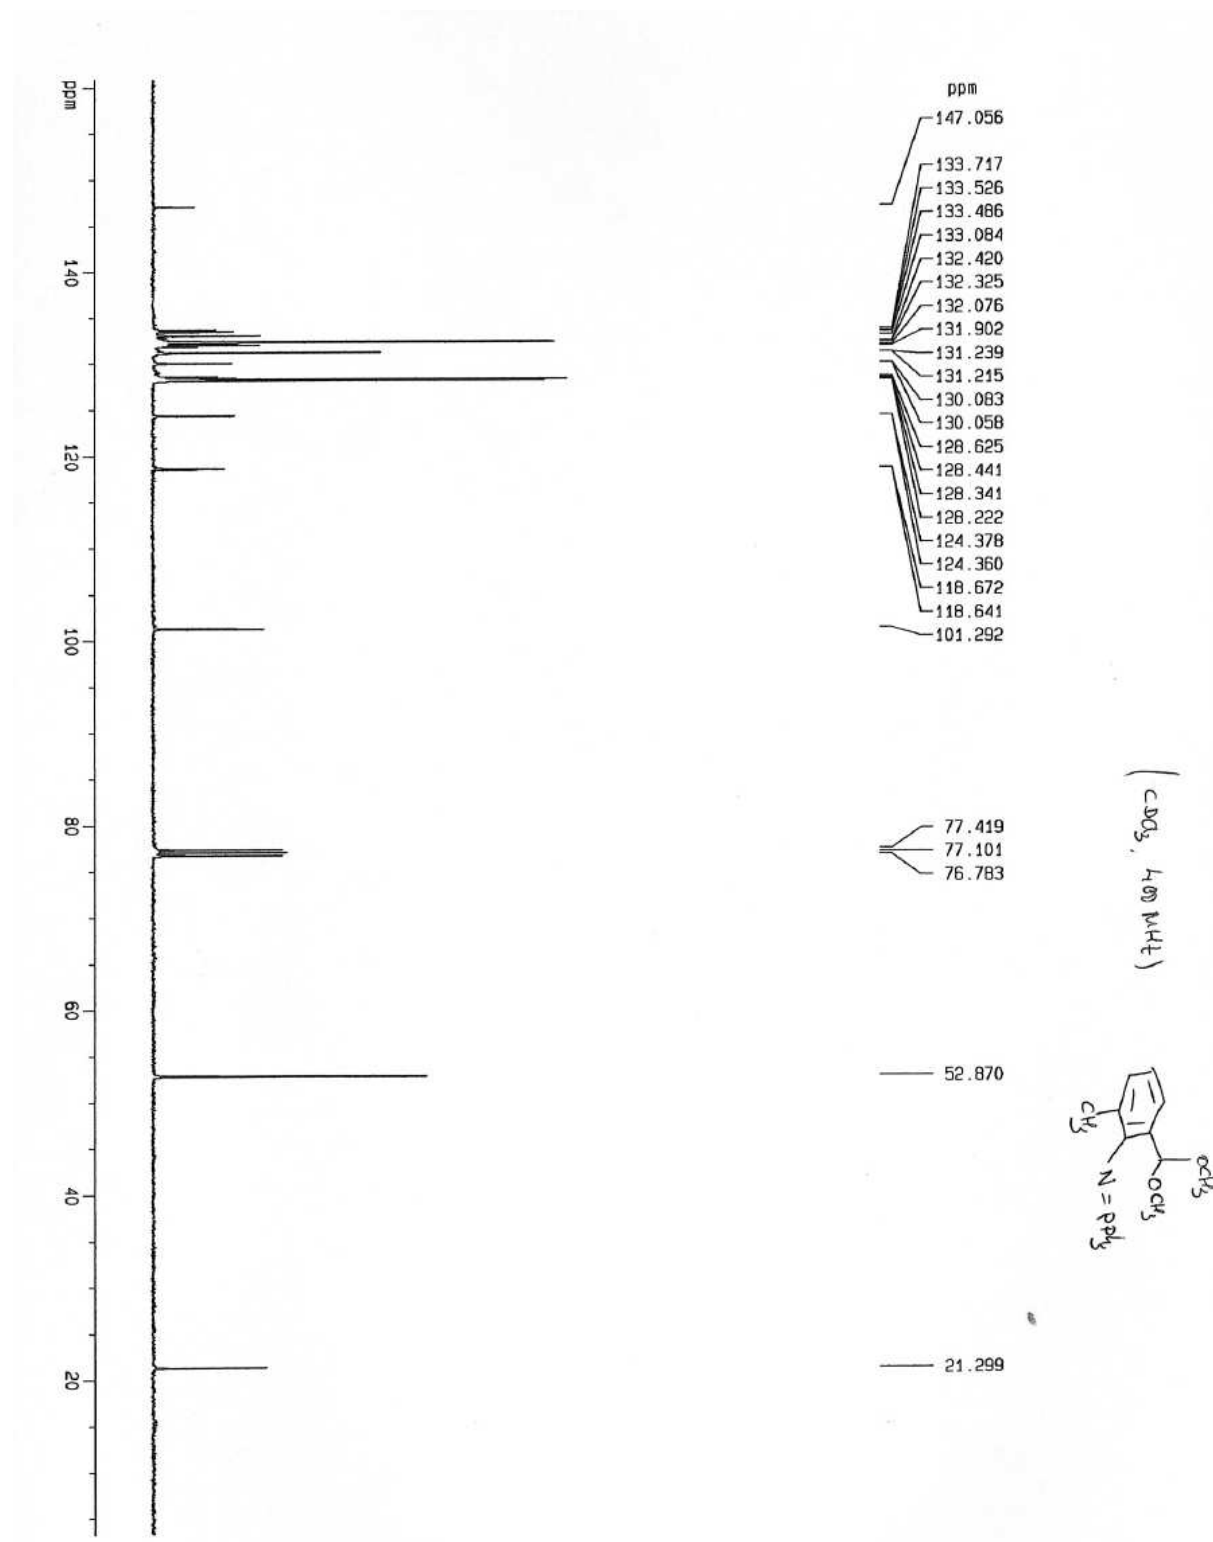

<sup>31</sup>P NMR of **10b**

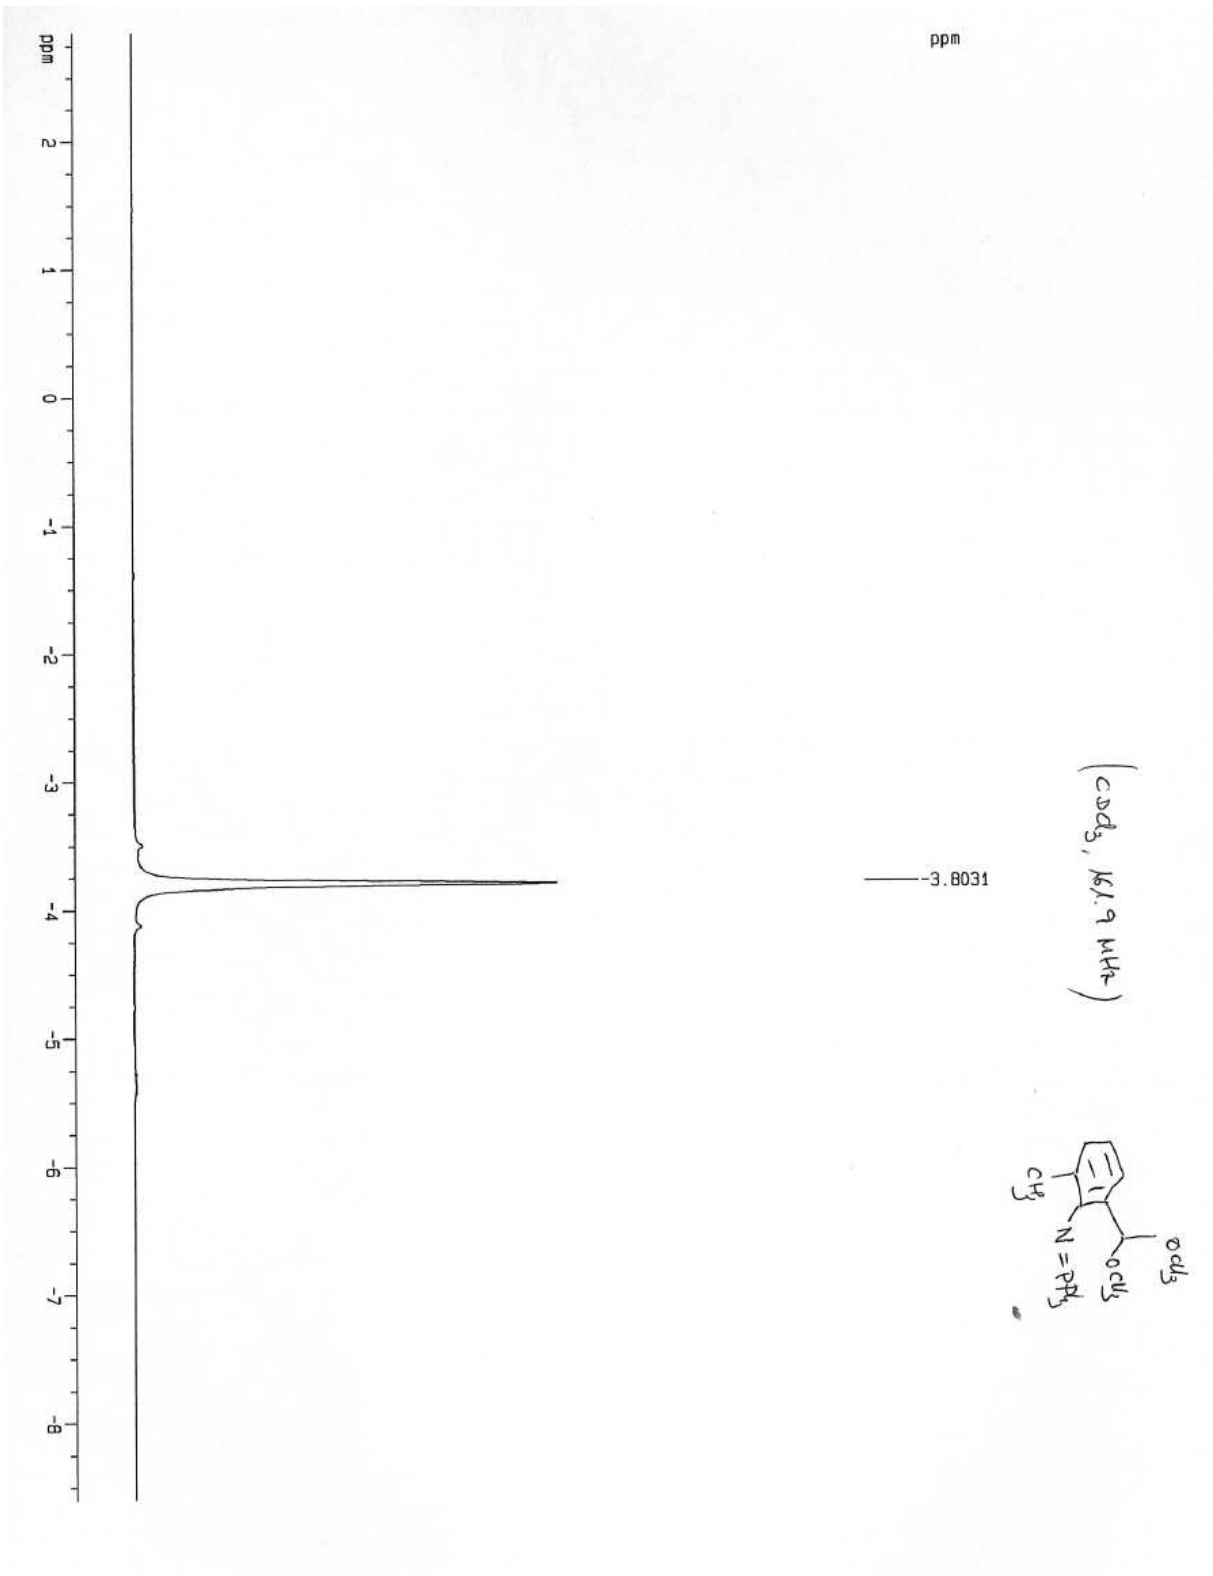



<sup>1</sup>H NMR of **10c**

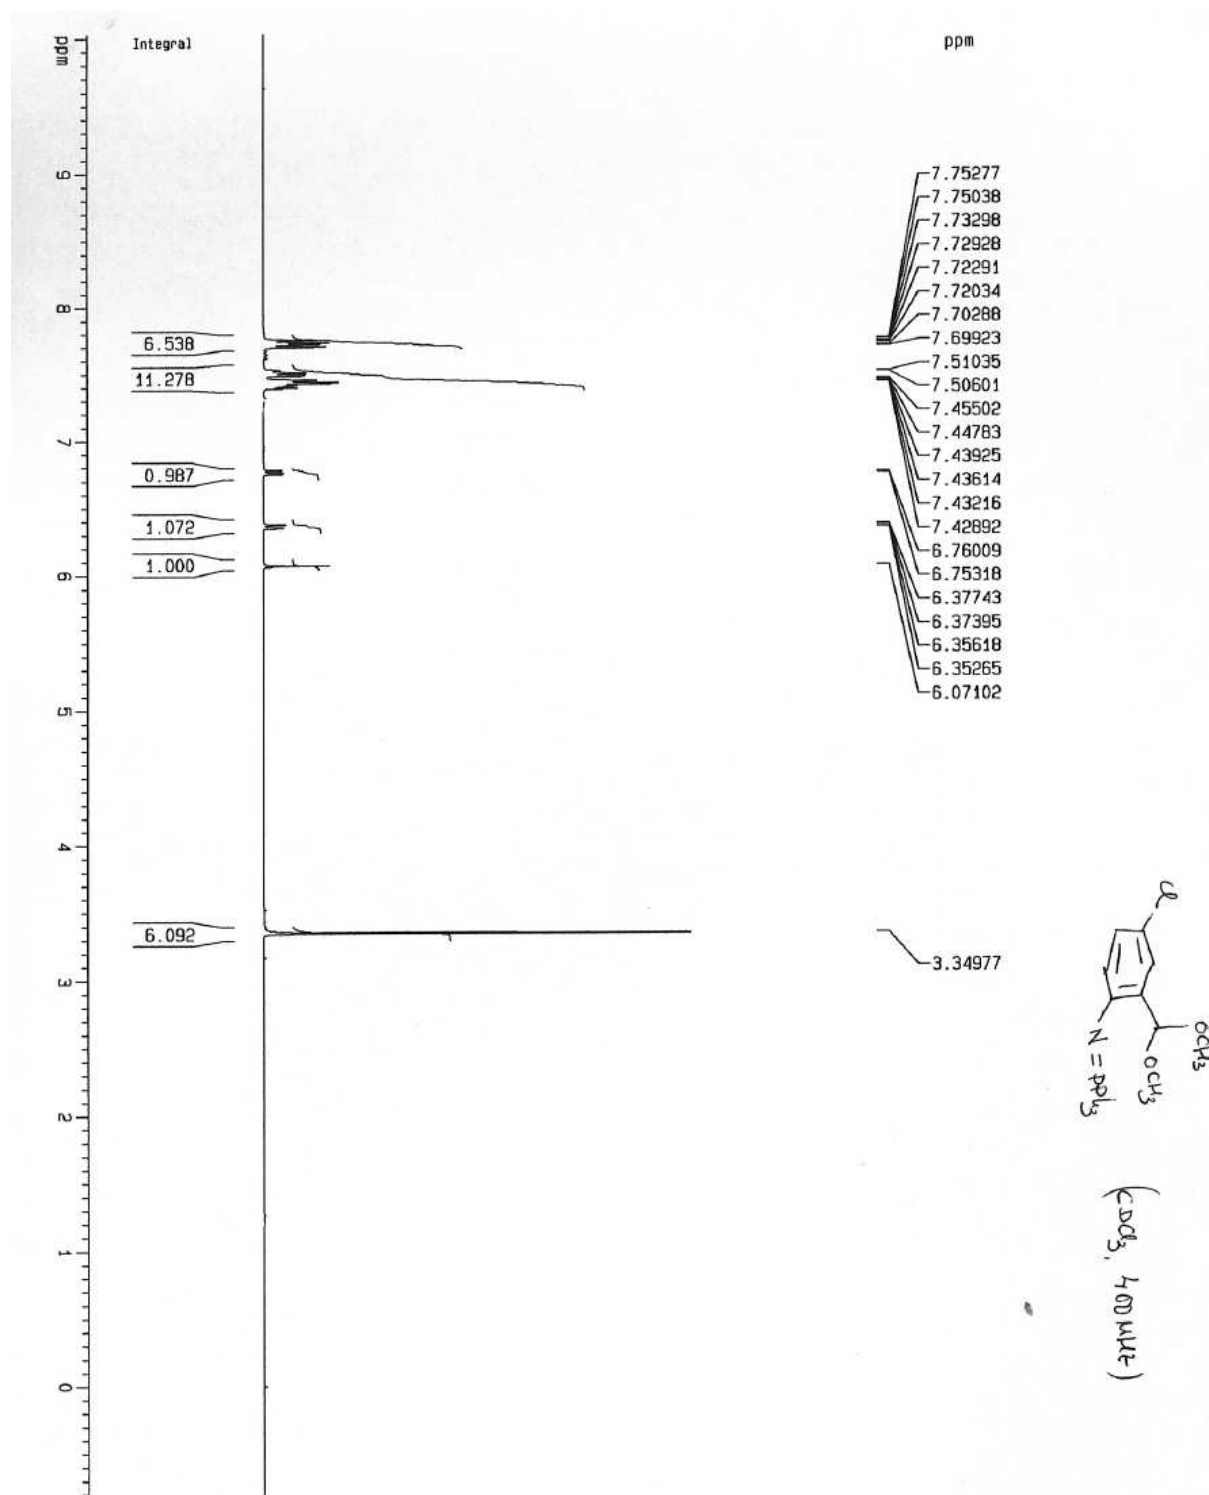

$^{13}\text{C}$  NMR of **10c**

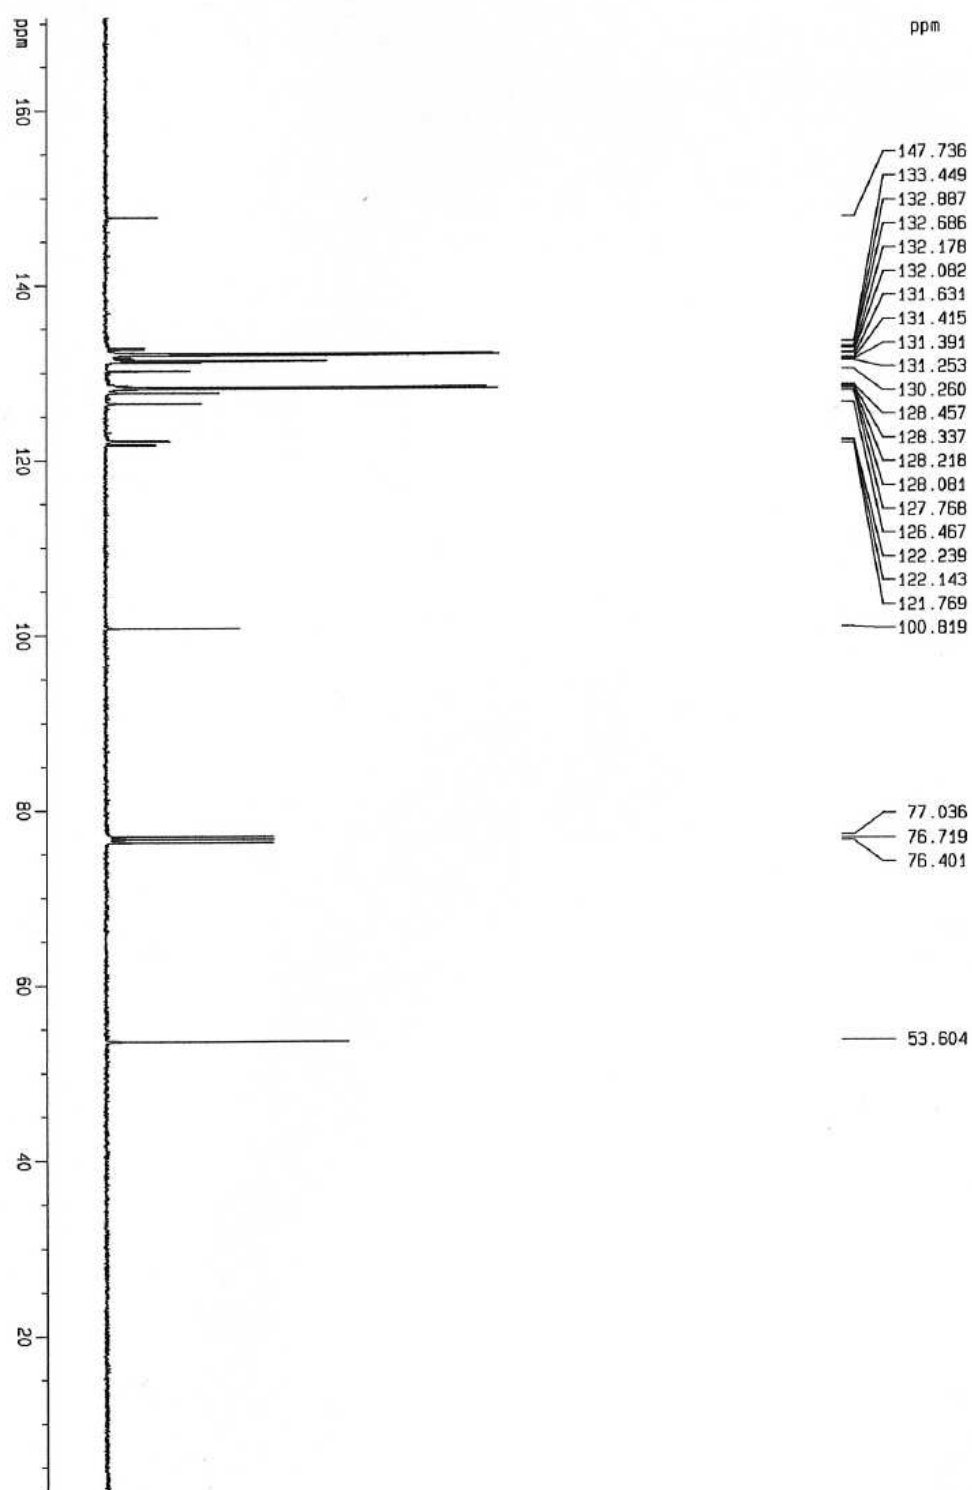

( $\text{CDCl}_3$ , 100 MHz)

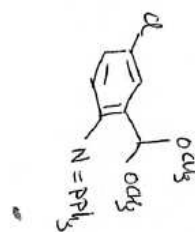

<sup>31</sup>P NMR of **10c**

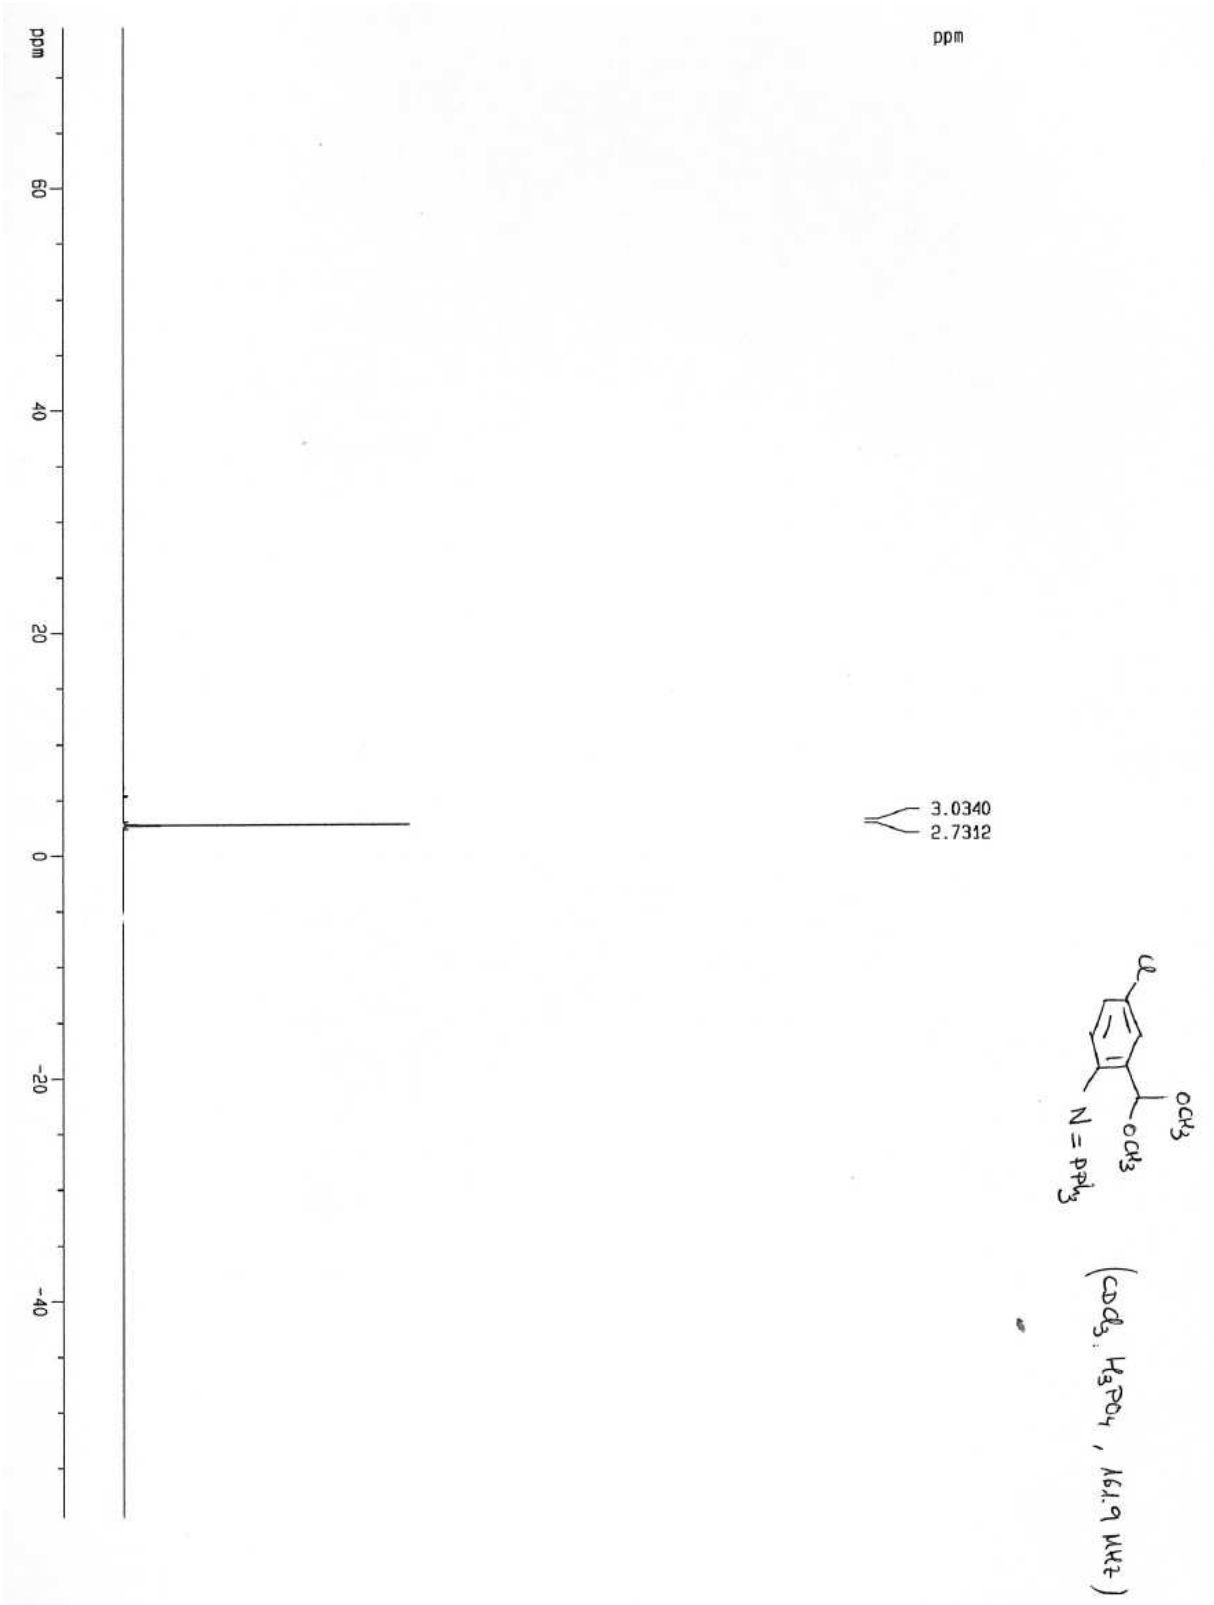



$^{13}\text{C}$  NMR of **10d**

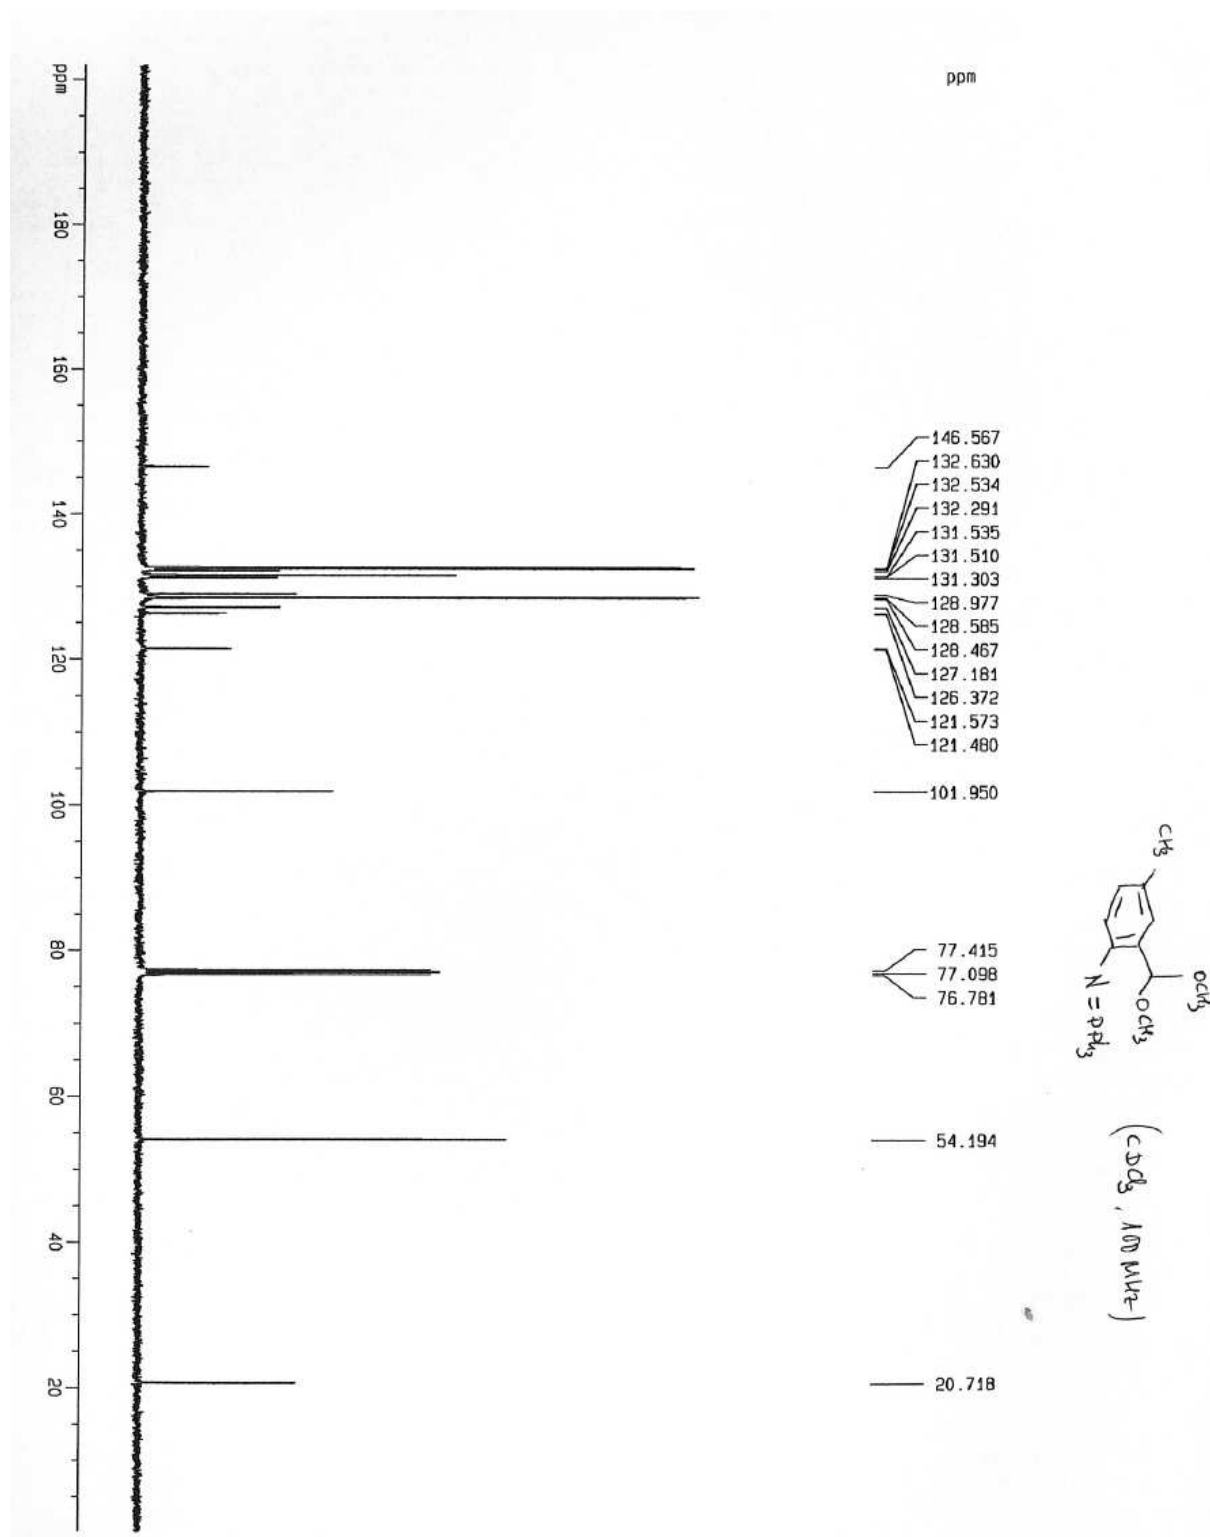

<sup>31</sup>P NMR of **10d**

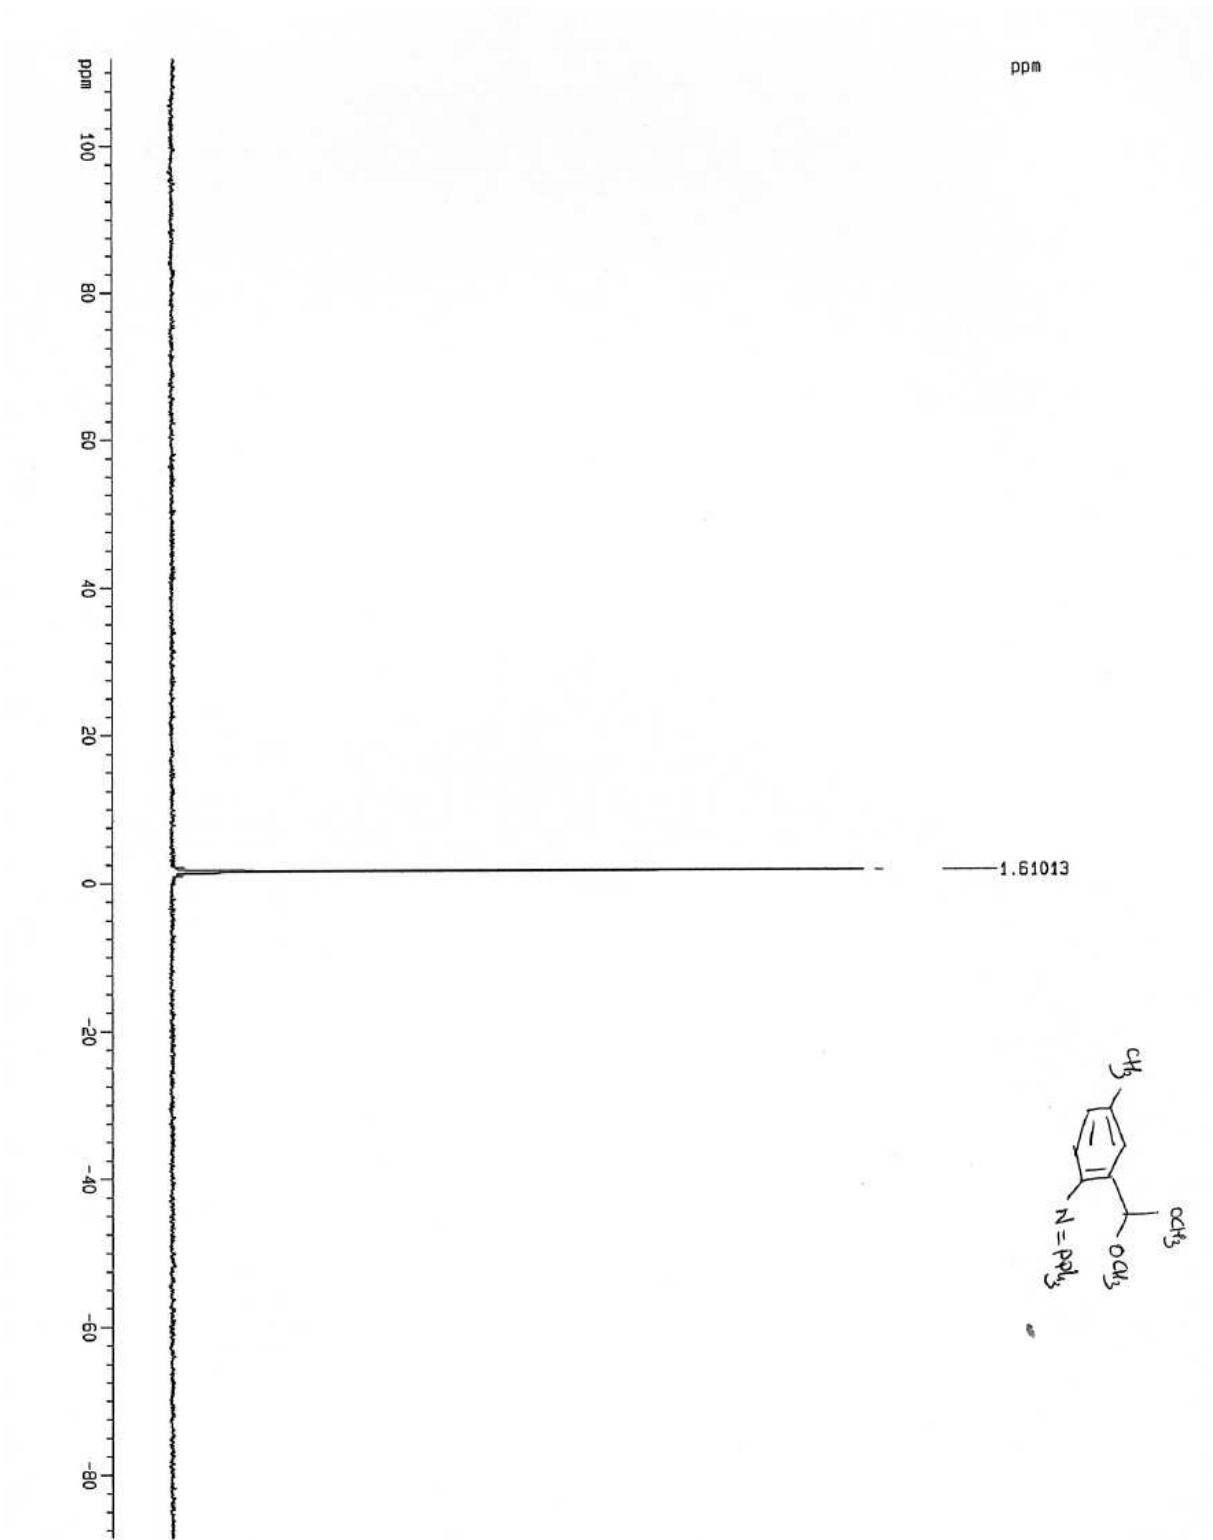

<sup>1</sup>H NMR of **12a**

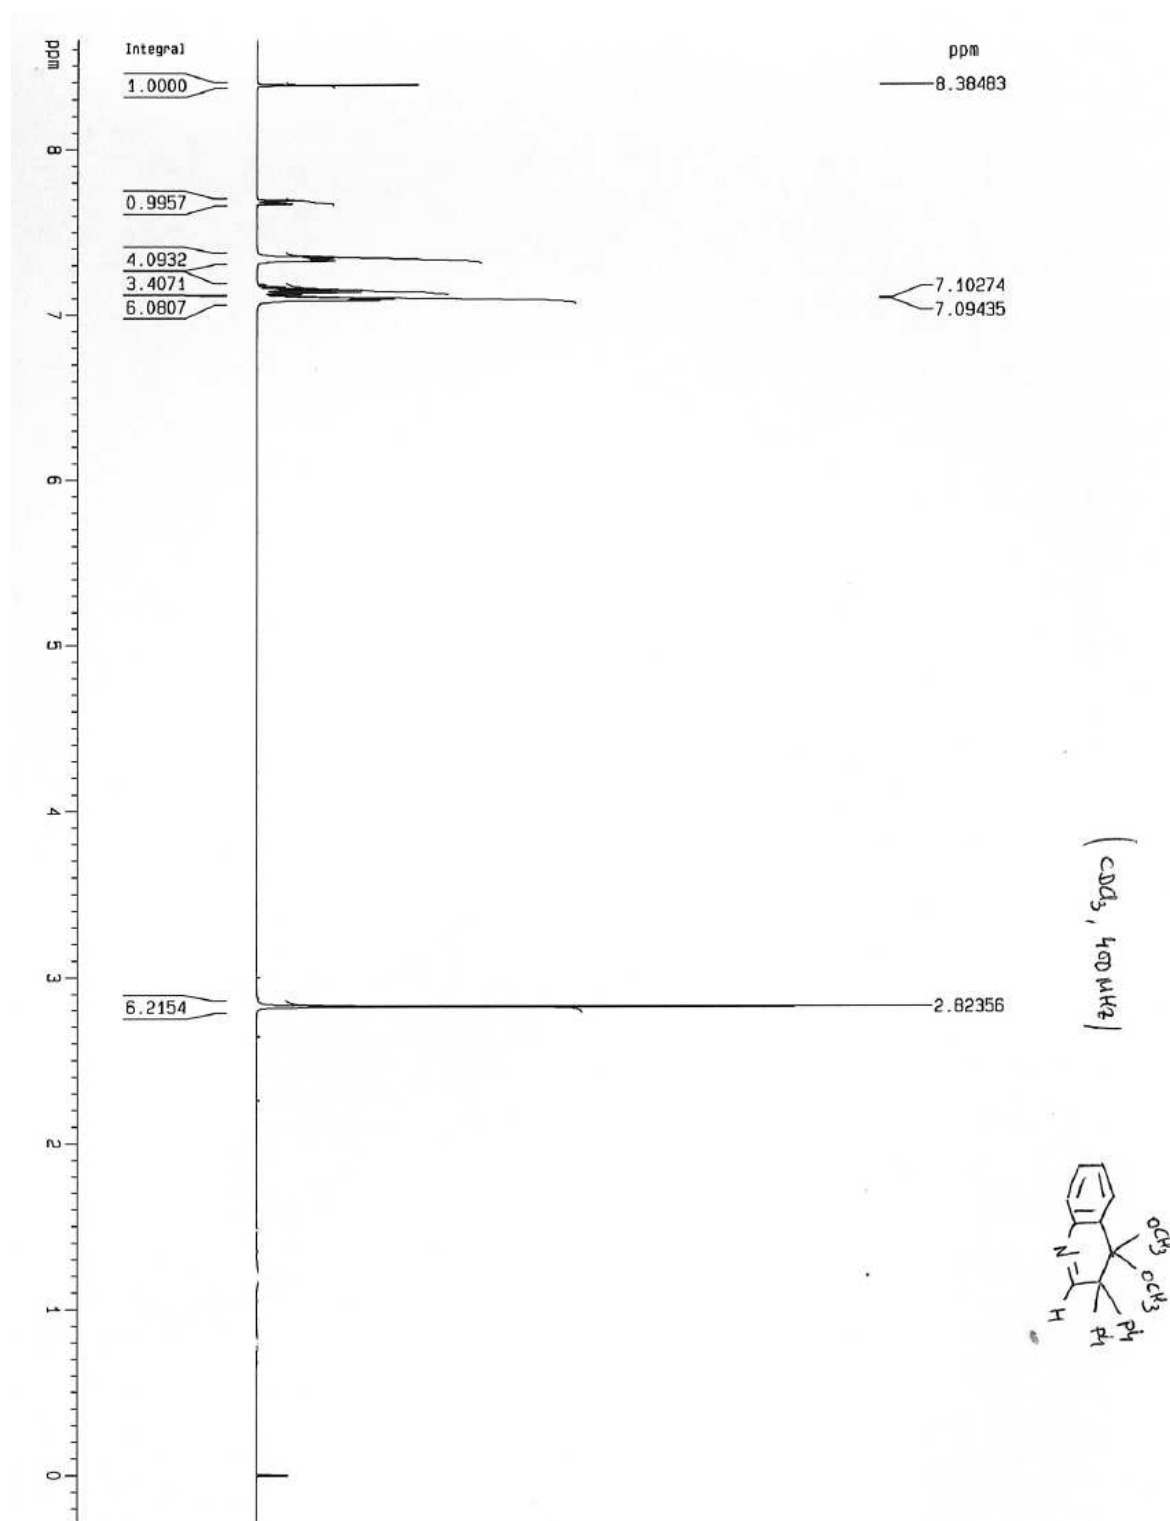

$^{13}\text{C}$  NMR of **12a**

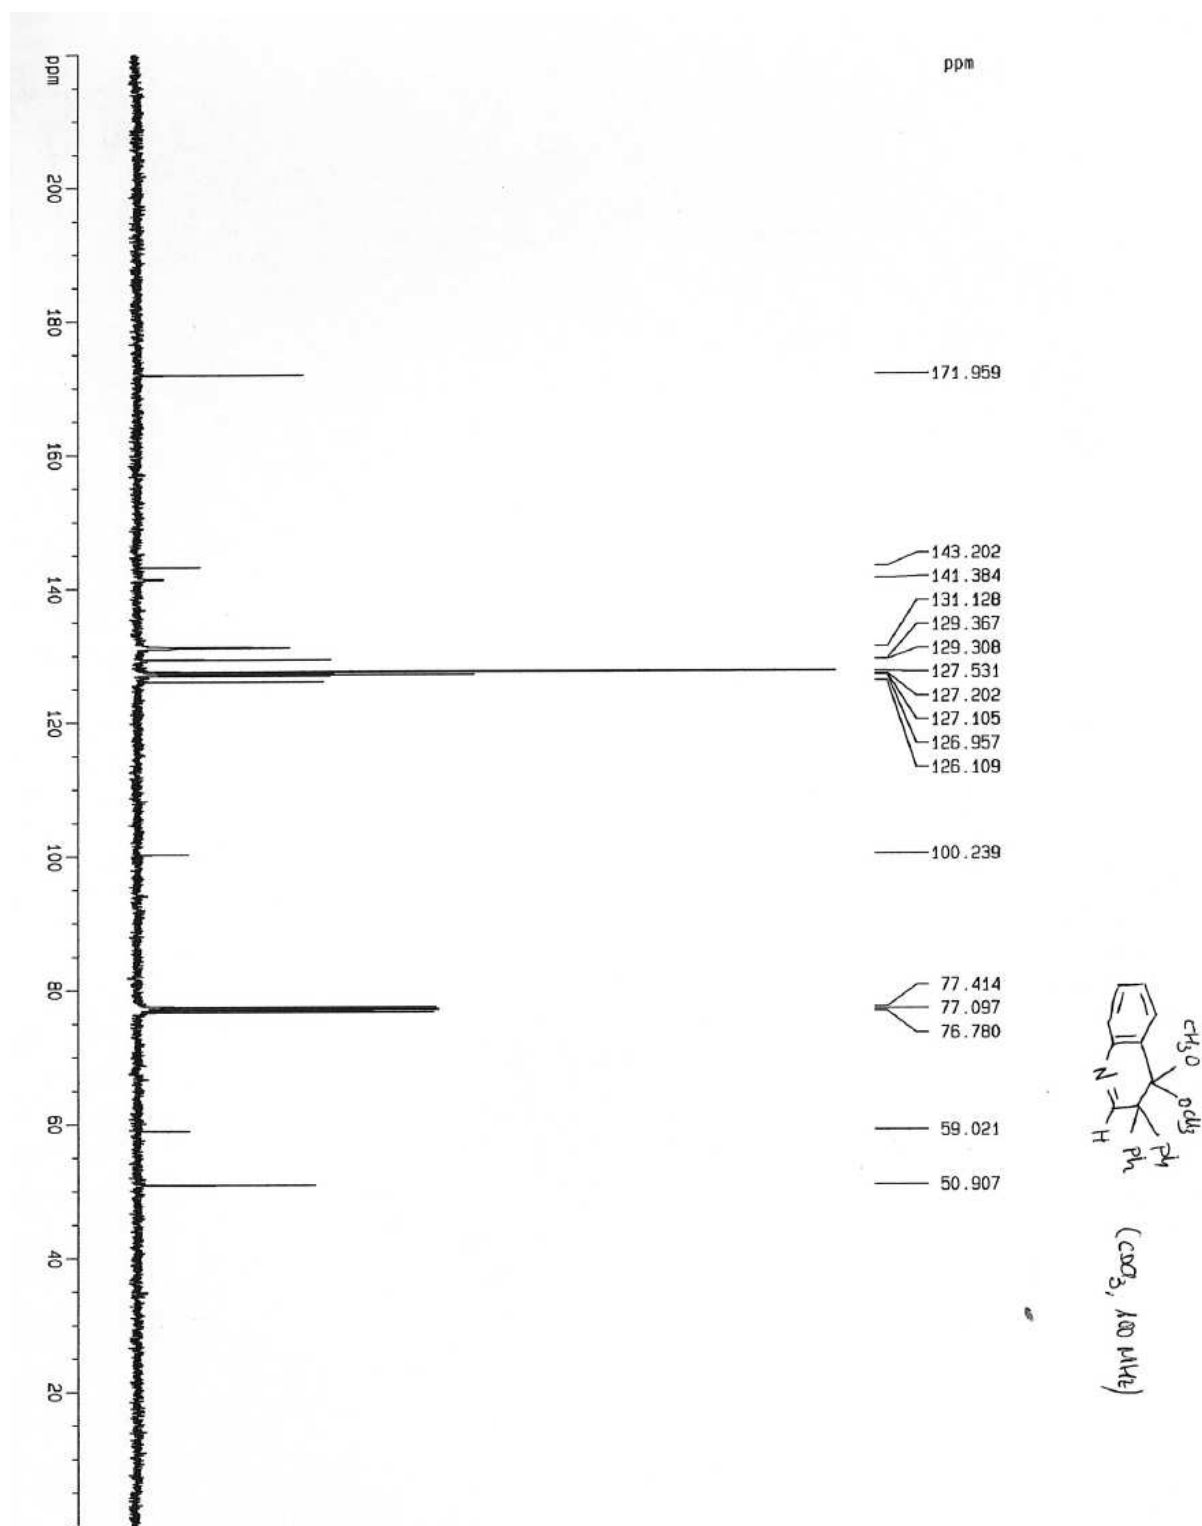



<sup>1</sup>H NMR of **12b**

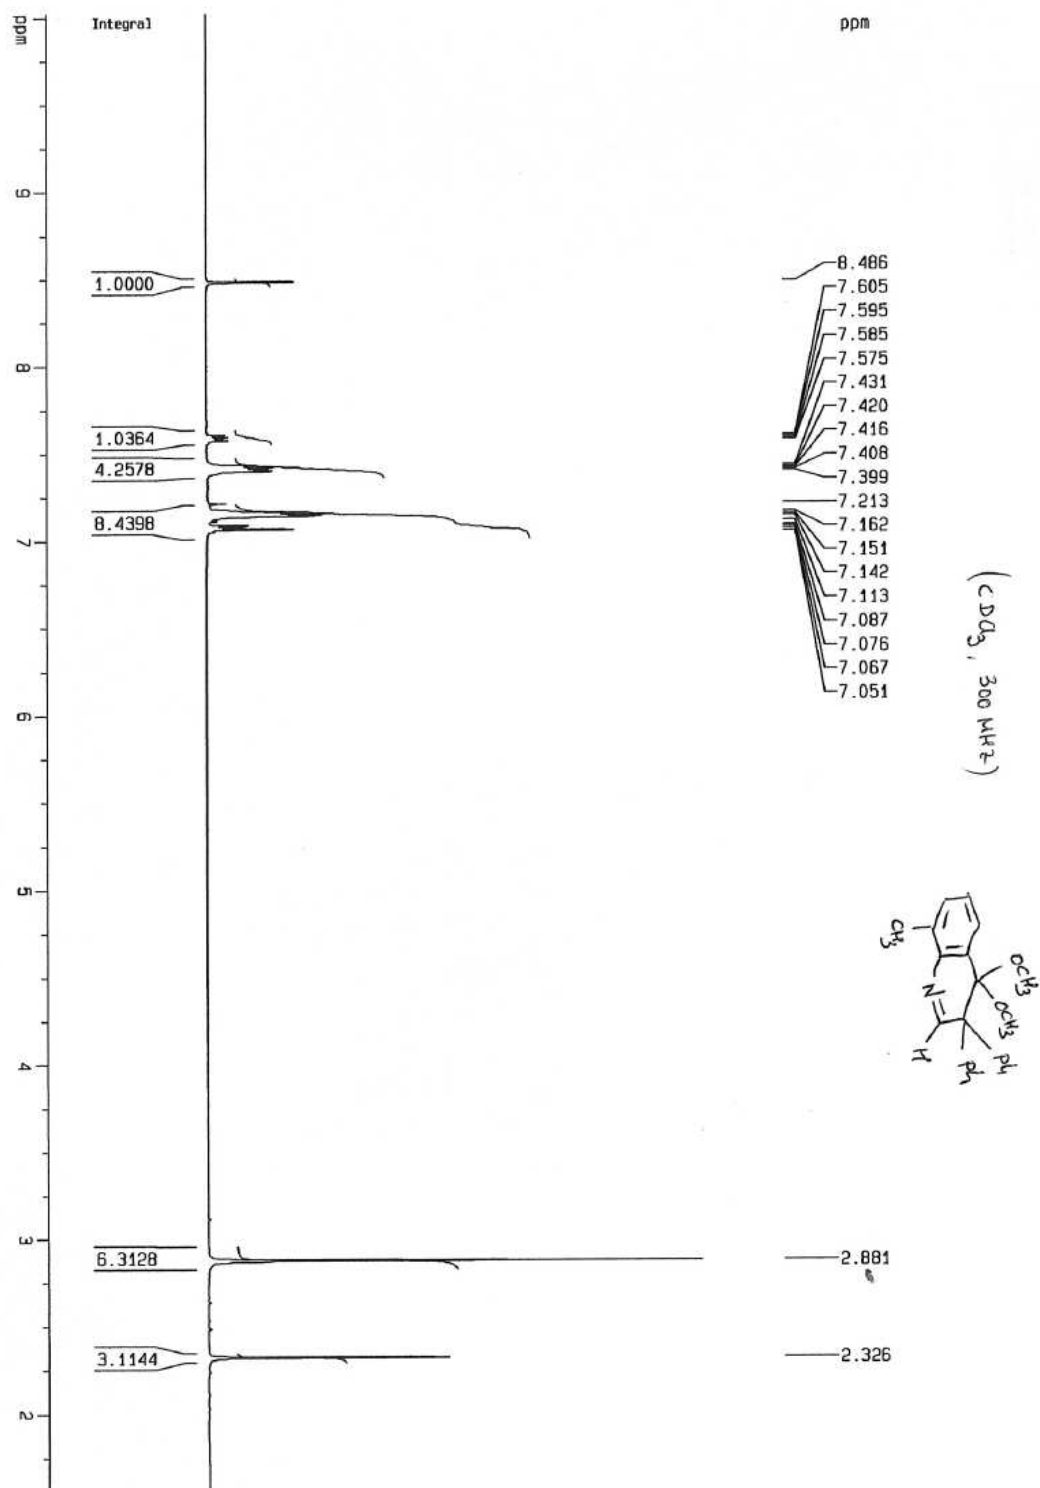

$^{13}\text{C}$  NMR of **12b**

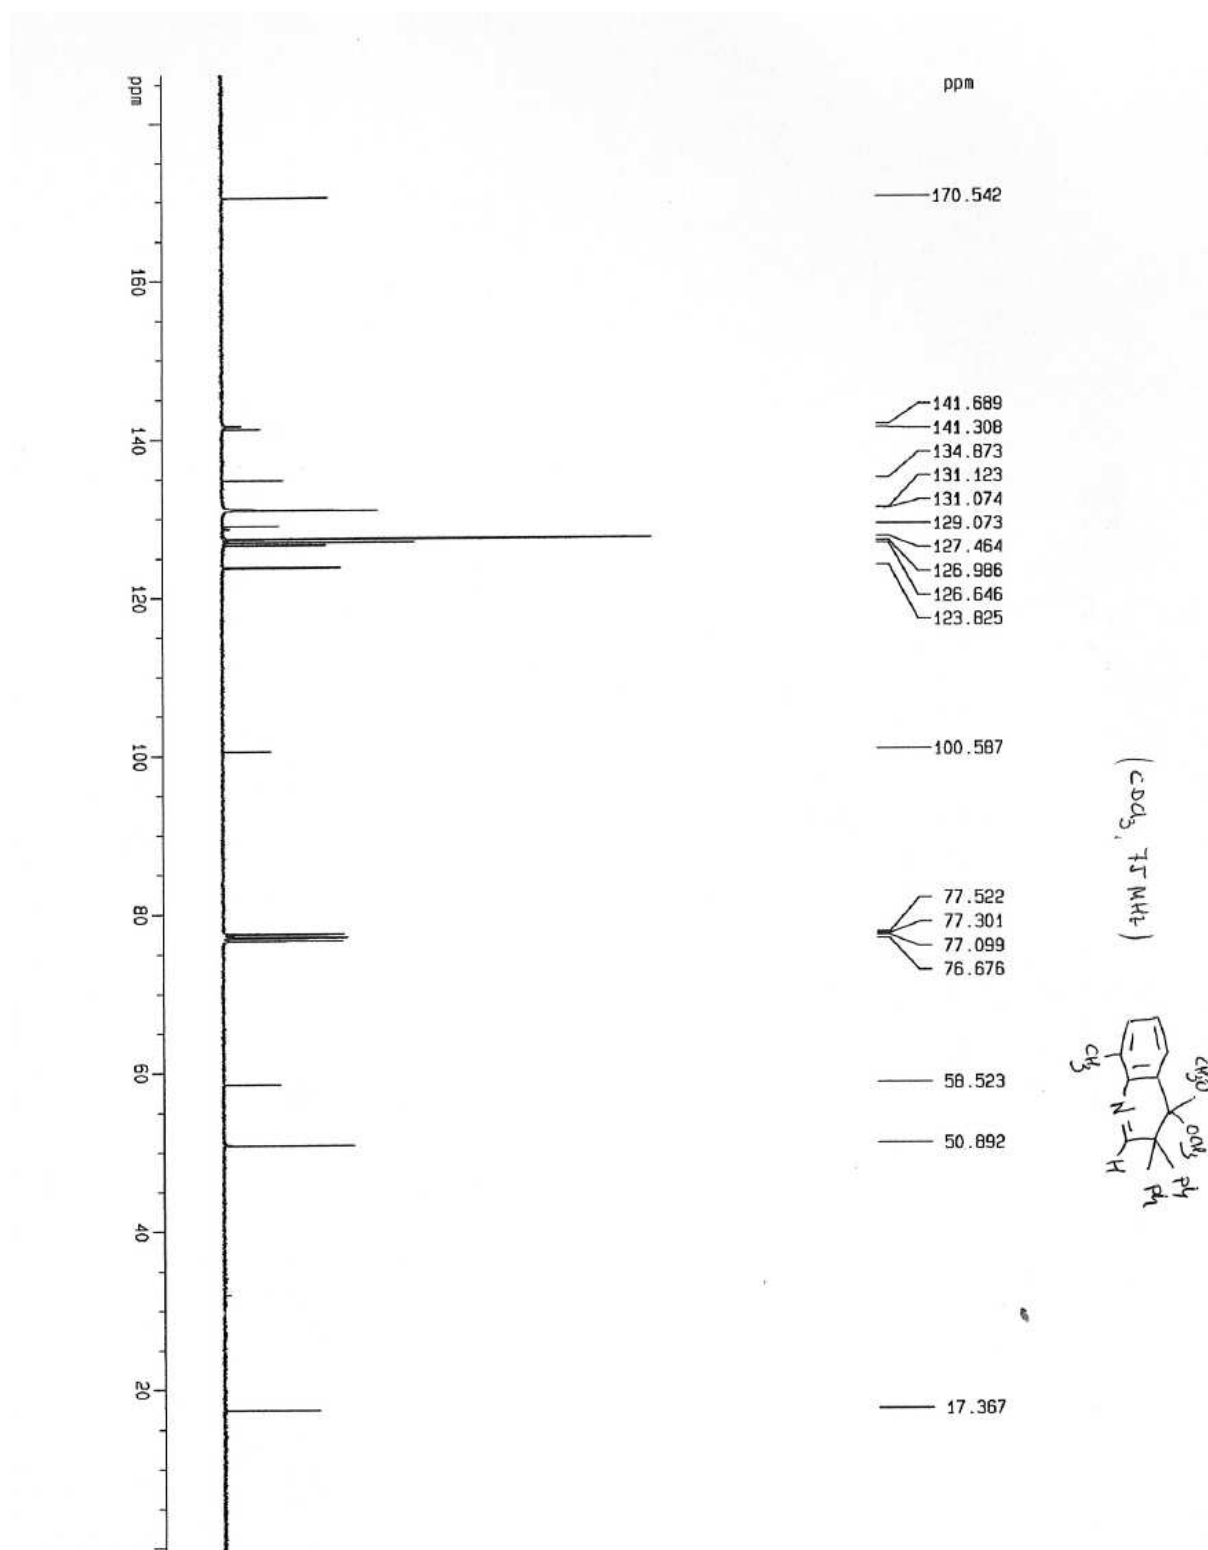

<sup>1</sup>H NMR of **12c**

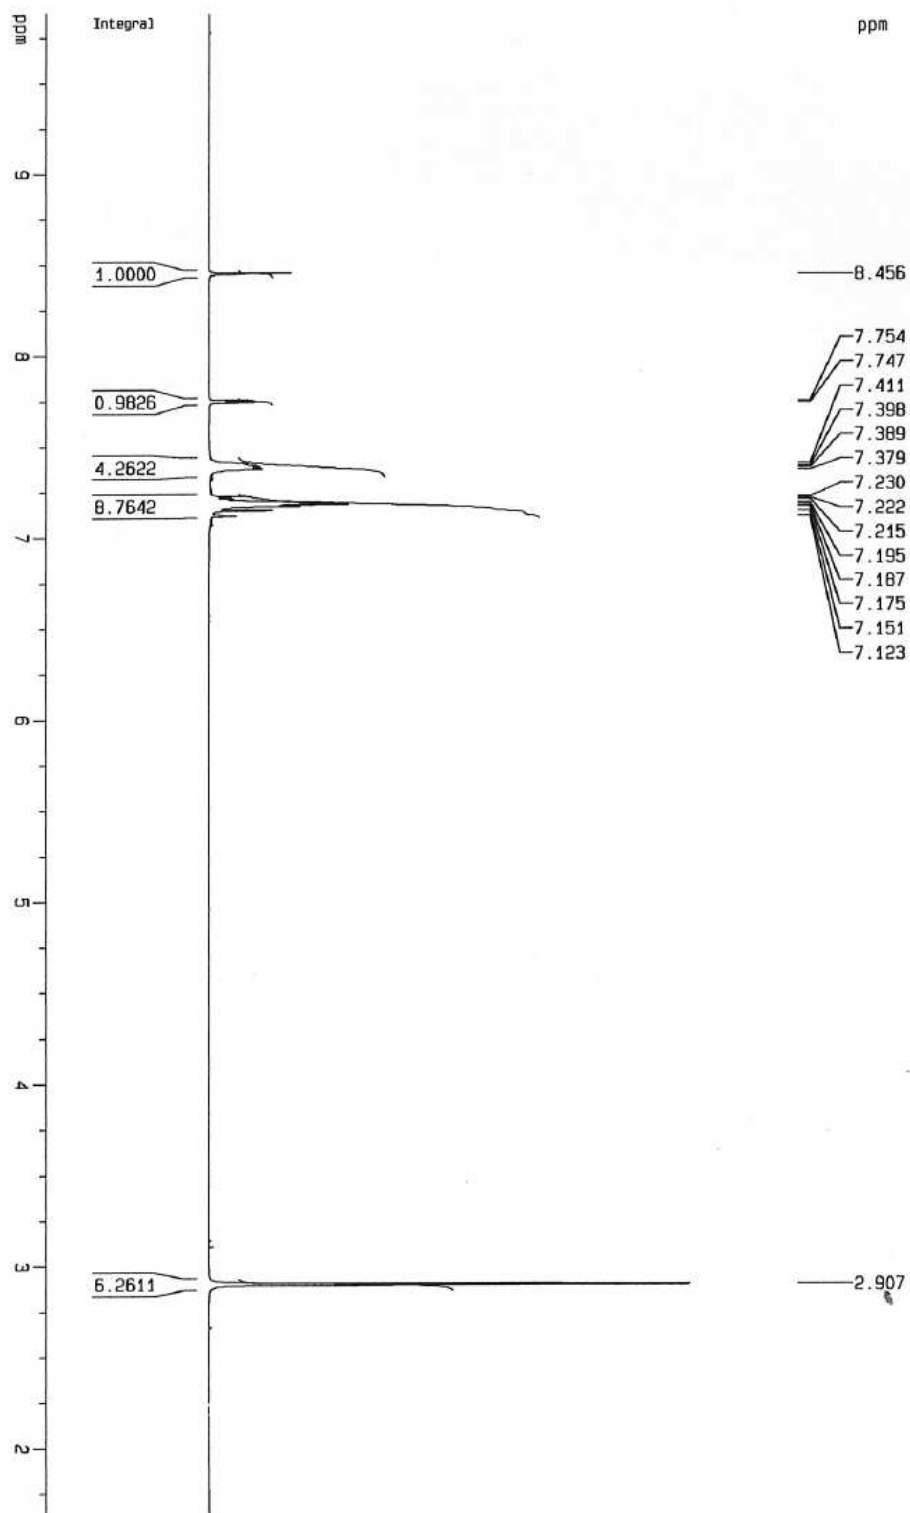

$^{13}\text{C}$  NMR of **12c**

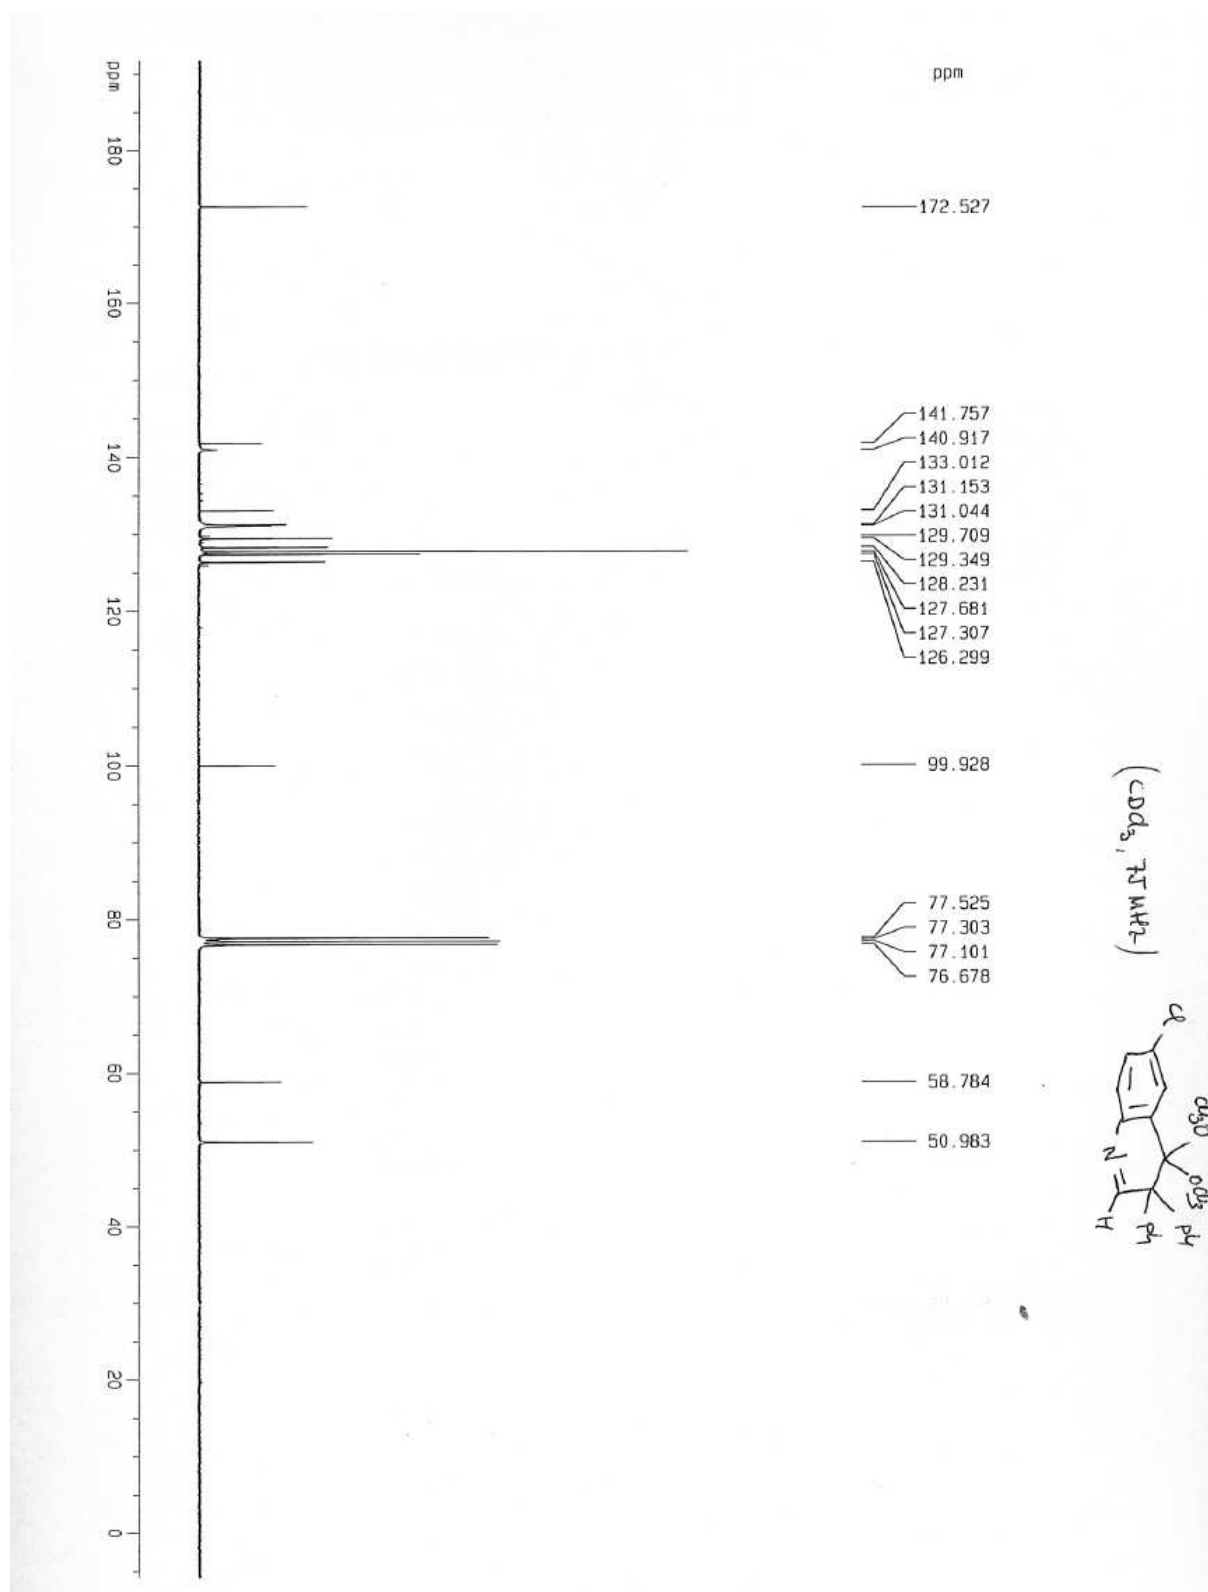

<sup>1</sup>H NMR of **12d**

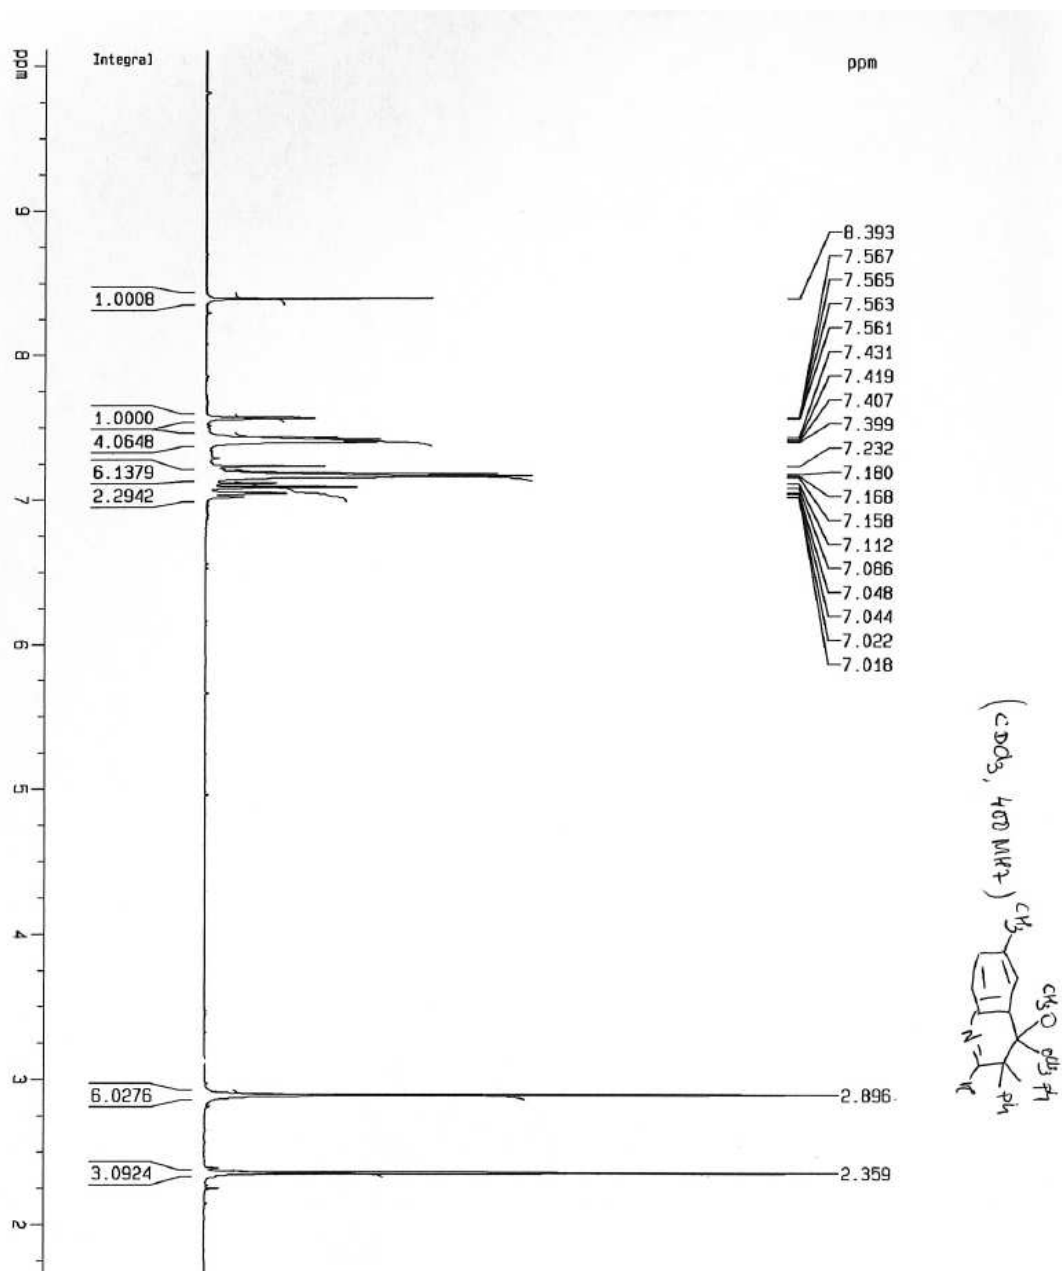

$^{13}\text{C}$  NMR of **12d**

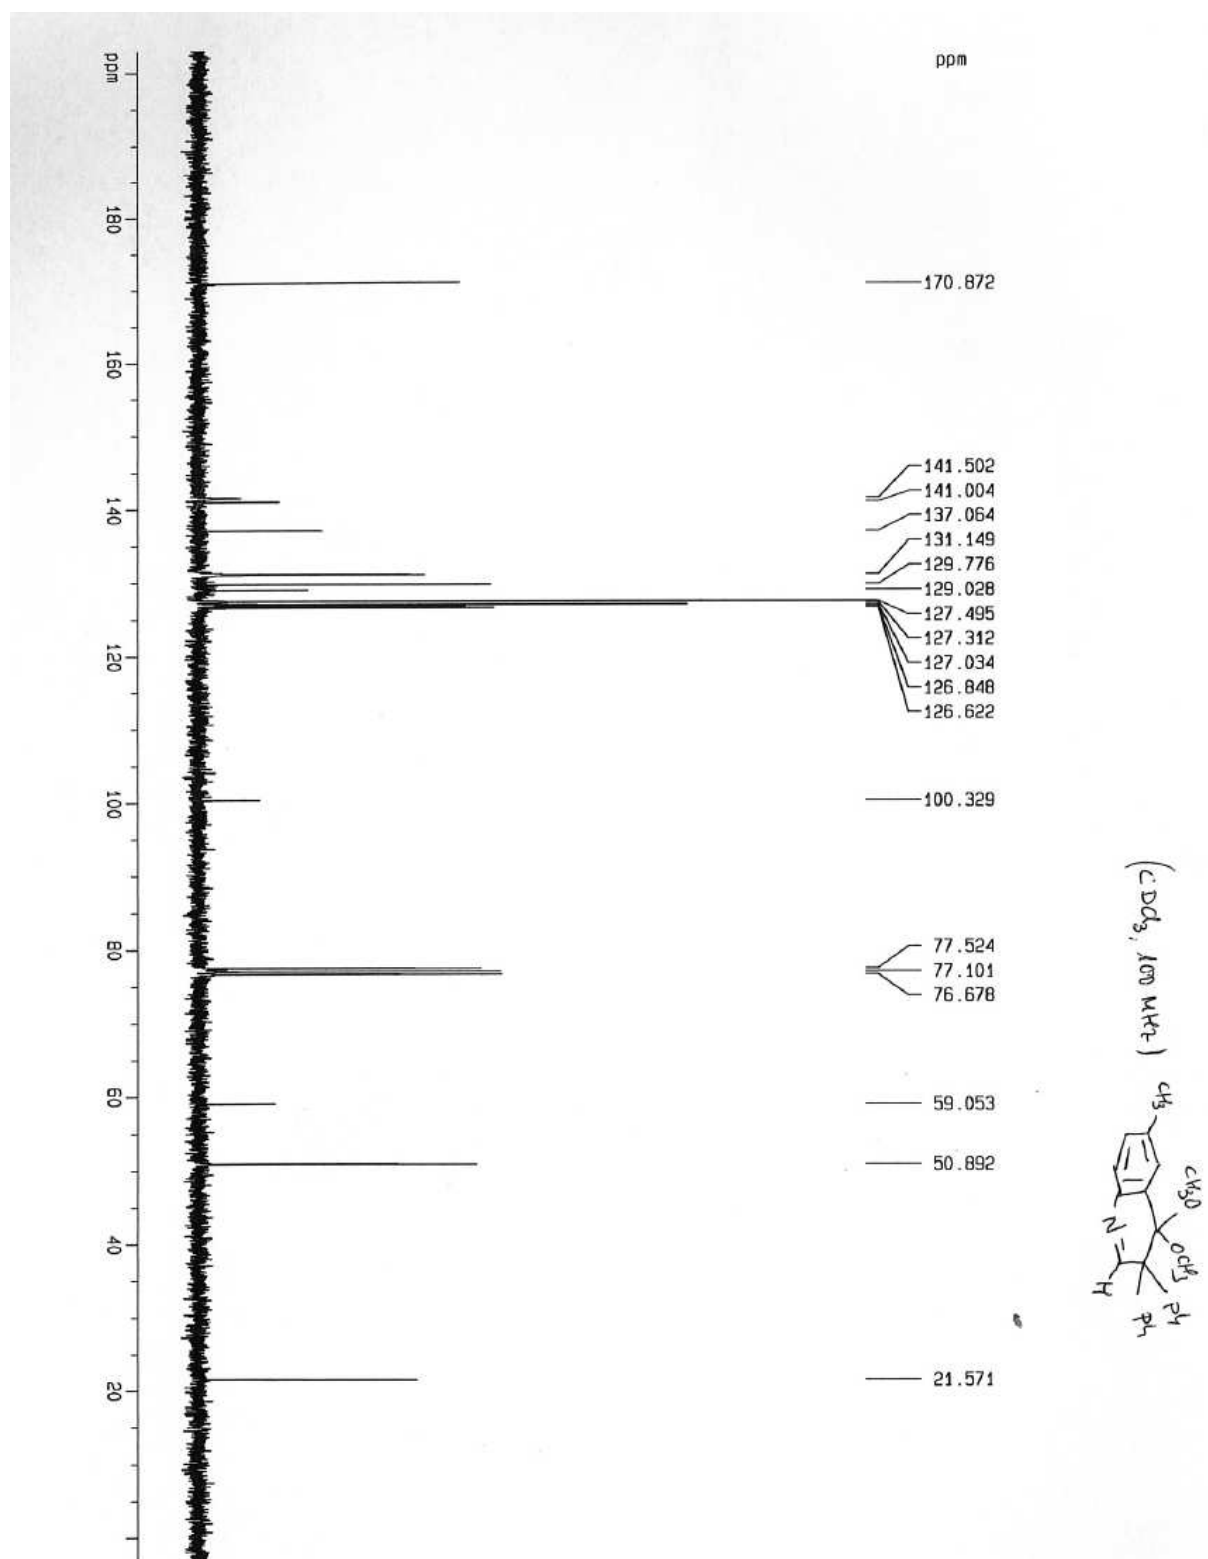

<sup>1</sup>H NMR of **12e**

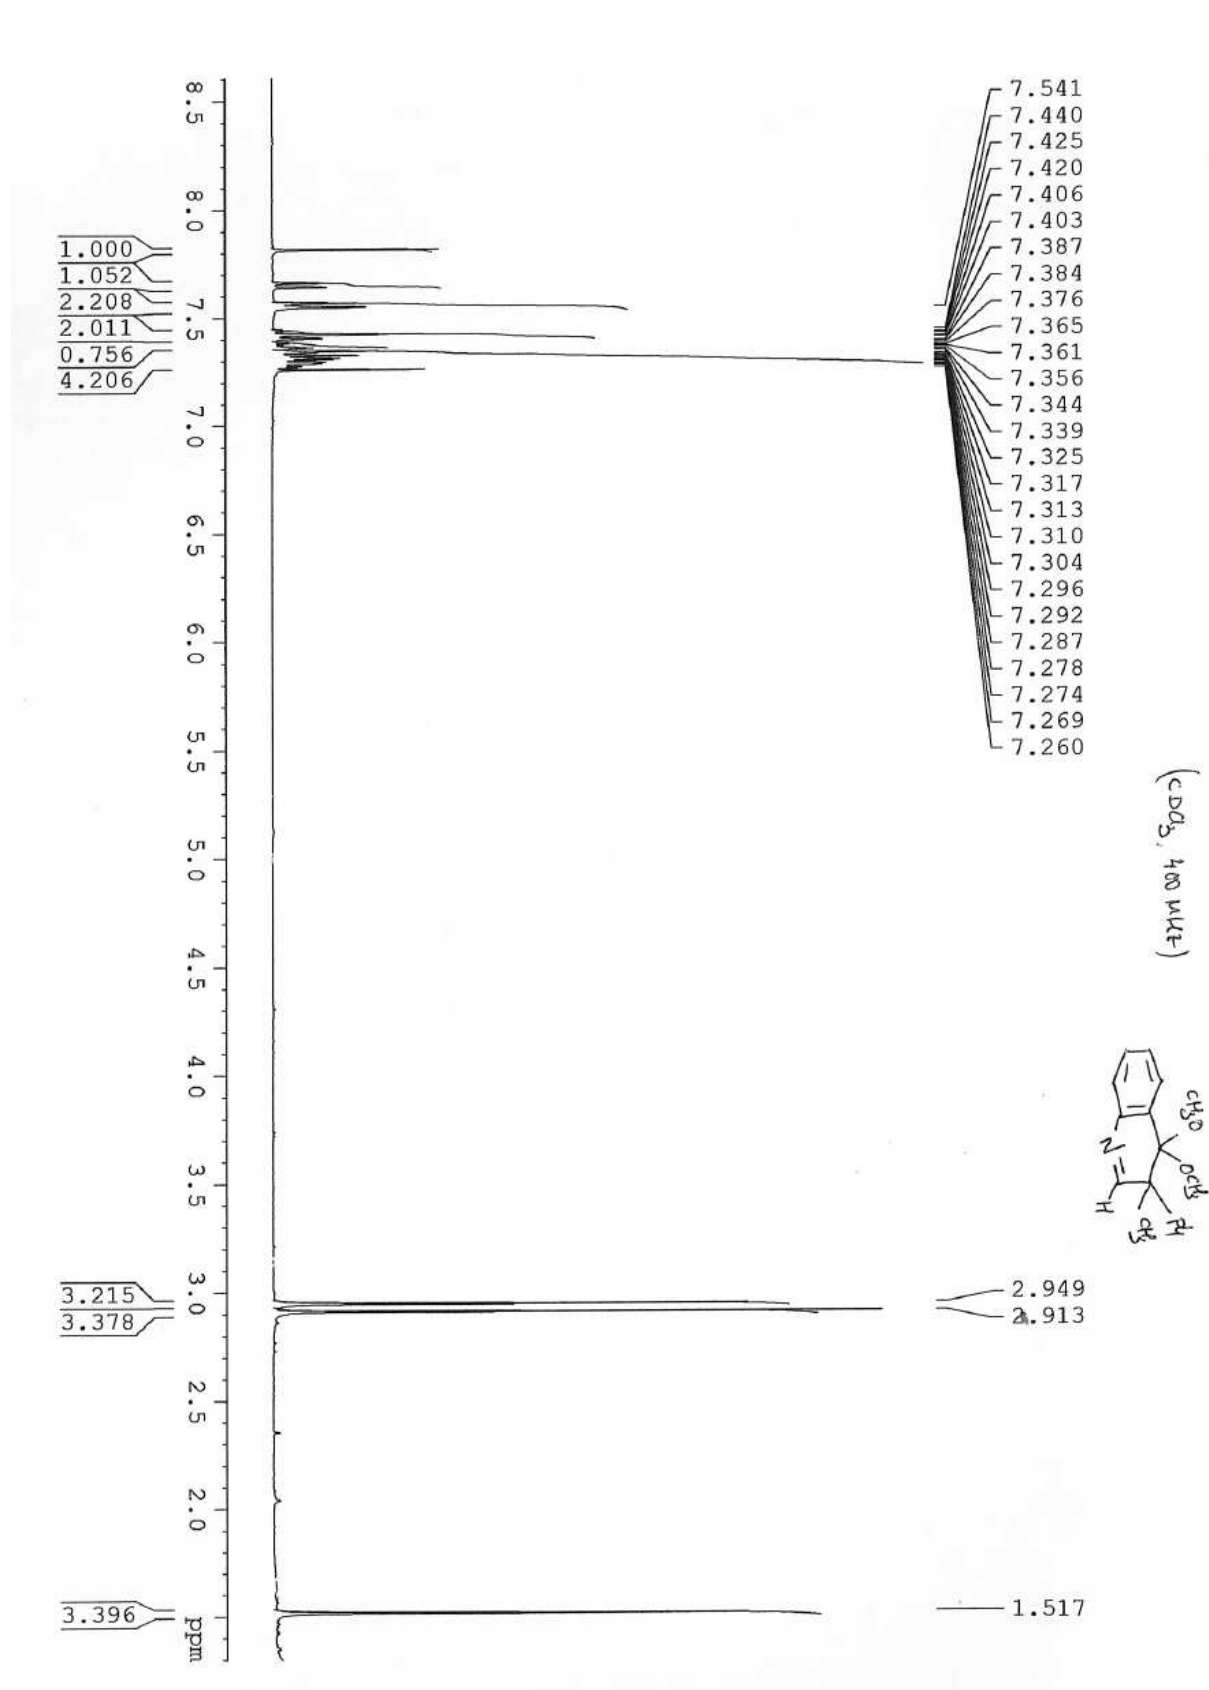

$^{13}\text{C}$  NMR of **12e**

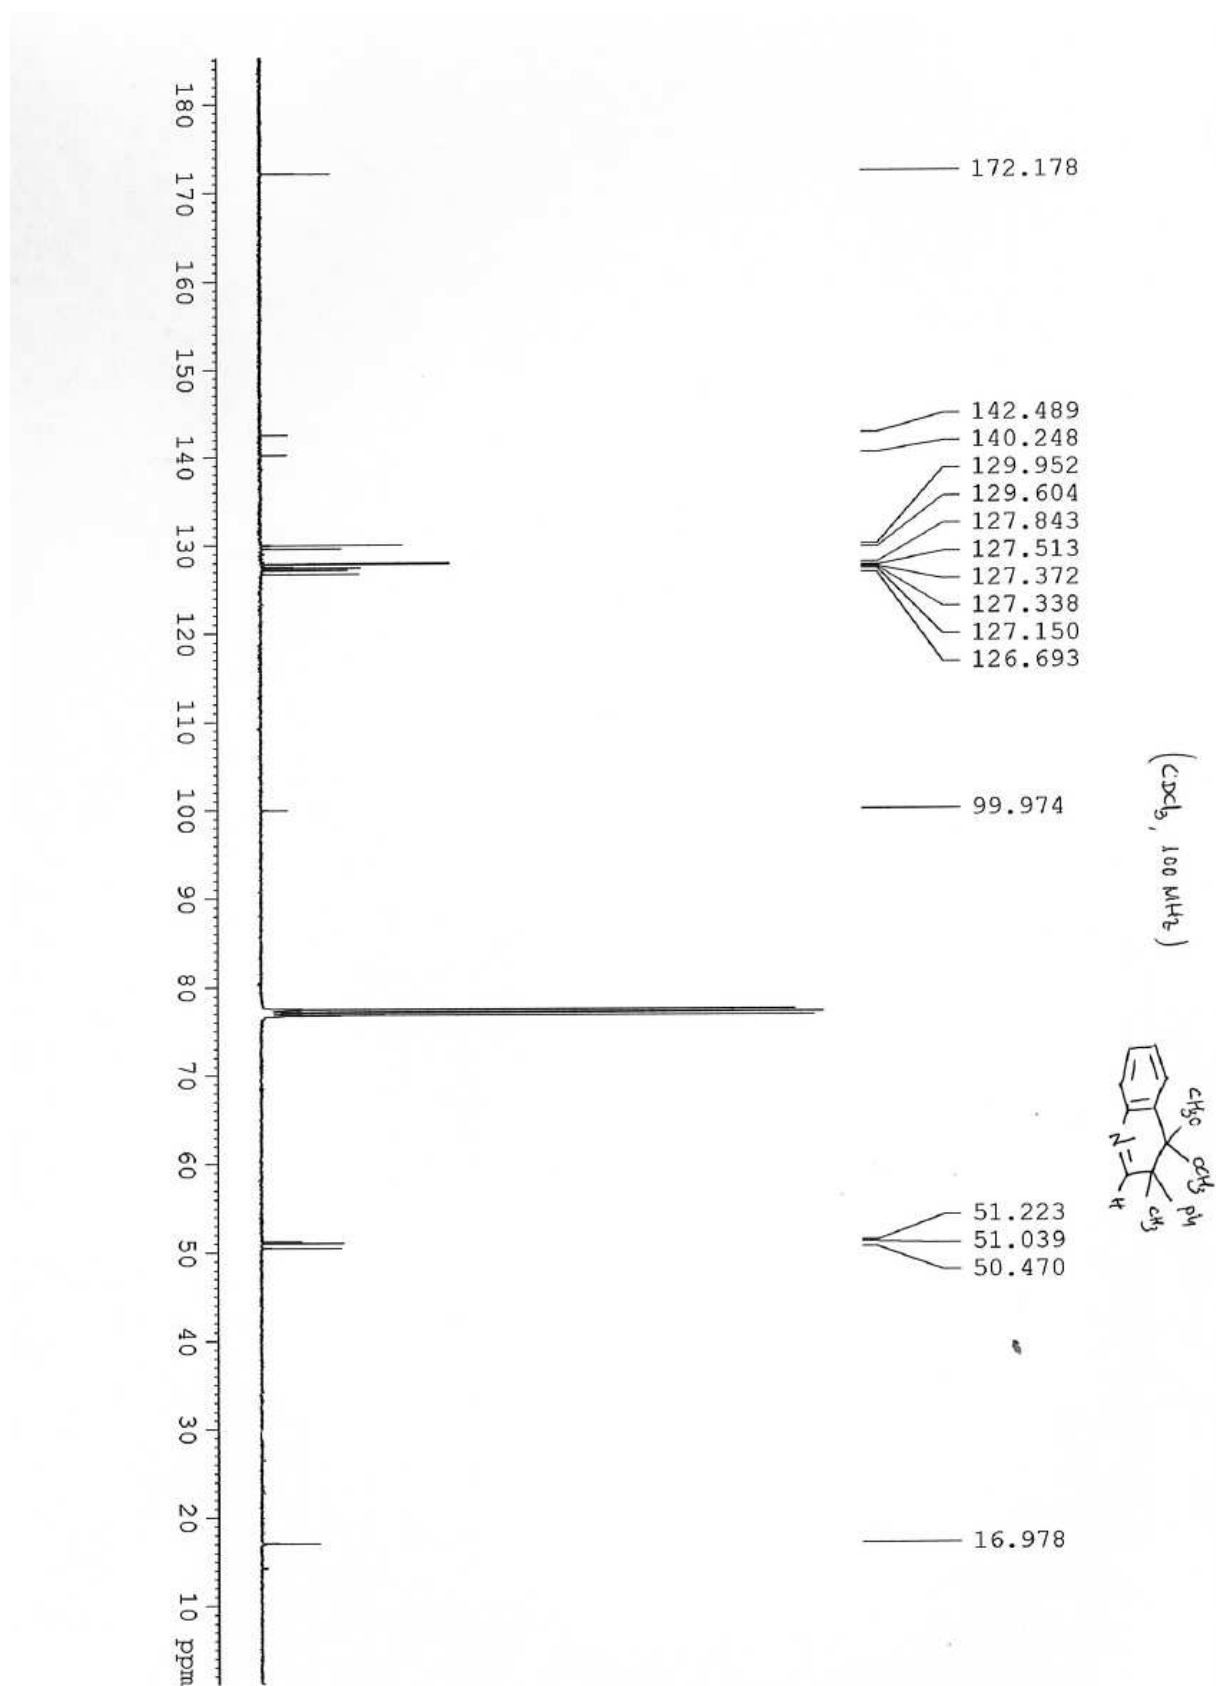



$^1\text{H}$  NMR of **12f**

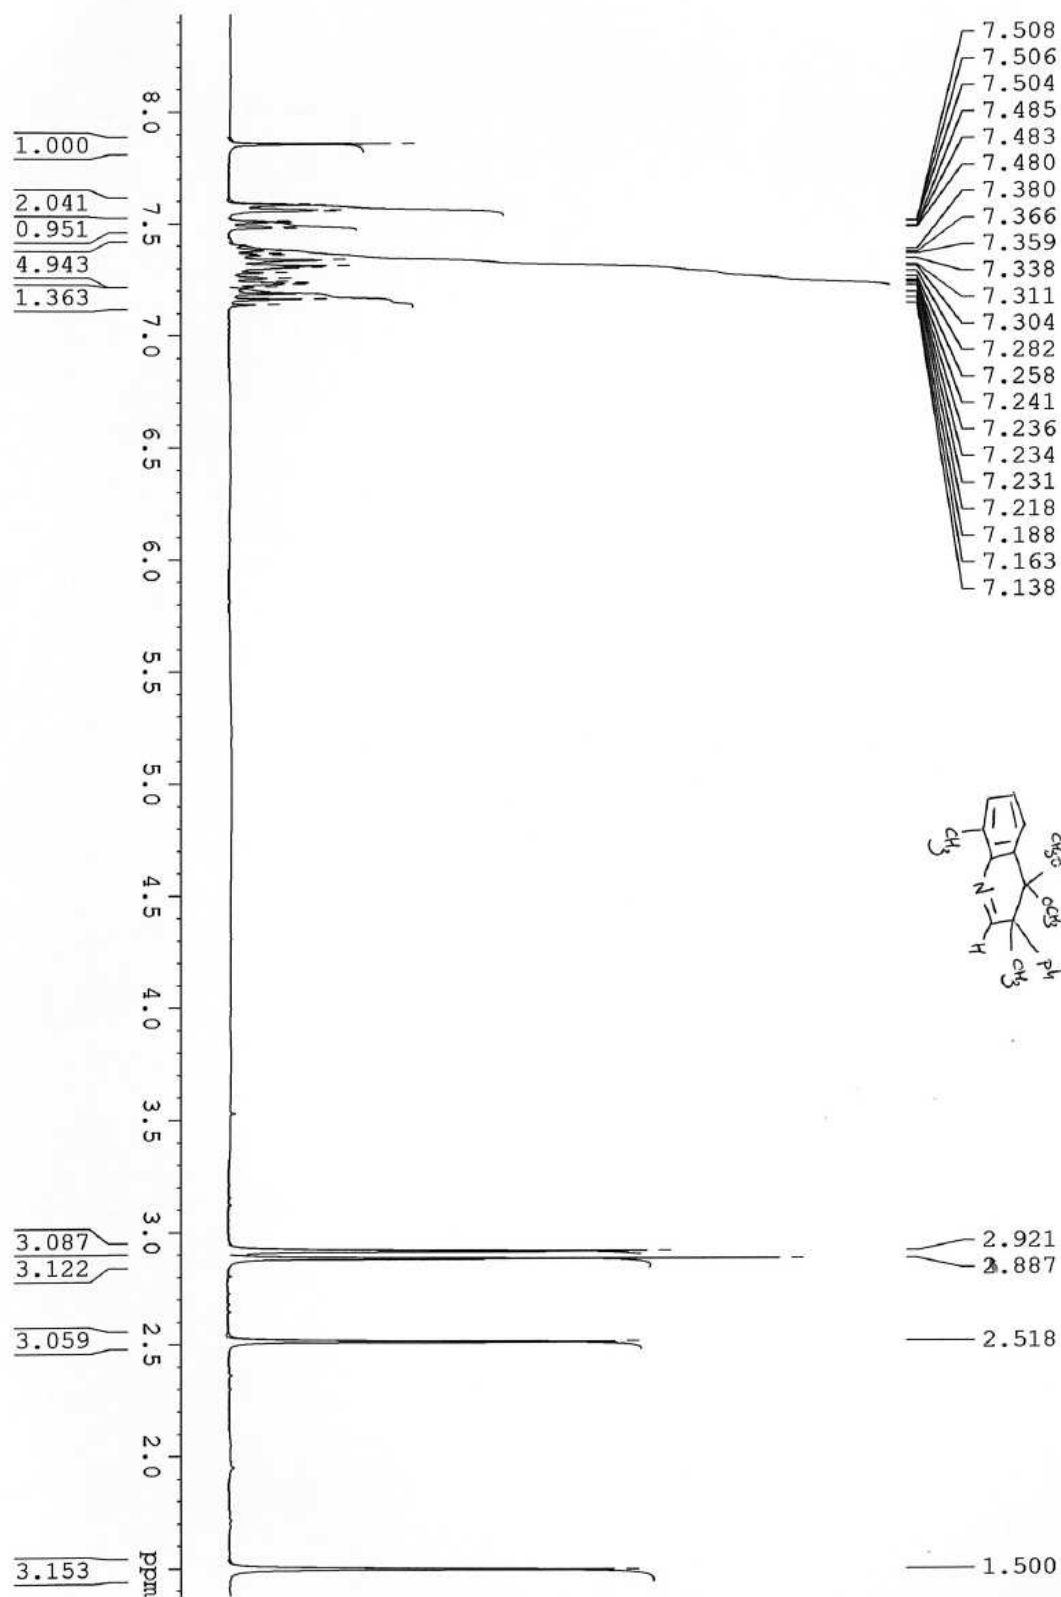

( $\text{CDCl}_3$ , 300 MHz)

$^{13}\text{C}$  NMR of **12f**

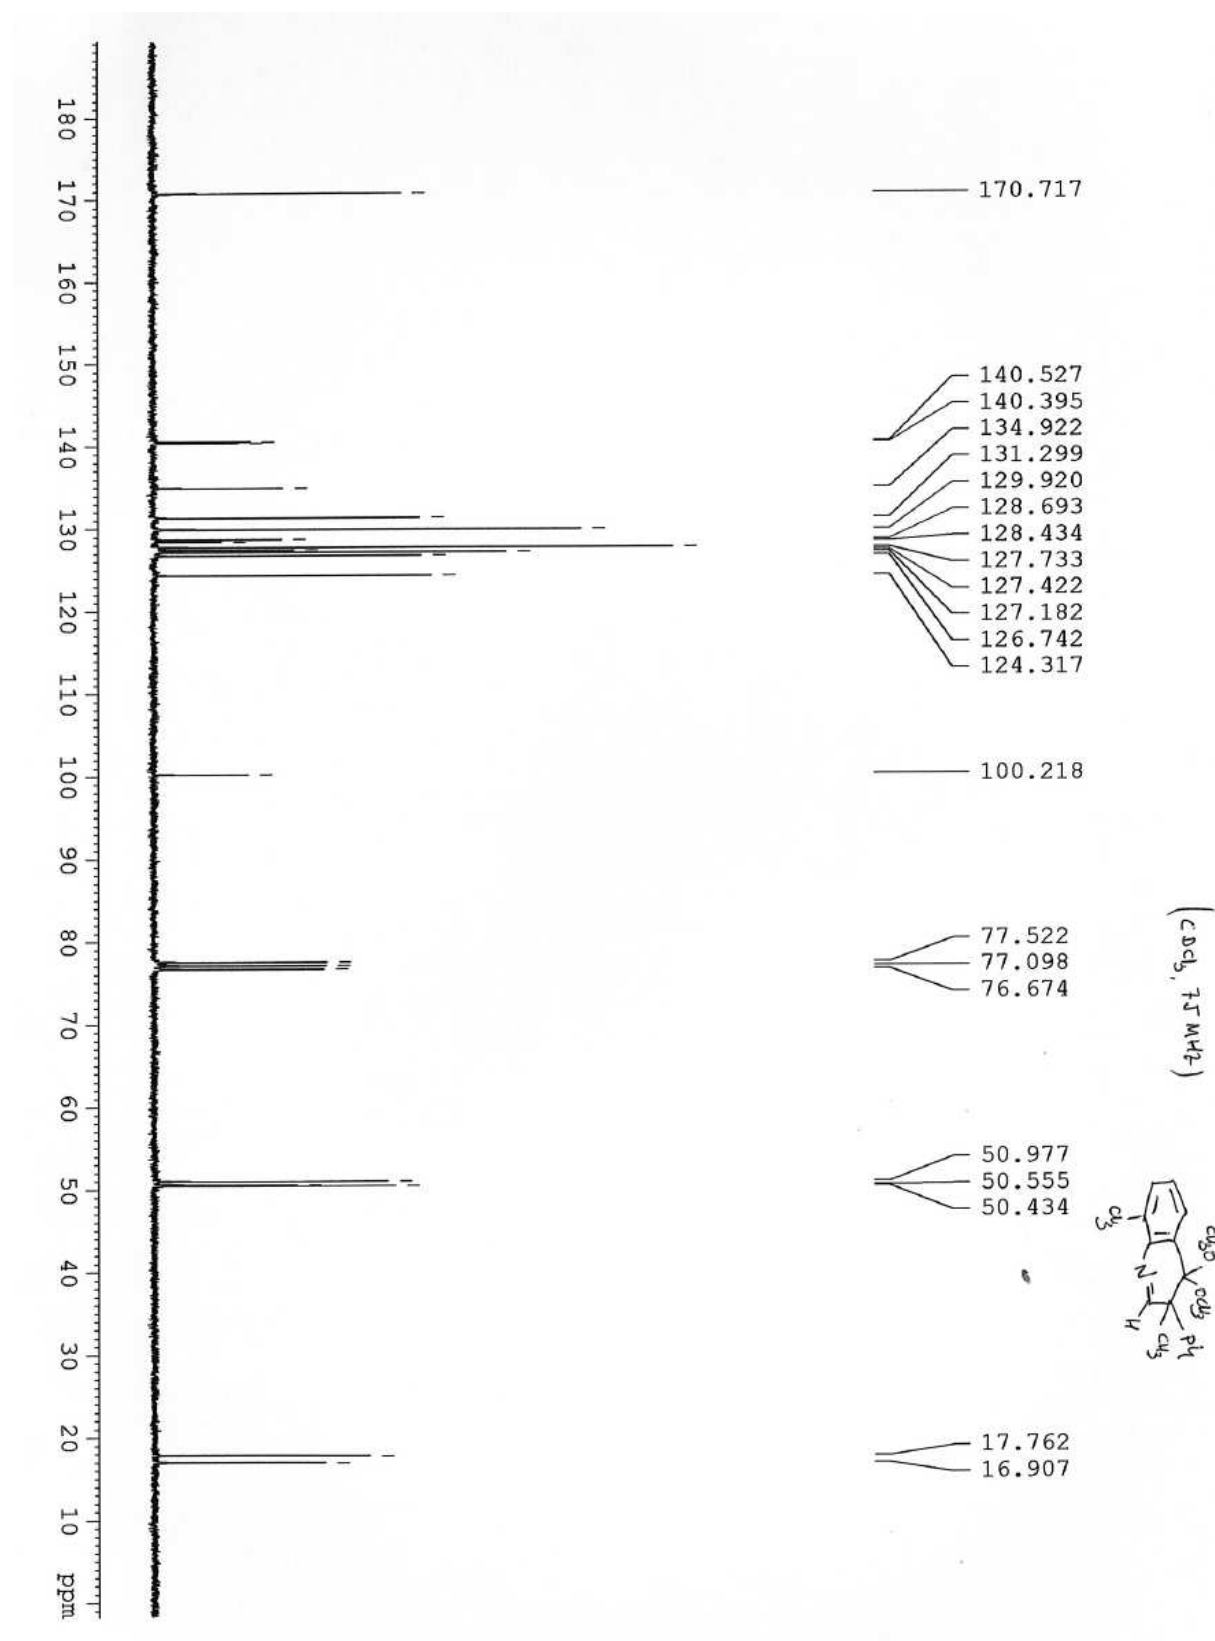

<sup>1</sup>H NMR of **13a**

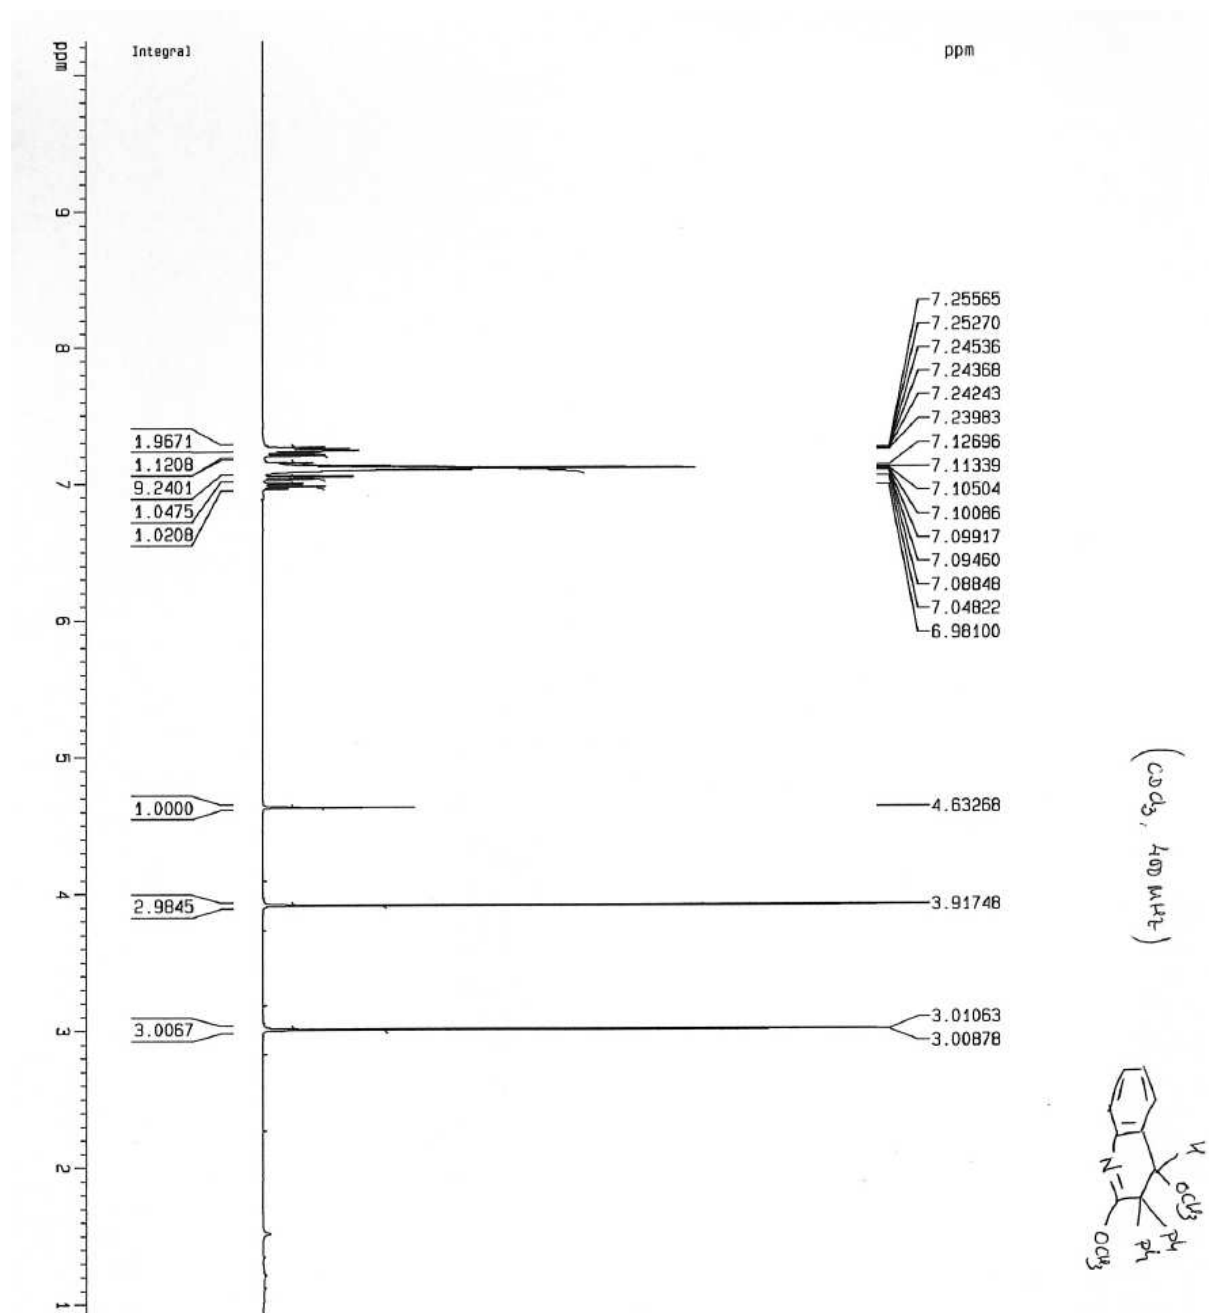

$^{13}\text{C}$  NMR of **13a**

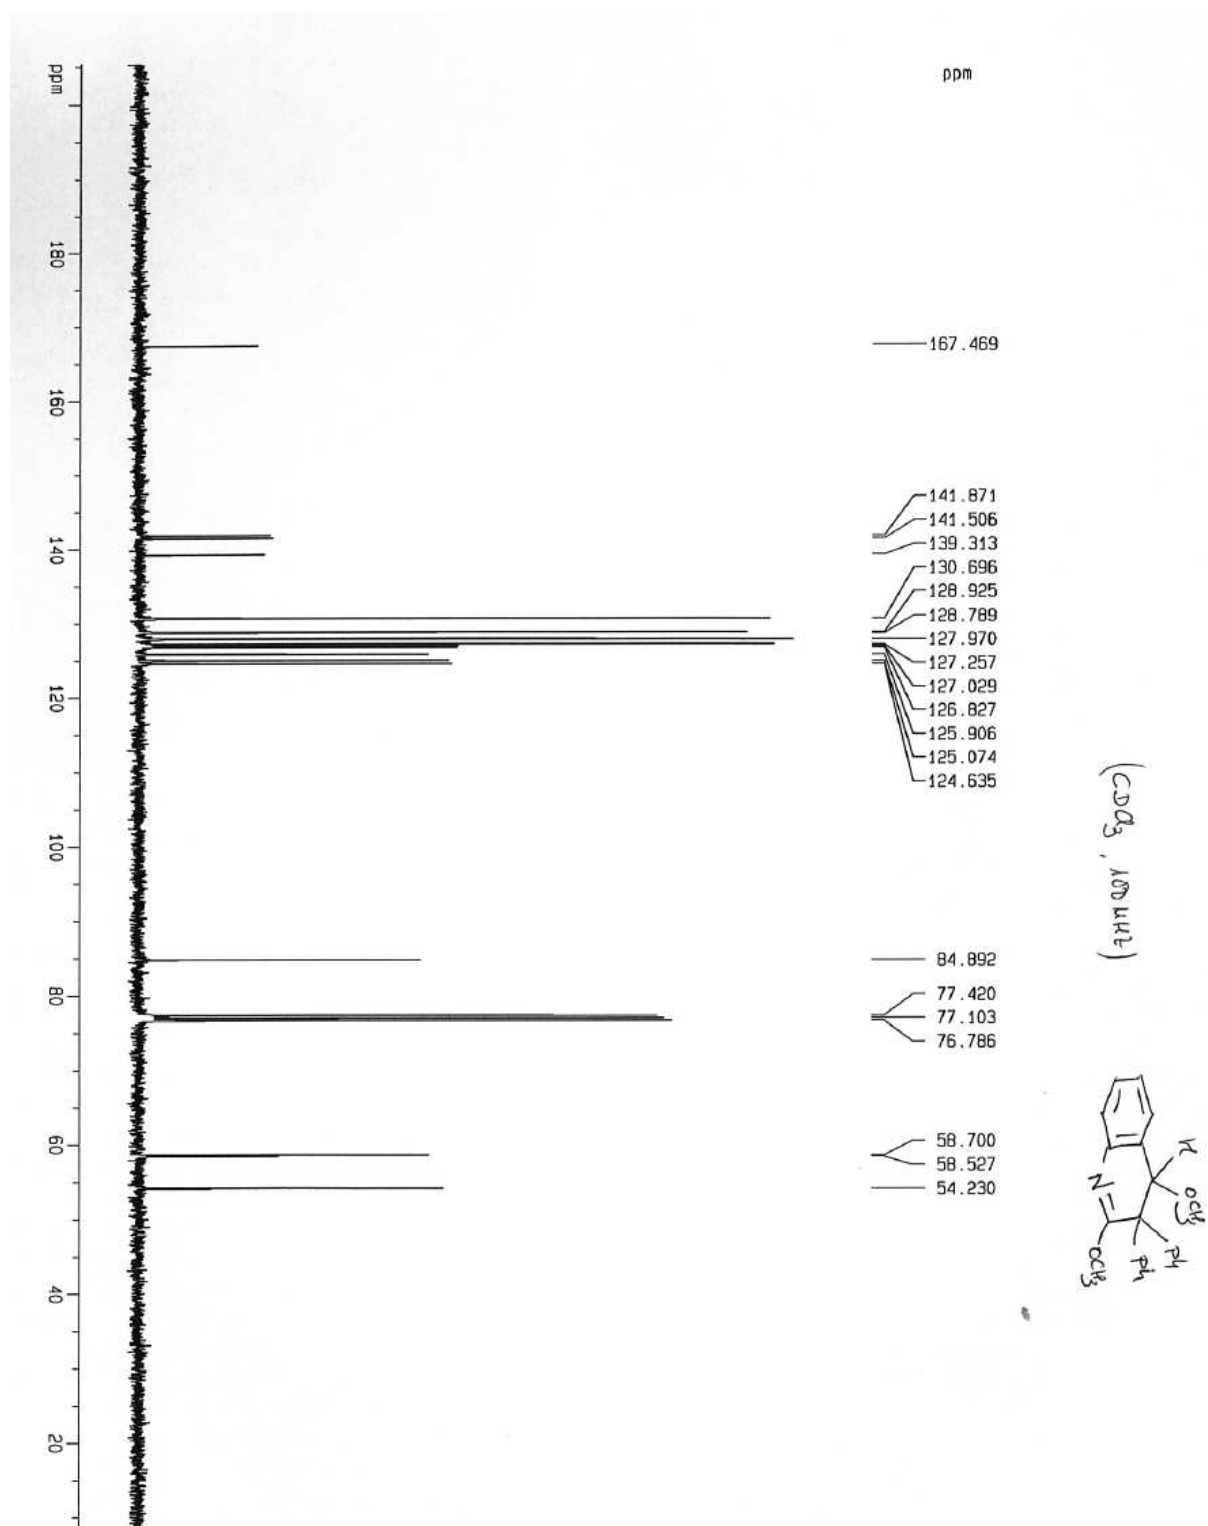

<sup>1</sup>H NMR of **13b**

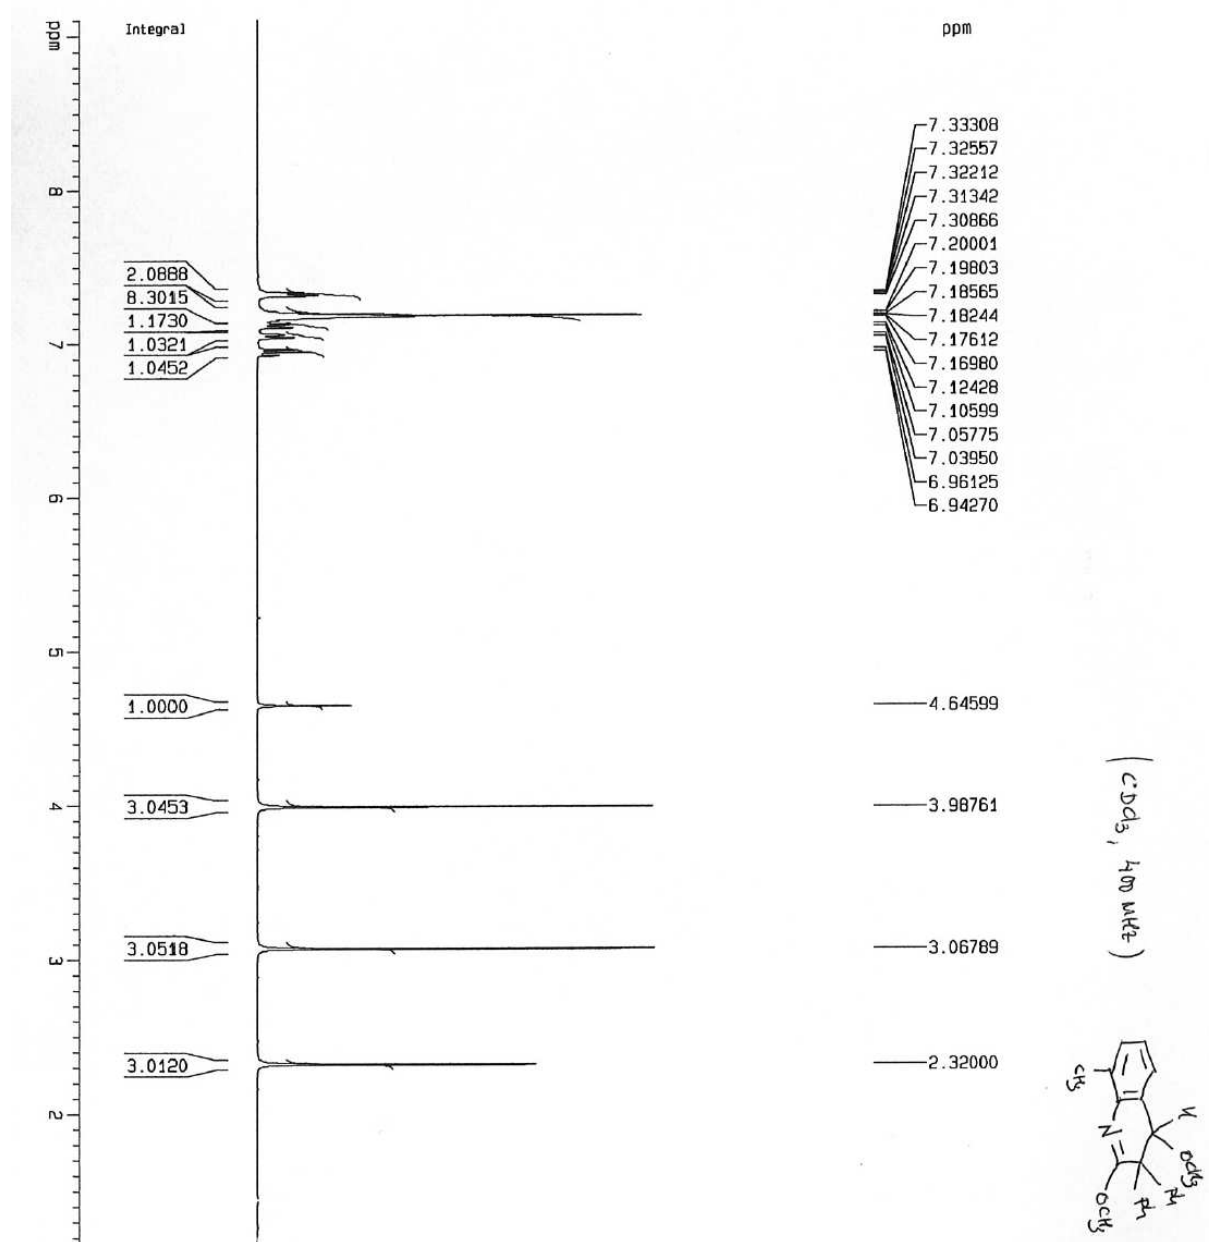

$^{13}\text{C}$  NMR of **13b**

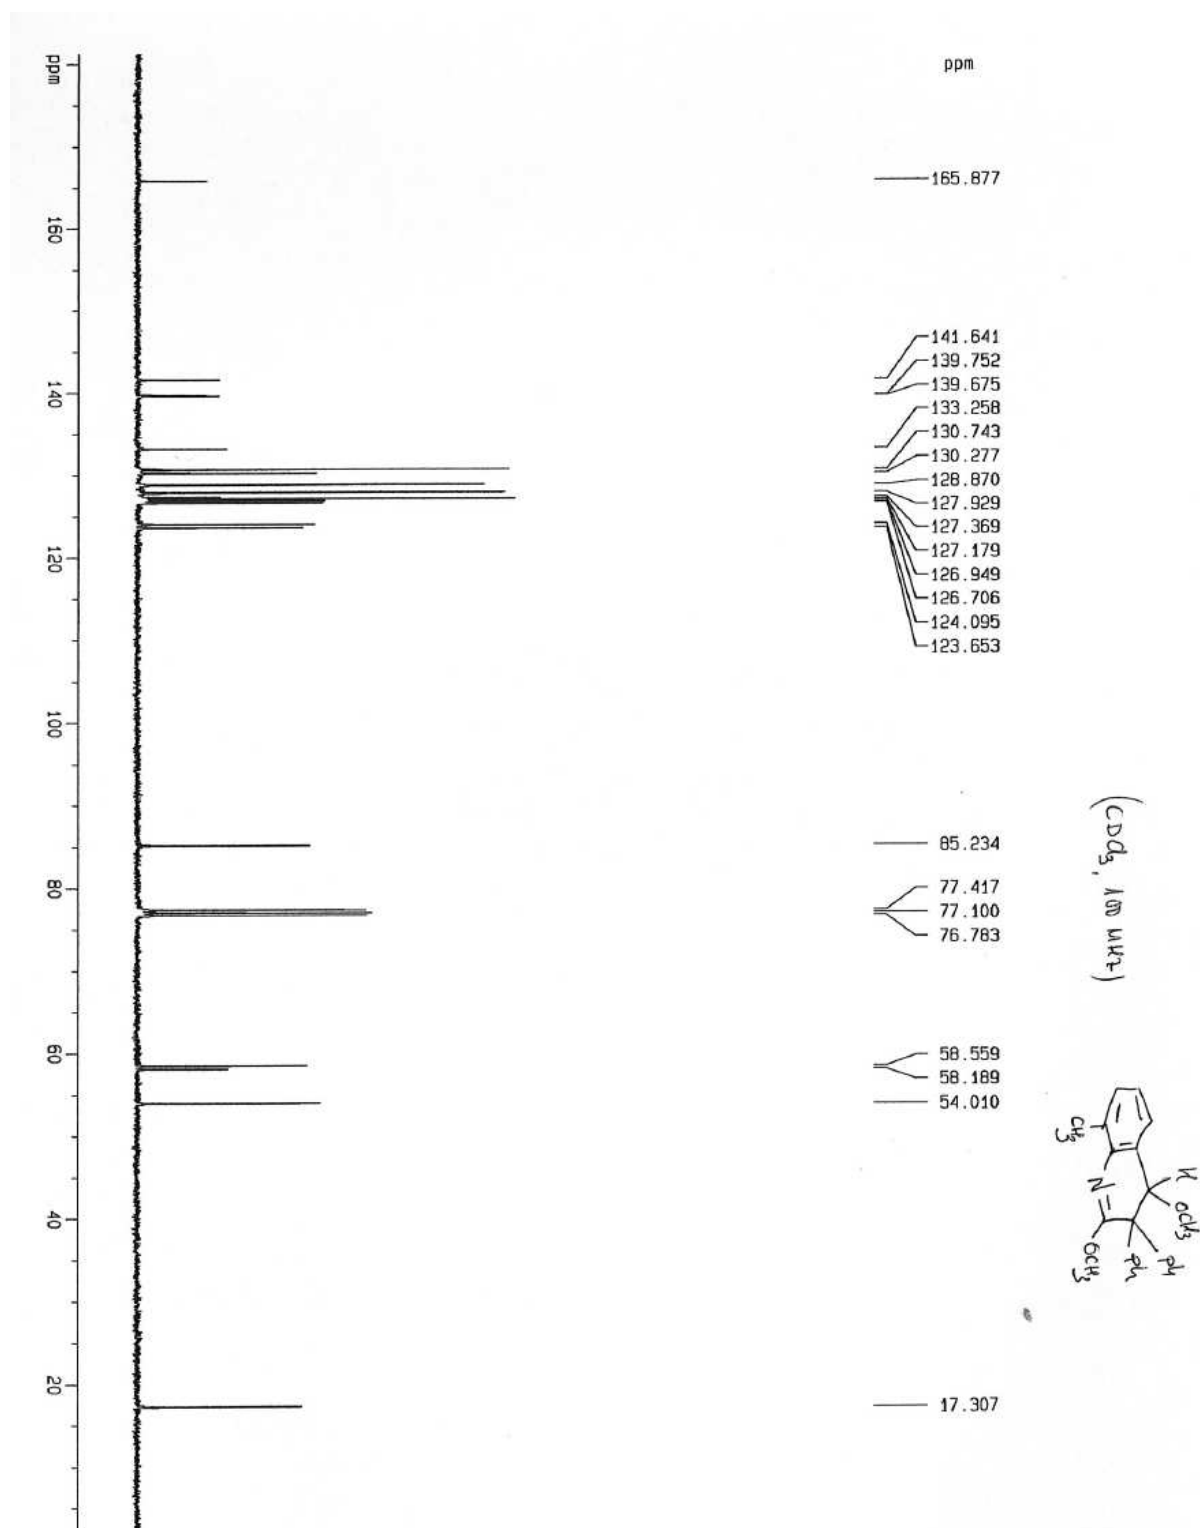

<sup>1</sup>H NMR of **13c**

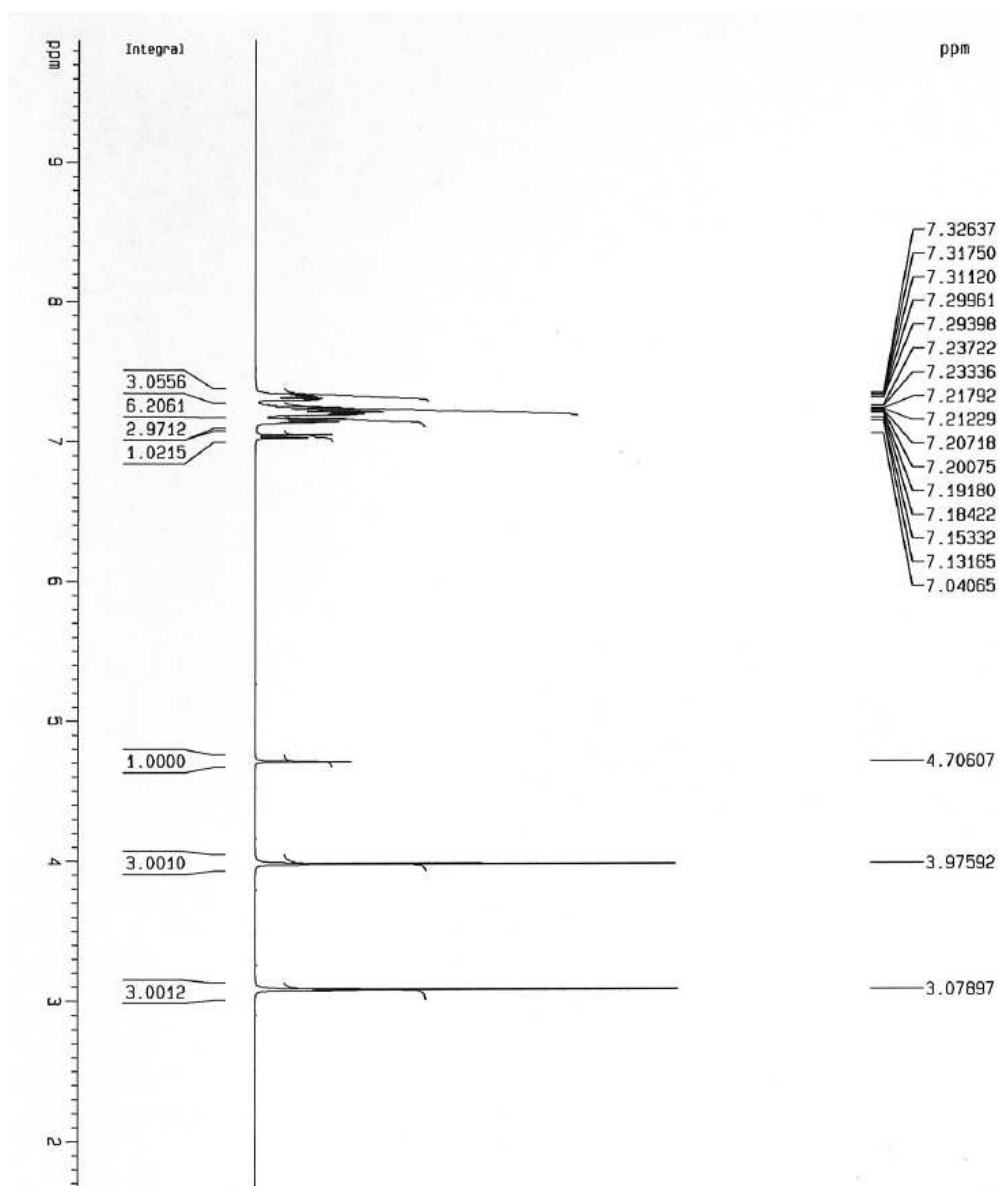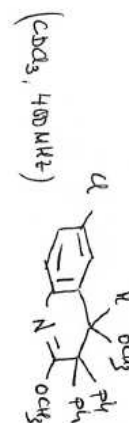

$^{13}\text{C}$  NMR of **13c**

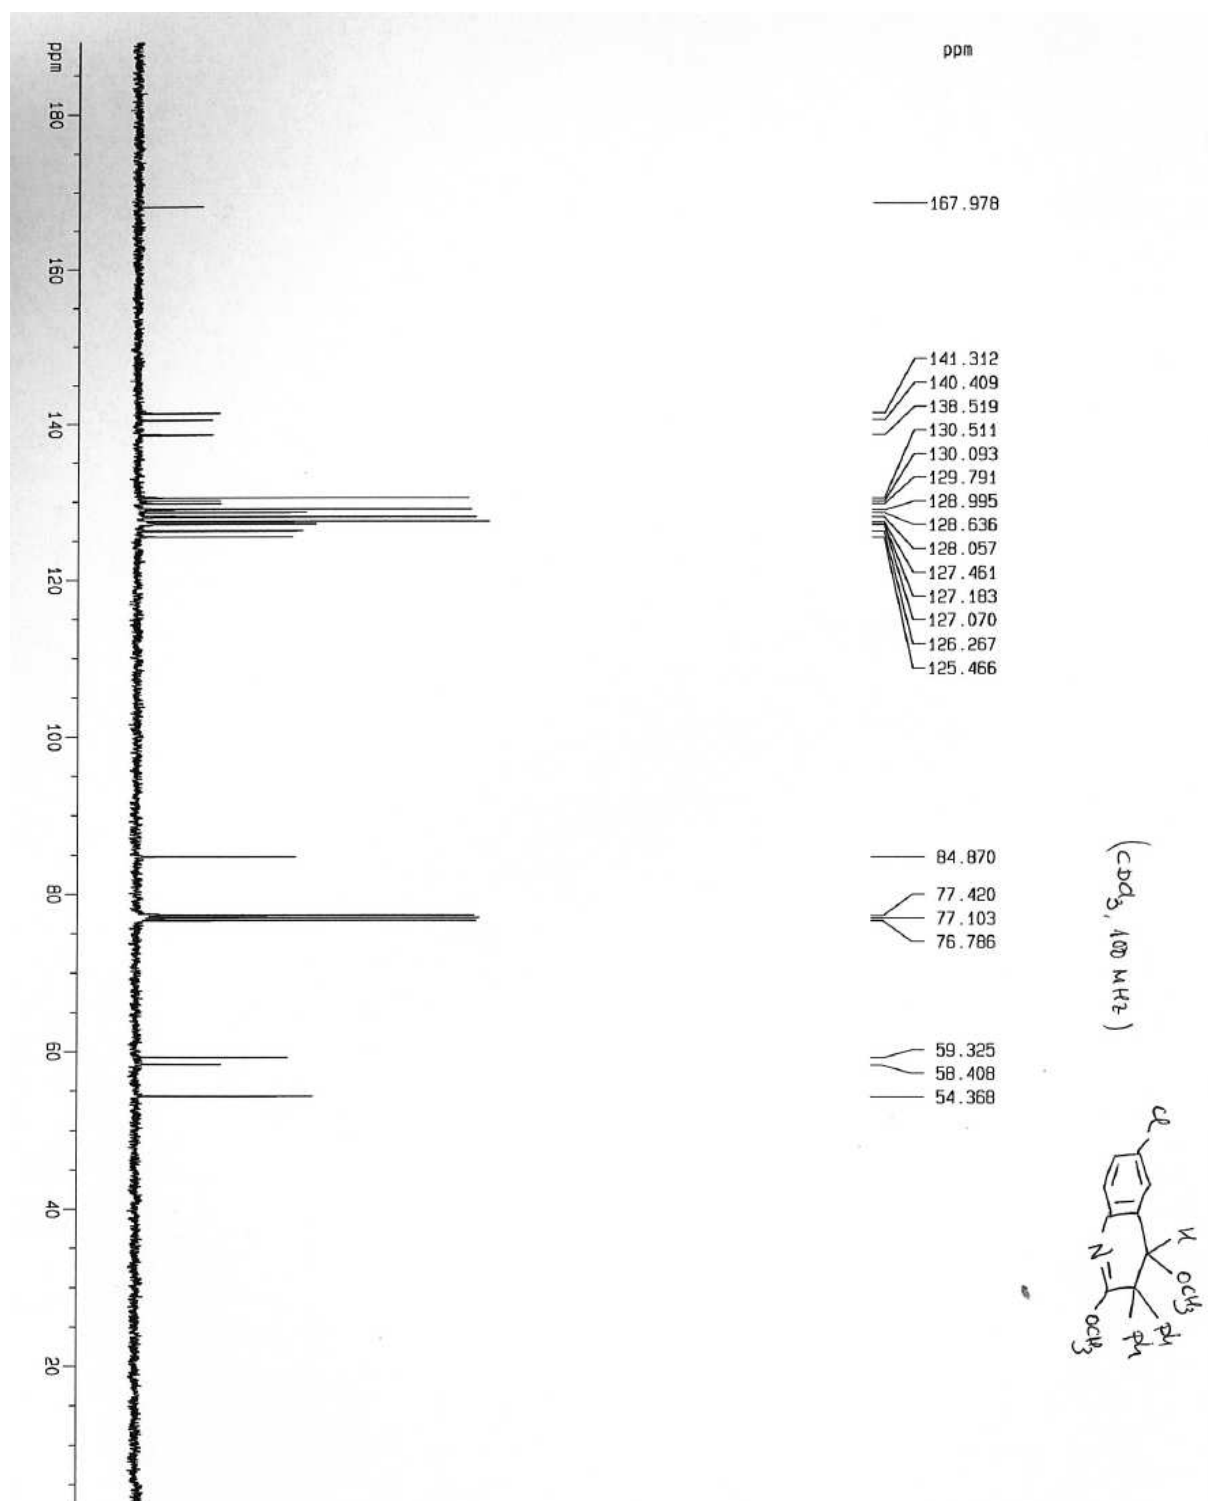



<sup>1</sup>H NMR of **13d**

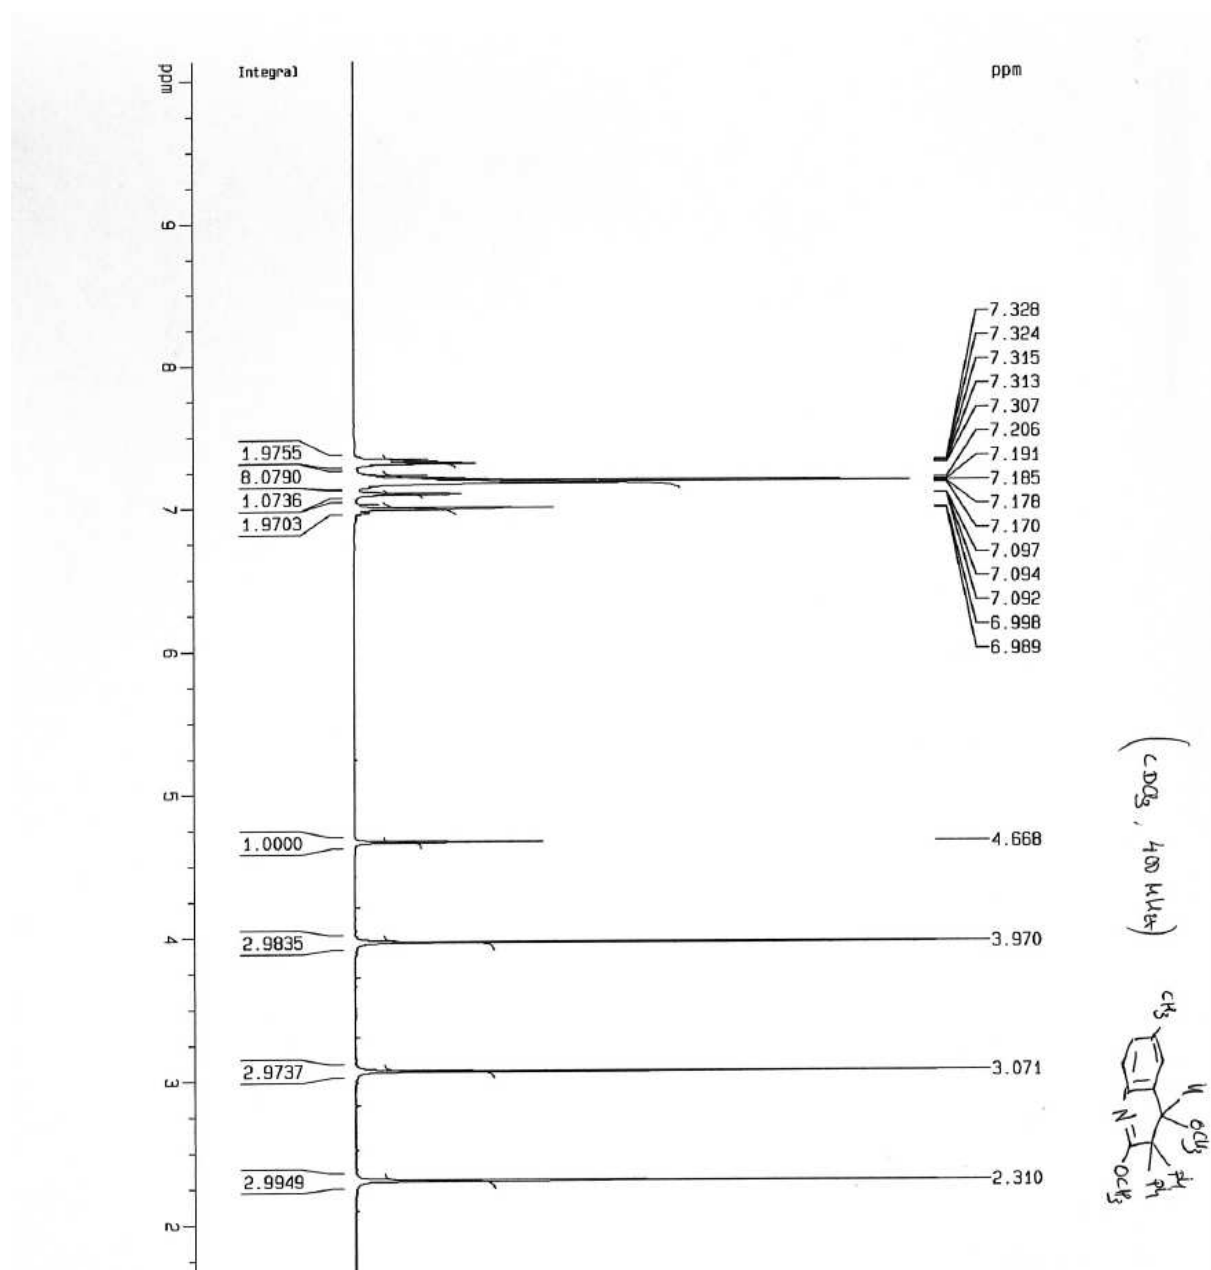

$^{13}\text{C}$  NMR of **13d**

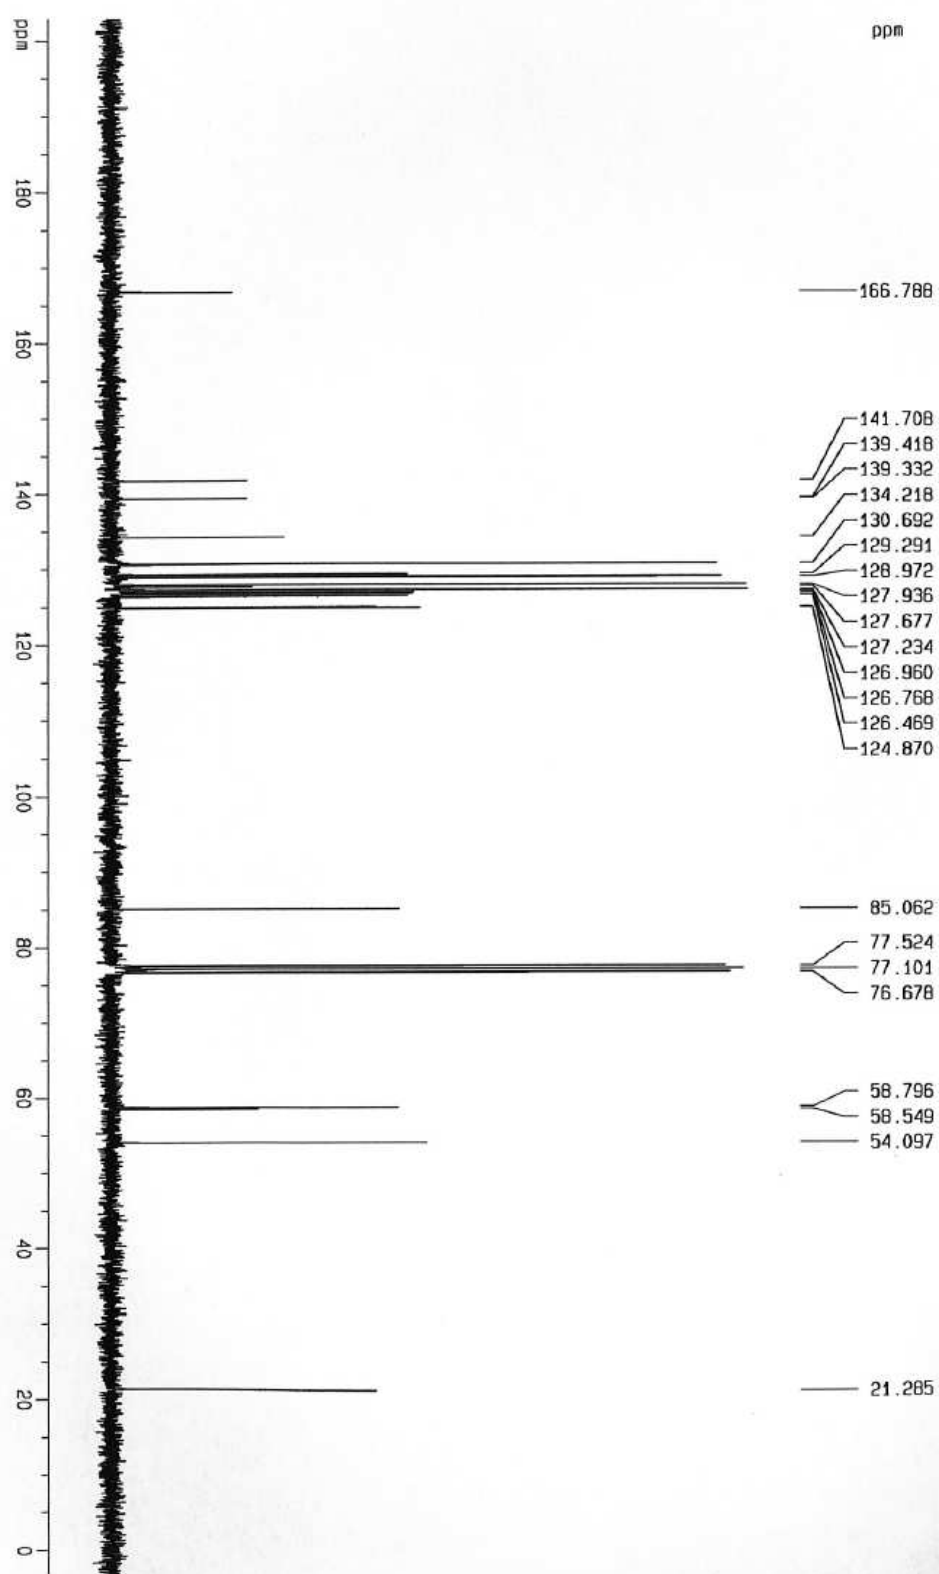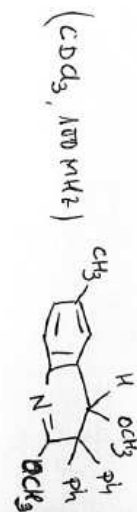

<sup>1</sup>H NMR of diastereoisomer 1 of 13e

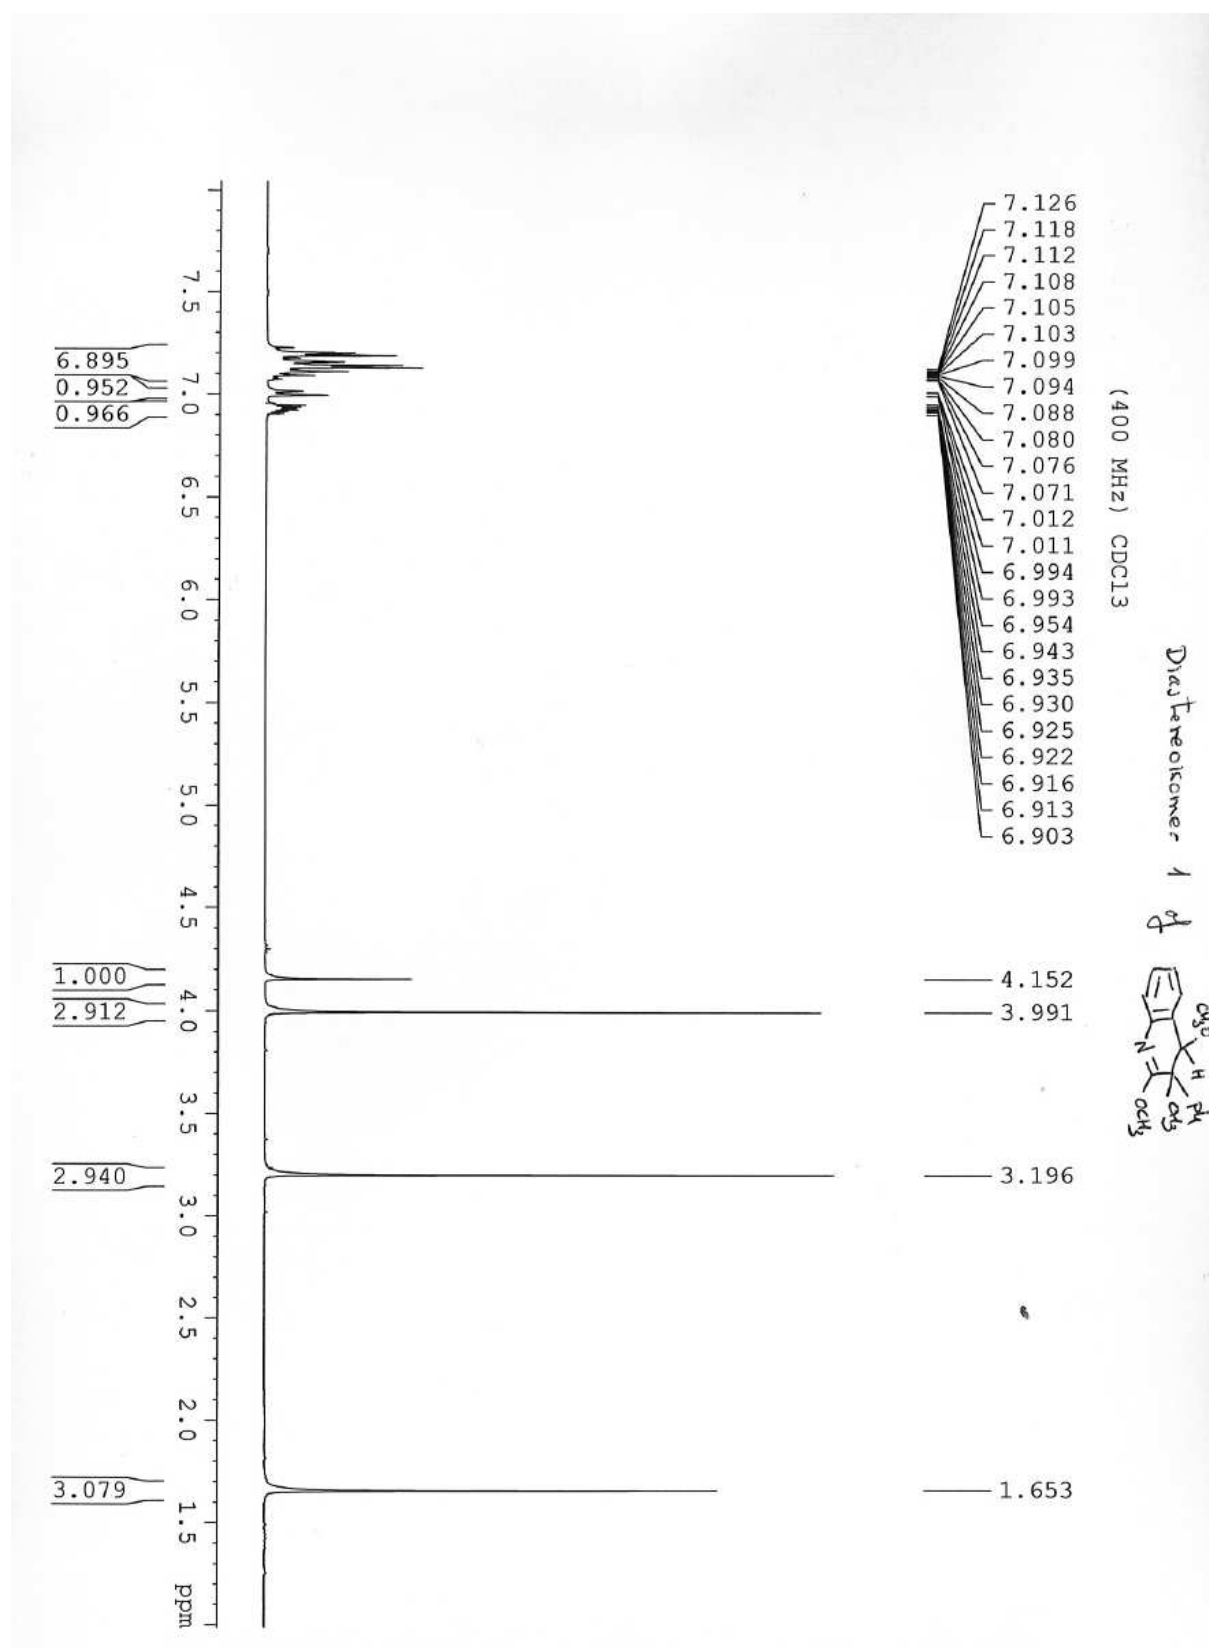

<sup>13</sup>C NMR of **diastereoisomer 1 of 13e**

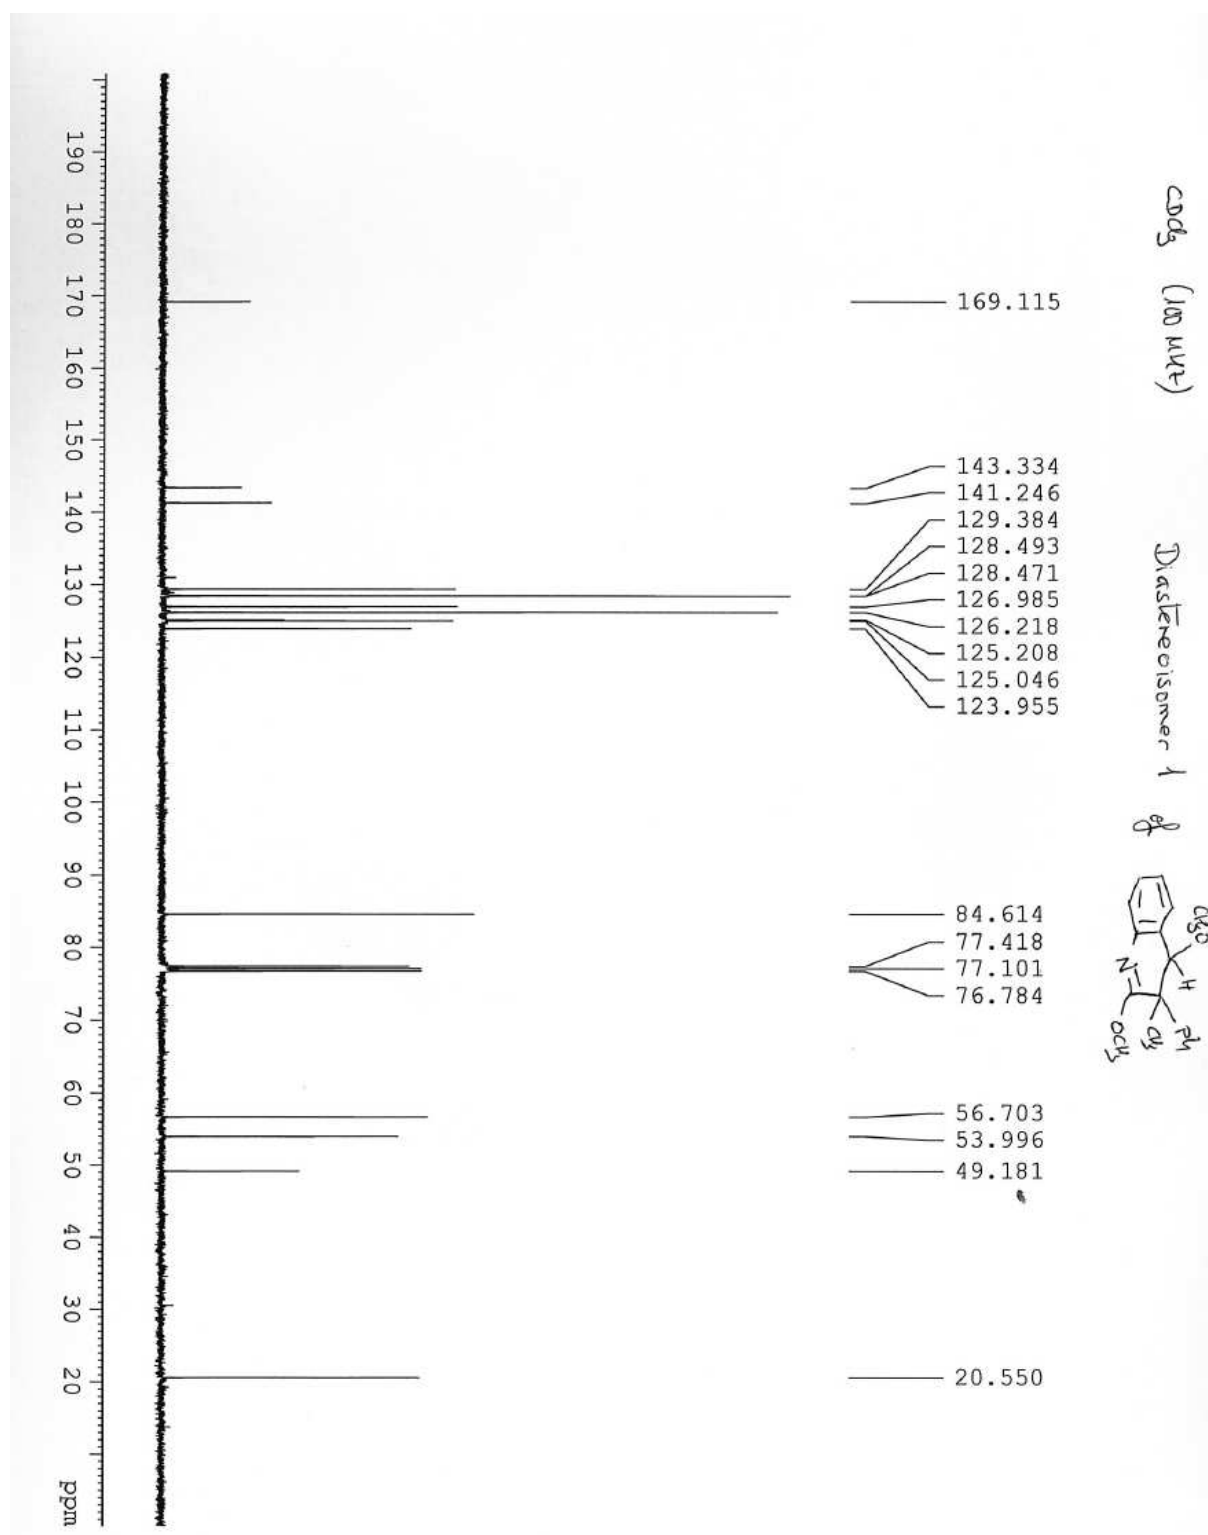

<sup>1</sup>H NMR of diastereoisomer 2 of 13e

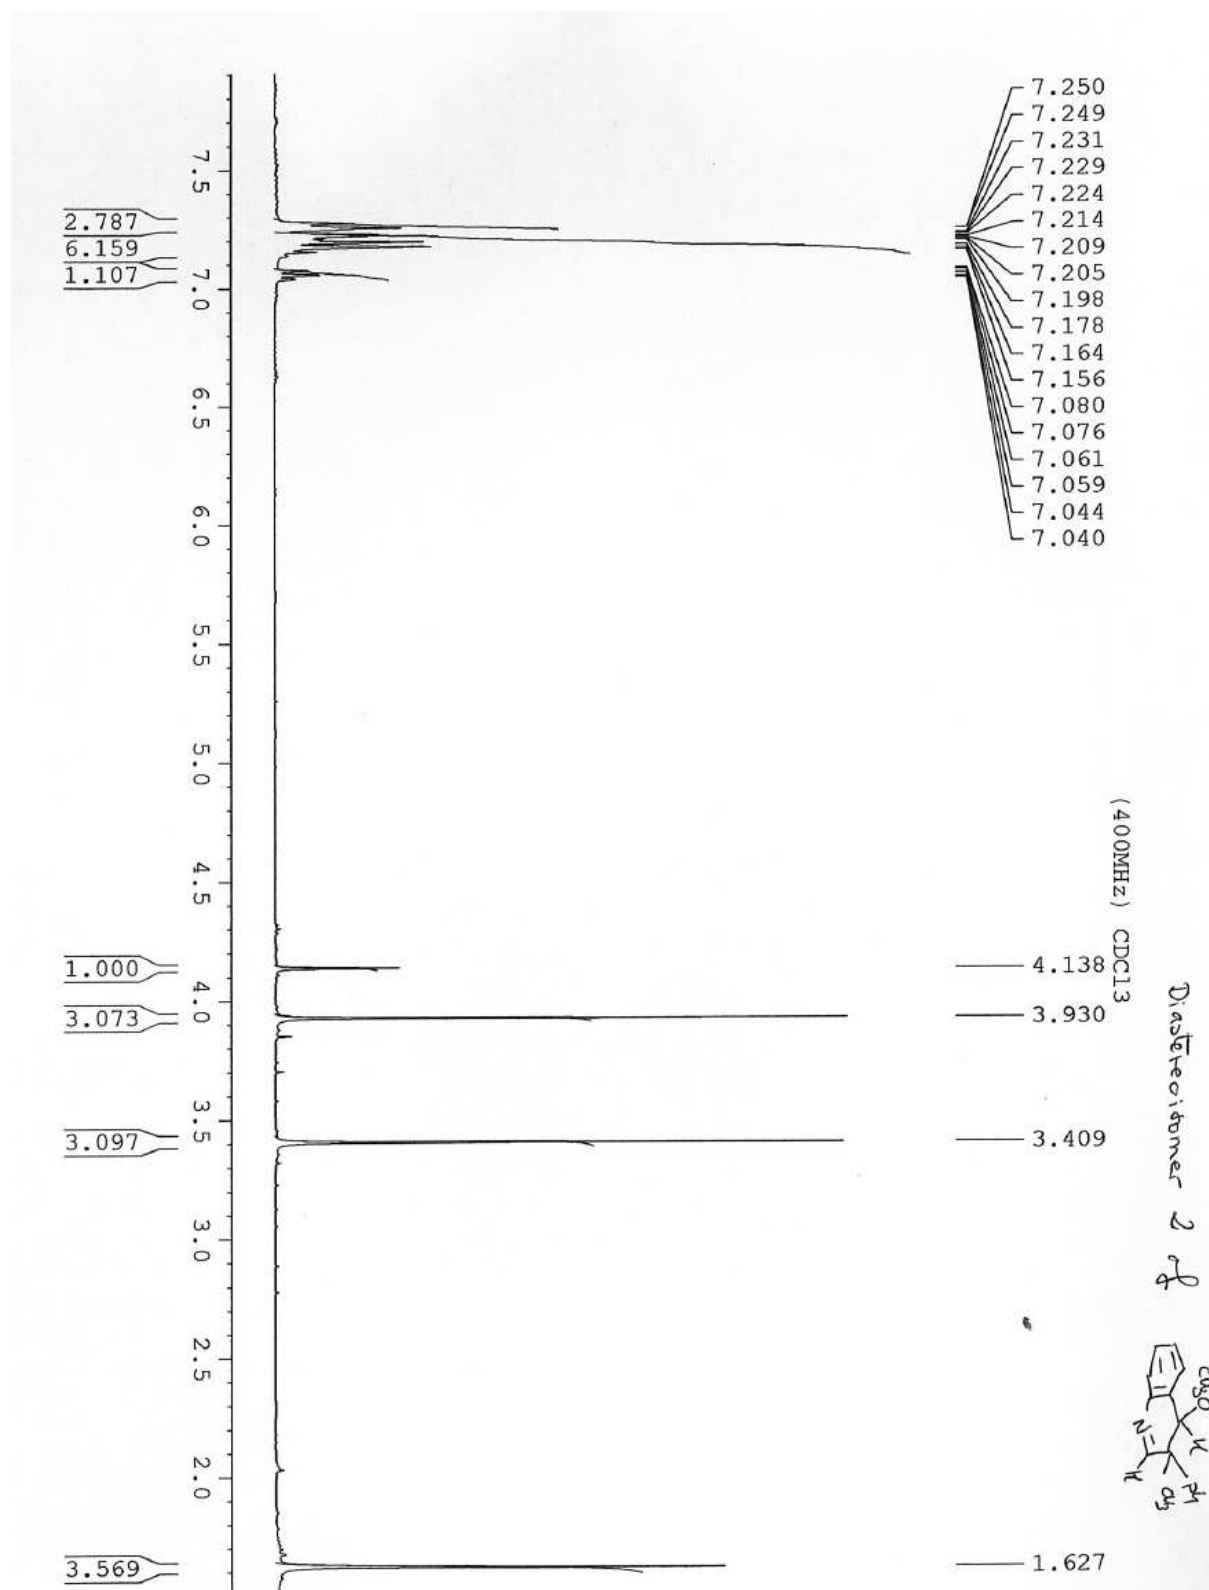

$^{13}\text{C}$  NMR of **diastereoisomer 2 of 13e**

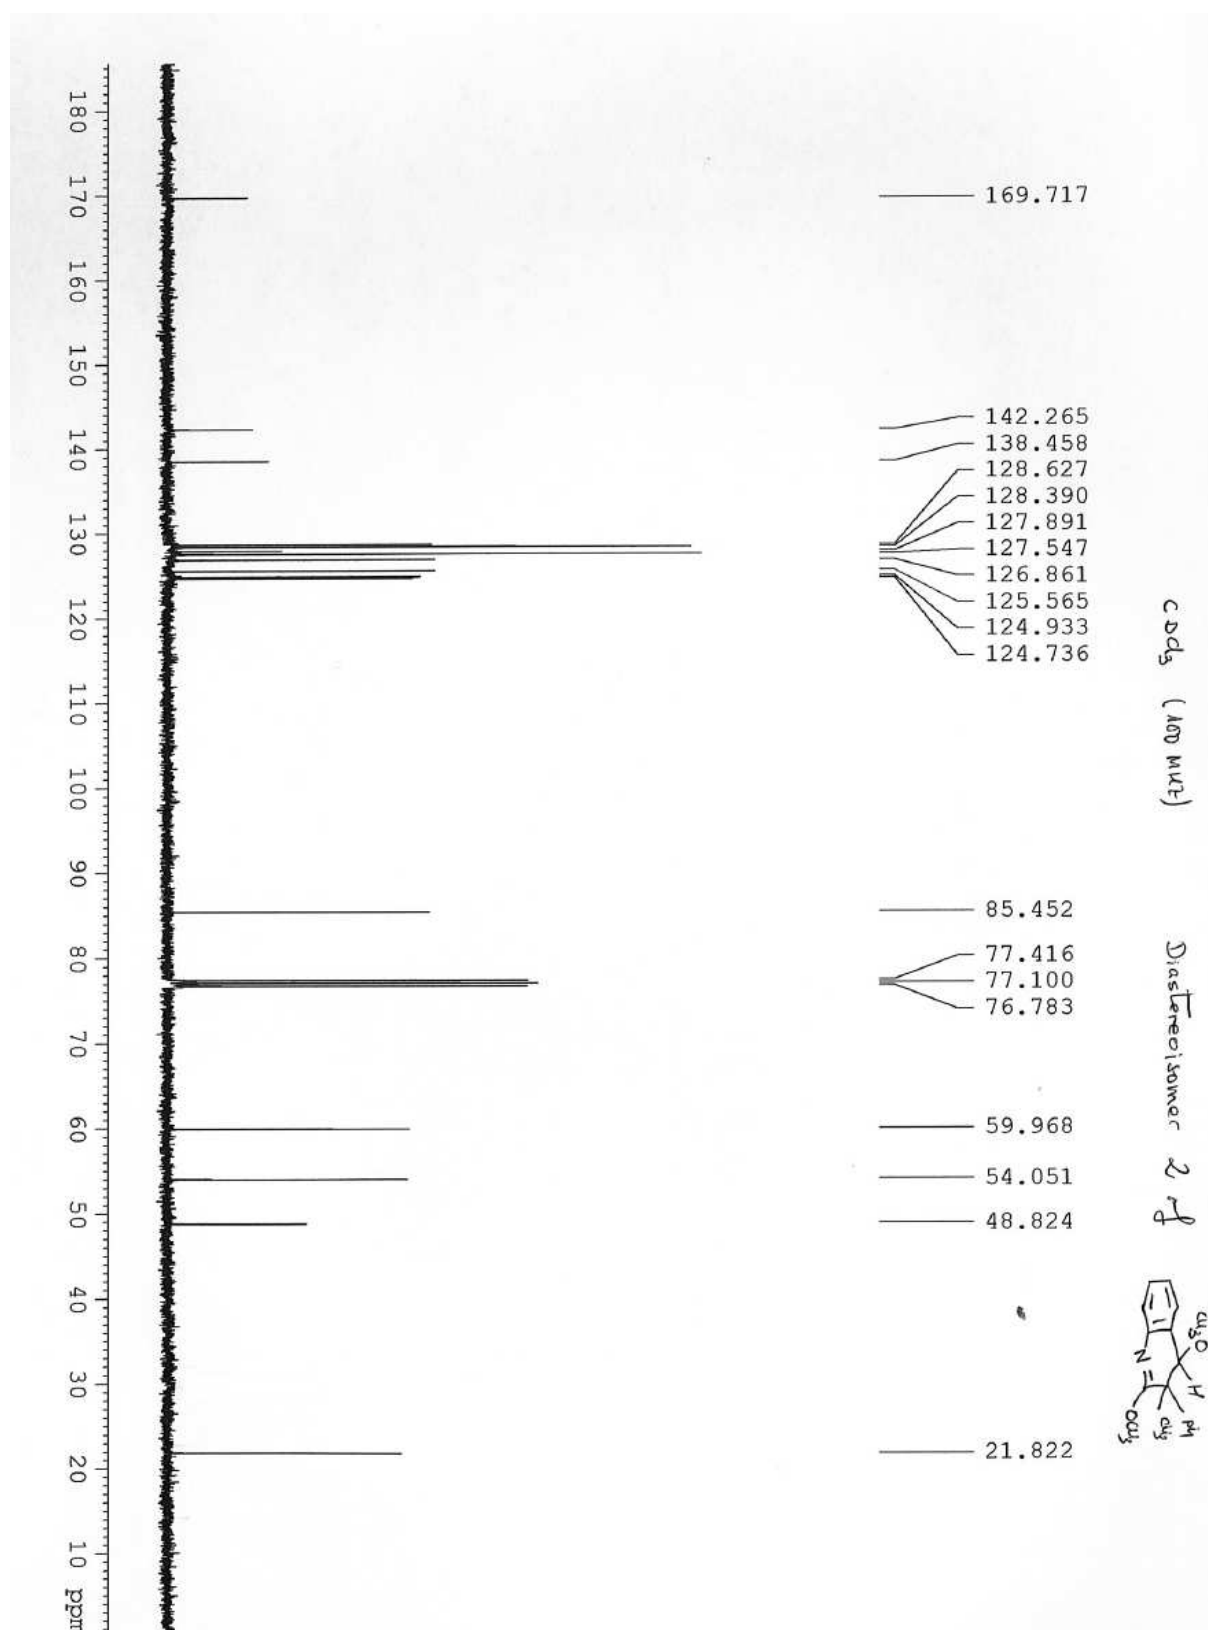

<sup>1</sup>H NMR of diastereoisomer 1 of 13f

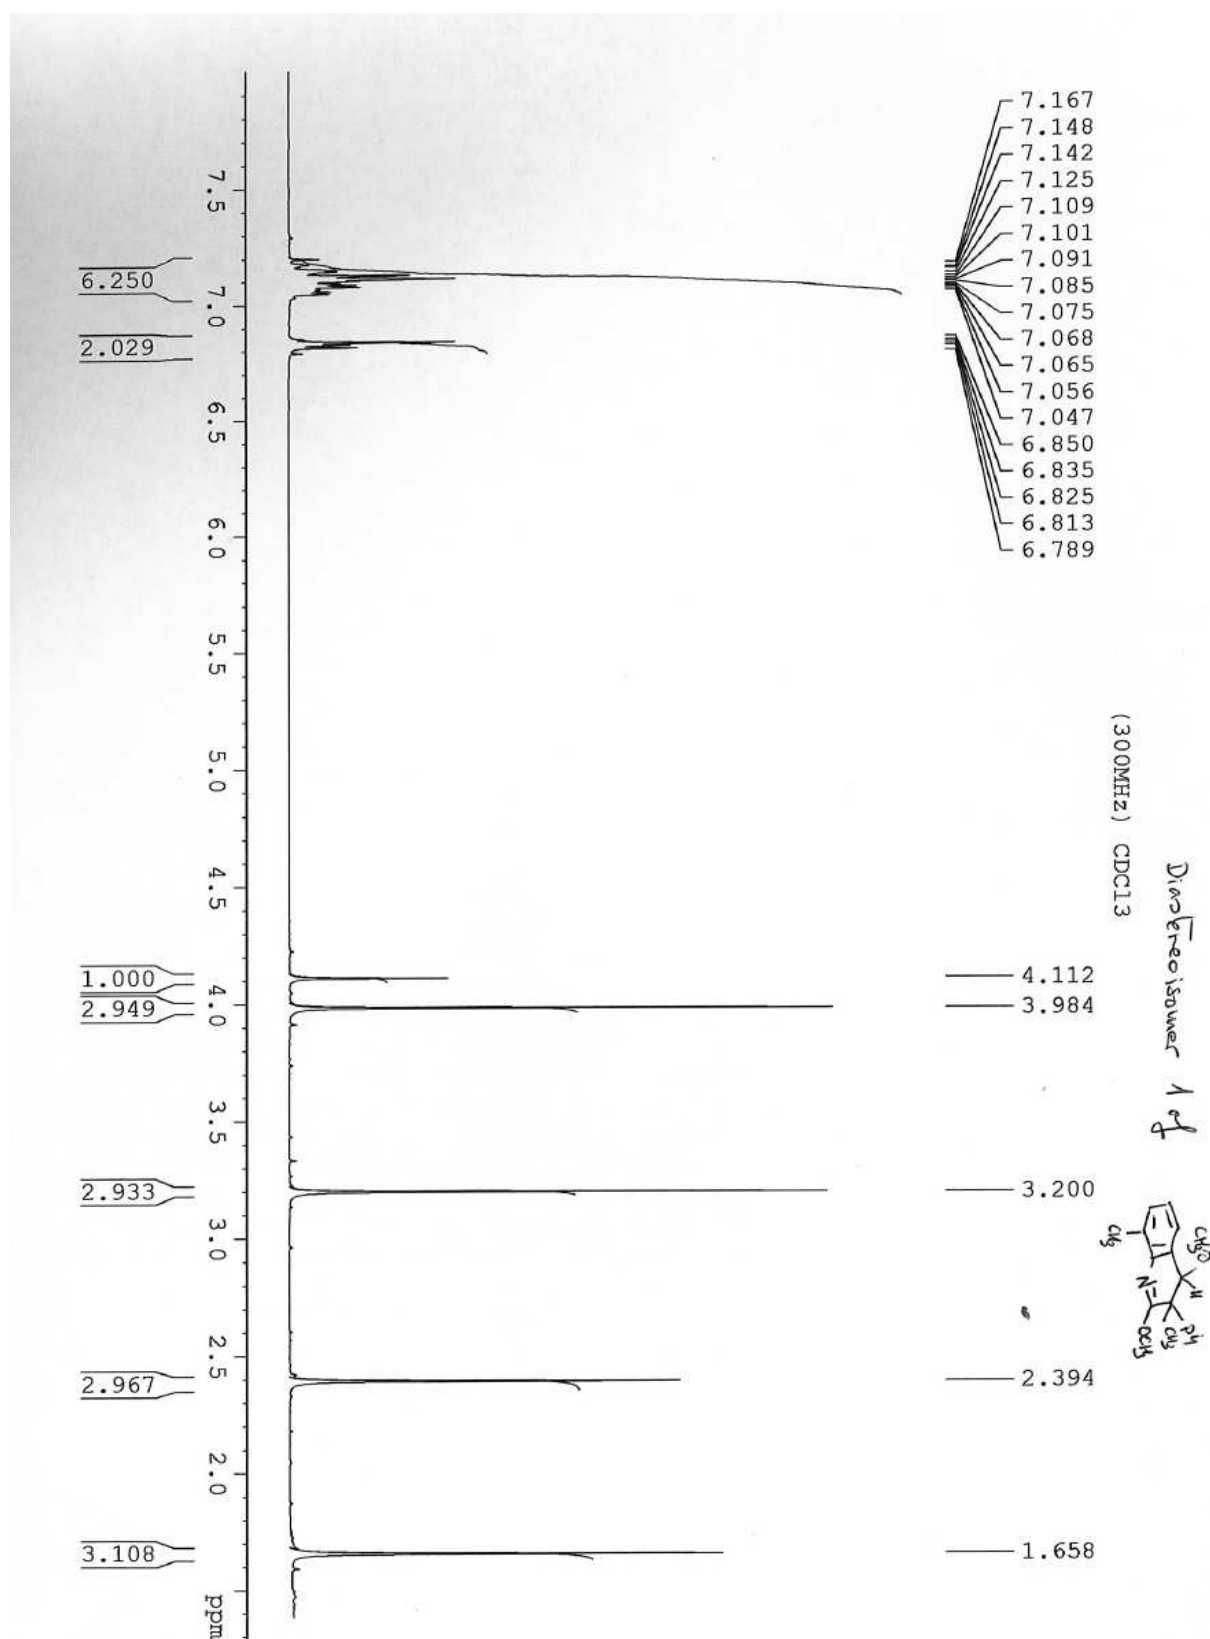

<sup>13</sup>C NMR of **diastereoisomer 1 of 13f**

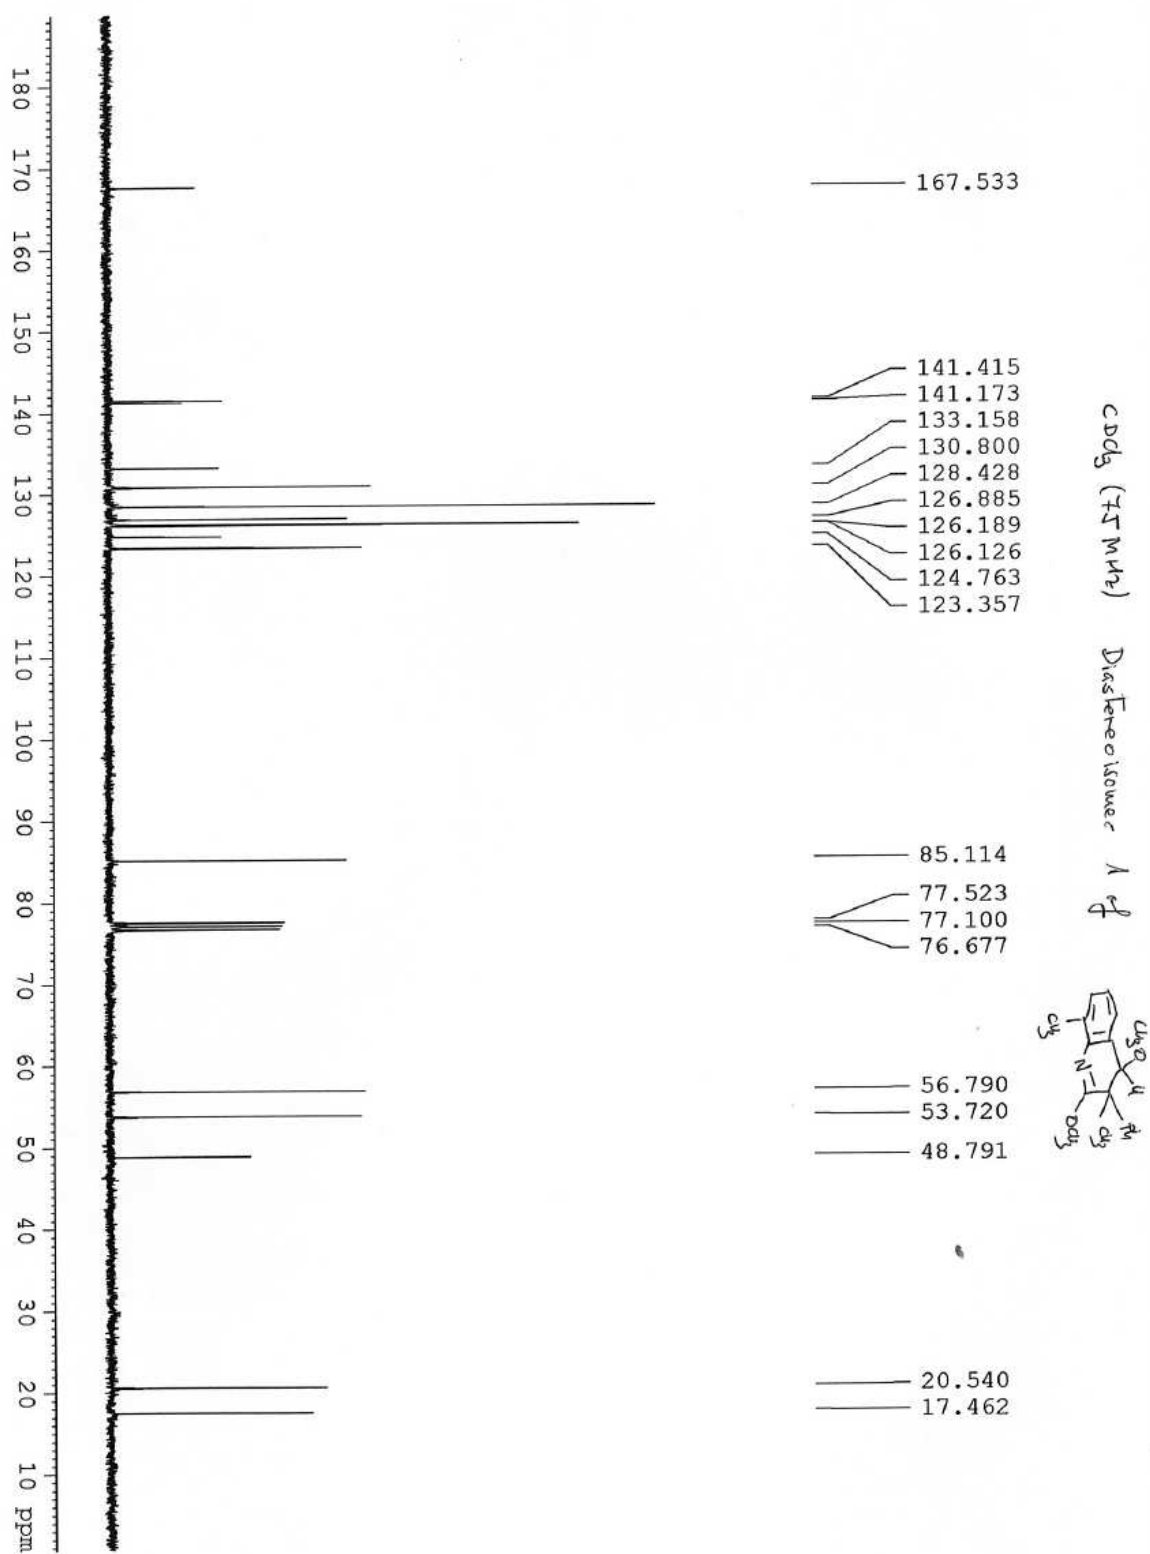



<sup>1</sup>H NMR of diastereoisomer 2 of 13f

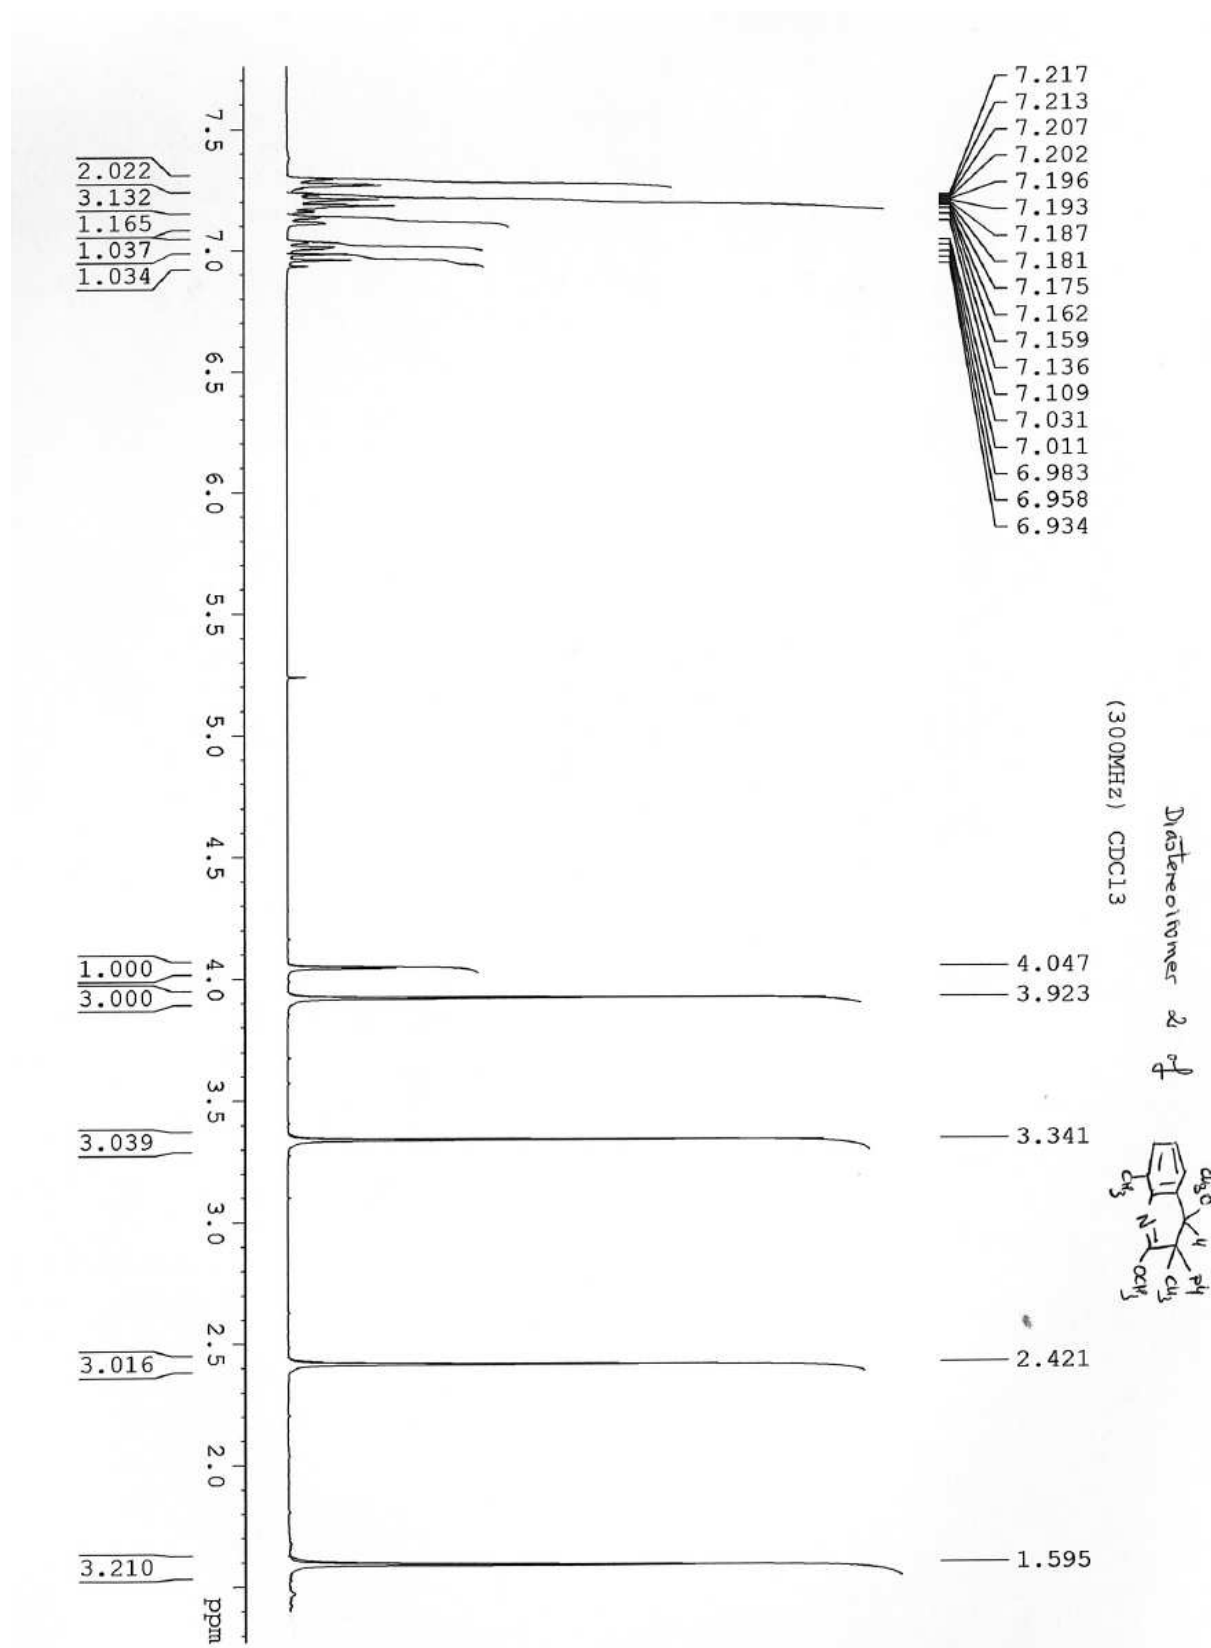

$^{13}\text{C}$  NMR of **diastereoisomer 2 of 13f**

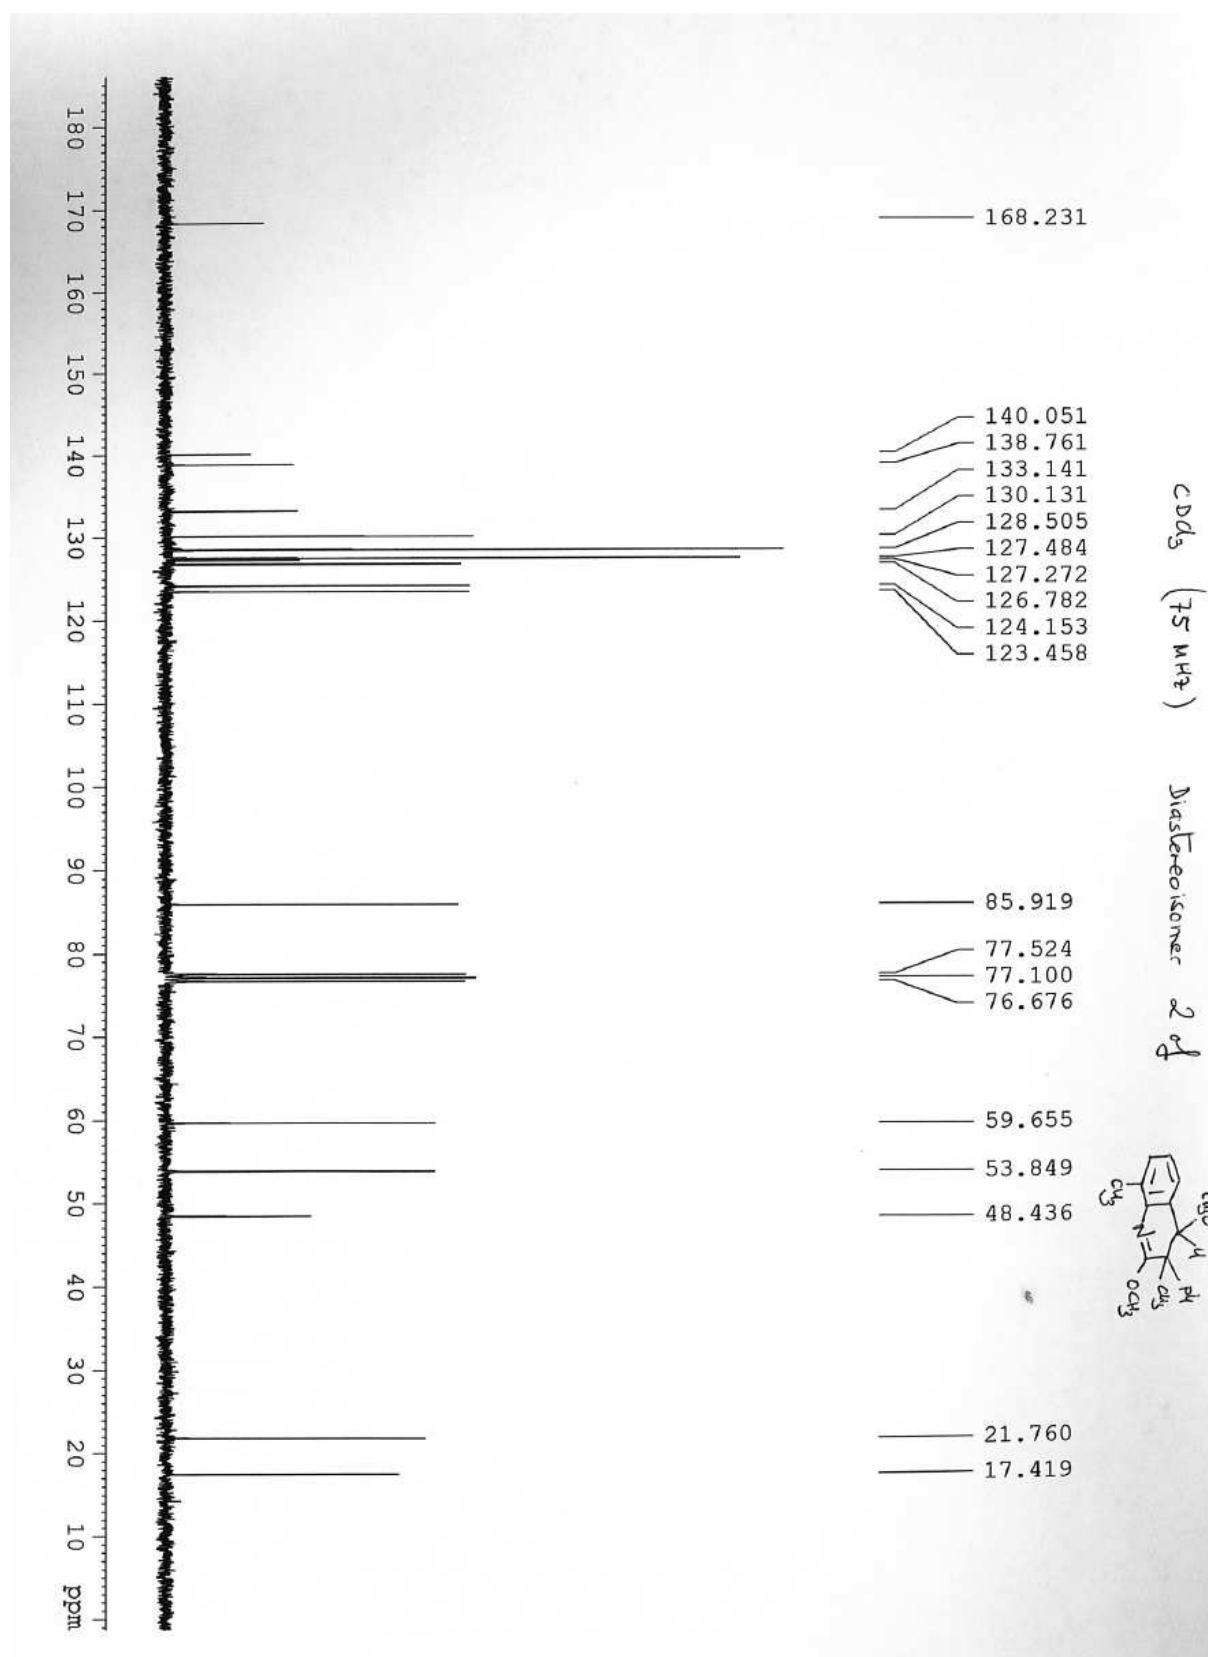

<sup>1</sup>H NMR of **17a**

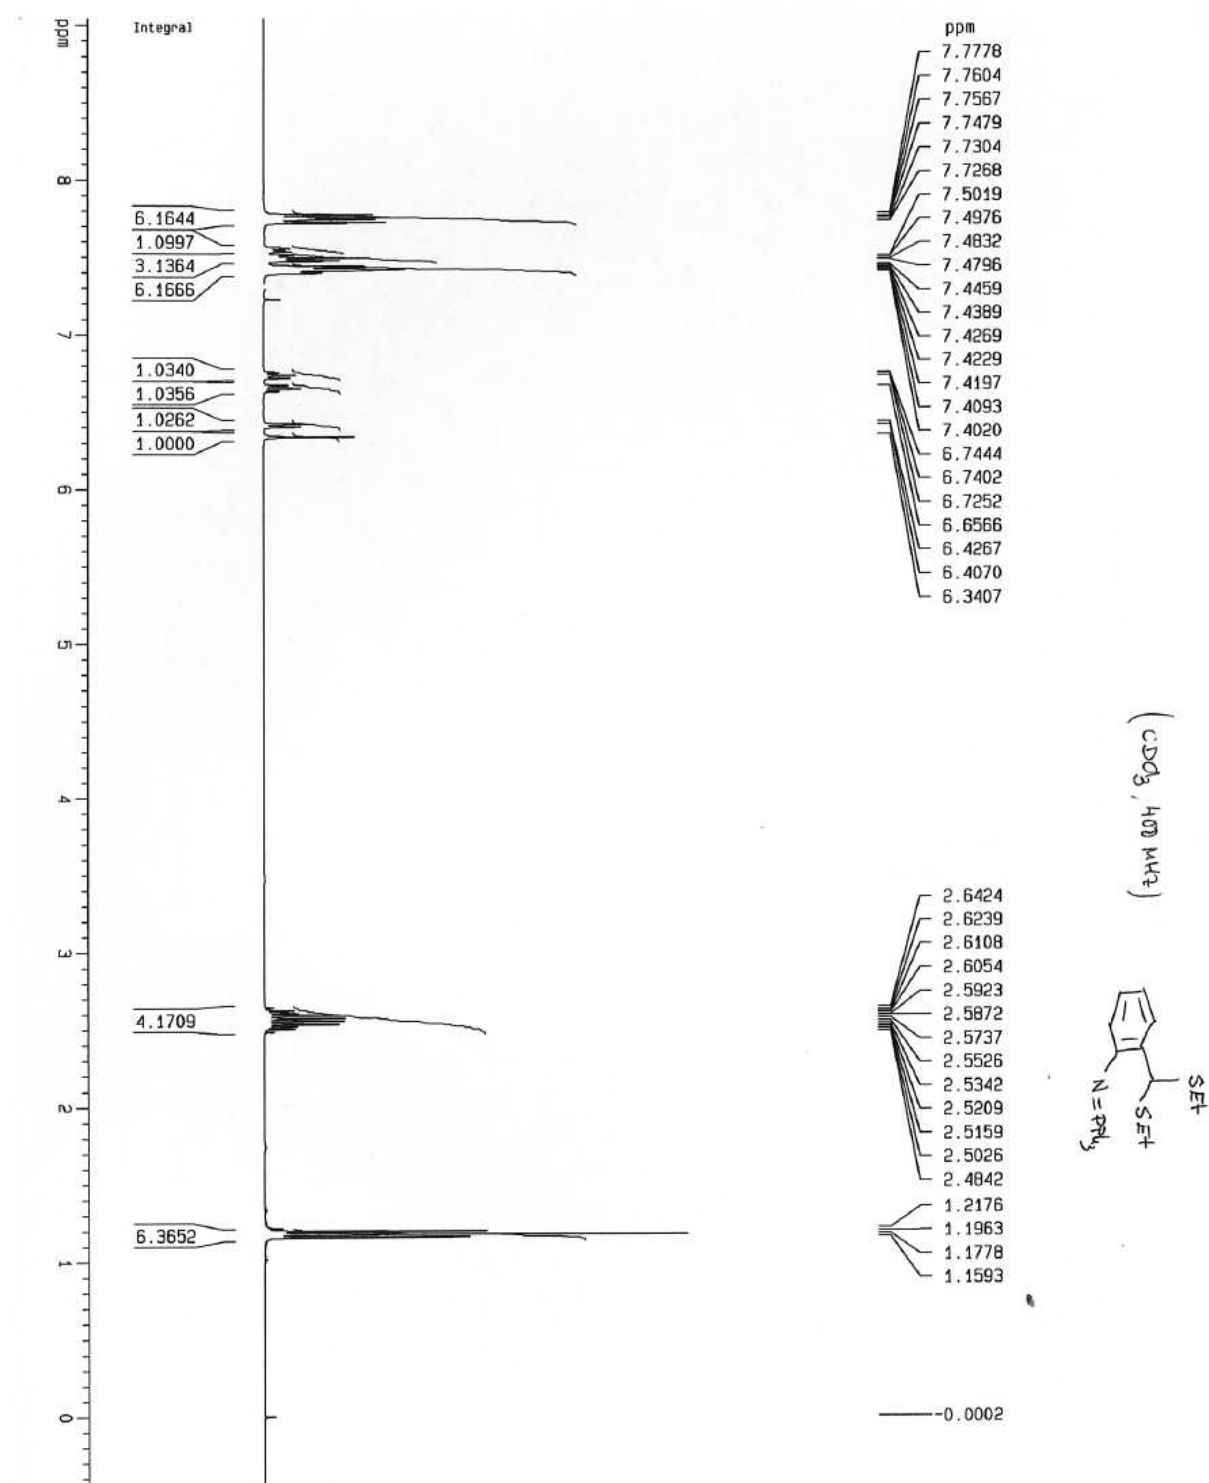

$^{13}\text{C}$  NMR of **17a**

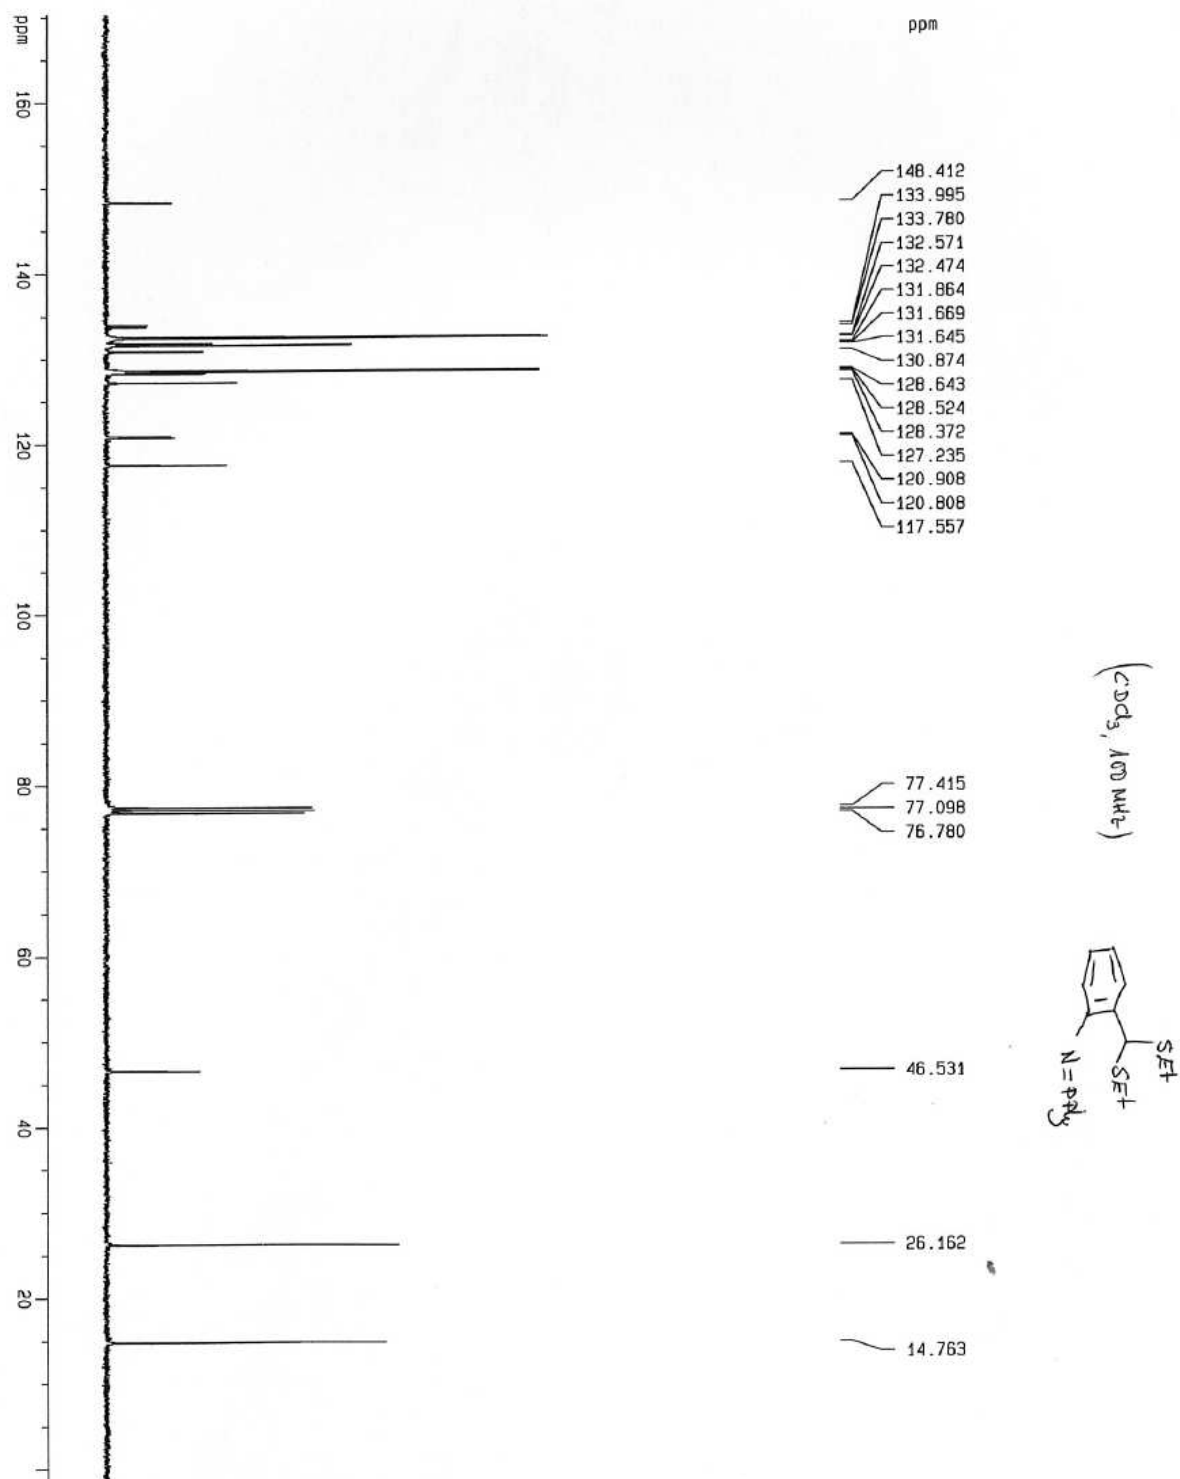

<sup>31</sup>P NMR of **17a**

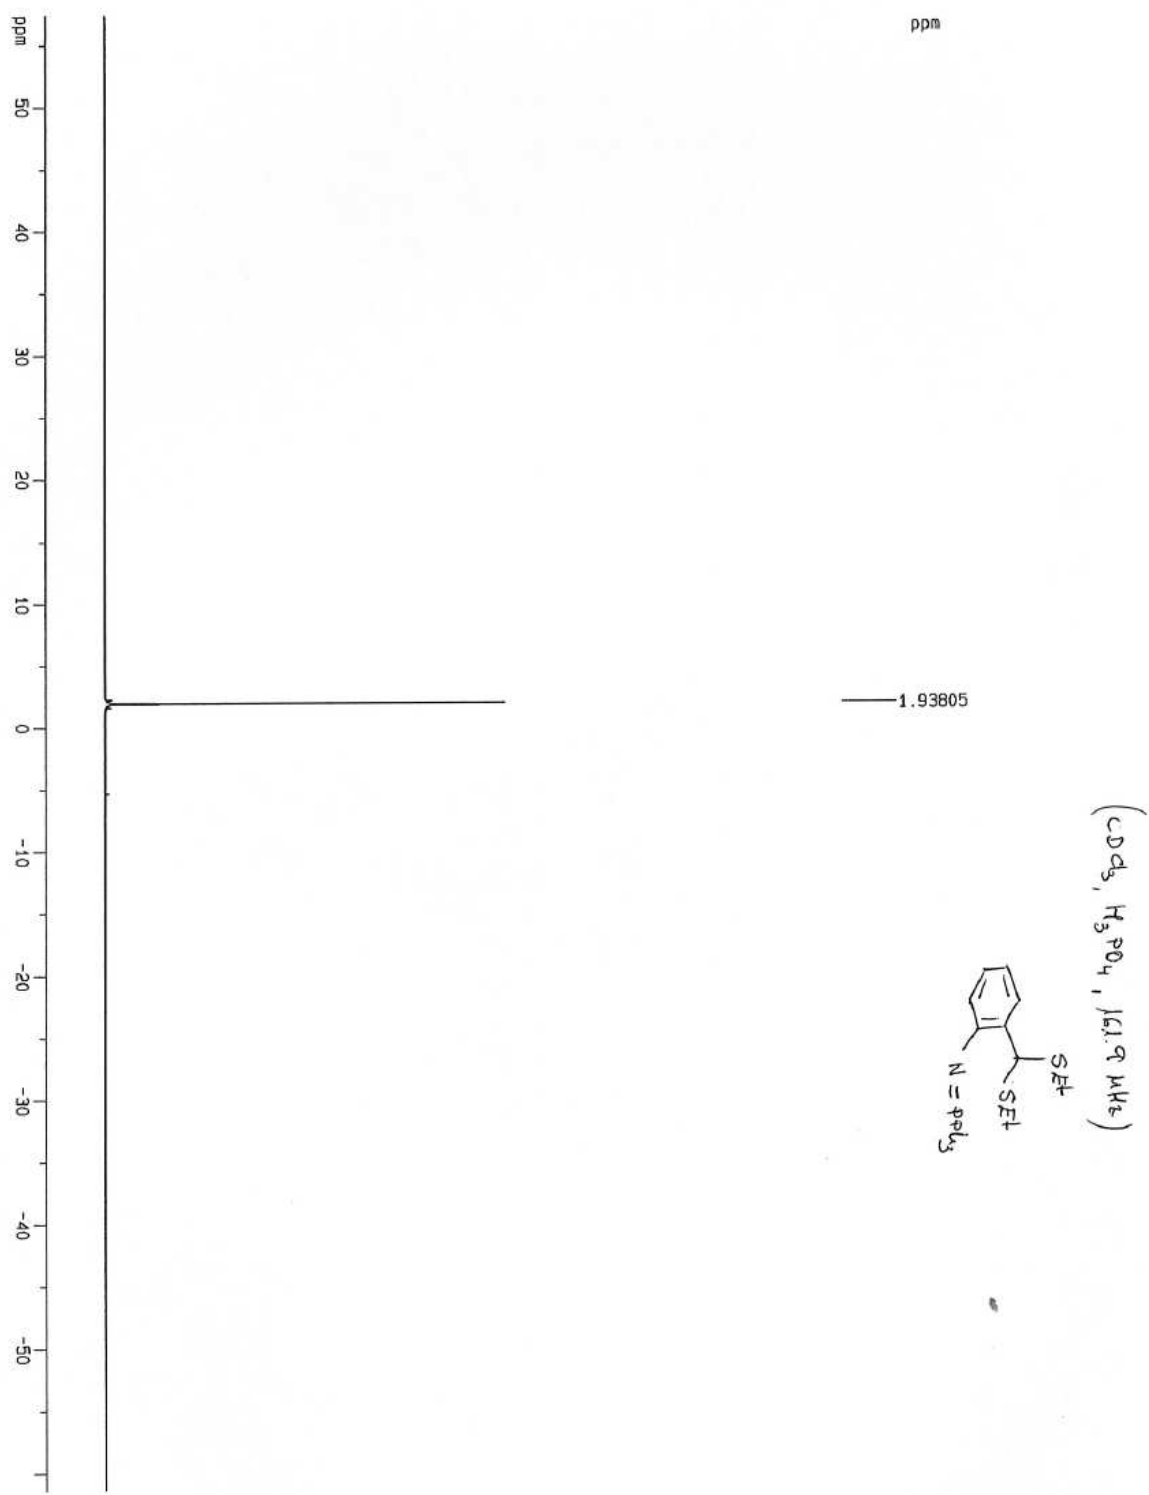

<sup>1</sup>H NMR of **17b**

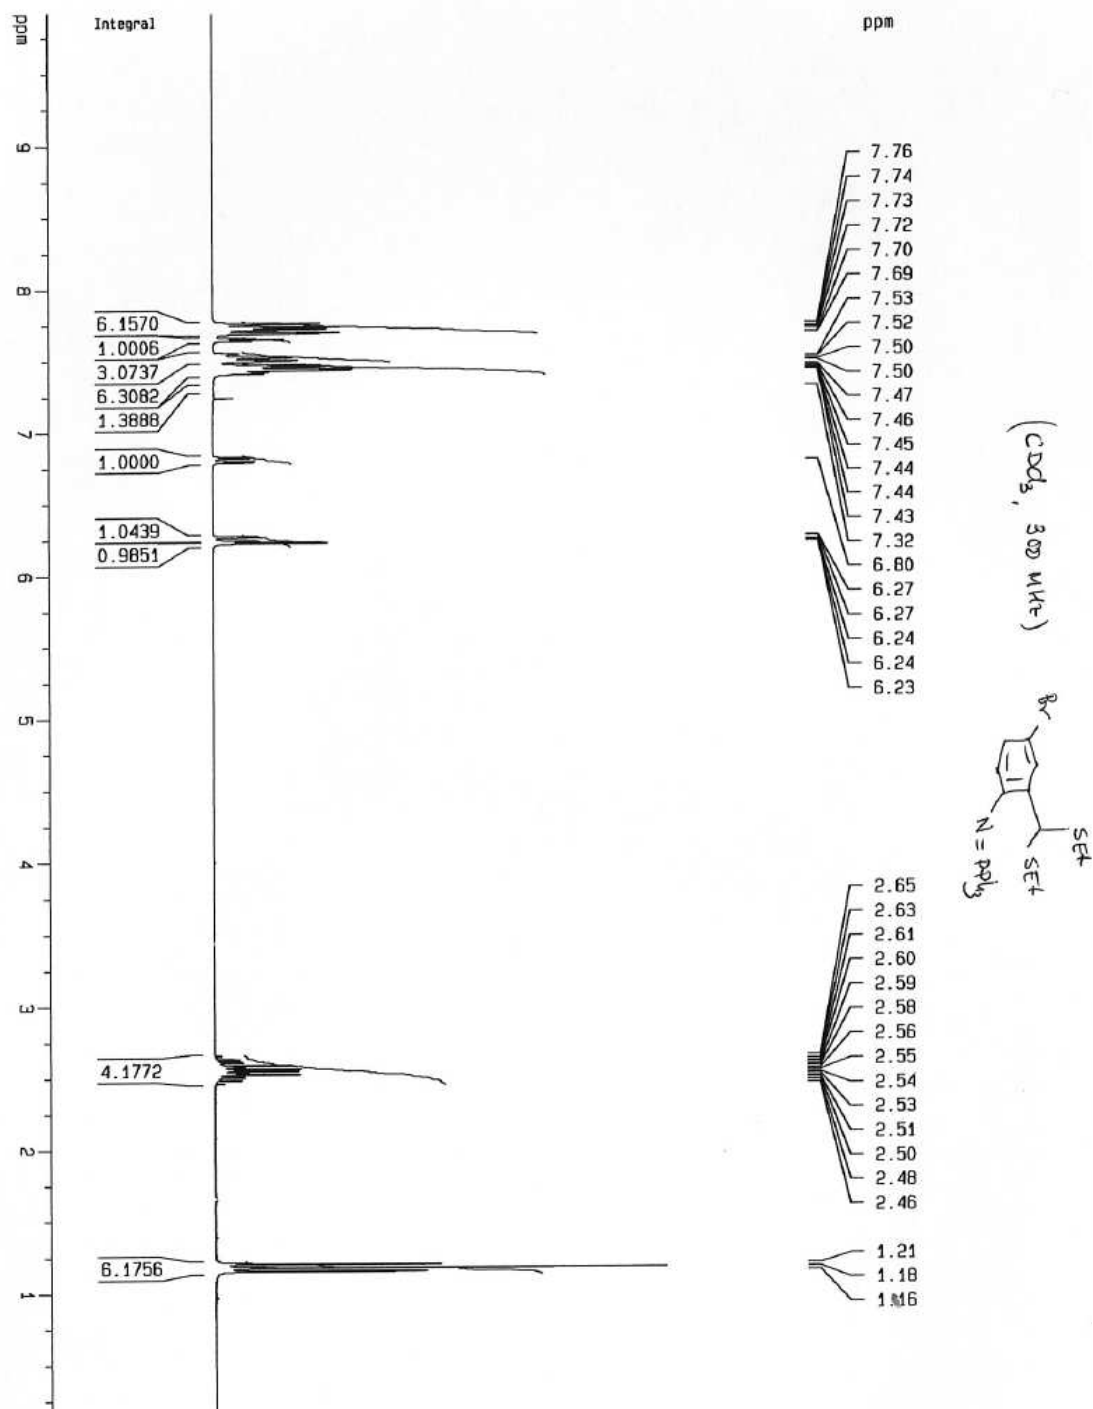

$^{13}\text{C}$  NMR of **17b**

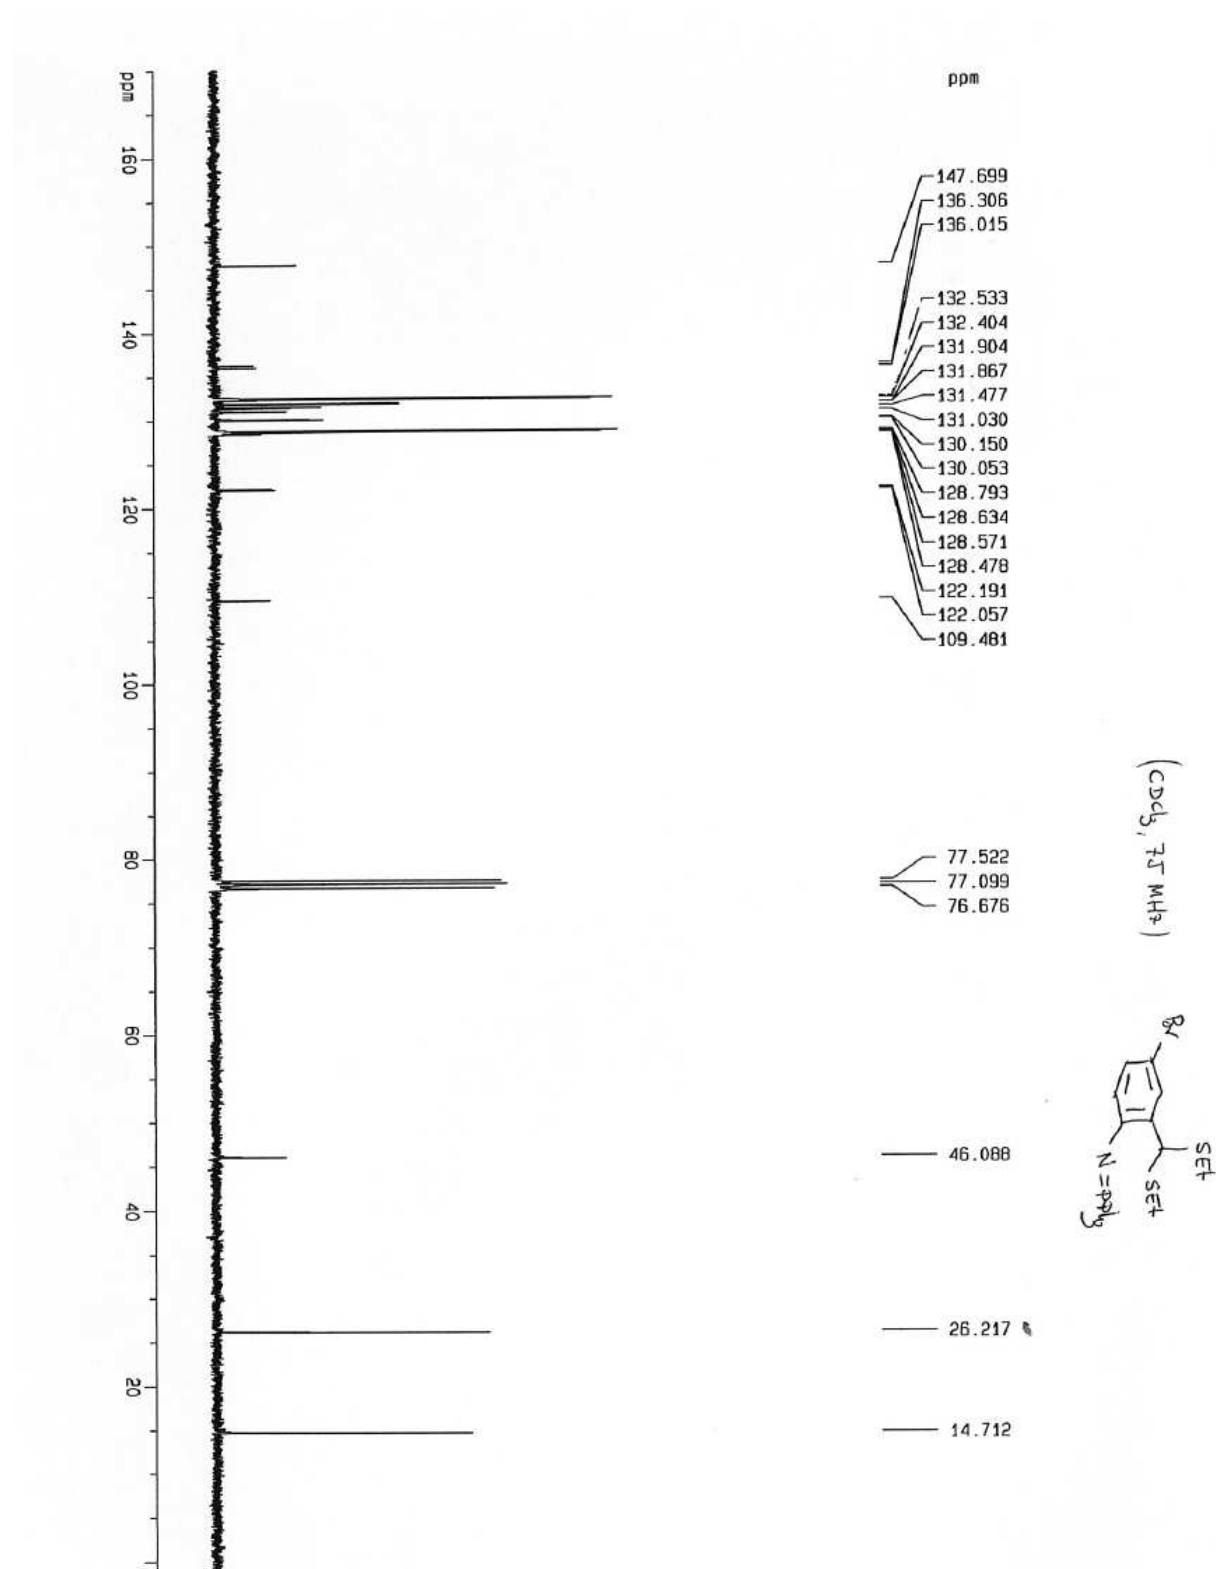

<sup>31</sup>P NMR of **17b**

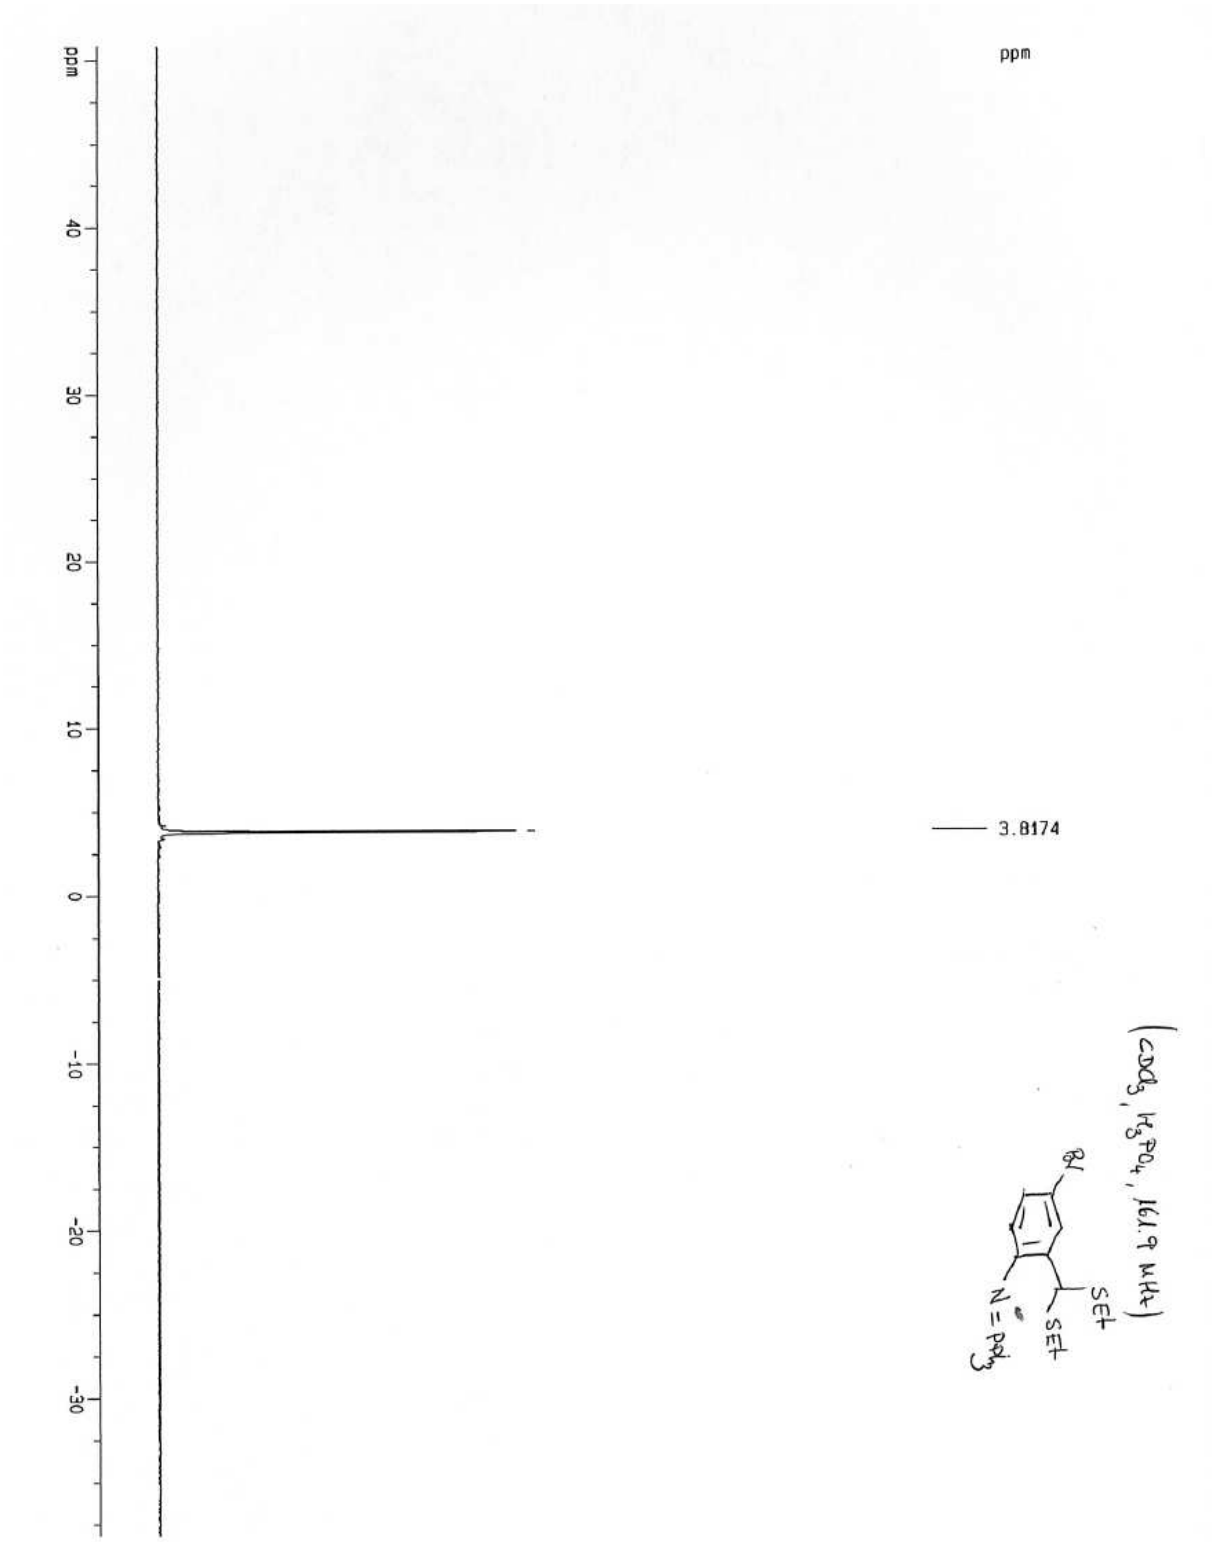



<sup>1</sup>H NMR of **17c**

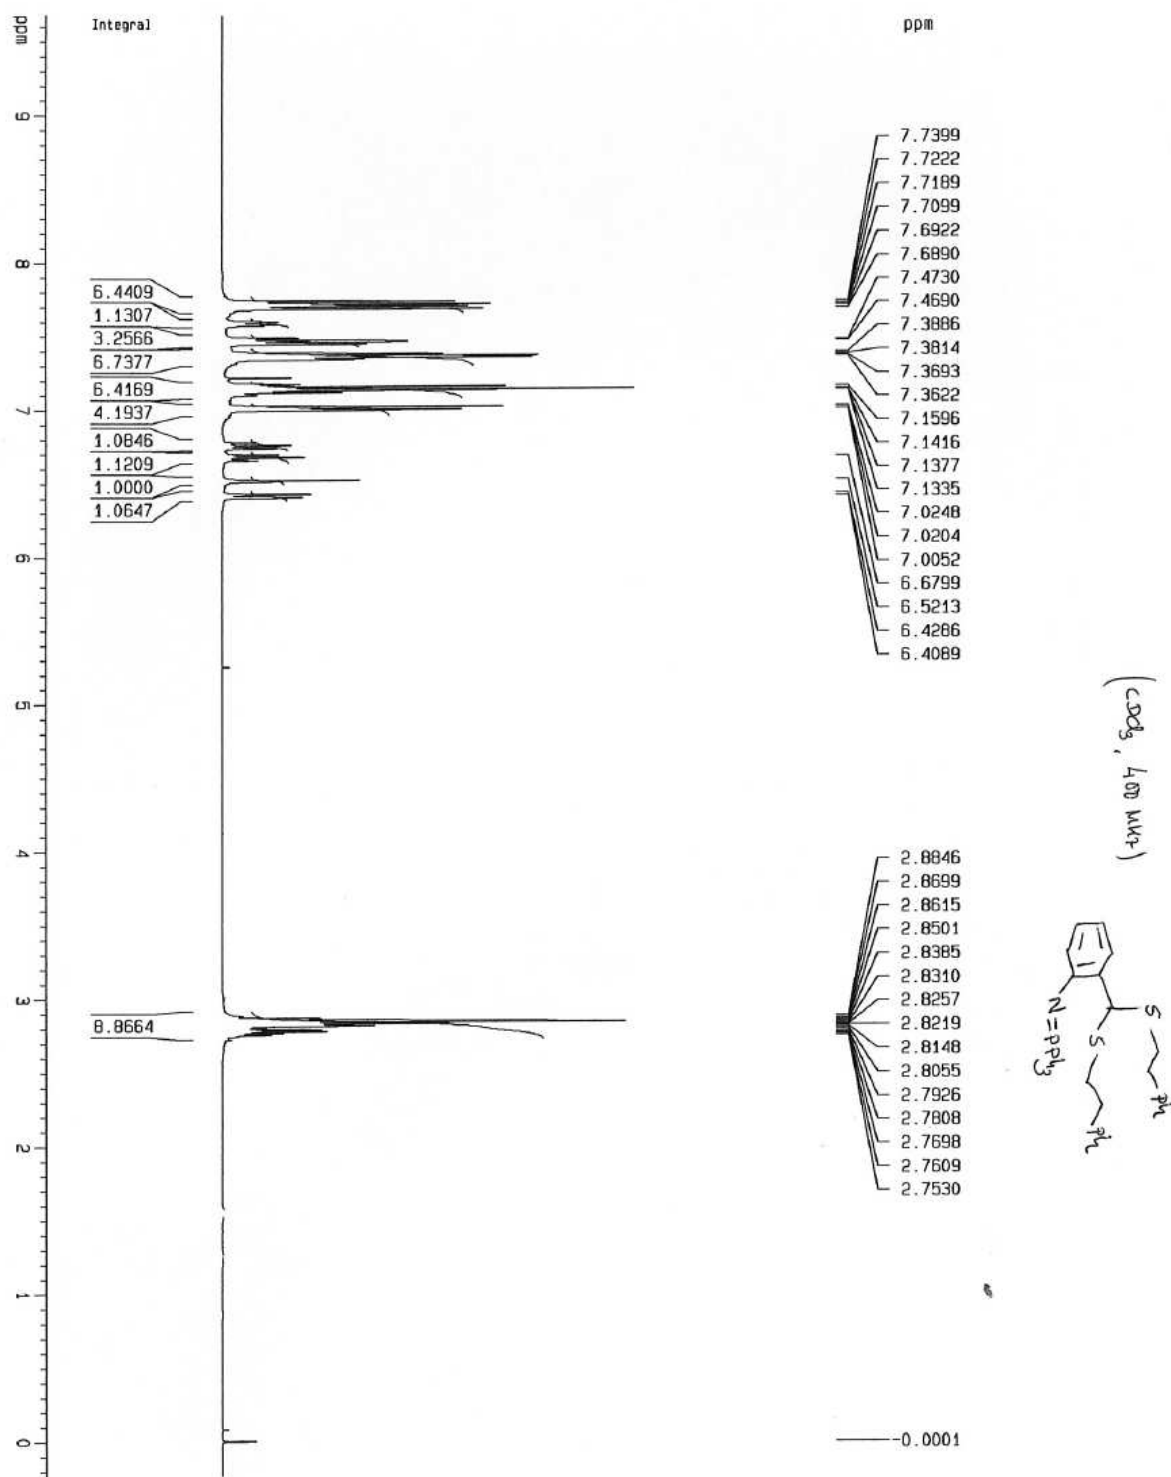

$^{13}\text{C}$  NMR of **17c**

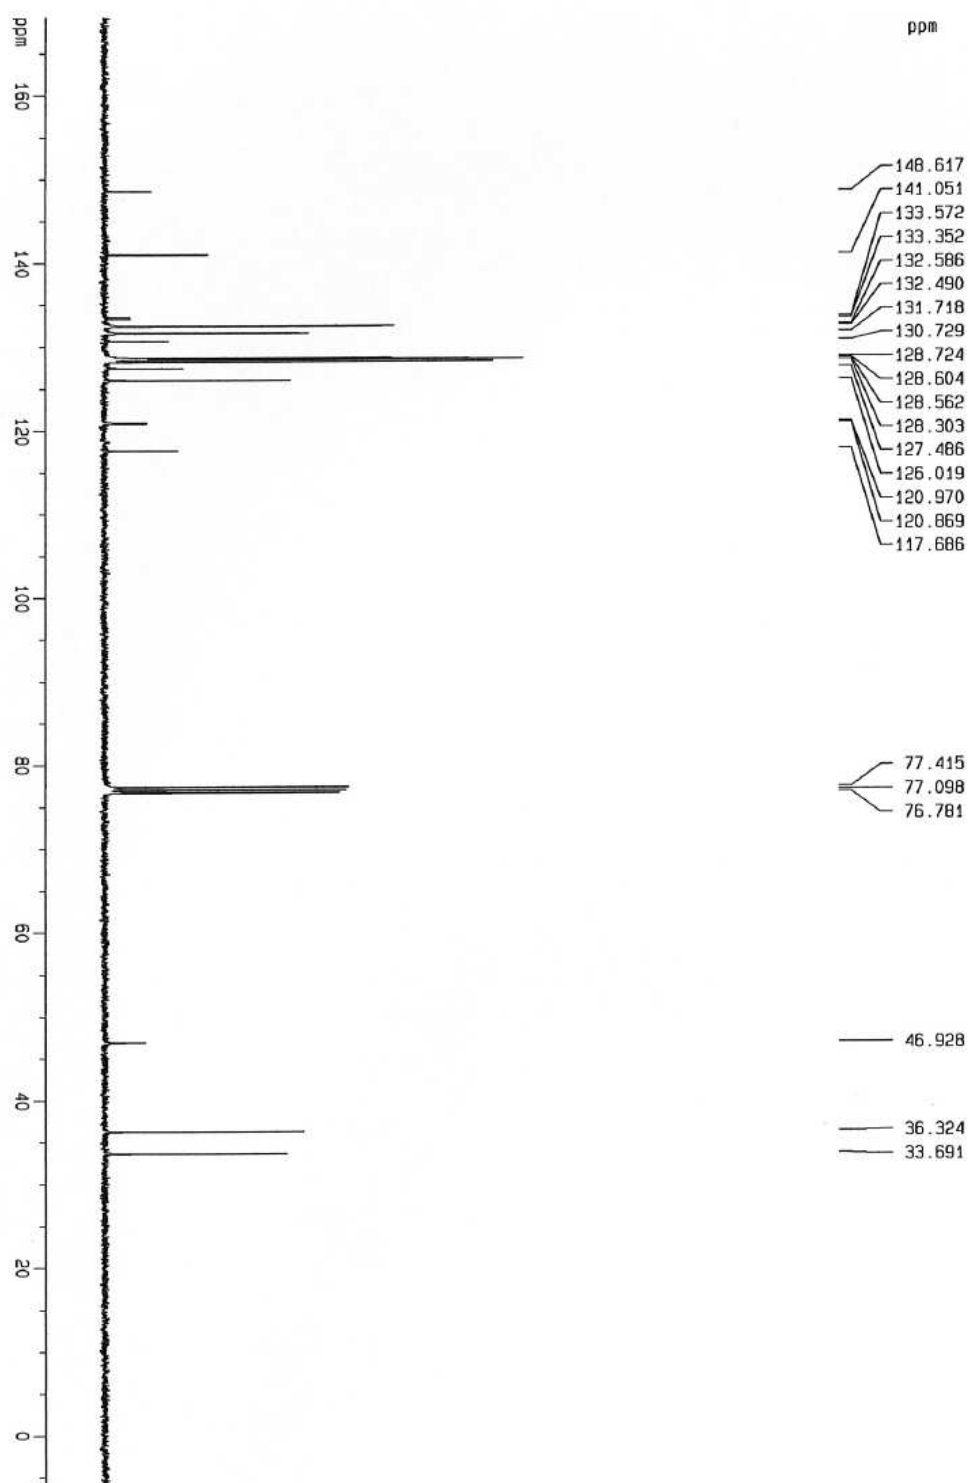

( $\text{CDCl}_3$ , 100 MHz)

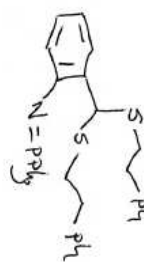

<sup>31</sup>P NMR of **17c**

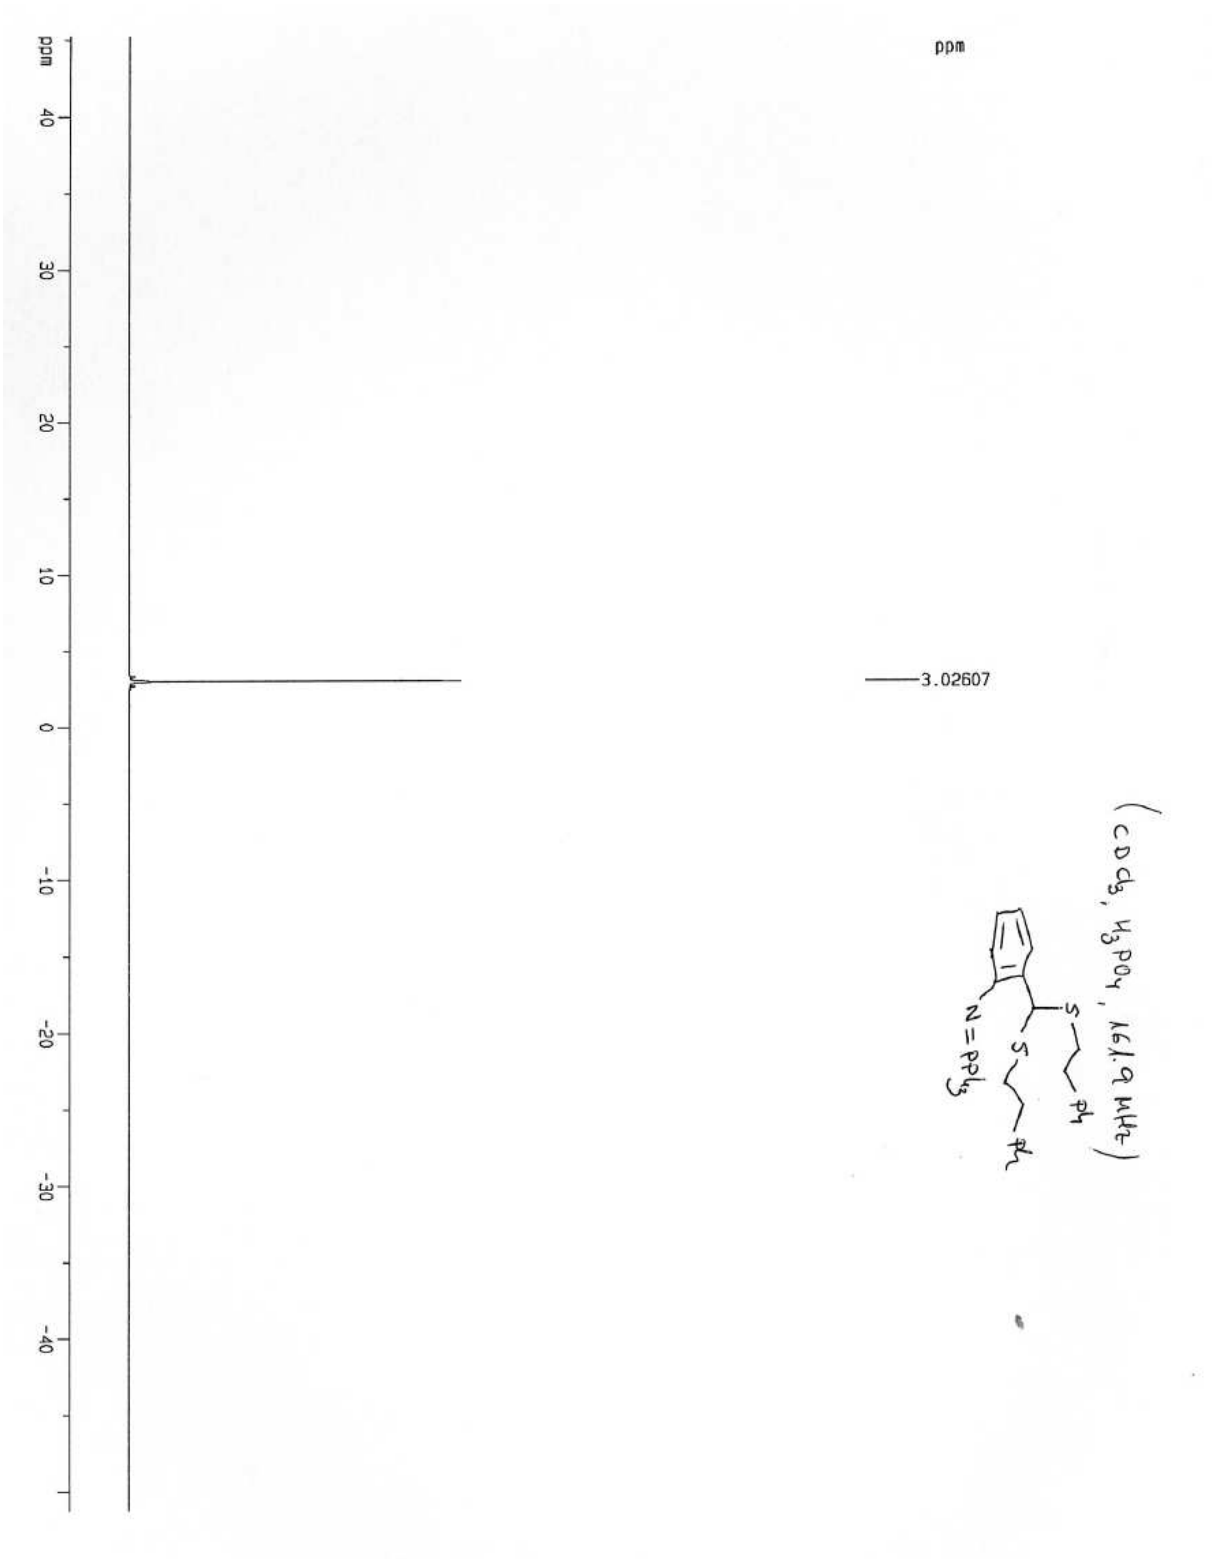

<sup>1</sup>H NMR of 20a

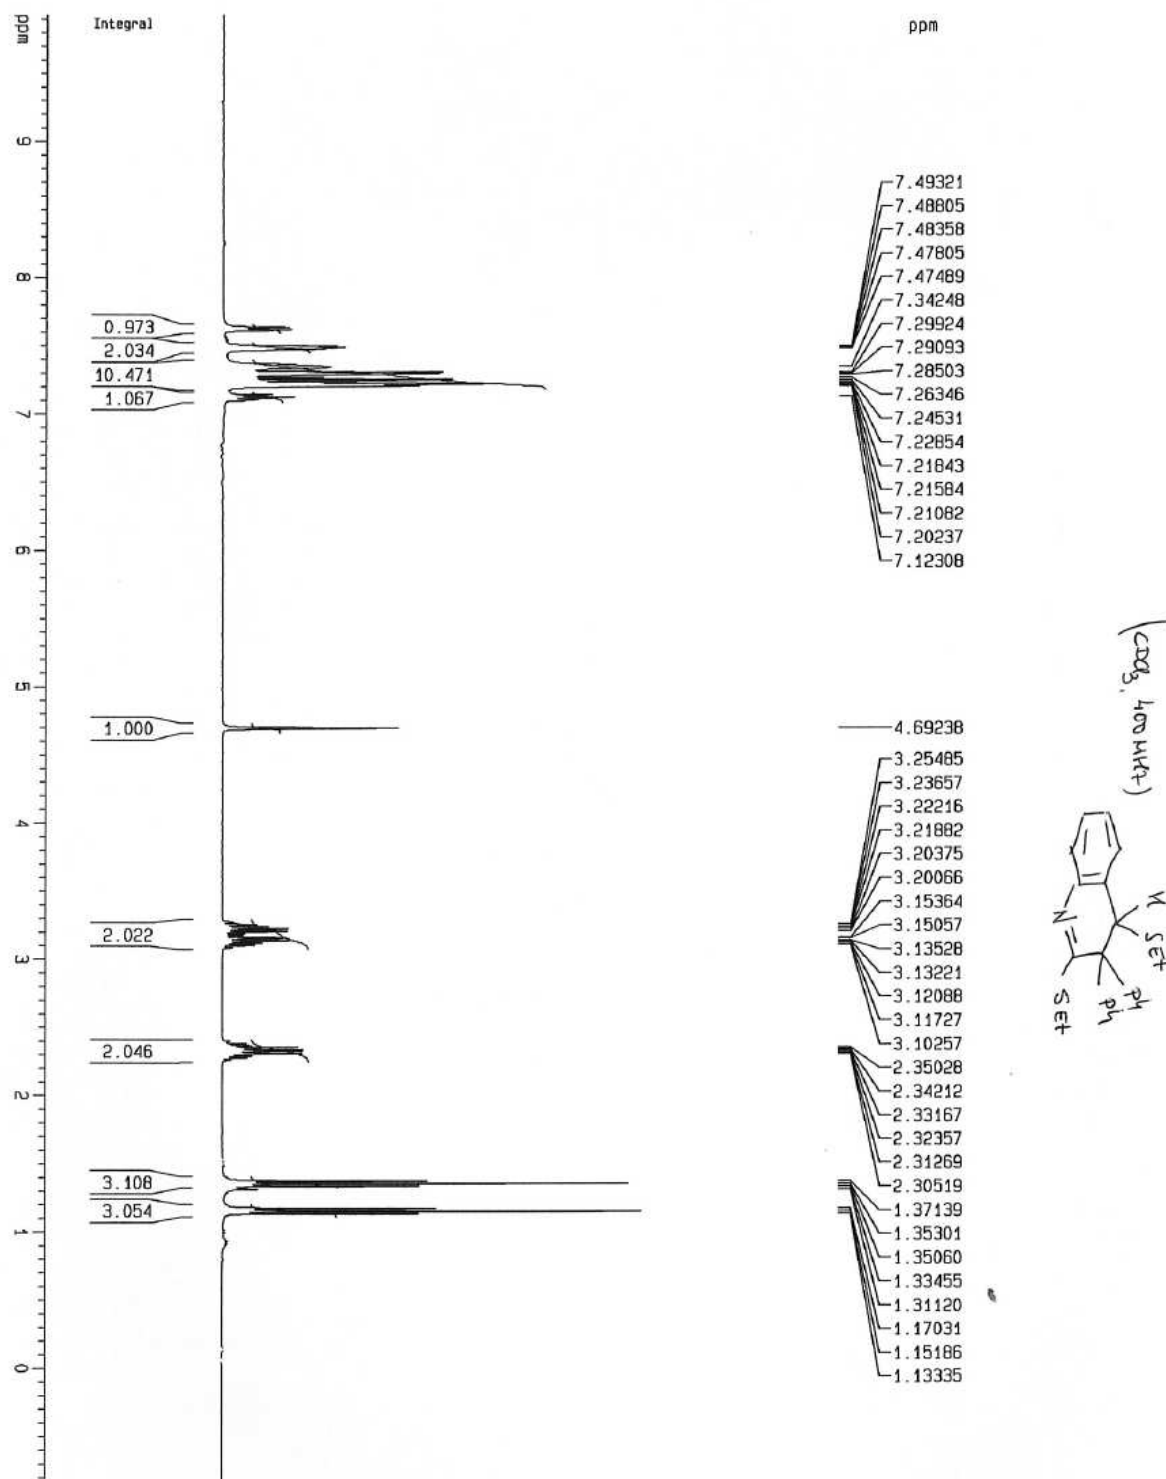

$^{13}\text{C}$  NMR of **20a**

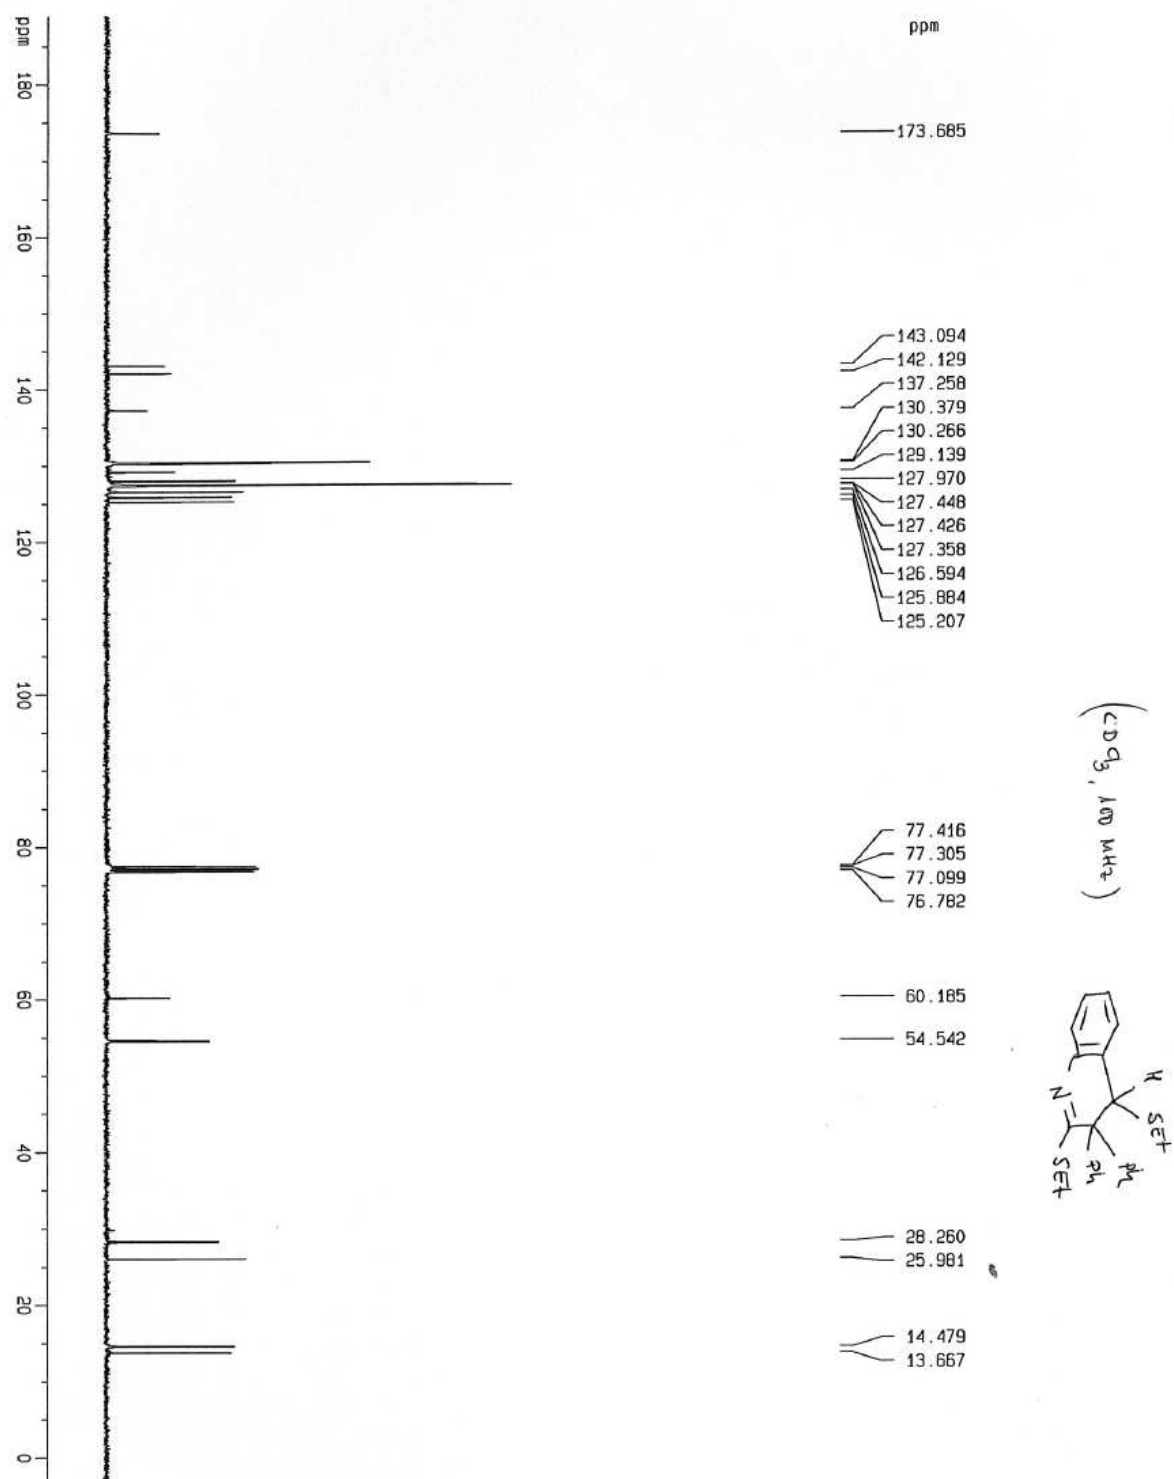

<sup>1</sup>H NMR of **20b**

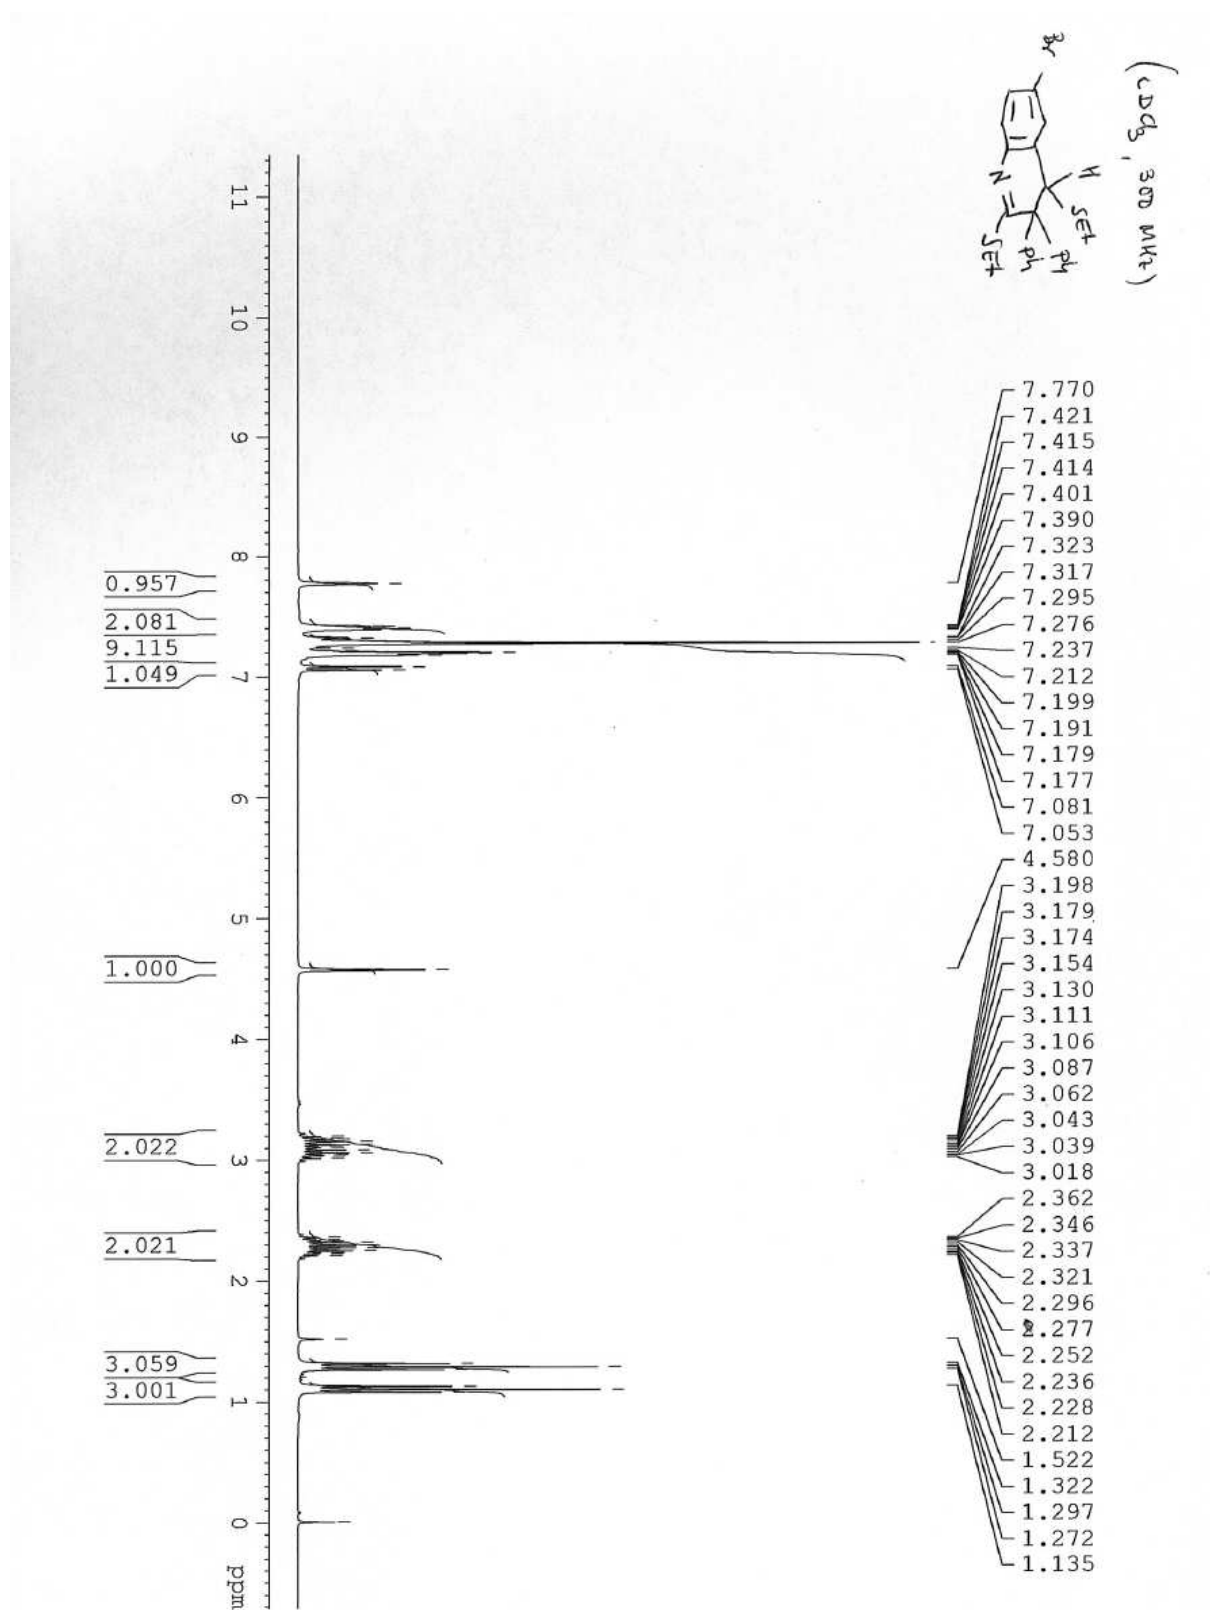

$^{13}\text{C}$  NMR of **20b**

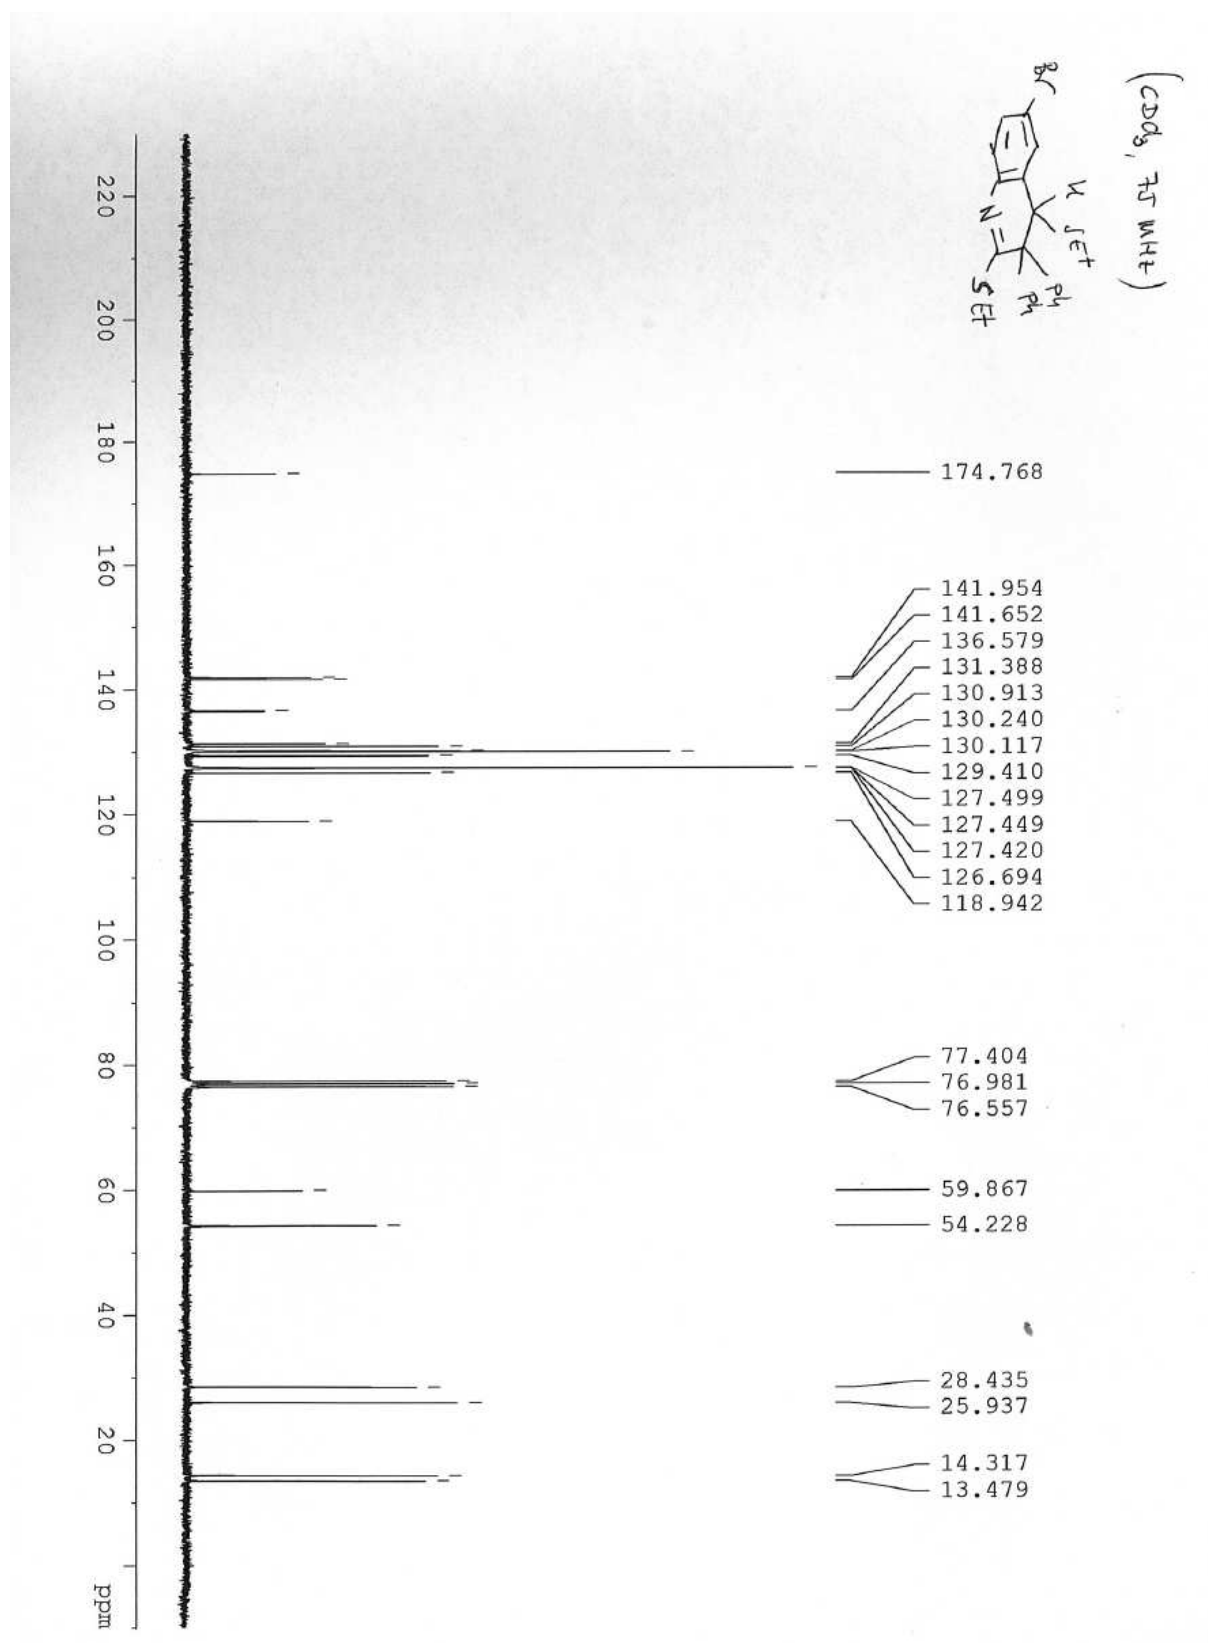

<sup>1</sup>H NMR of **20c**

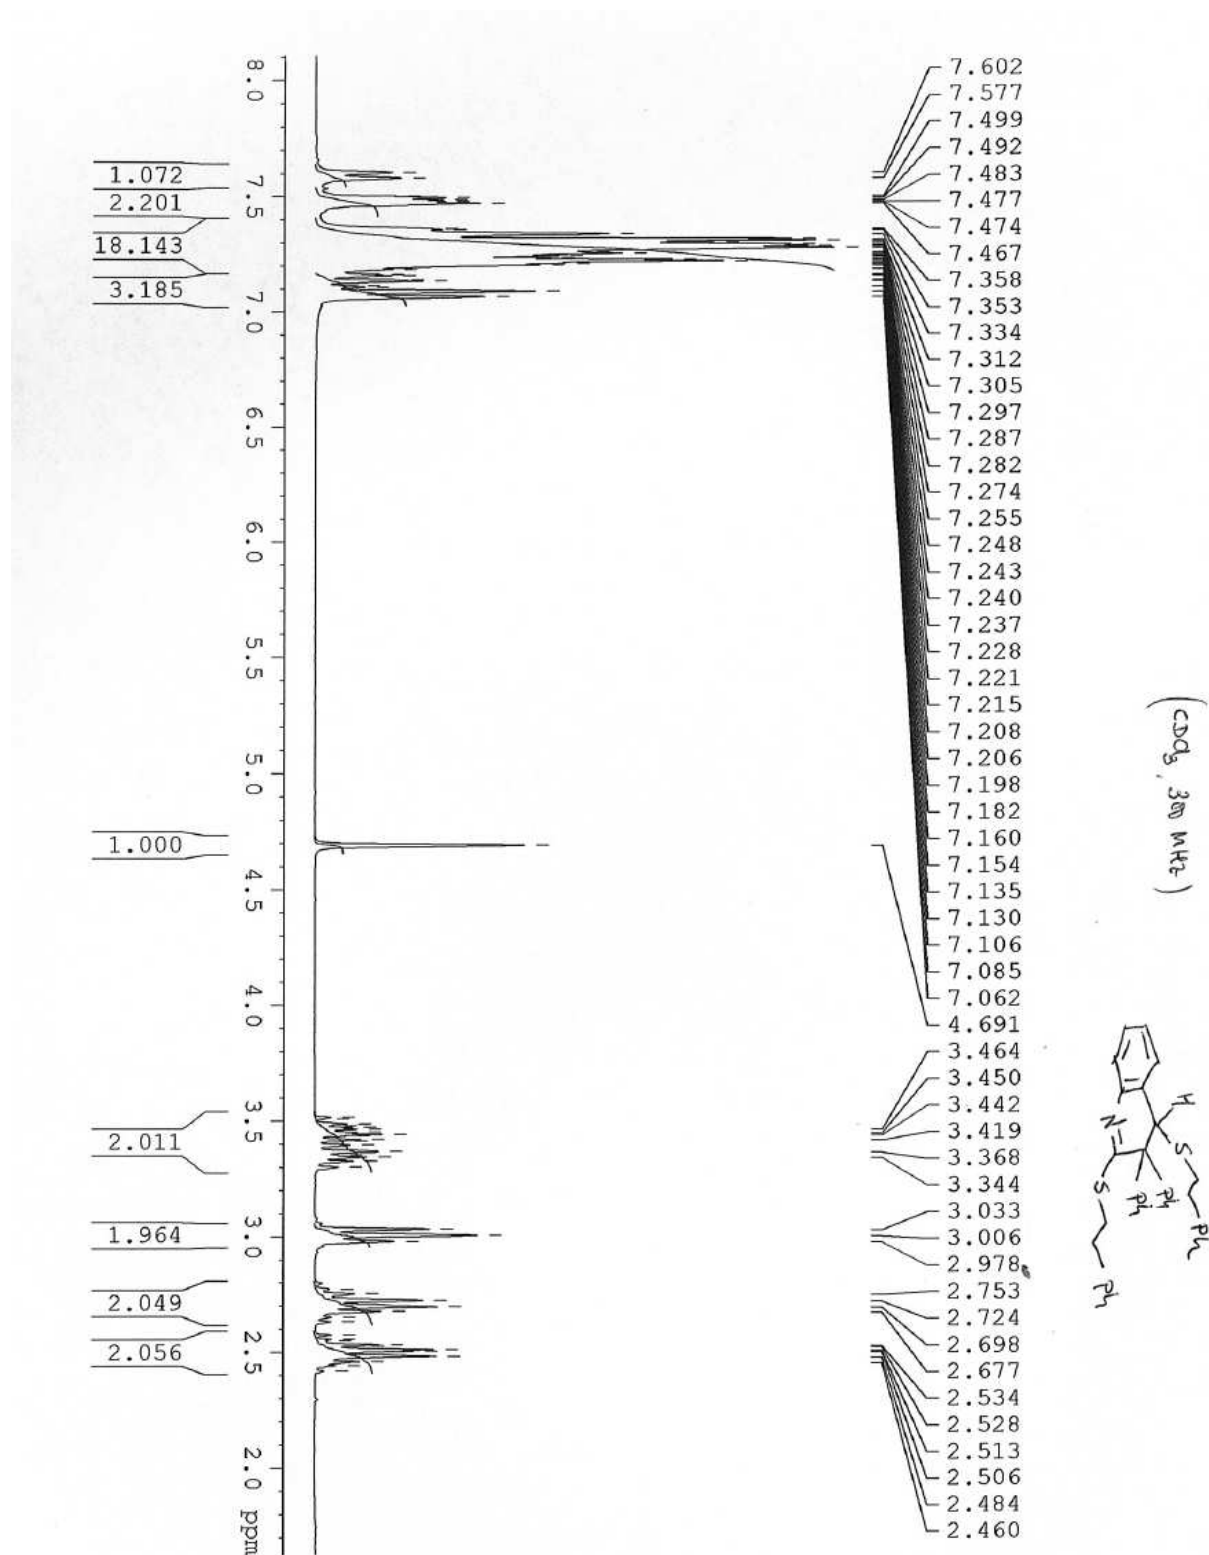



$^{13}\text{C}$  NMR of **20c**

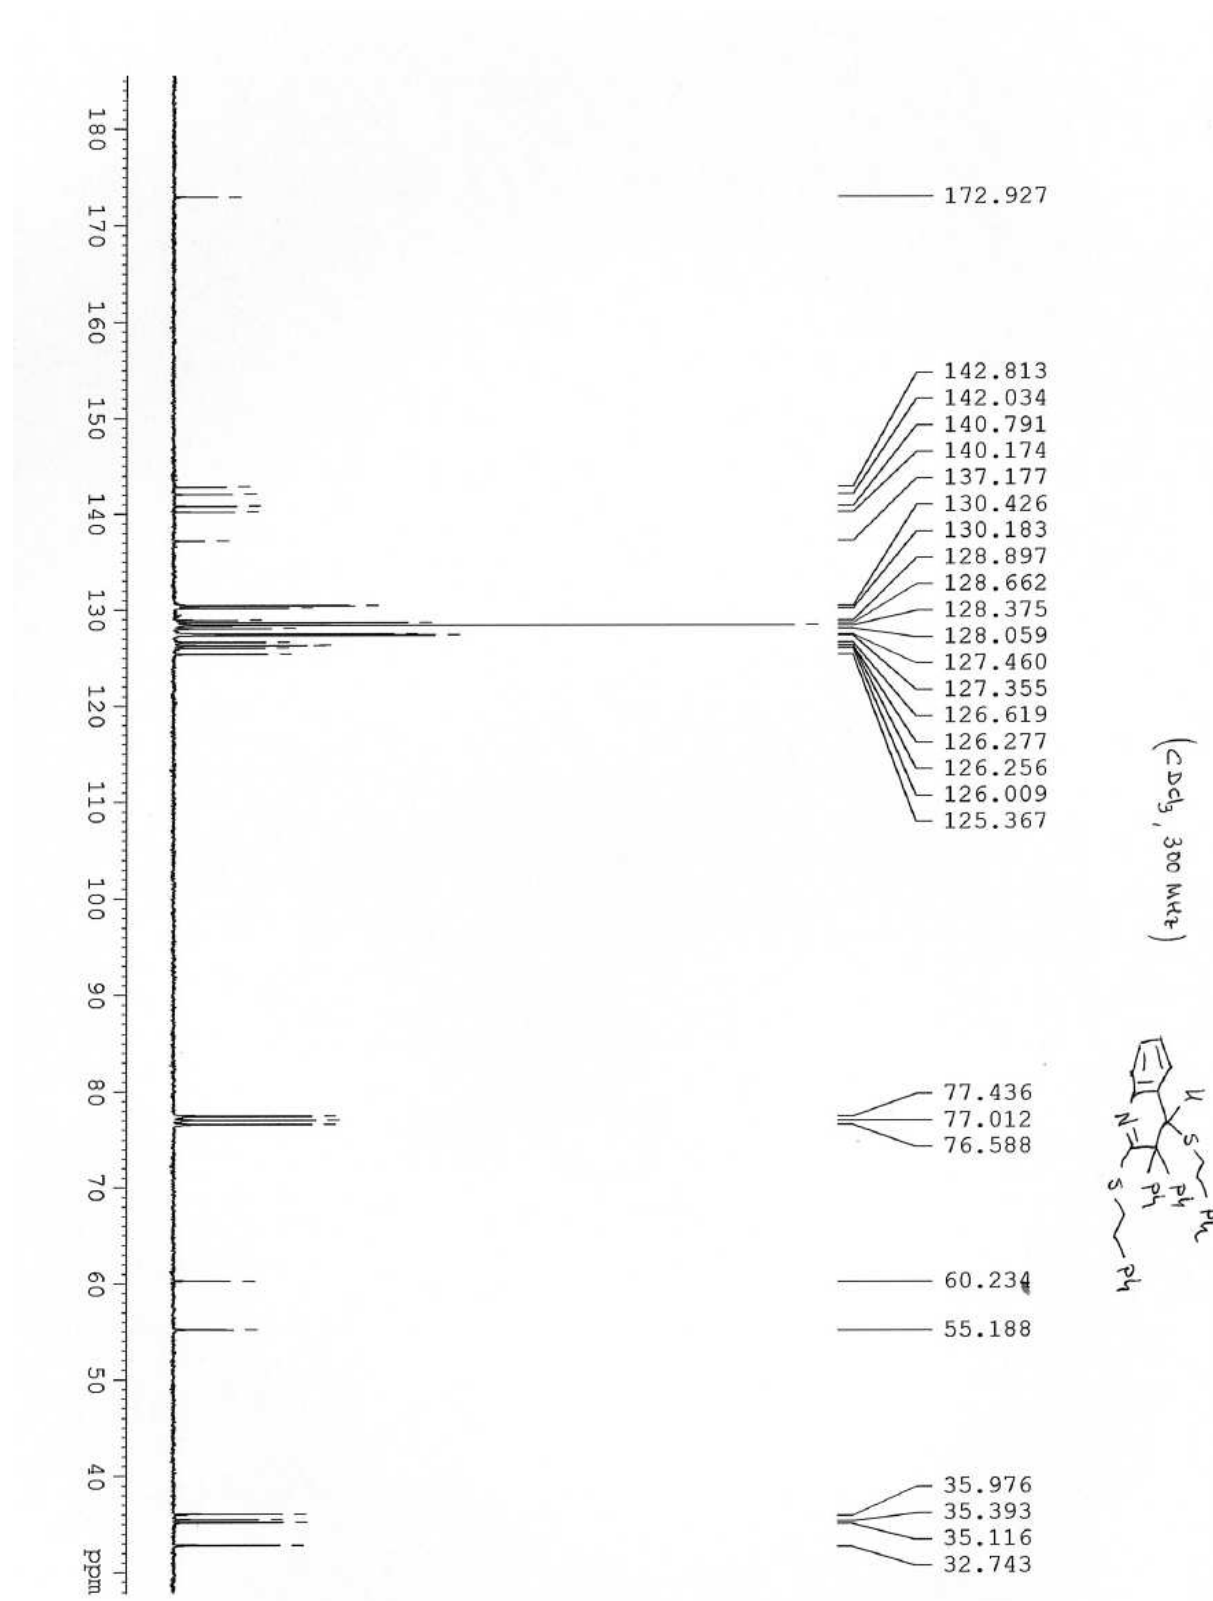

$^1\text{H}$  NMR of *cis*-20d (containing small amount of *trans*-20d)

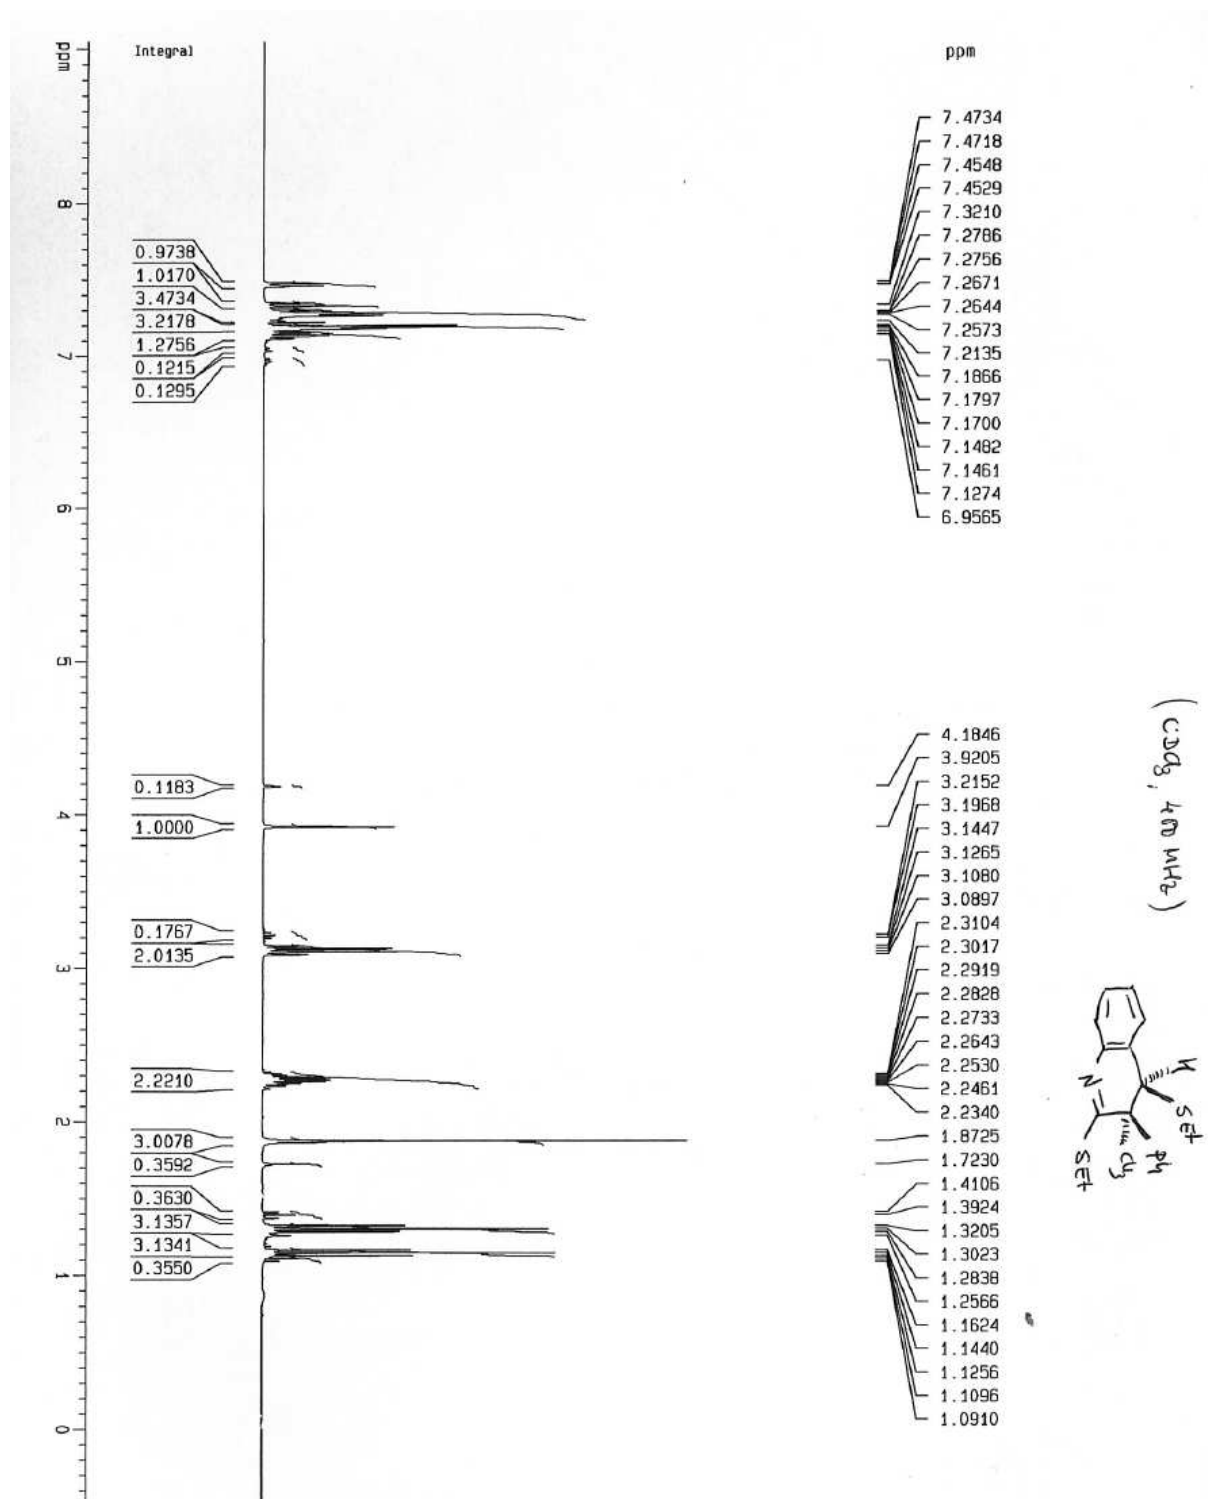

$^{13}\text{C}$  NMR of *cis*-20d (containing small amount of *trans*-20d)

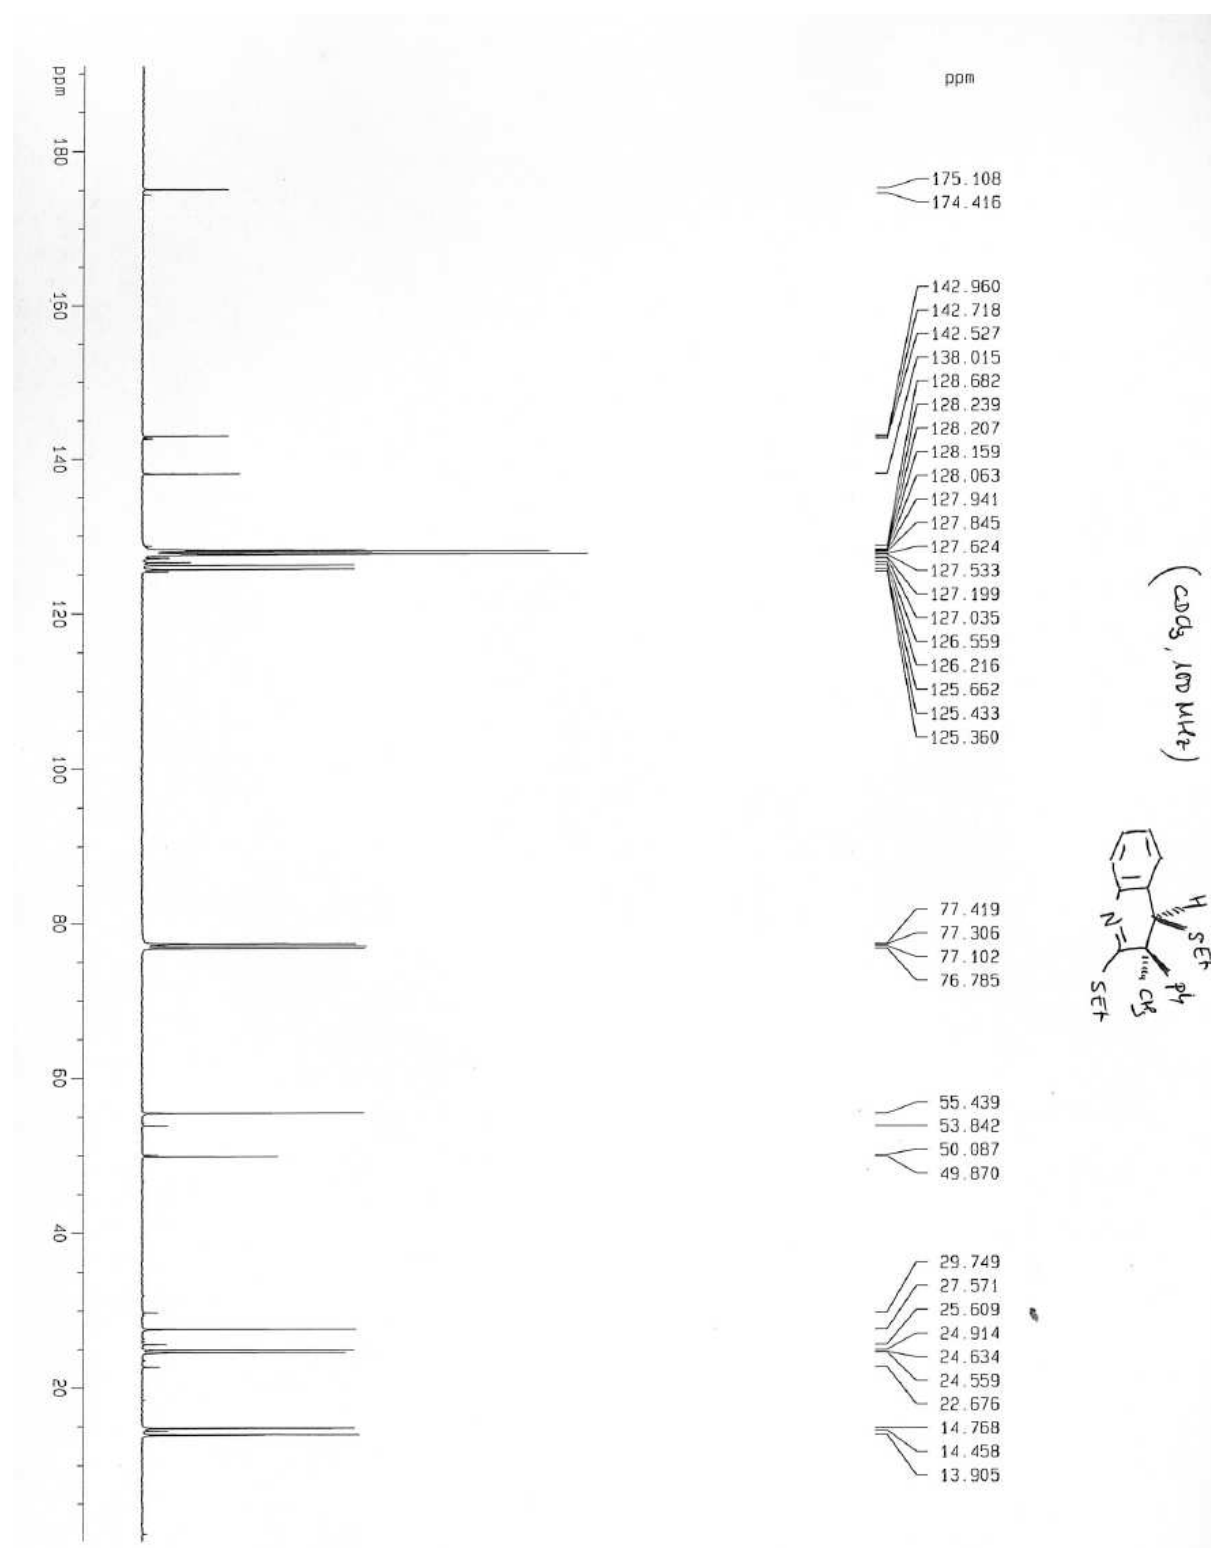

$^1\text{H}$  NMR of *cis*-20e

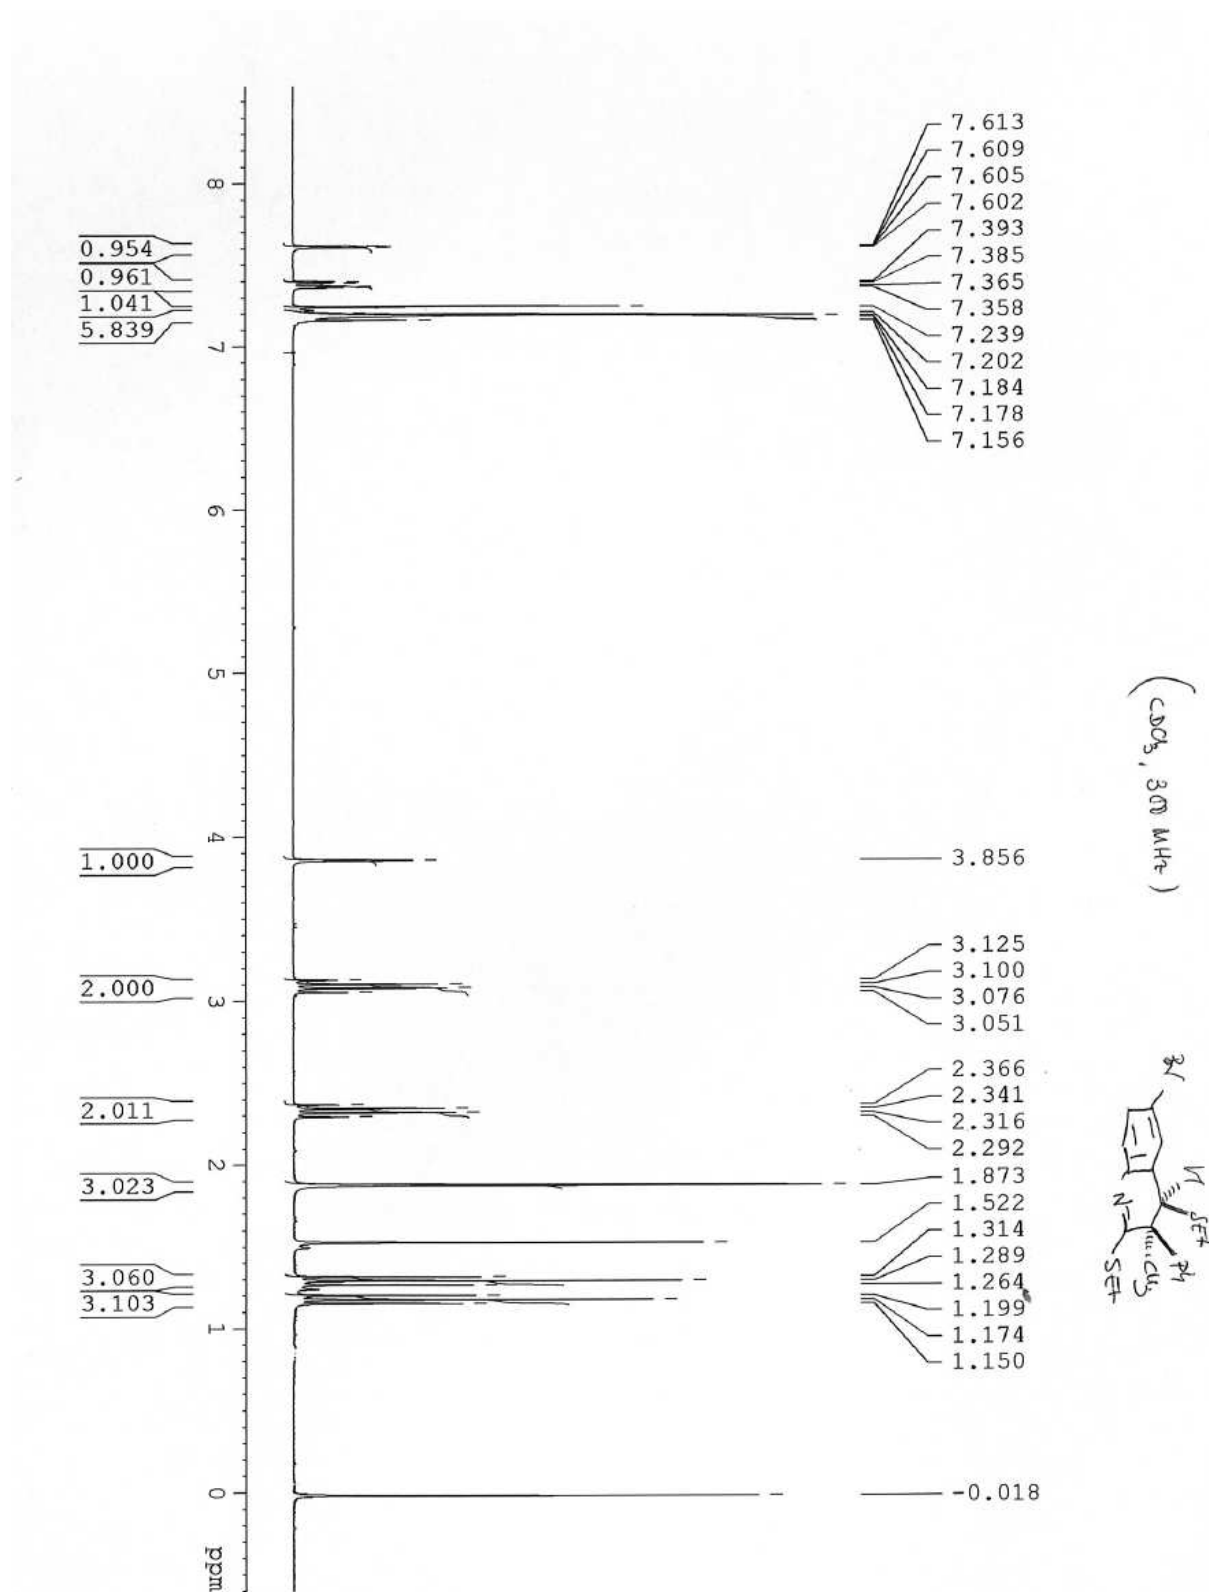

$^{13}\text{C}$  NMR of *cis*-20e

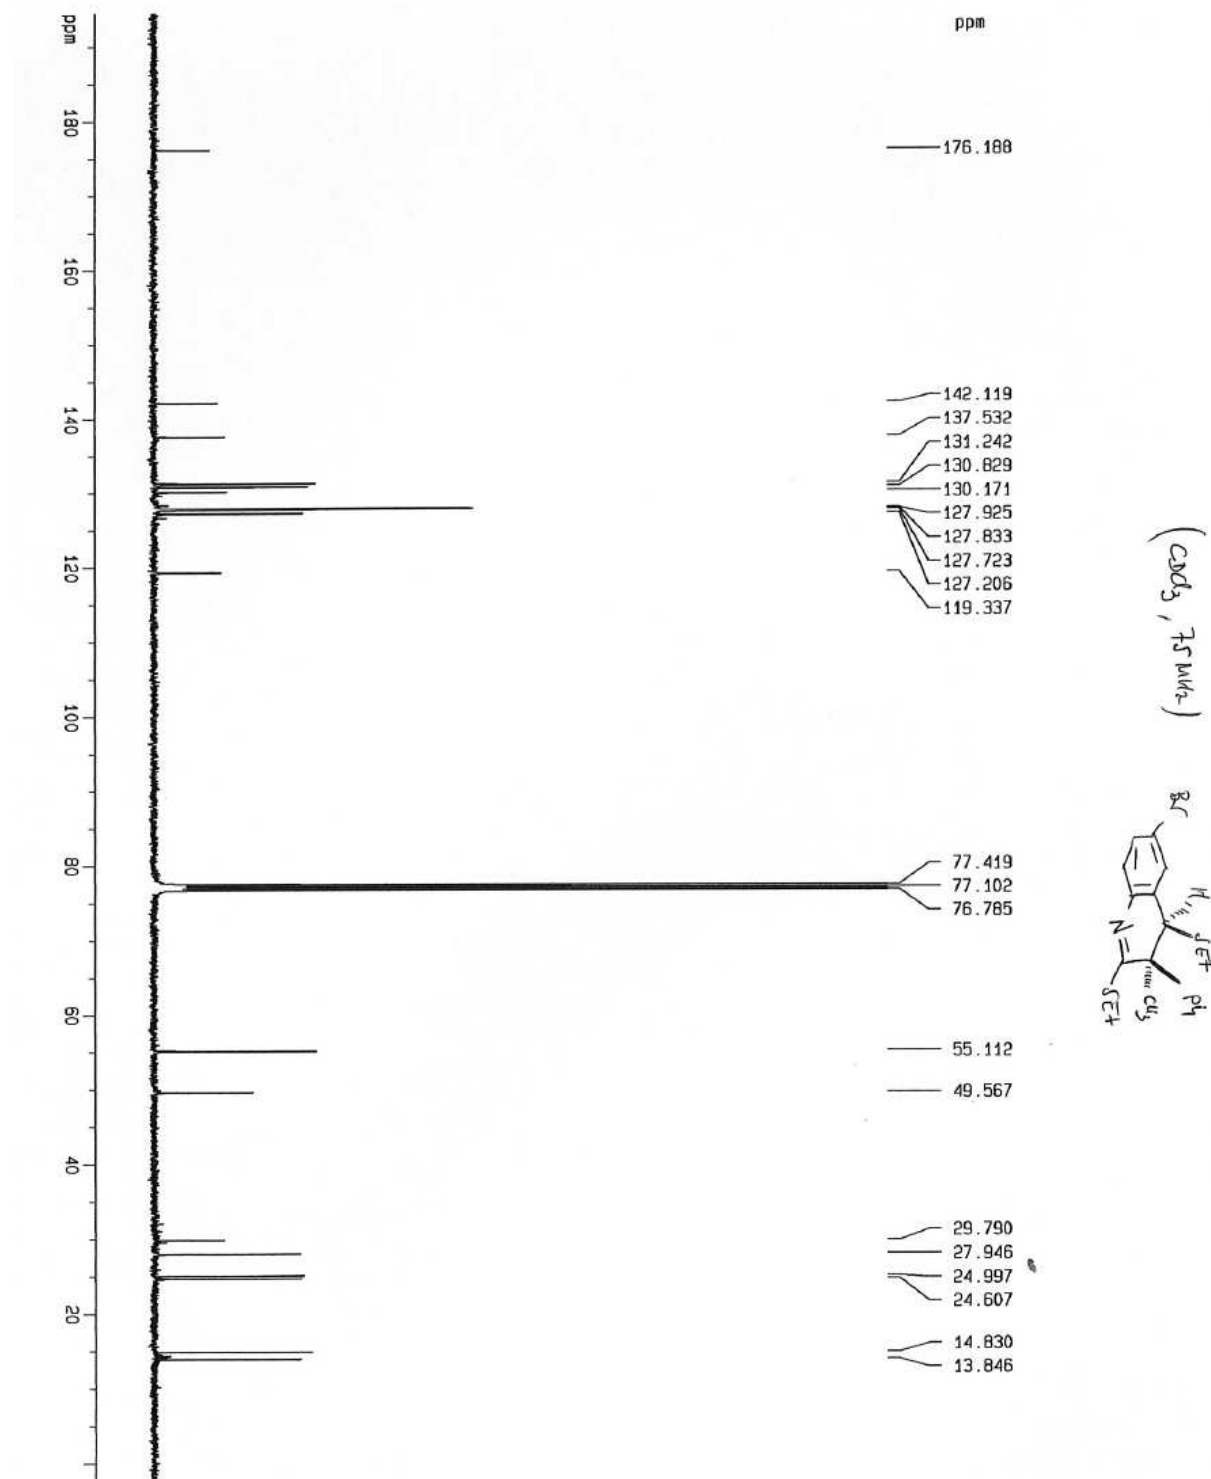

$^1\text{H}$  NMR of *cis*-20e + *trans*-20e

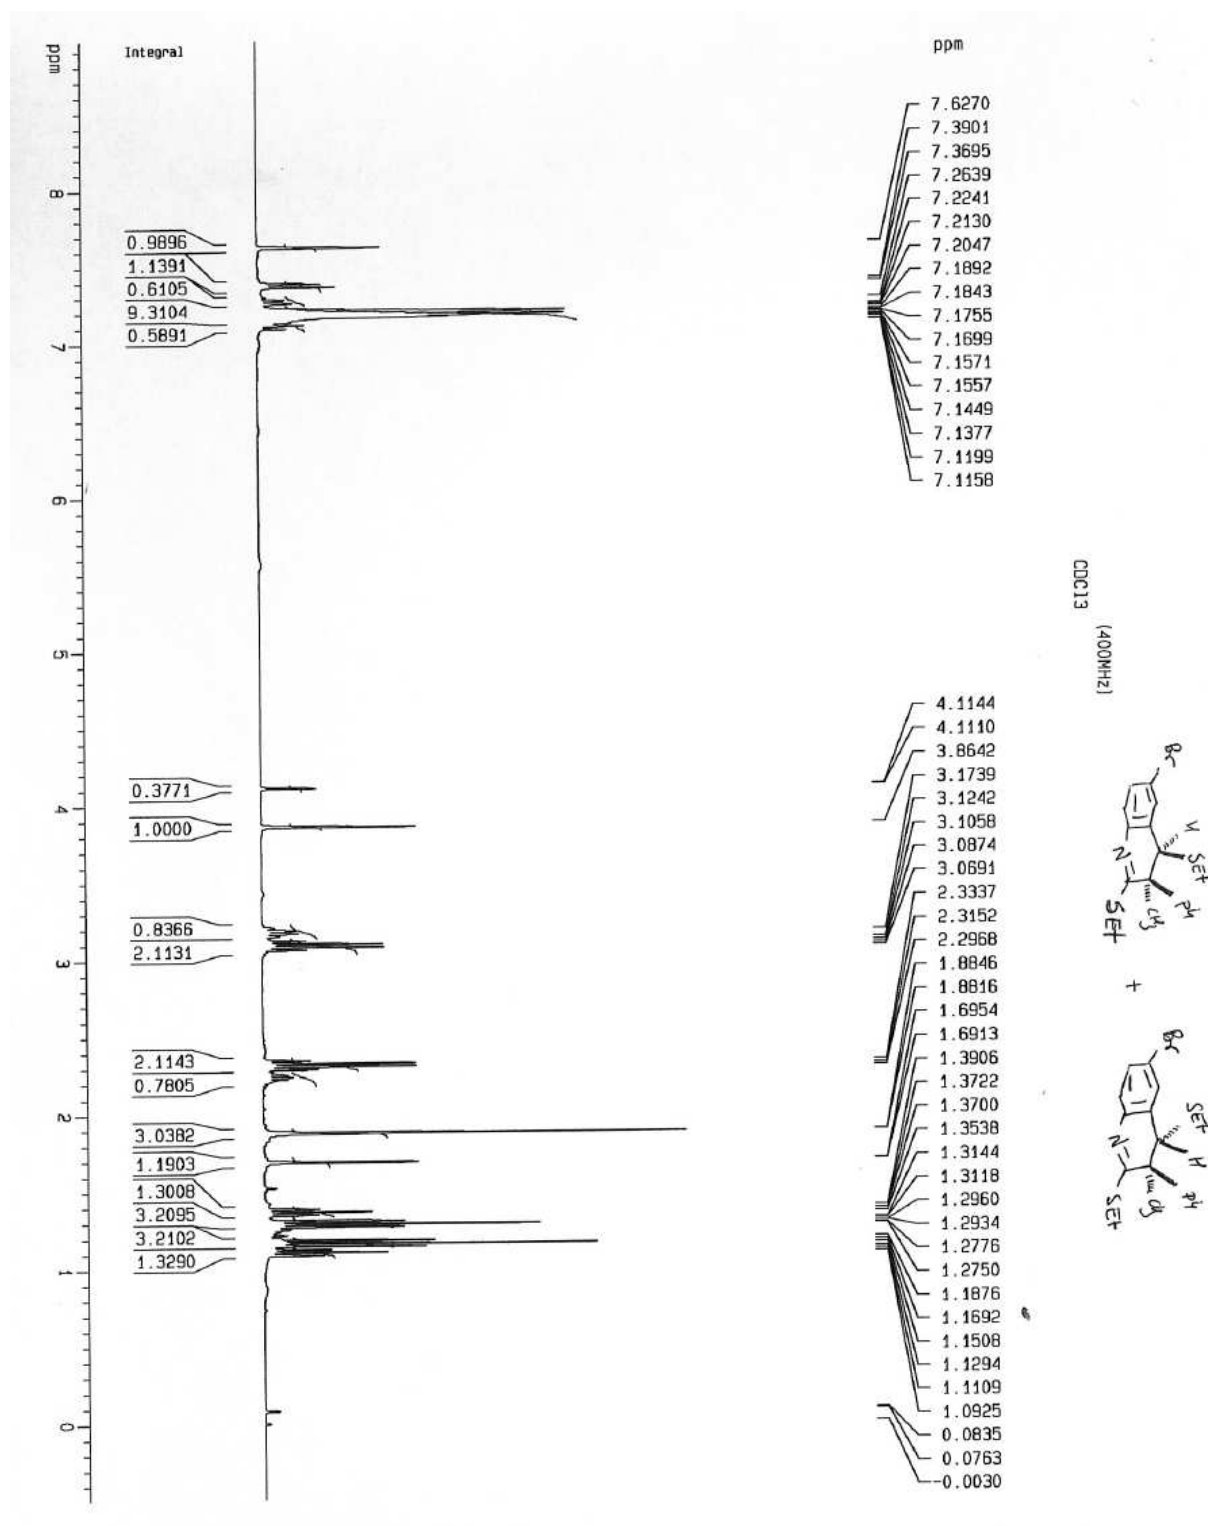

$^{13}\text{C}$  NMR of *cis*-20e + *trans*-20e

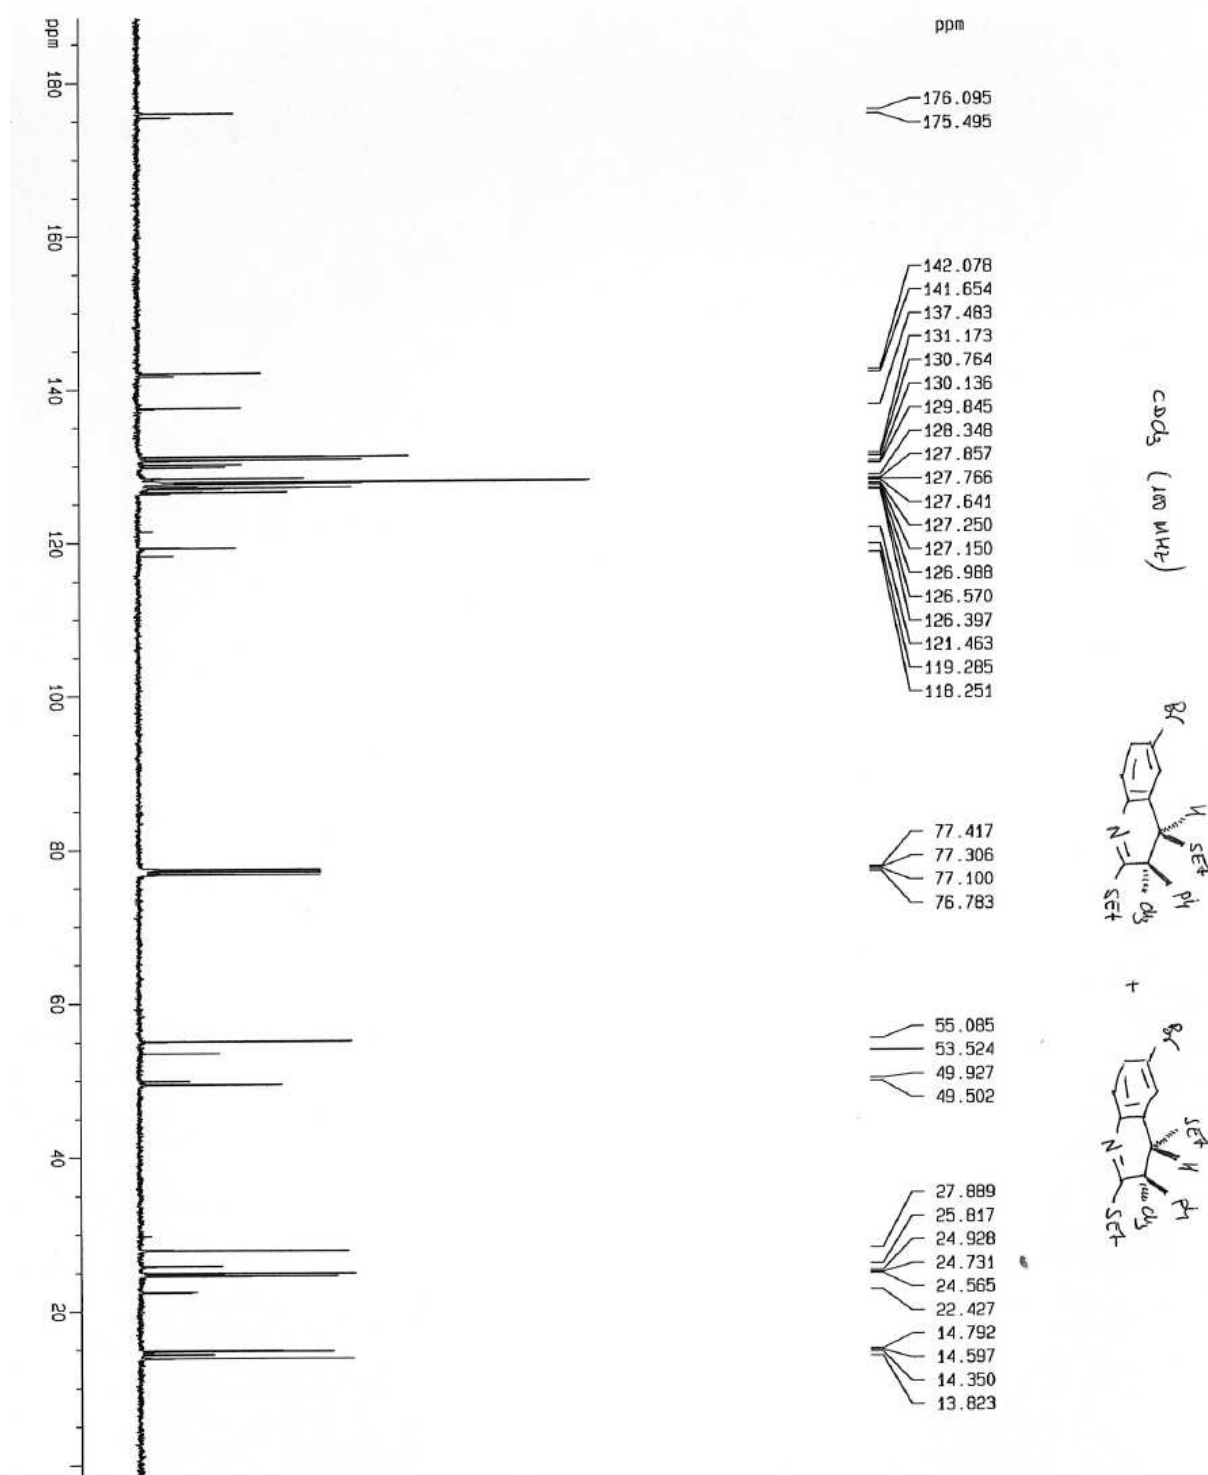

<sup>1</sup>H NMR of **21**

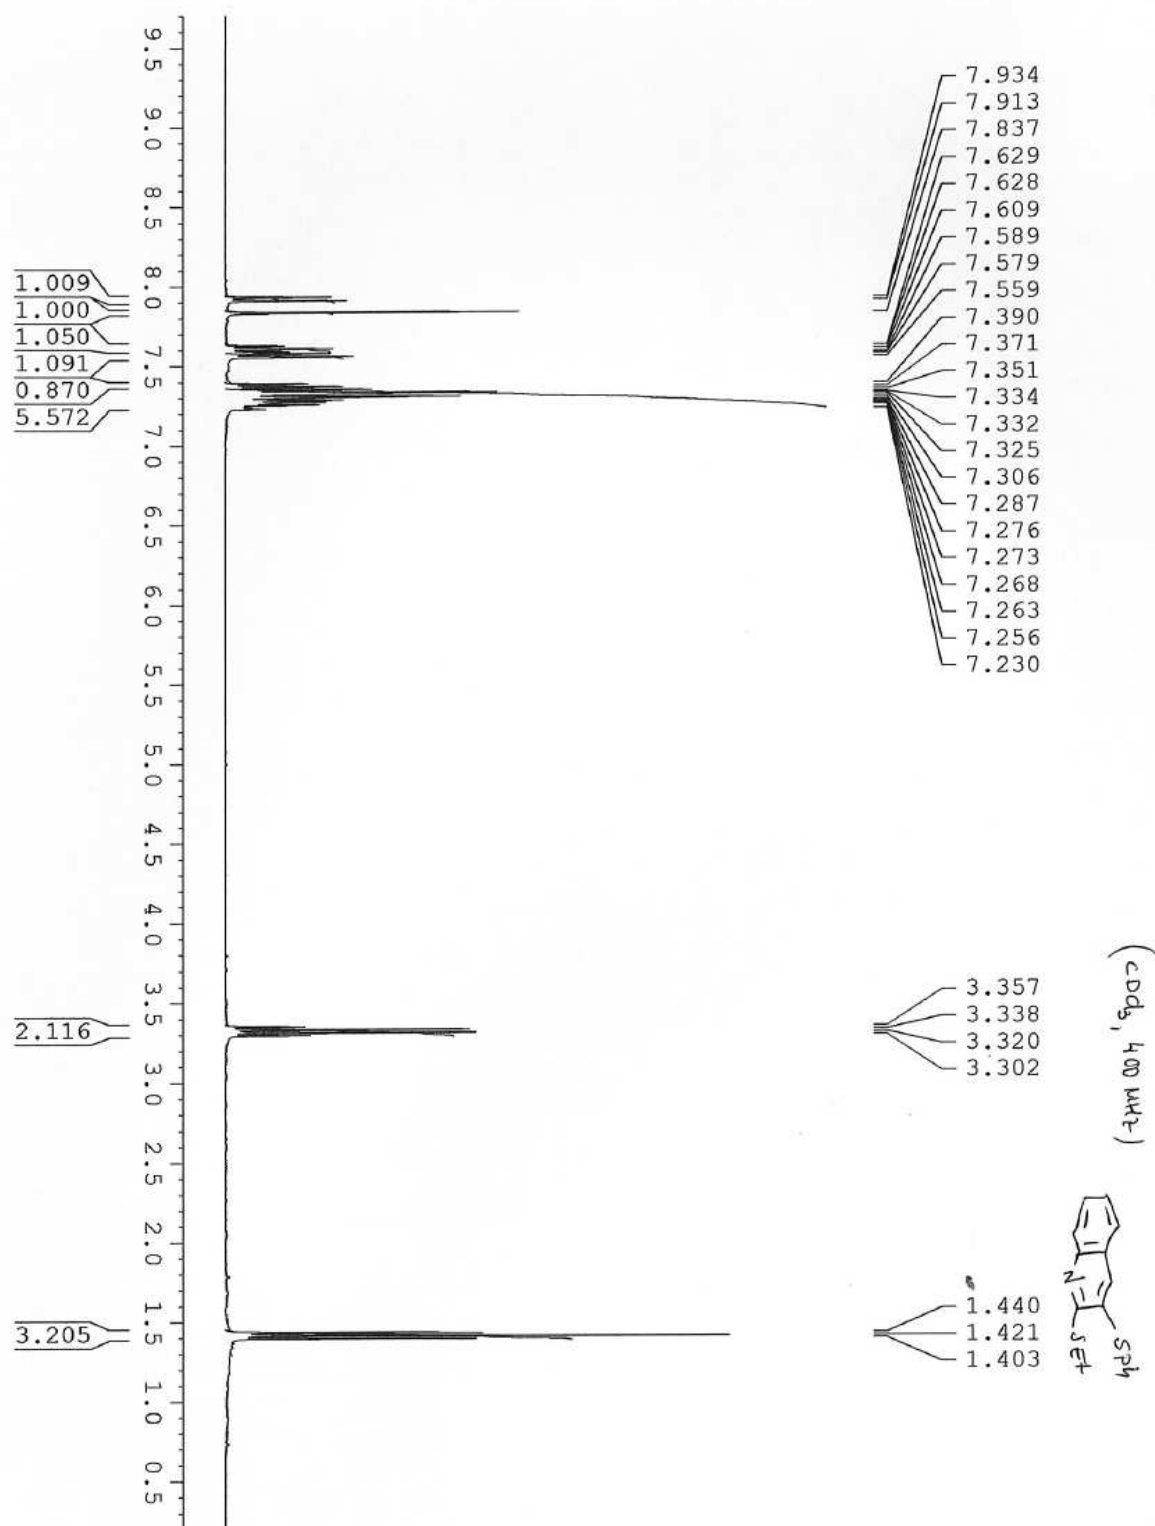



$^{13}\text{C}$  NMR of **21**

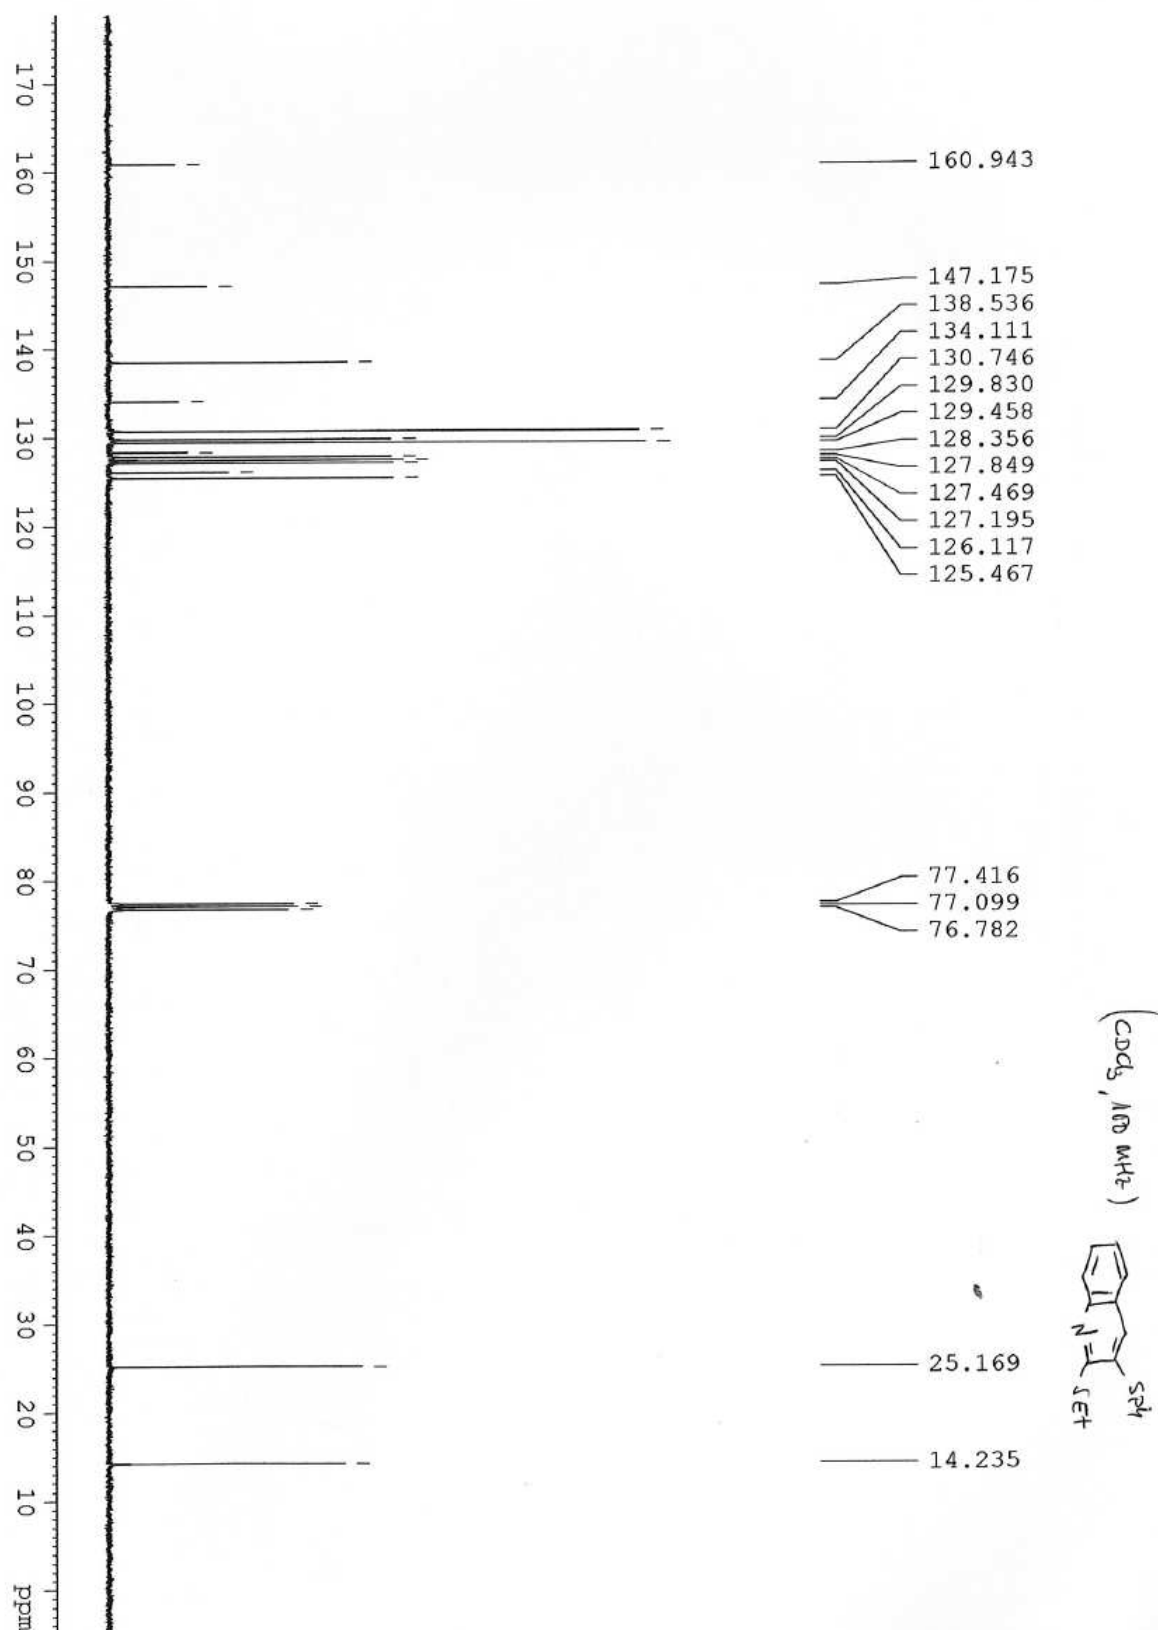

<sup>1</sup>H NMR of 26

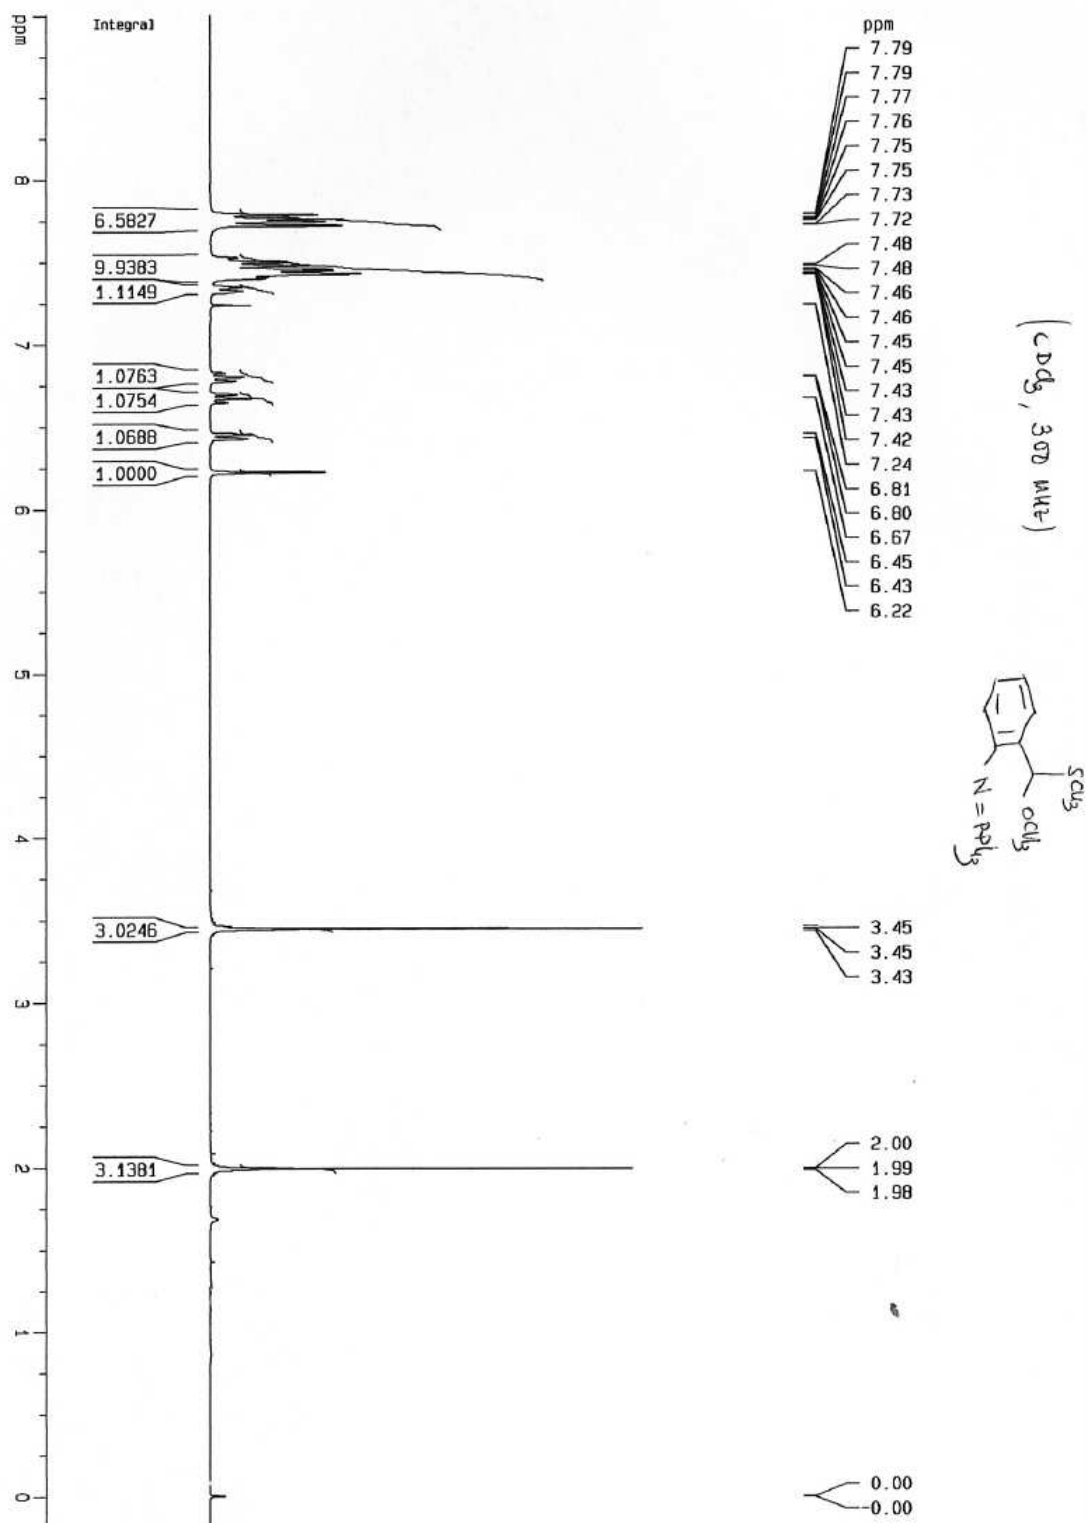

$^{13}\text{C}$  NMR of **26**

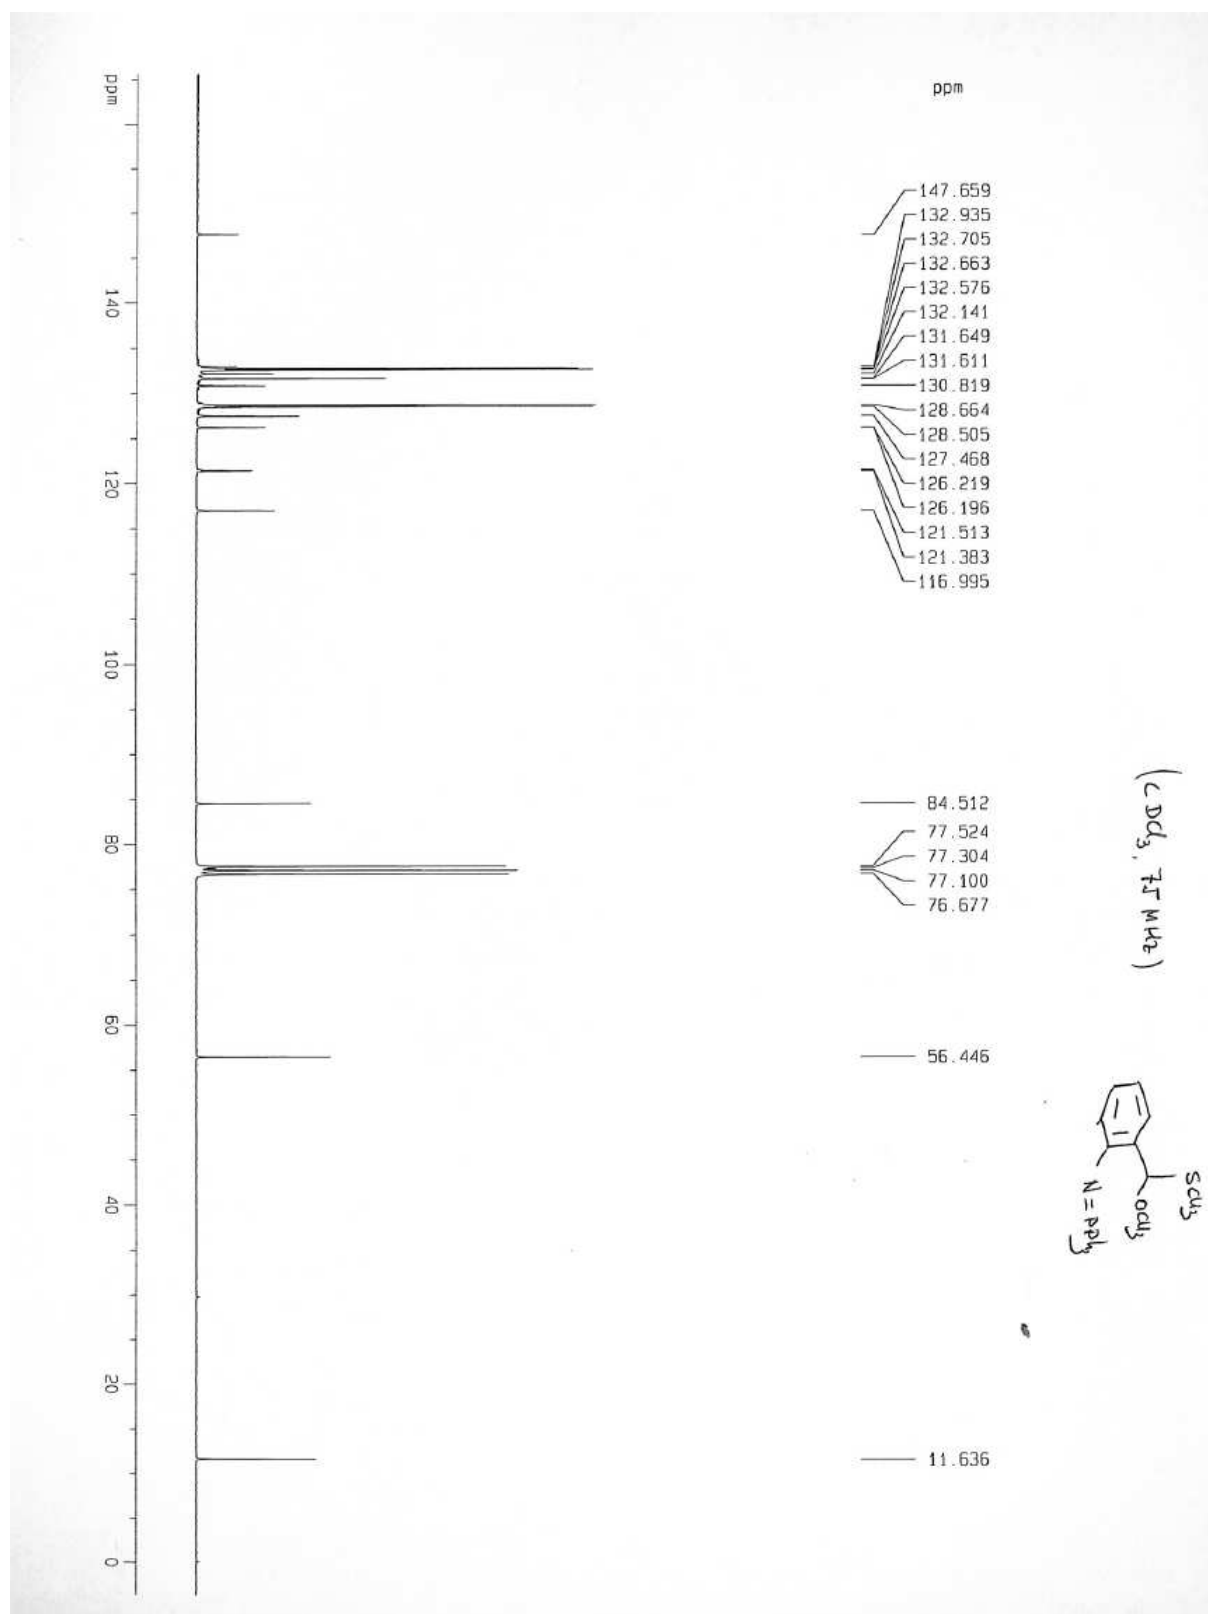

<sup>31</sup>P NMR of **26**

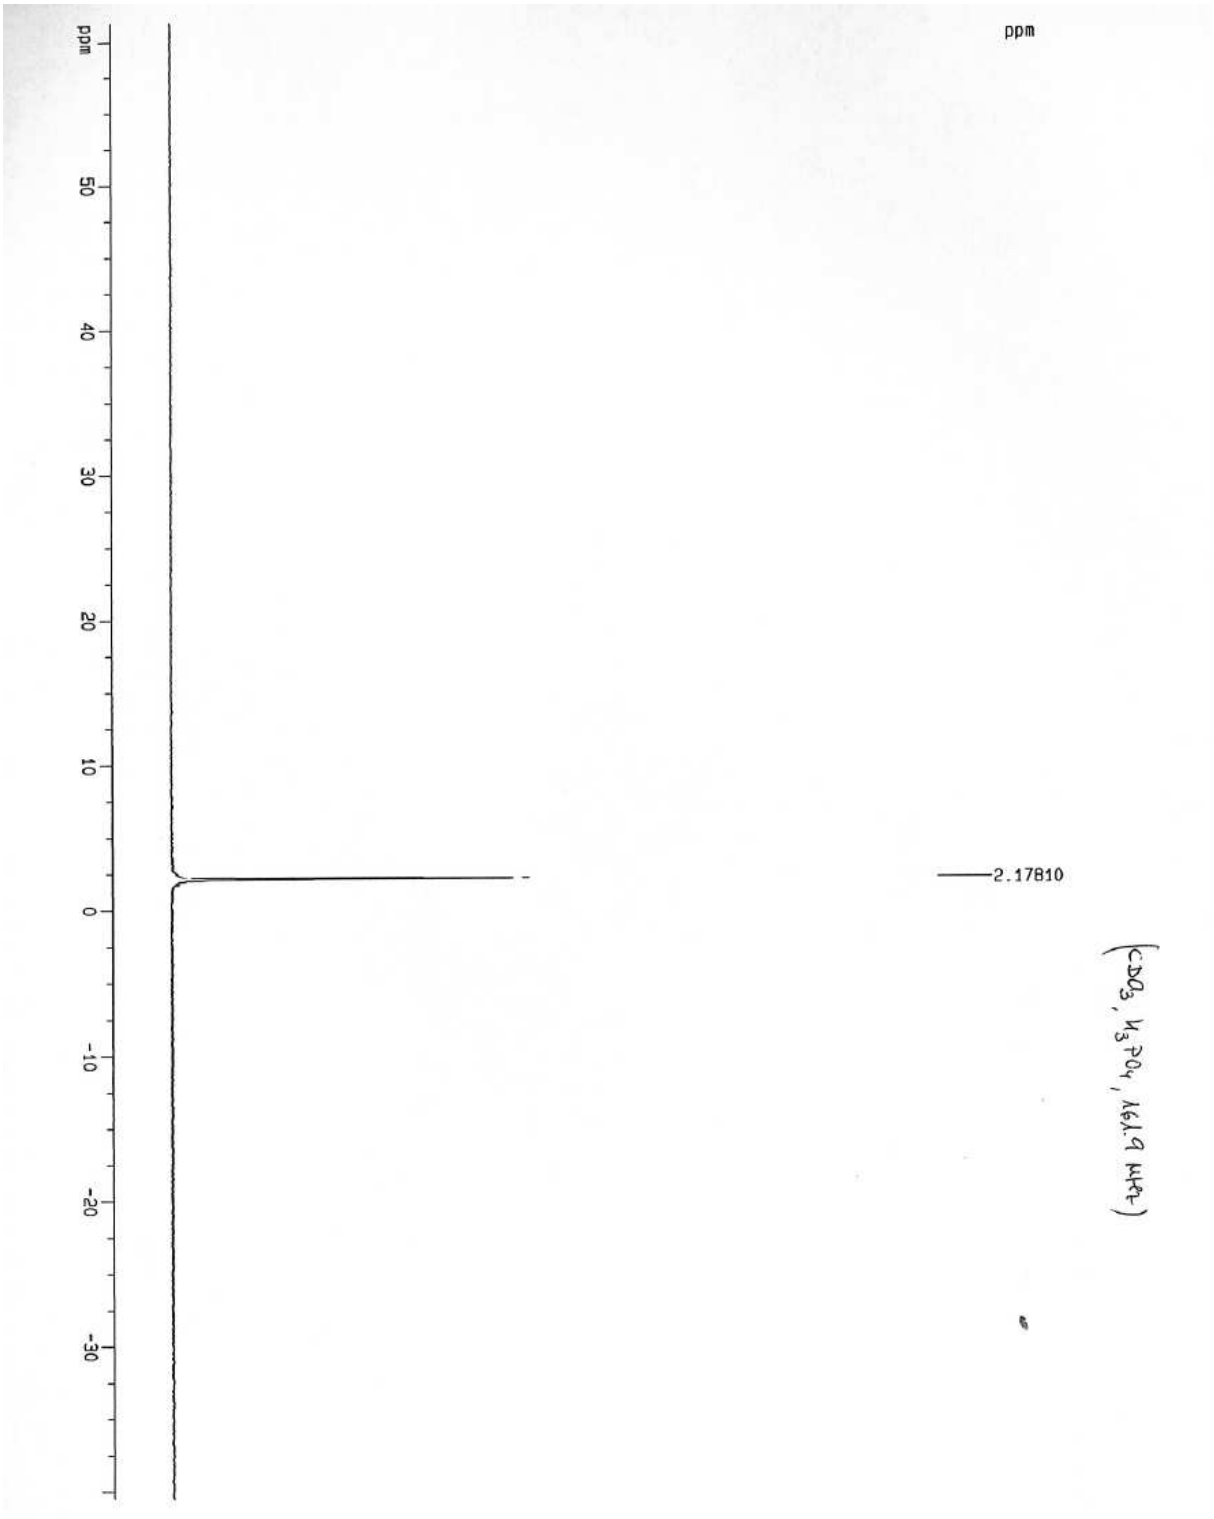

<sup>1</sup>H NMR of **28a**

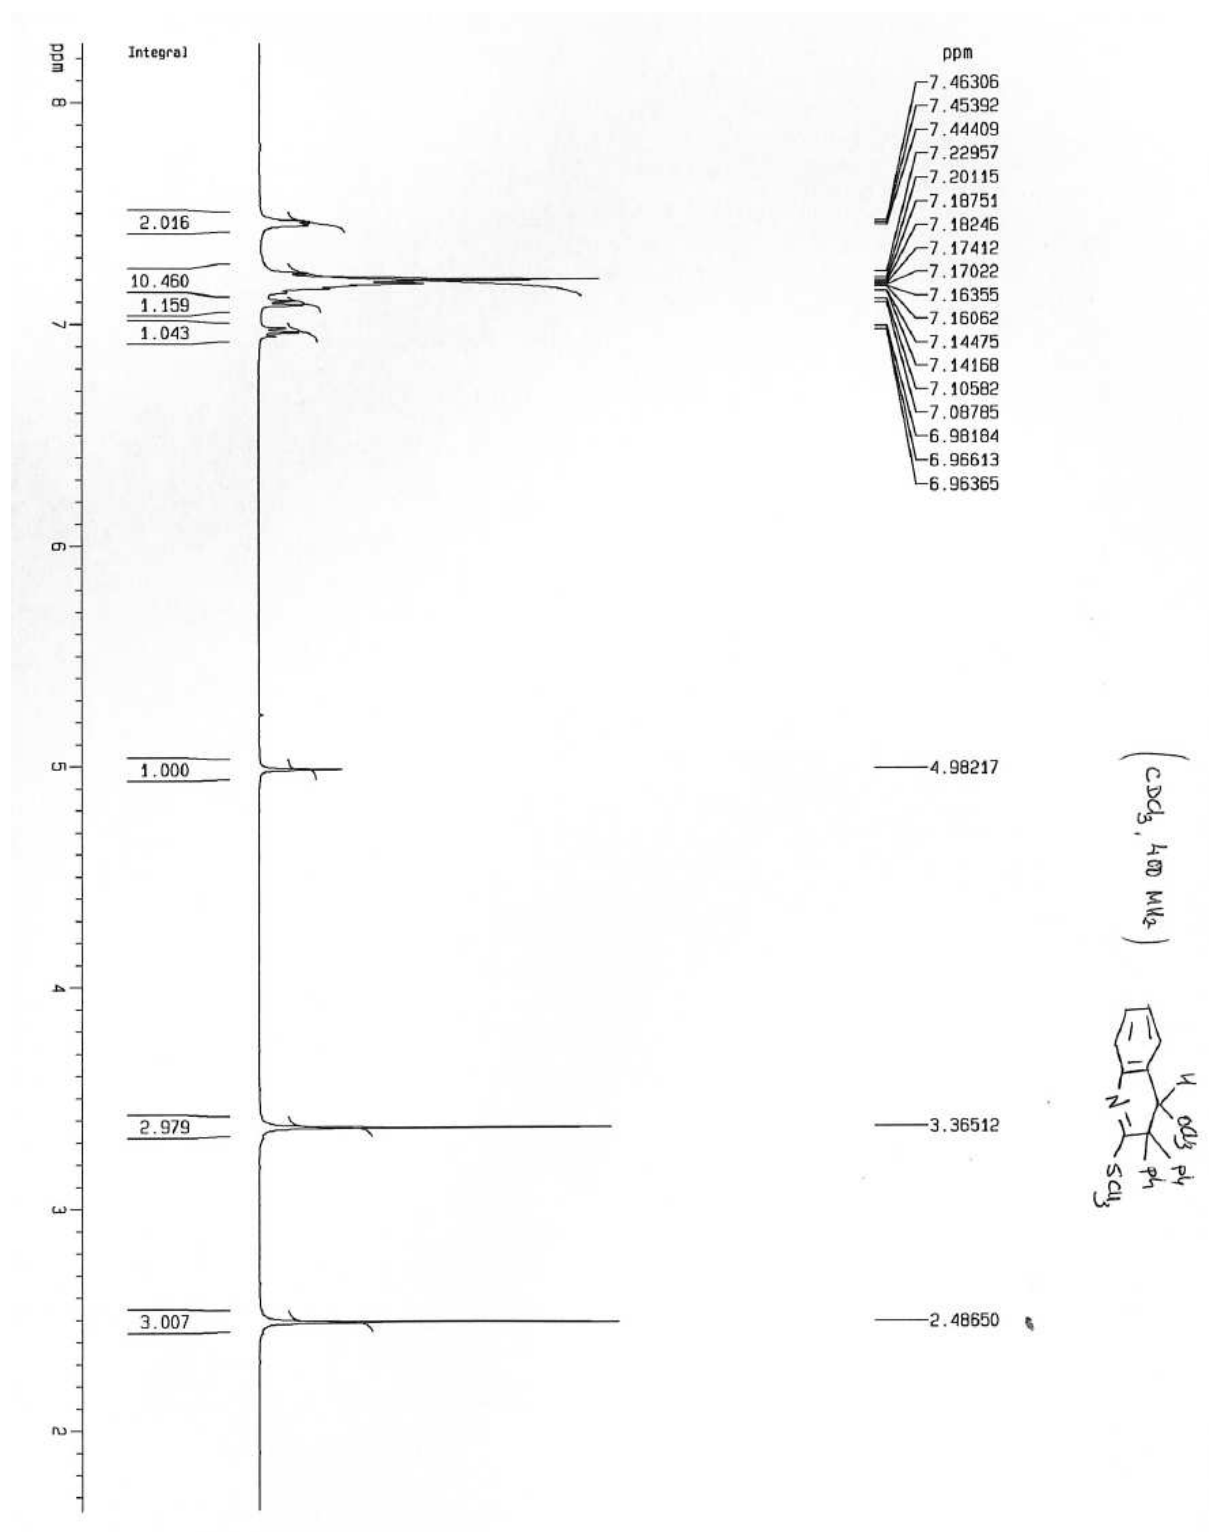

$^{13}\text{C}$  NMR of **28a**

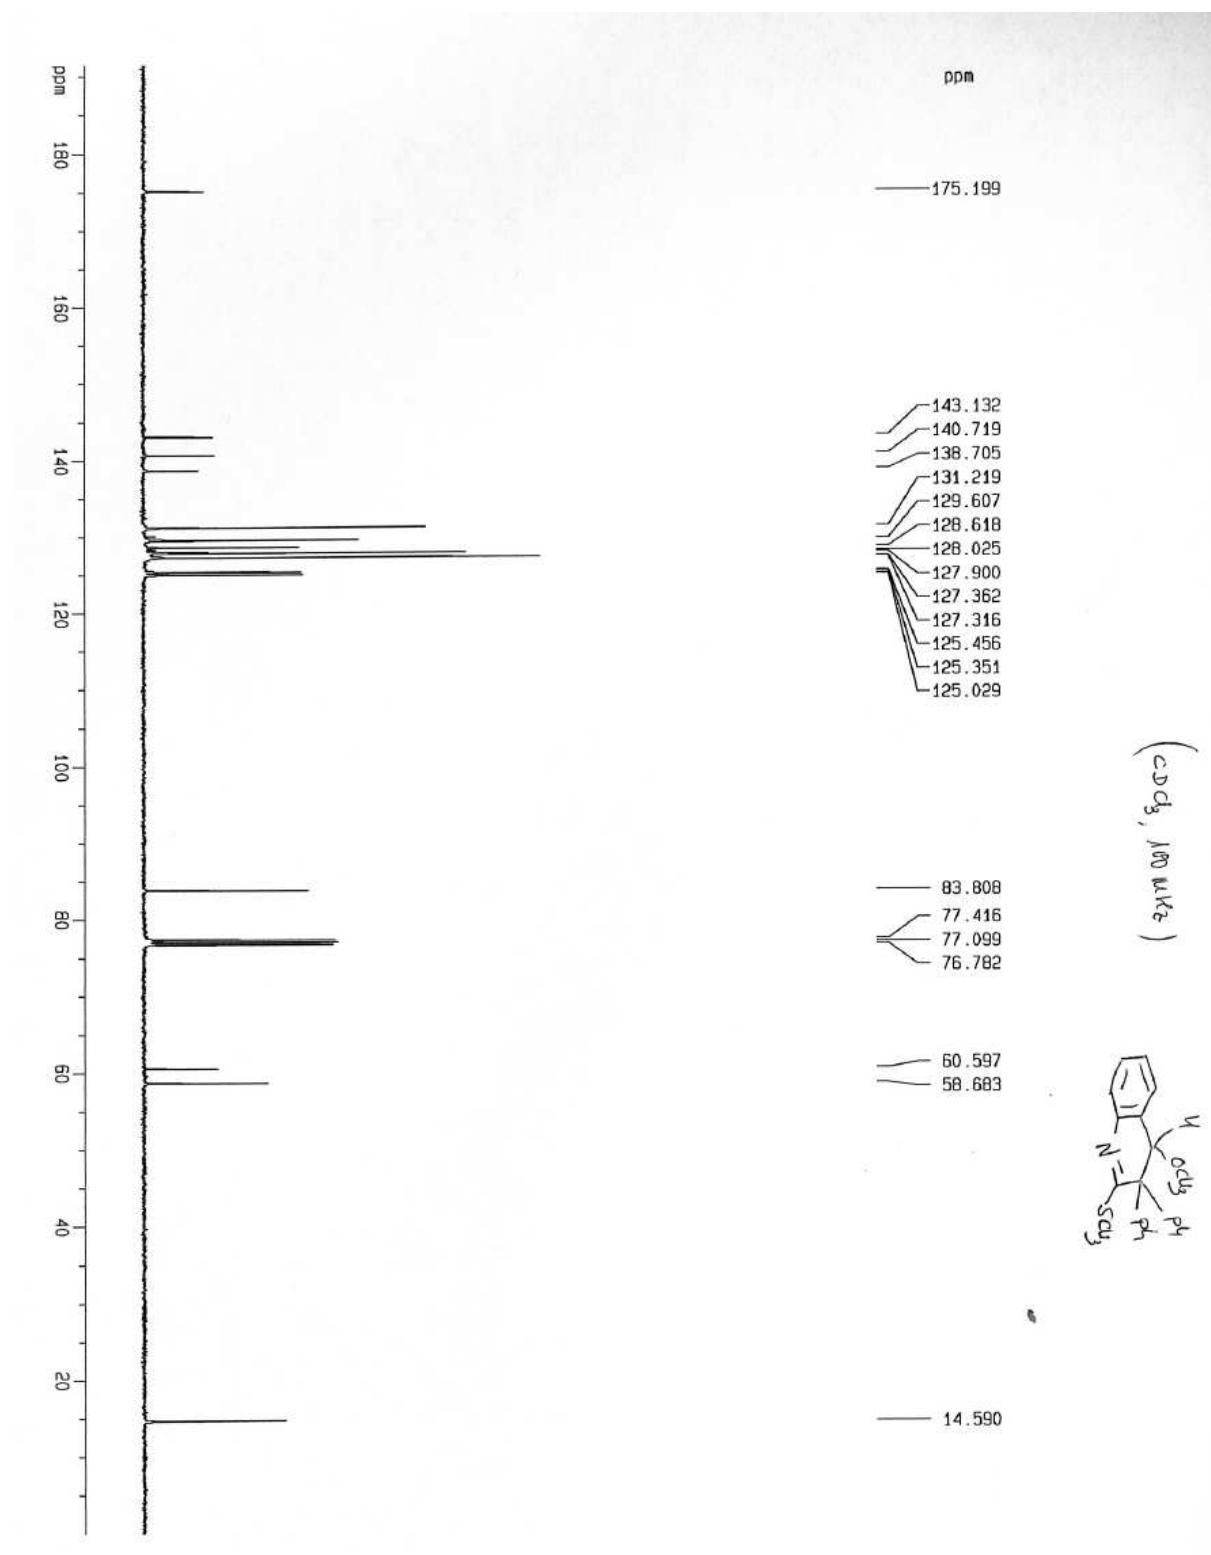

<sup>1</sup>H NMR of diastereoisomer 1 of 28b

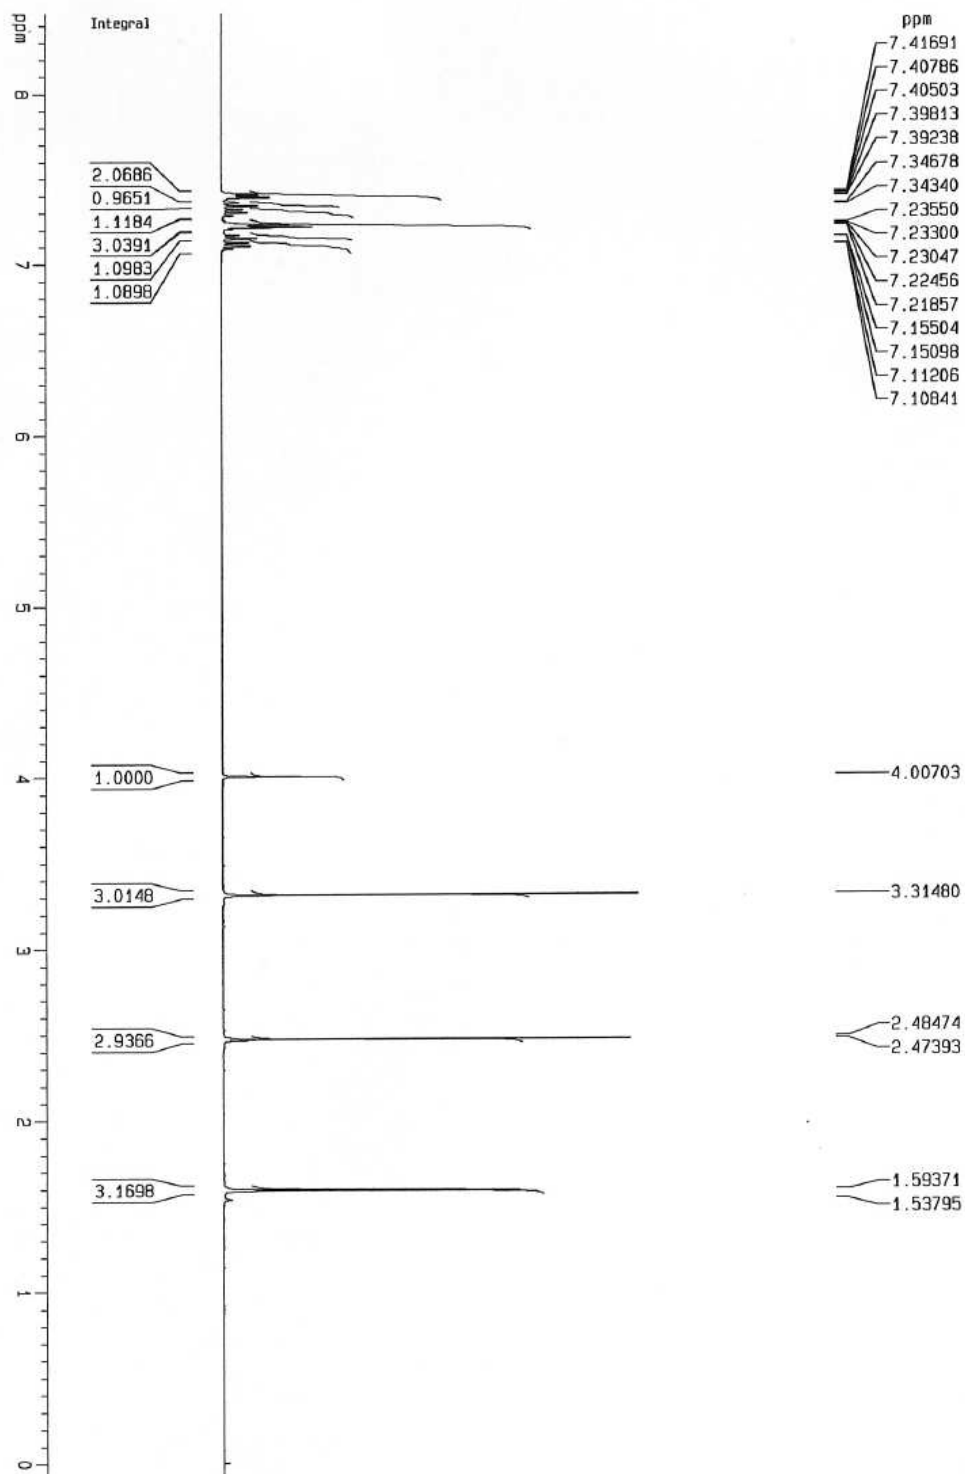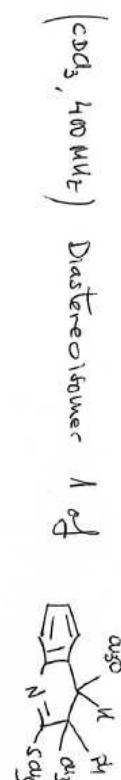

$^{13}\text{C}$  NMR of **diastereoisomer 1 of 28b**

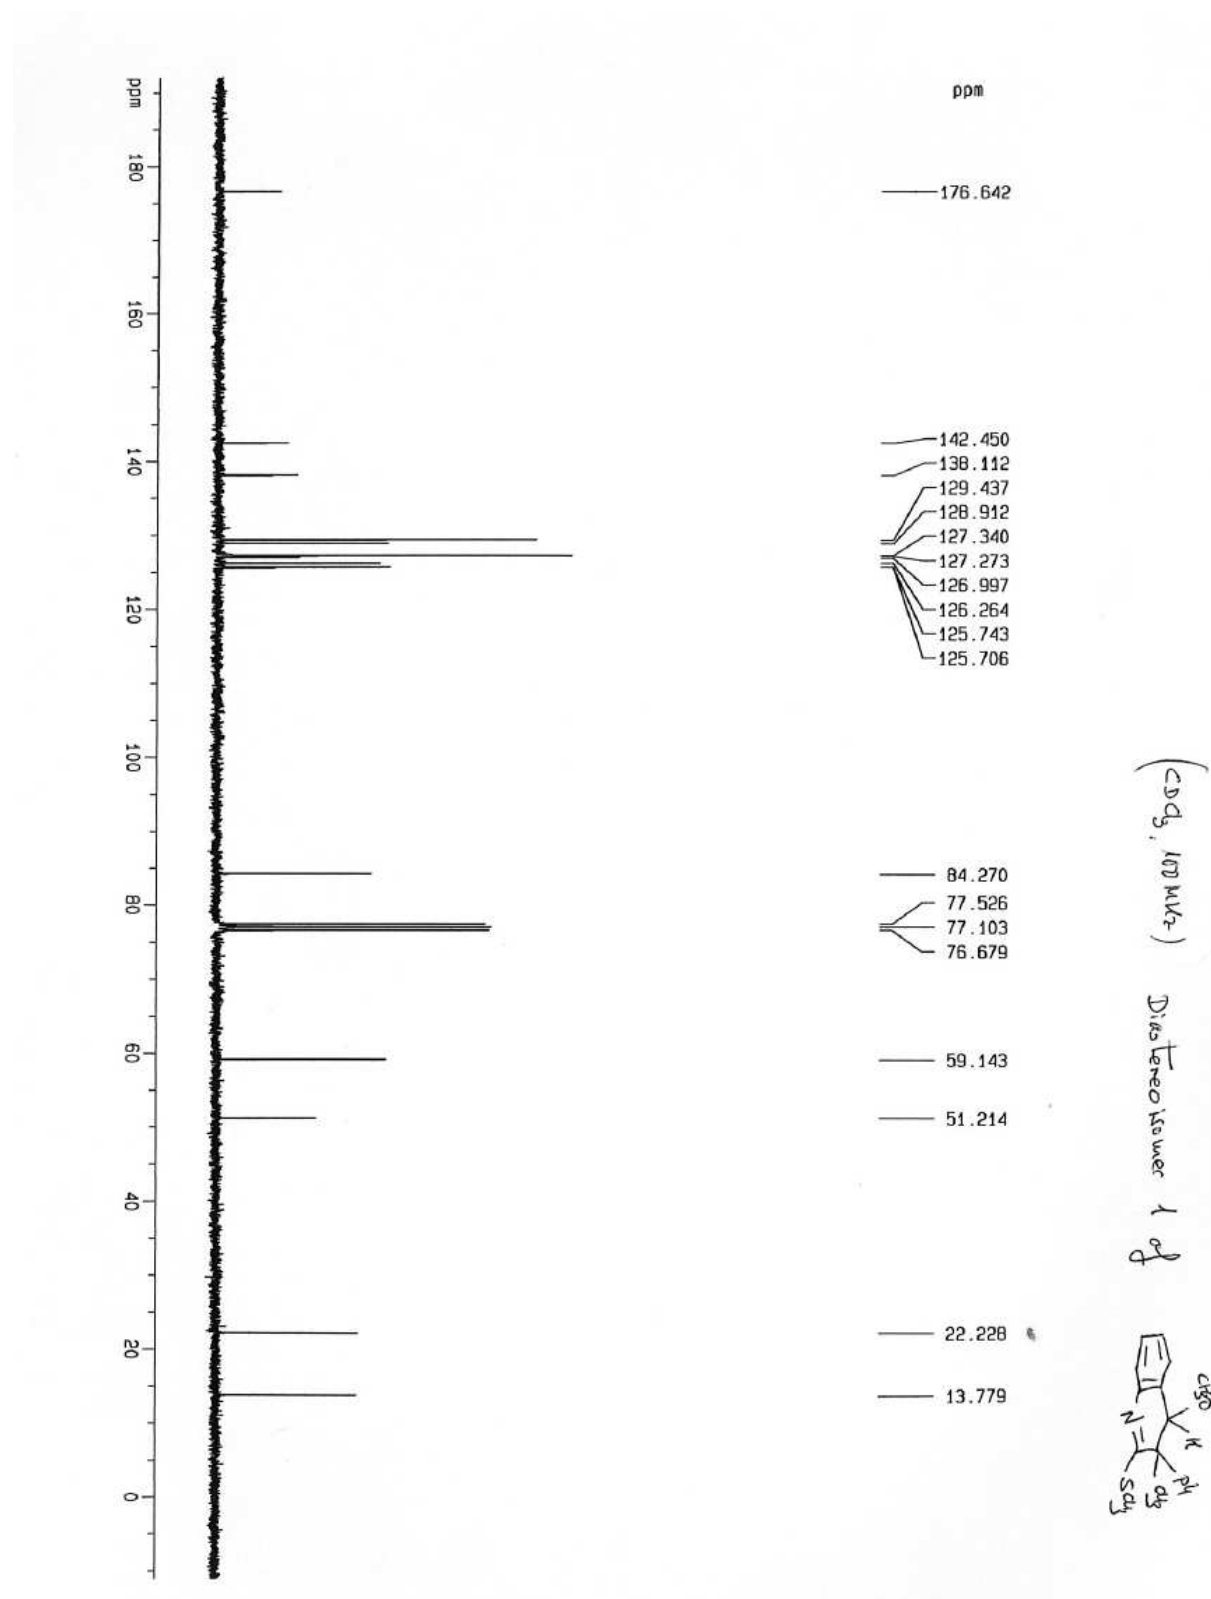



$^1\text{H}$  NMR of **diastereoisomer 2 of 28b** (containing small amount of **diastereoisomer 1 of 28b**)

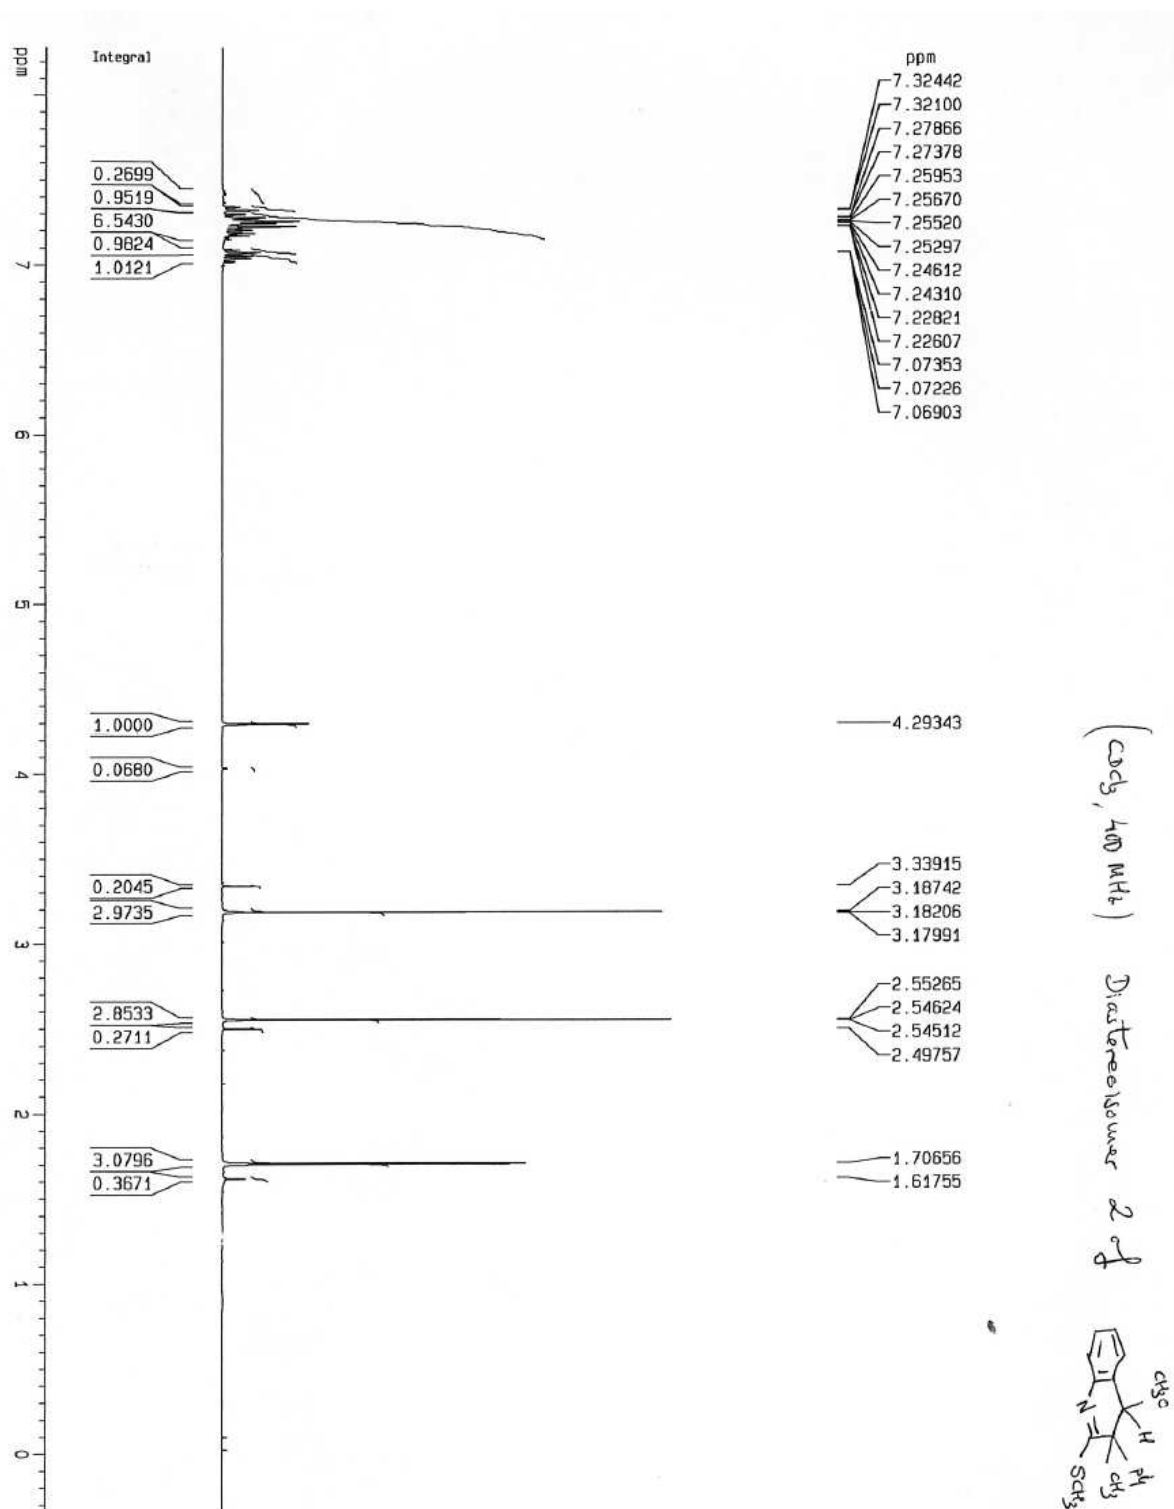

$^{13}\text{C}$  NMR of **diastereoisomer 2 of 28b** (containing small amount of **diastereoisomer 1 of 28b**)

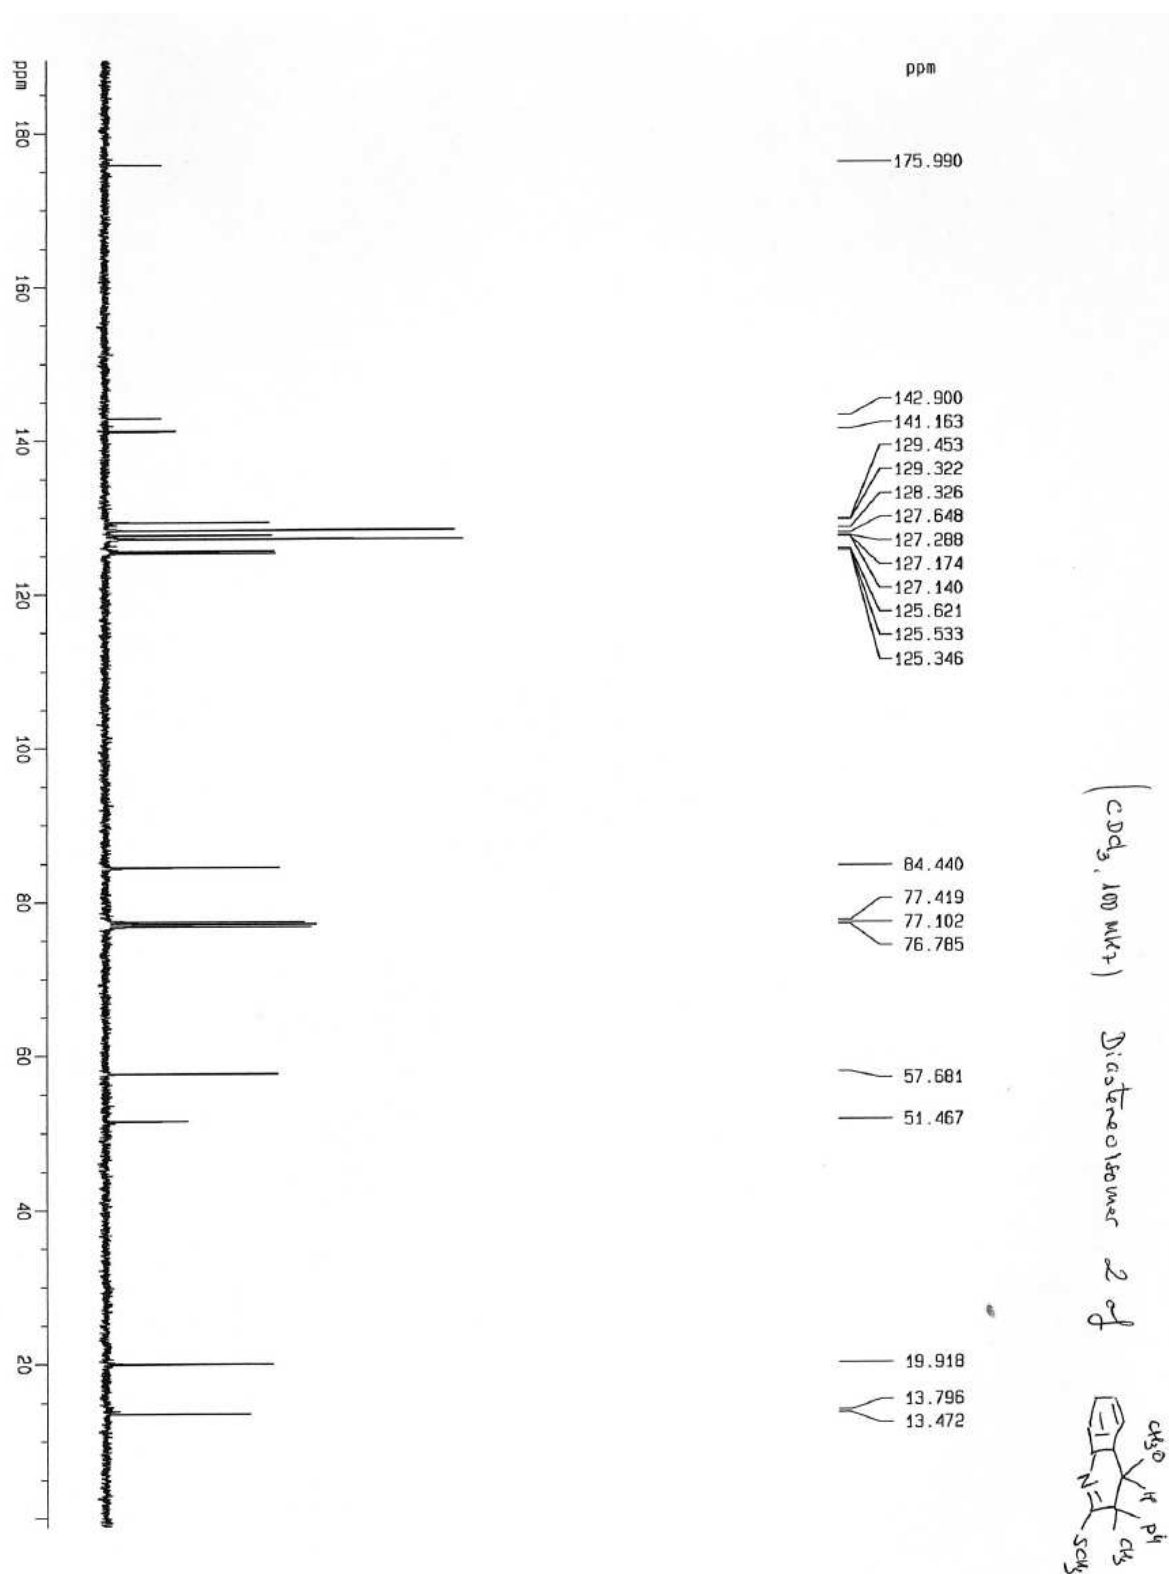

<sup>1</sup>H NMR 31a

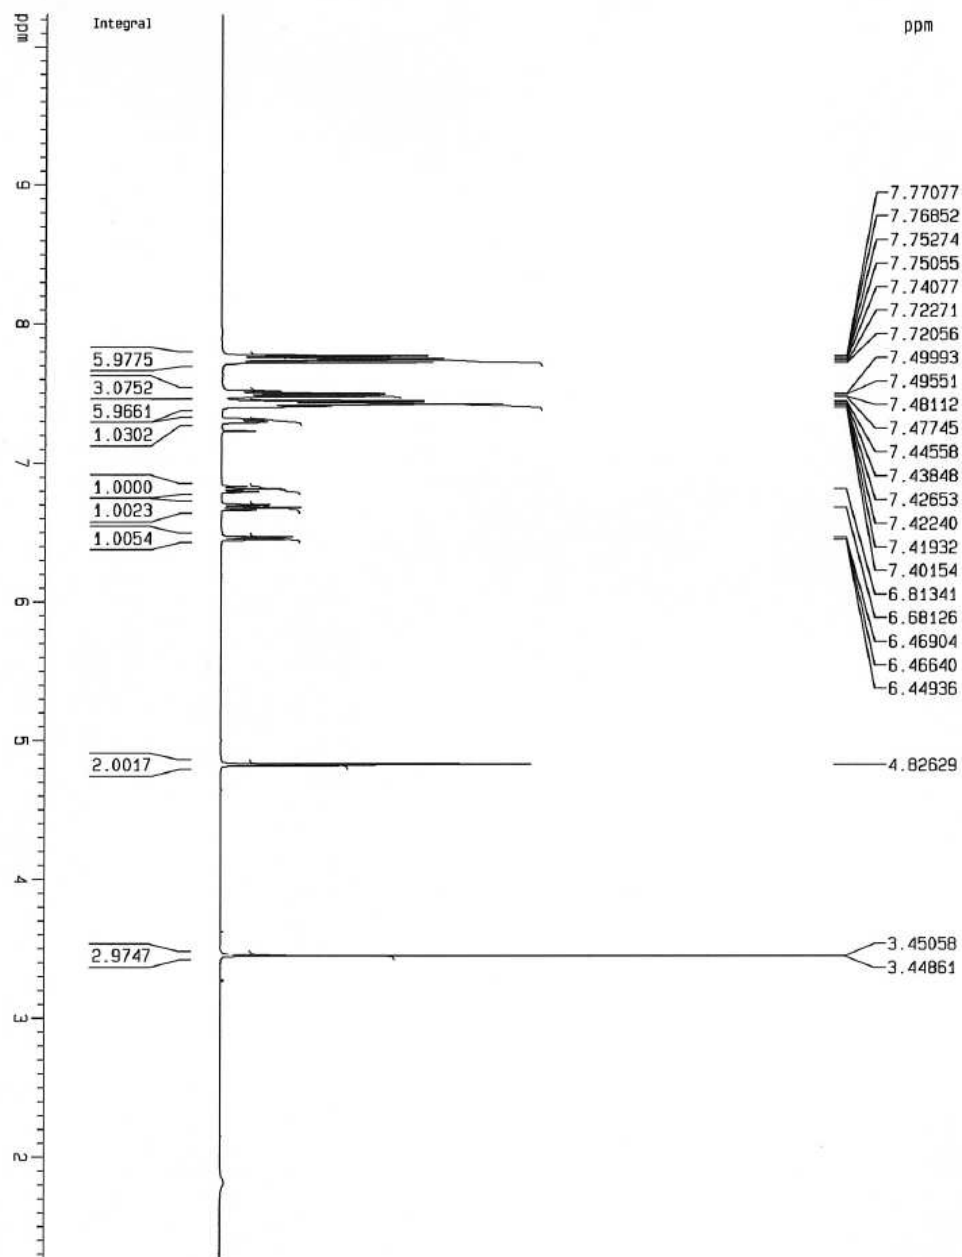

(CDCl<sub>3</sub>, 400 MHz)

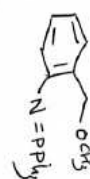

$^{13}\text{C}$  NMR 31a

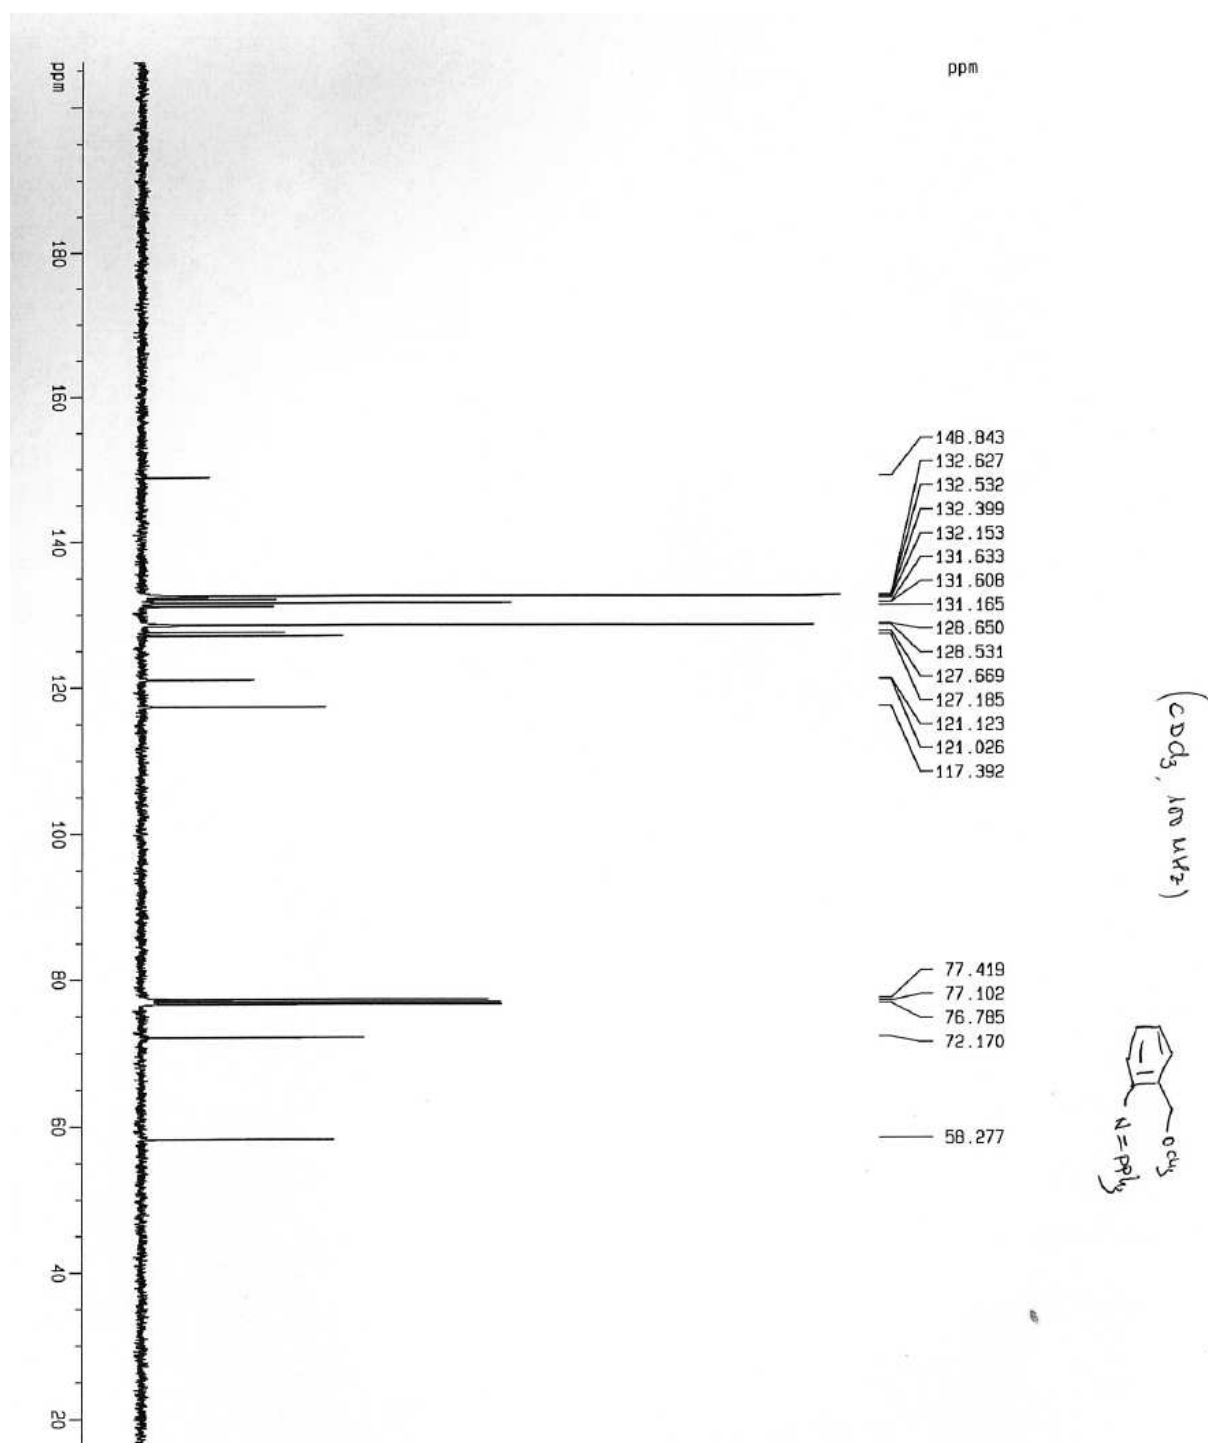

<sup>31</sup>P NMR 31a

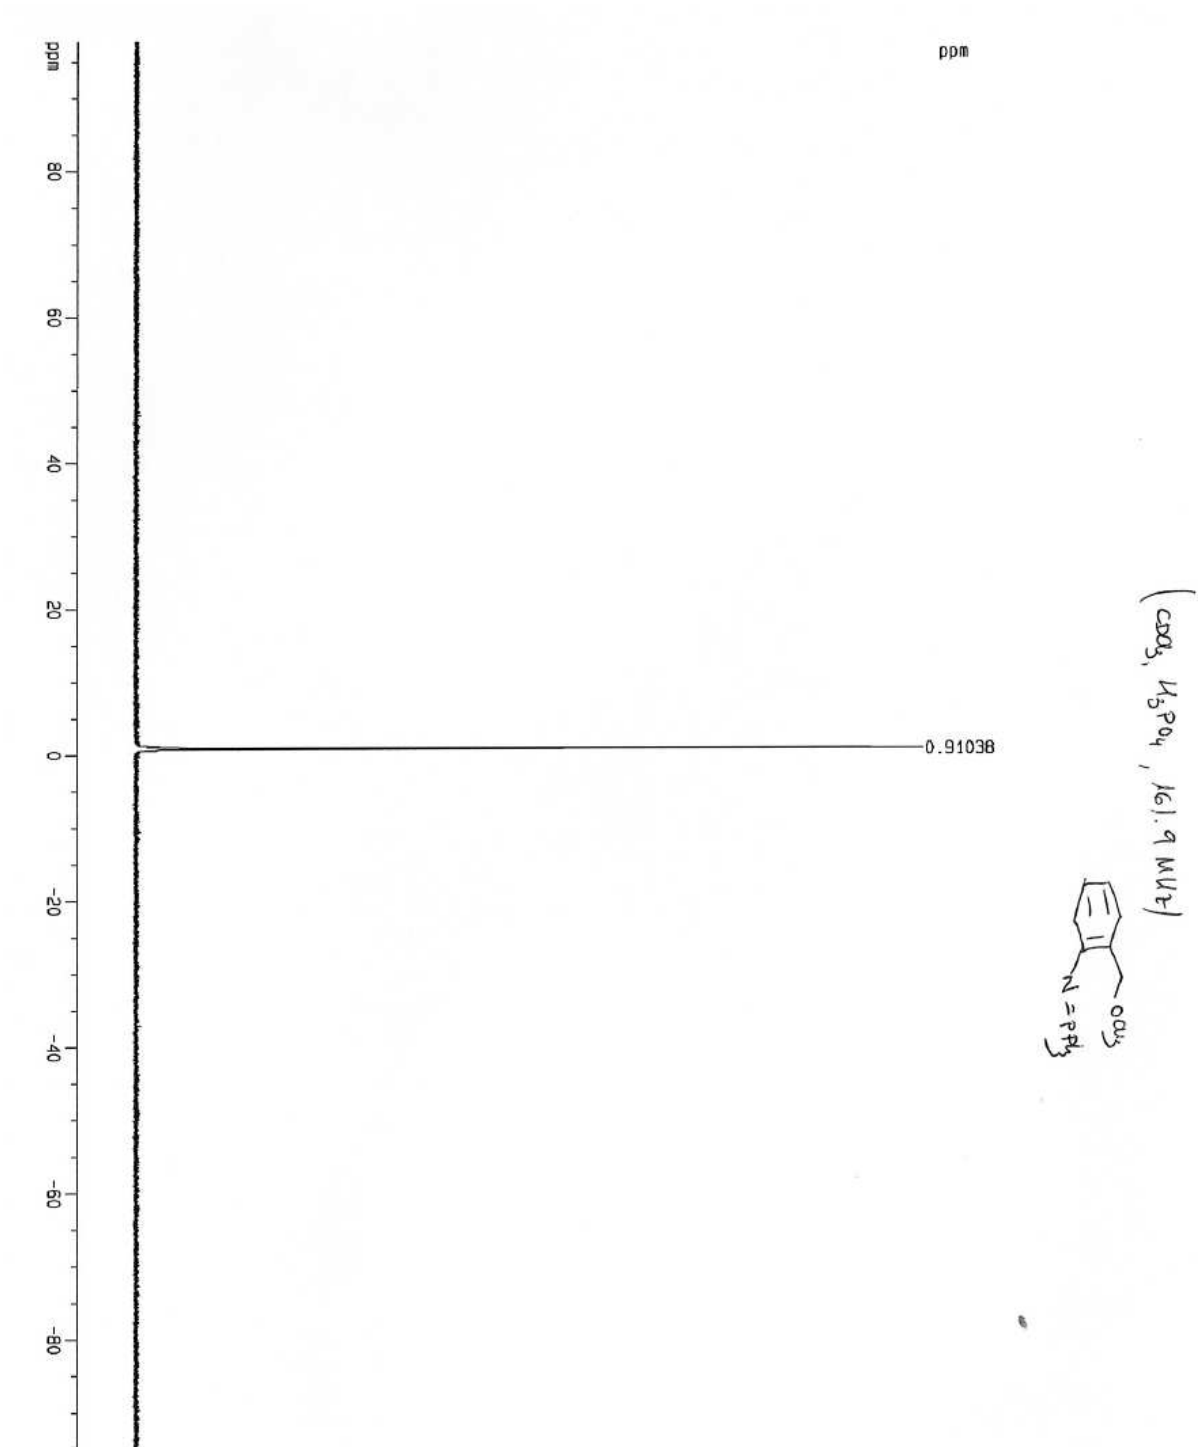

<sup>1</sup>H NMR 31b

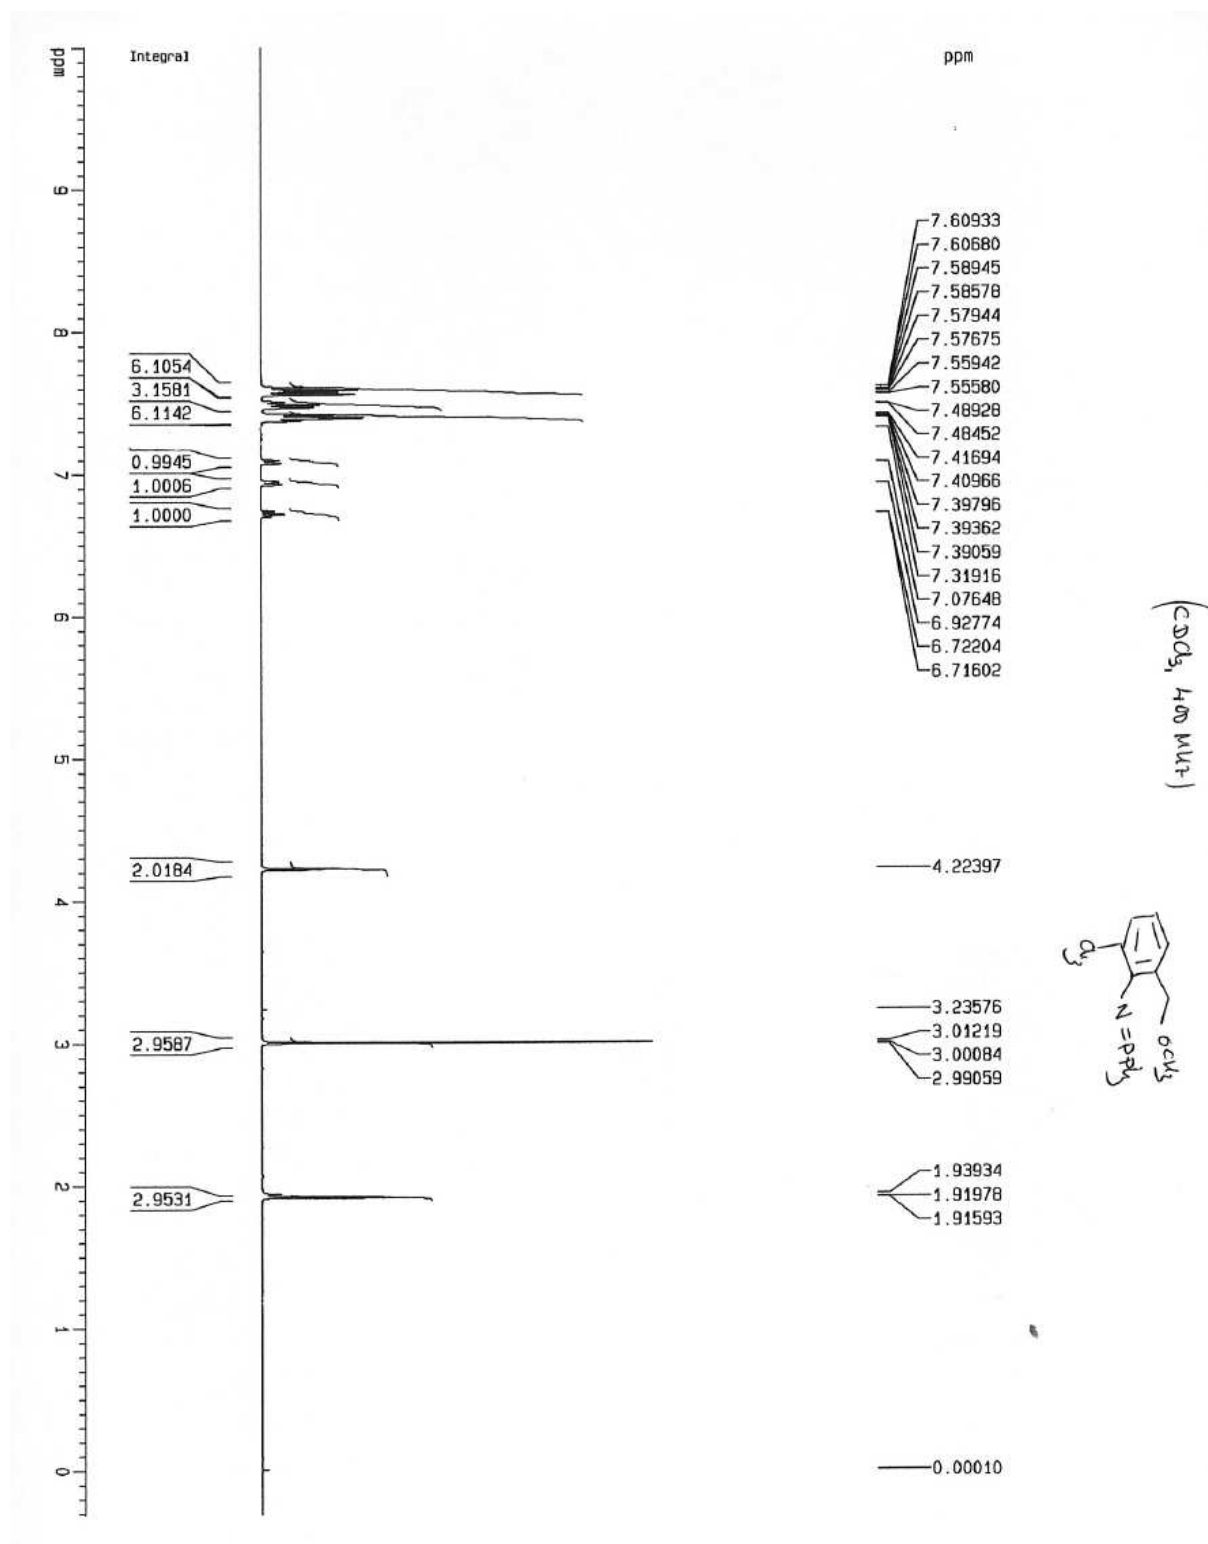

$^{13}\text{C}$  NMR 31b

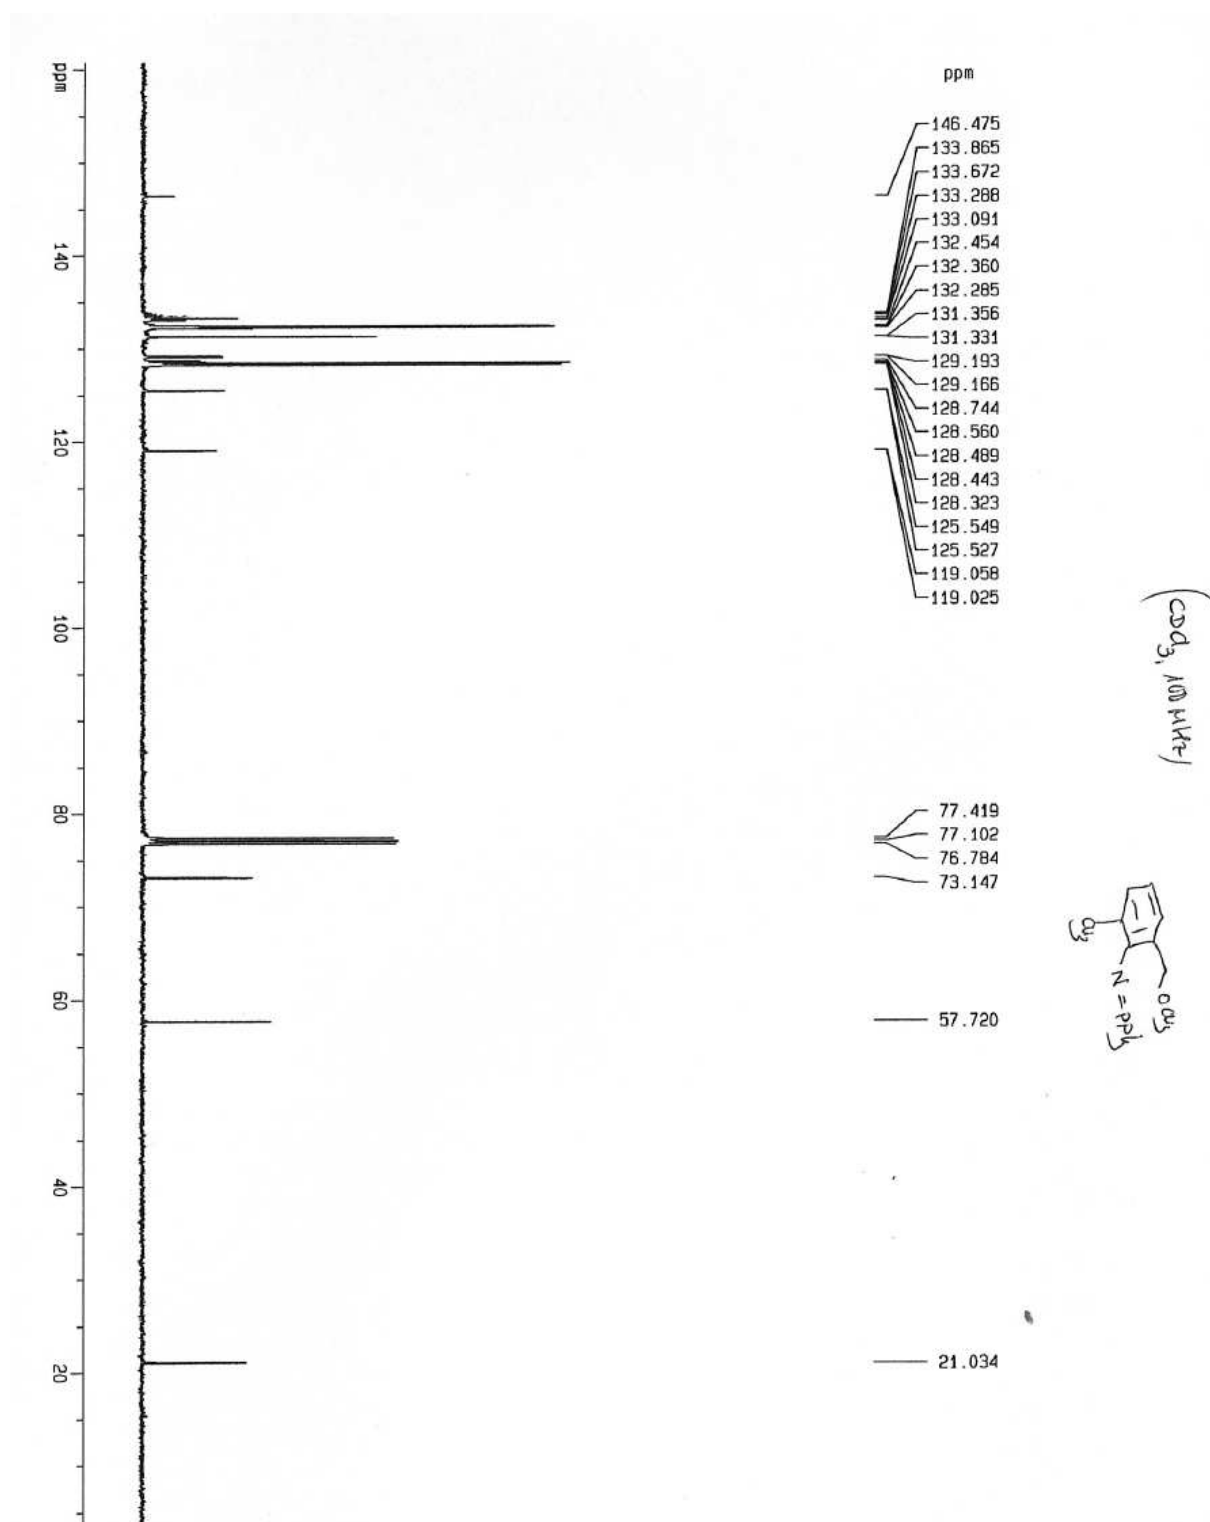

<sup>31</sup>P NMR 31b

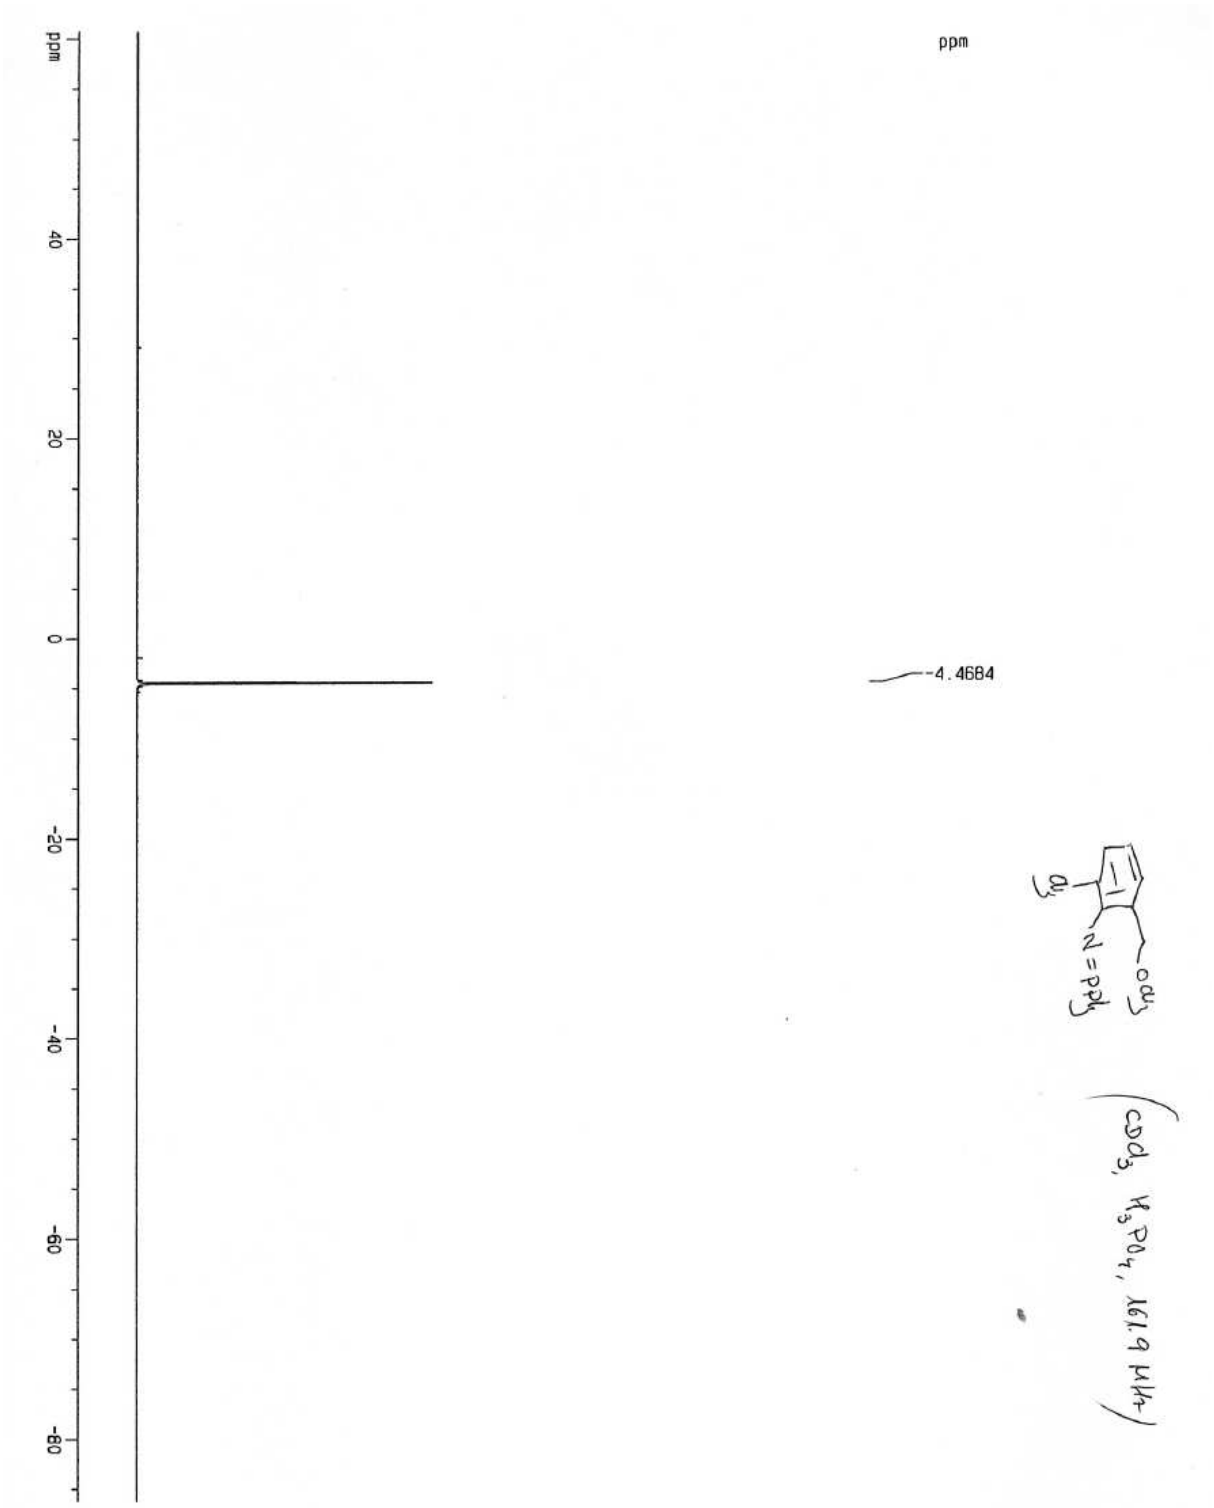



<sup>1</sup>H NMR 31c

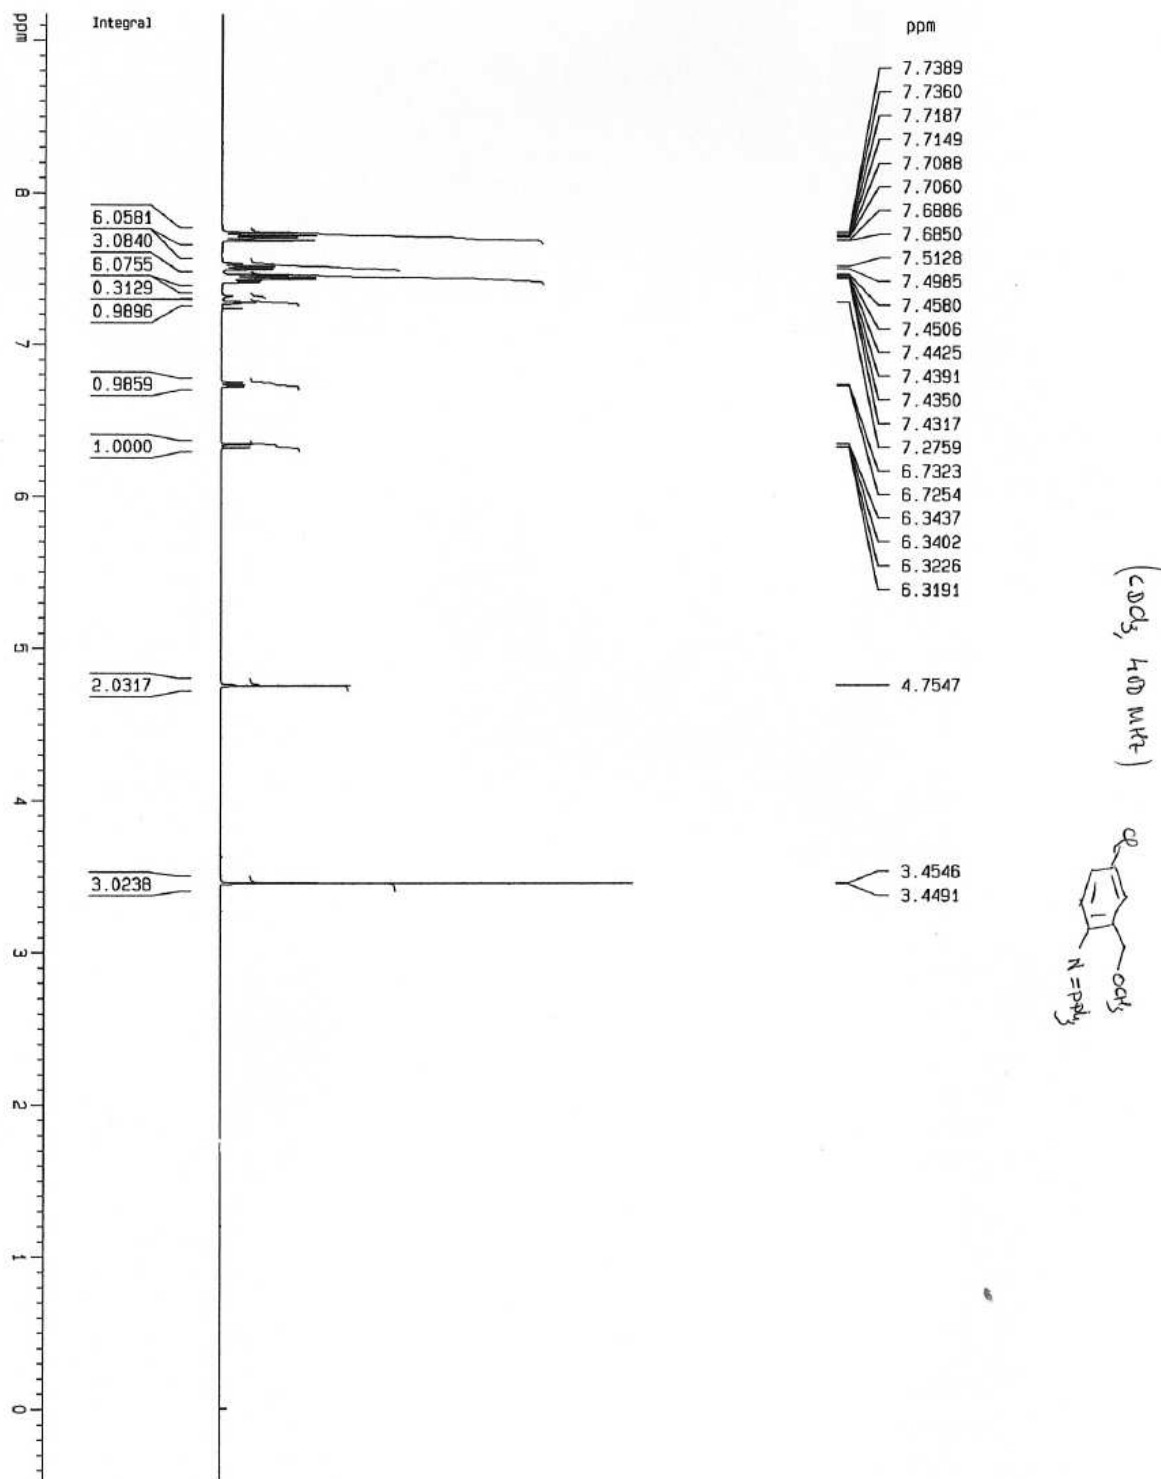

$^{13}\text{C}$  NMR **31c**

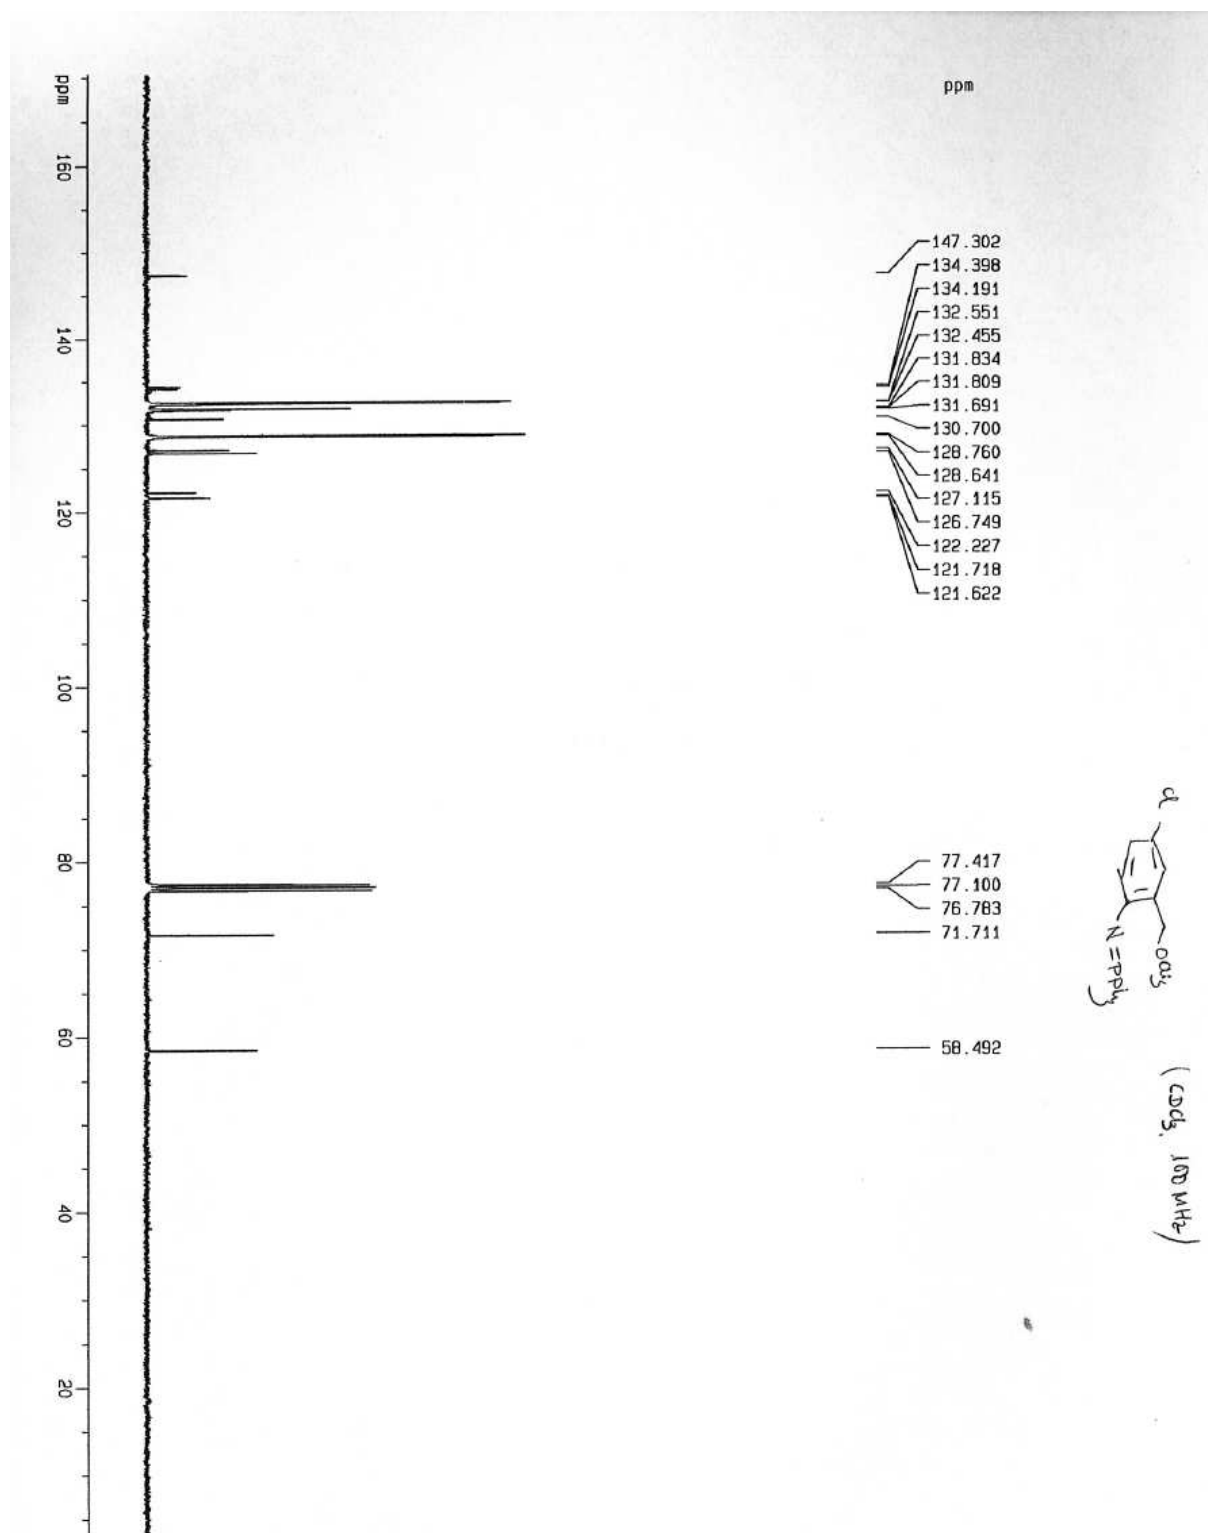

<sup>31</sup>P NMR 31c

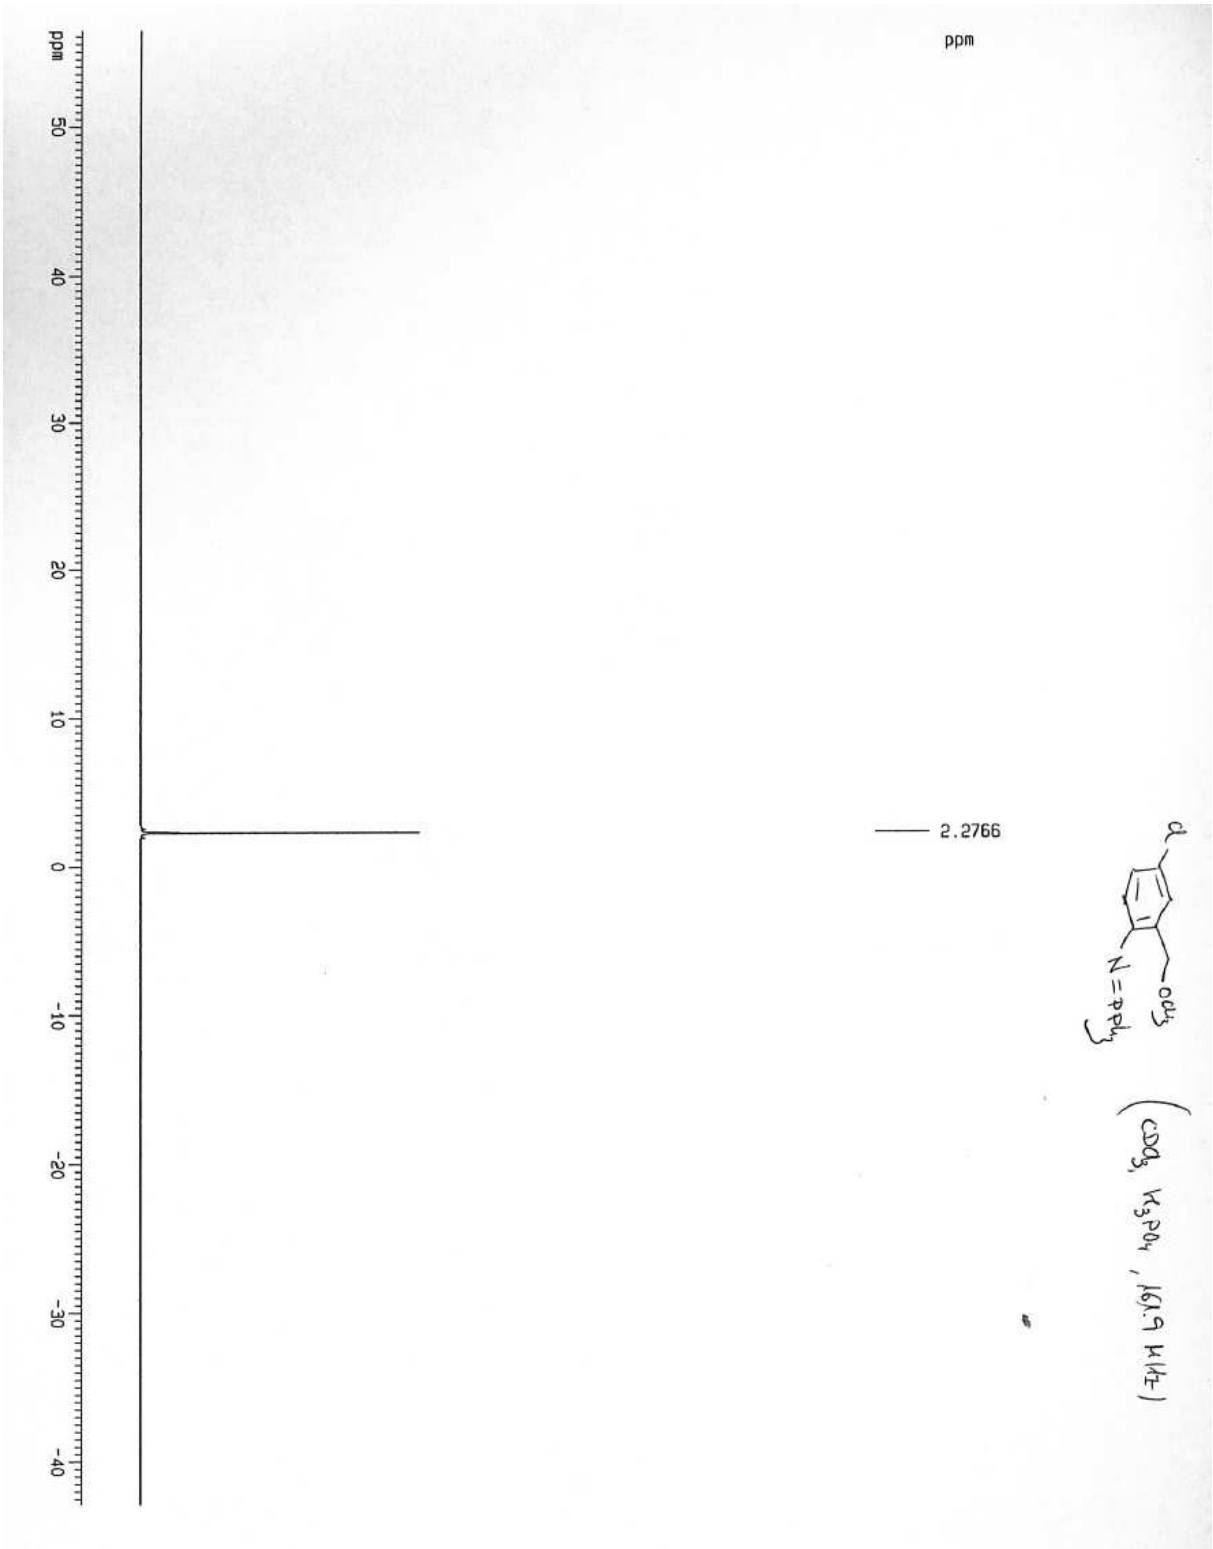

<sup>1</sup>H NMR 31d

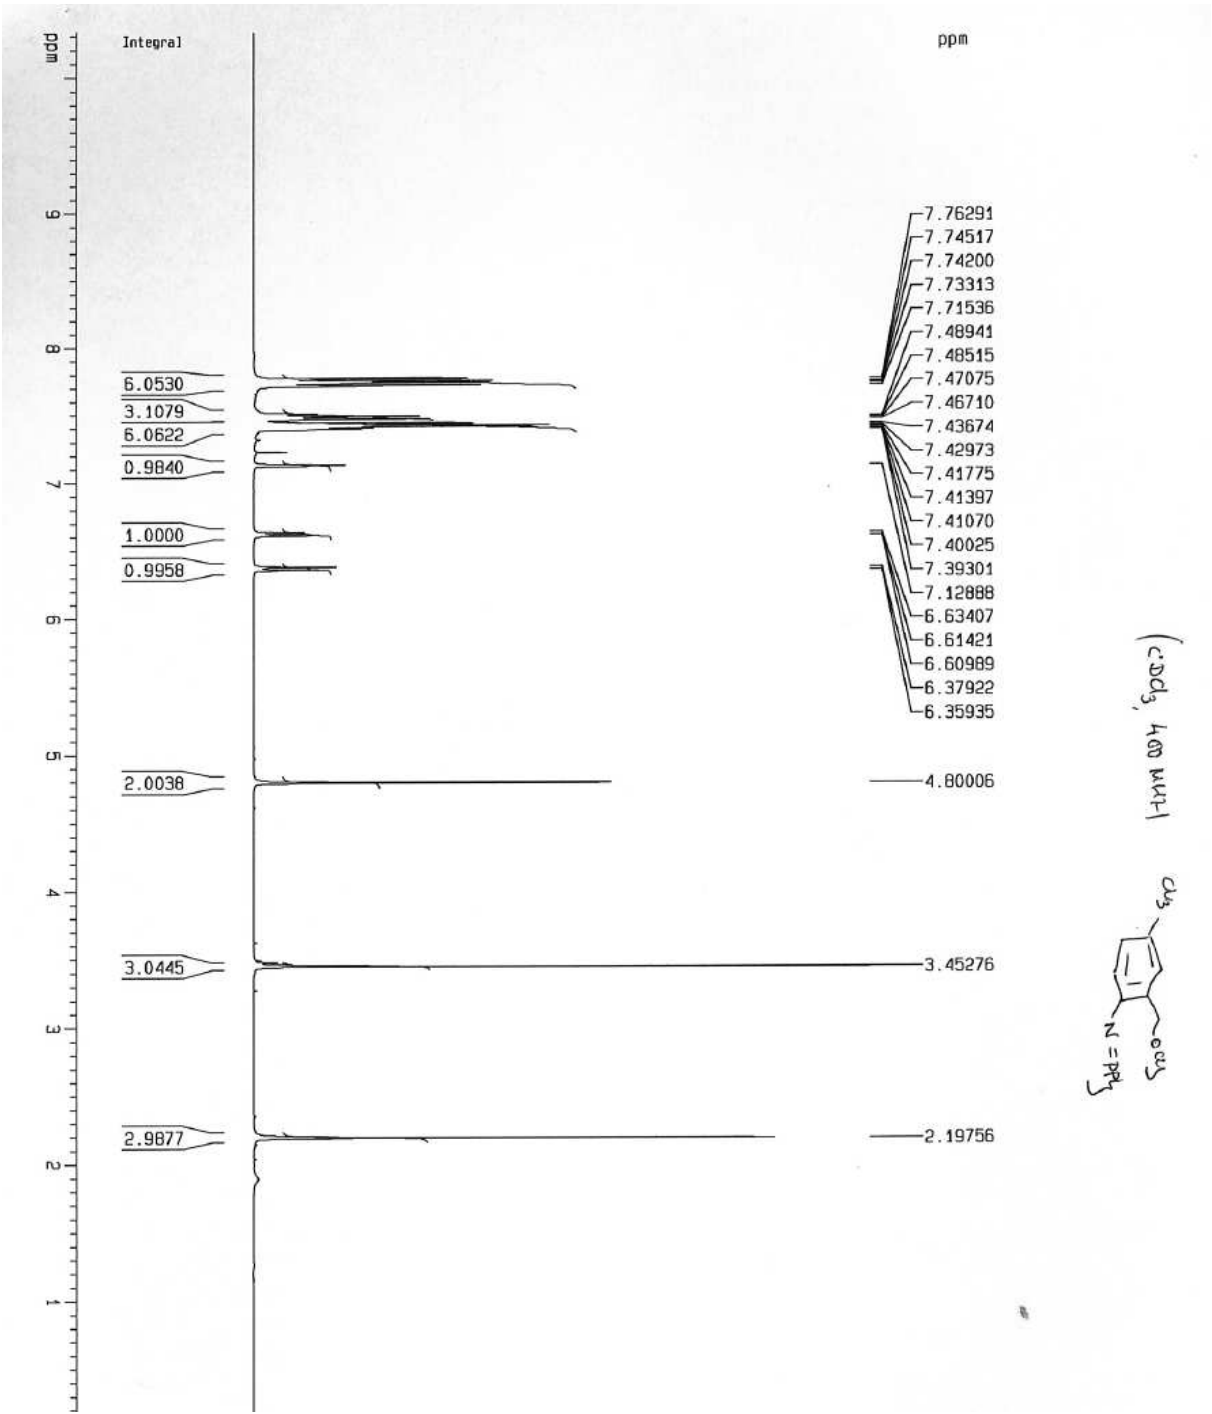

$^{13}\text{C}$  NMR 31d

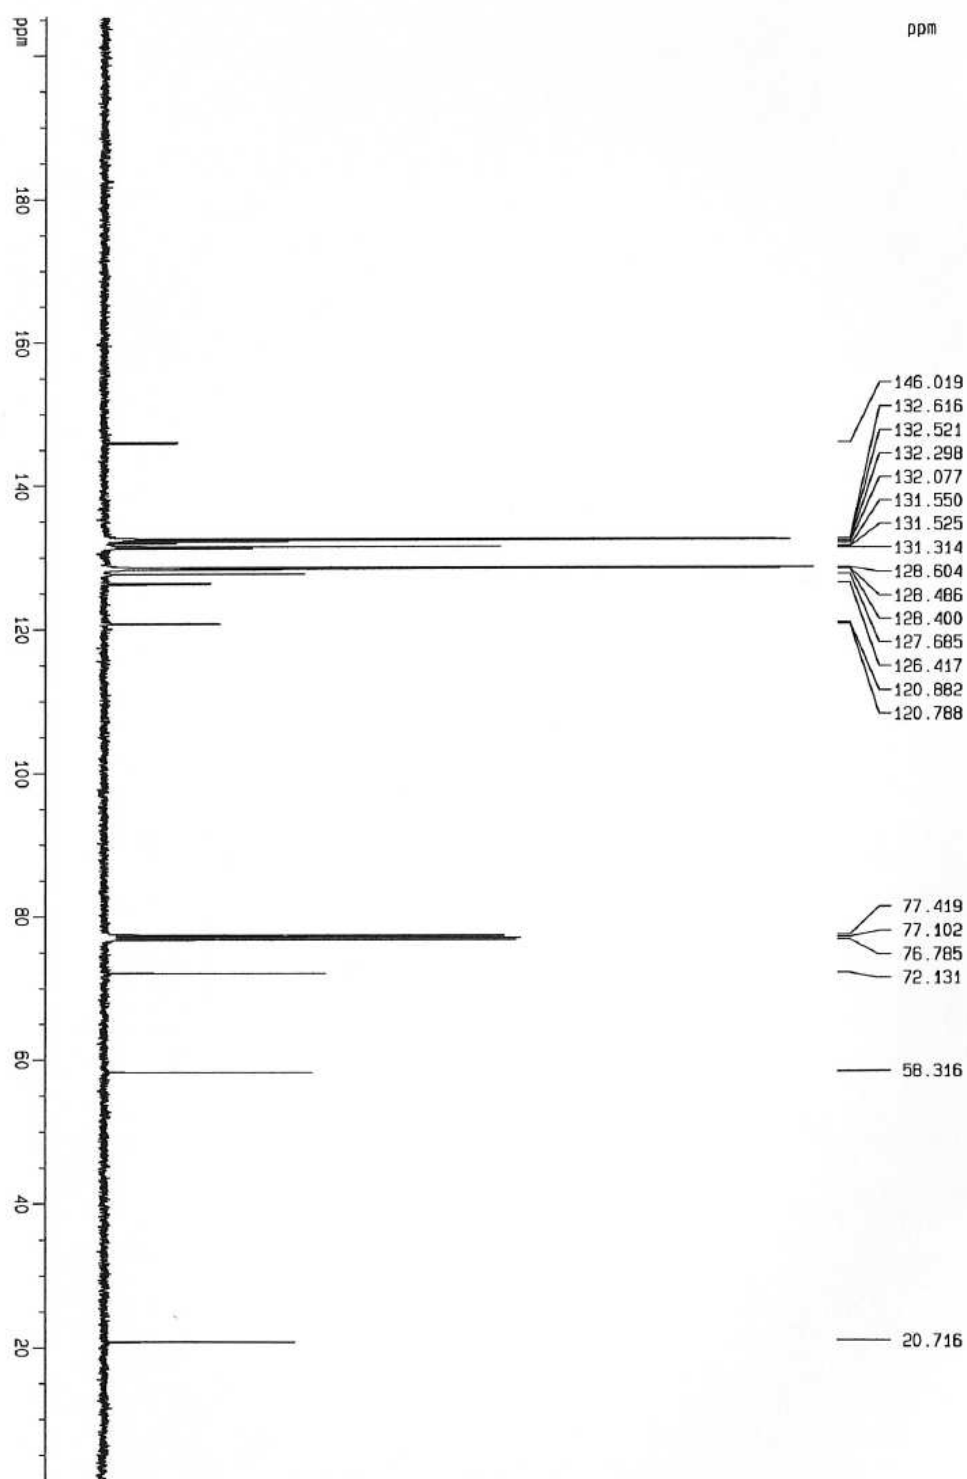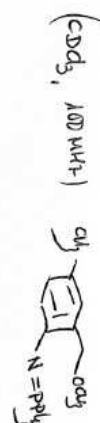

<sup>31</sup>P NMR 31d

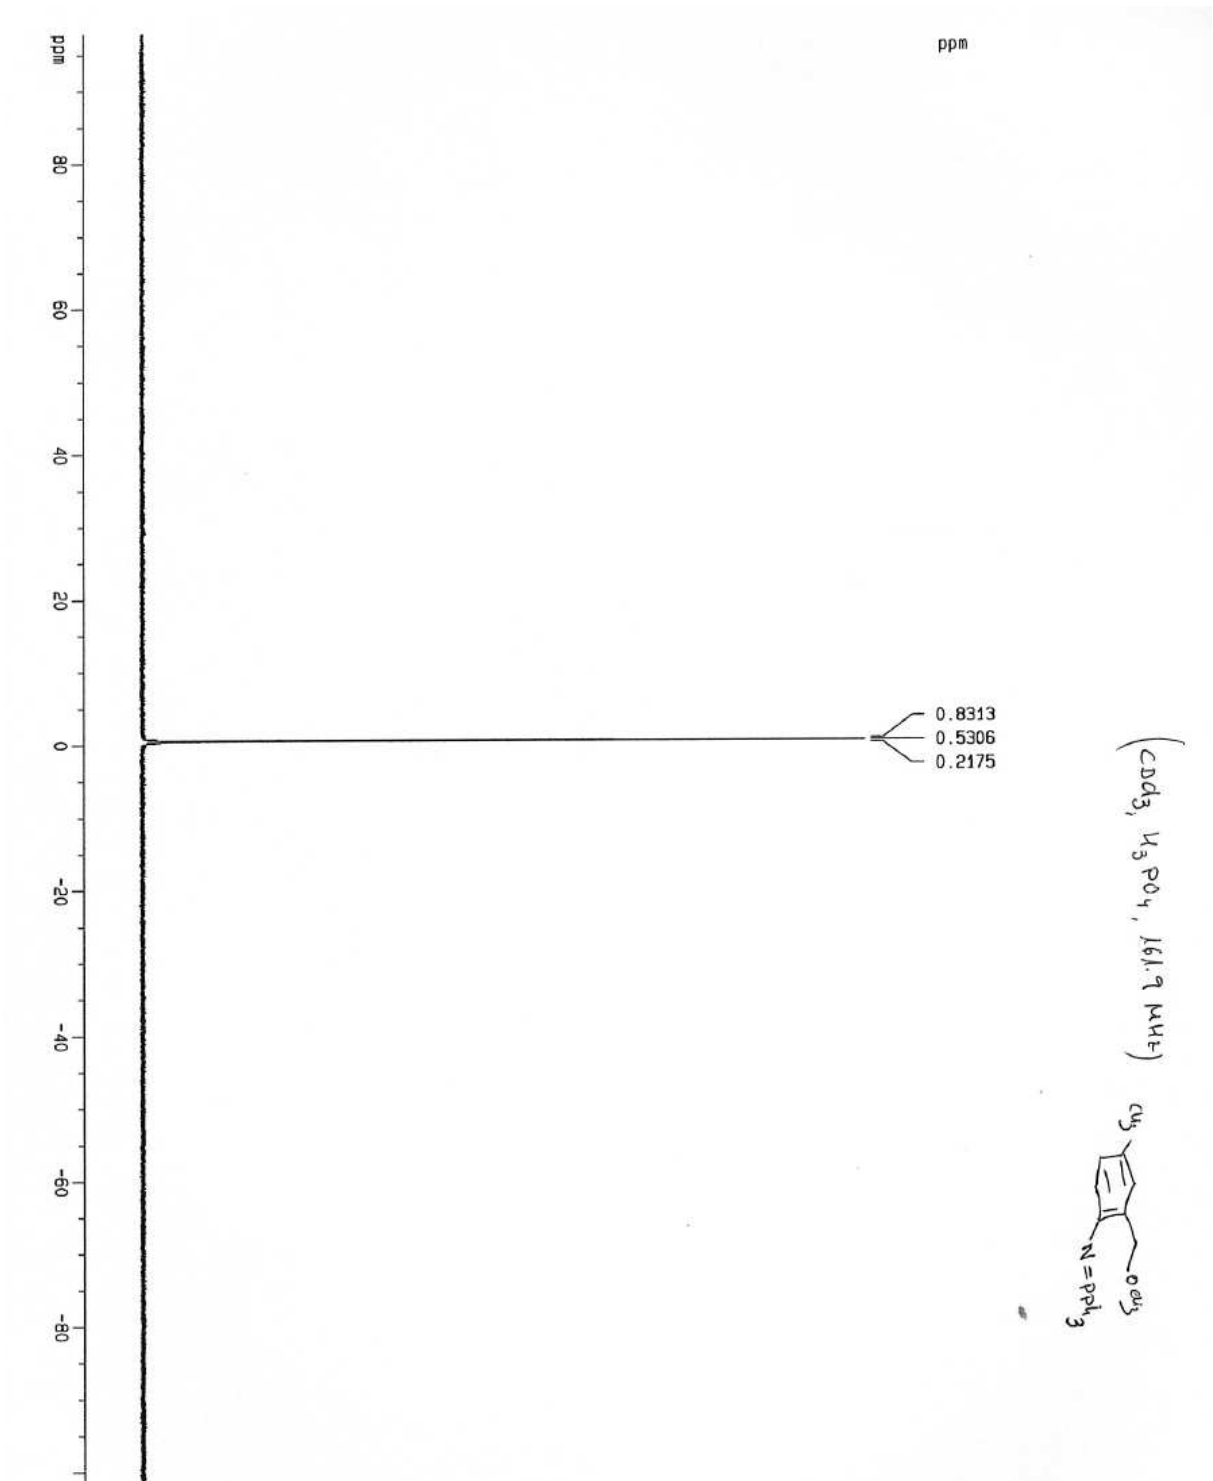

<sup>1</sup>H NMR **34a**

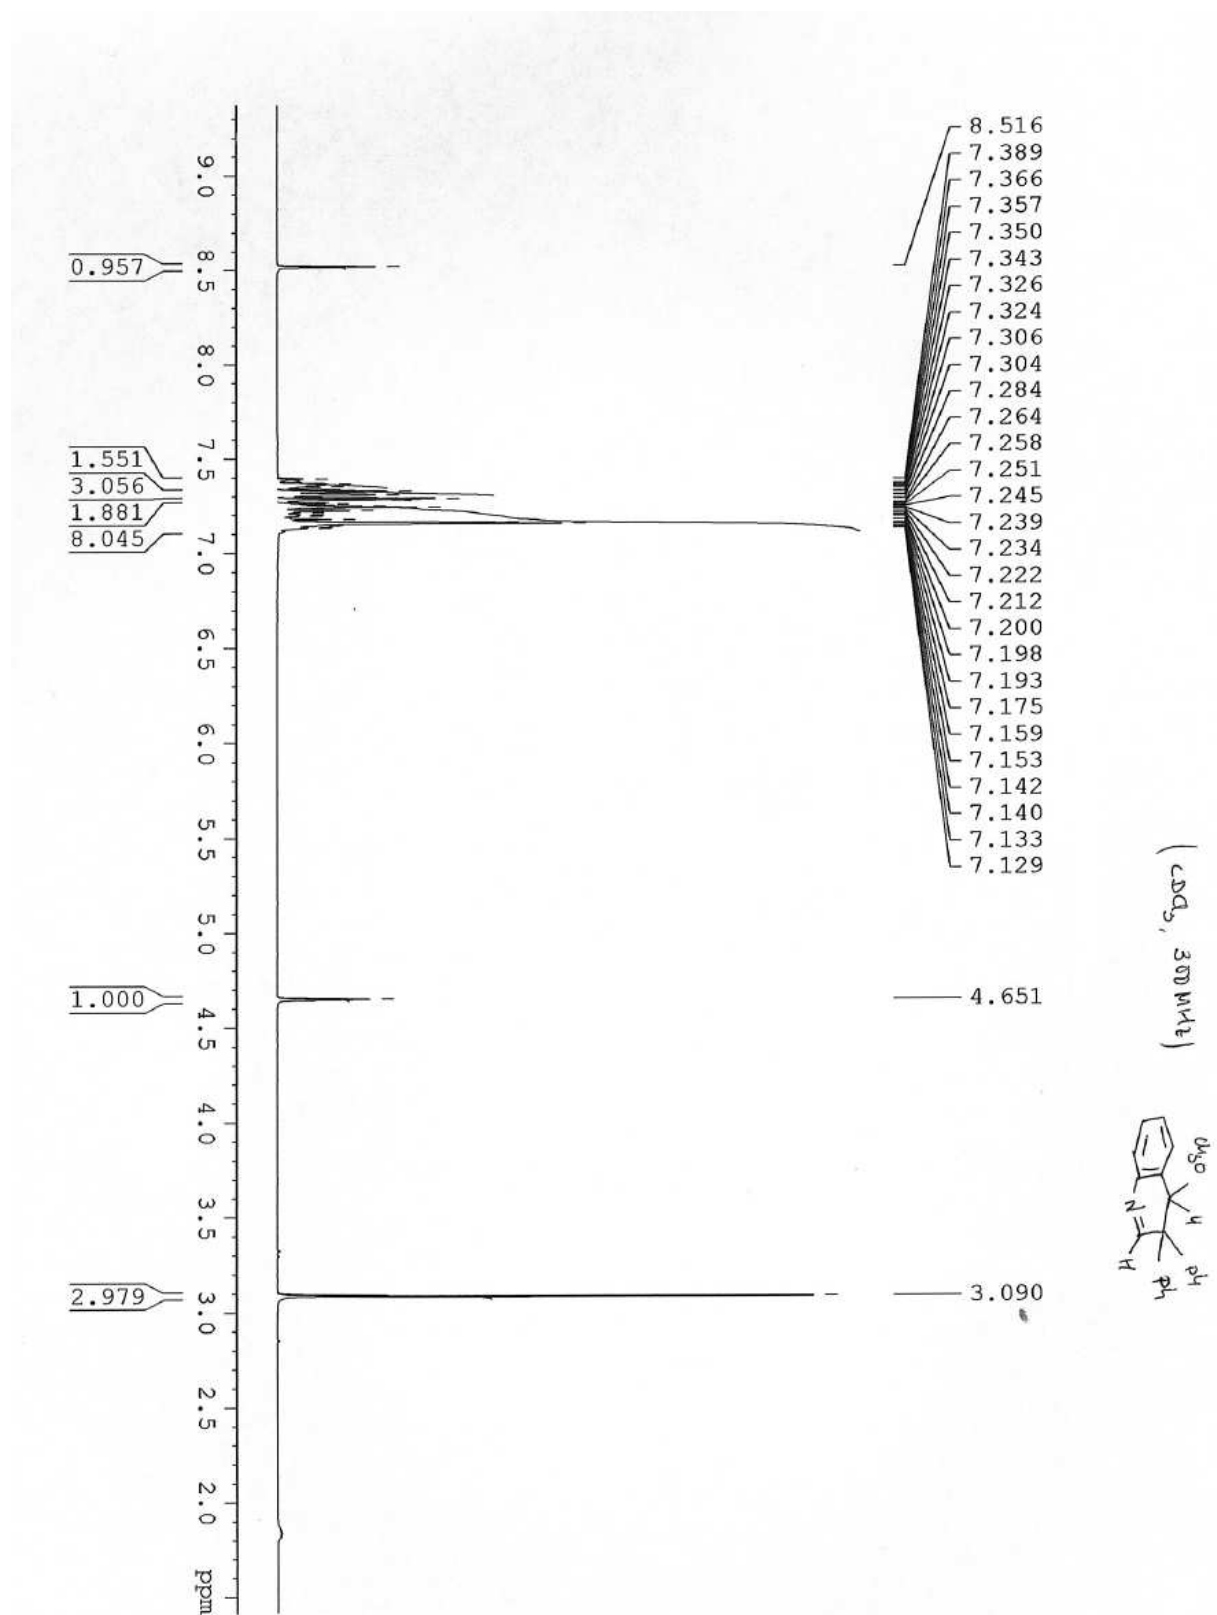

$^{13}\text{C}$  NMR **34a**

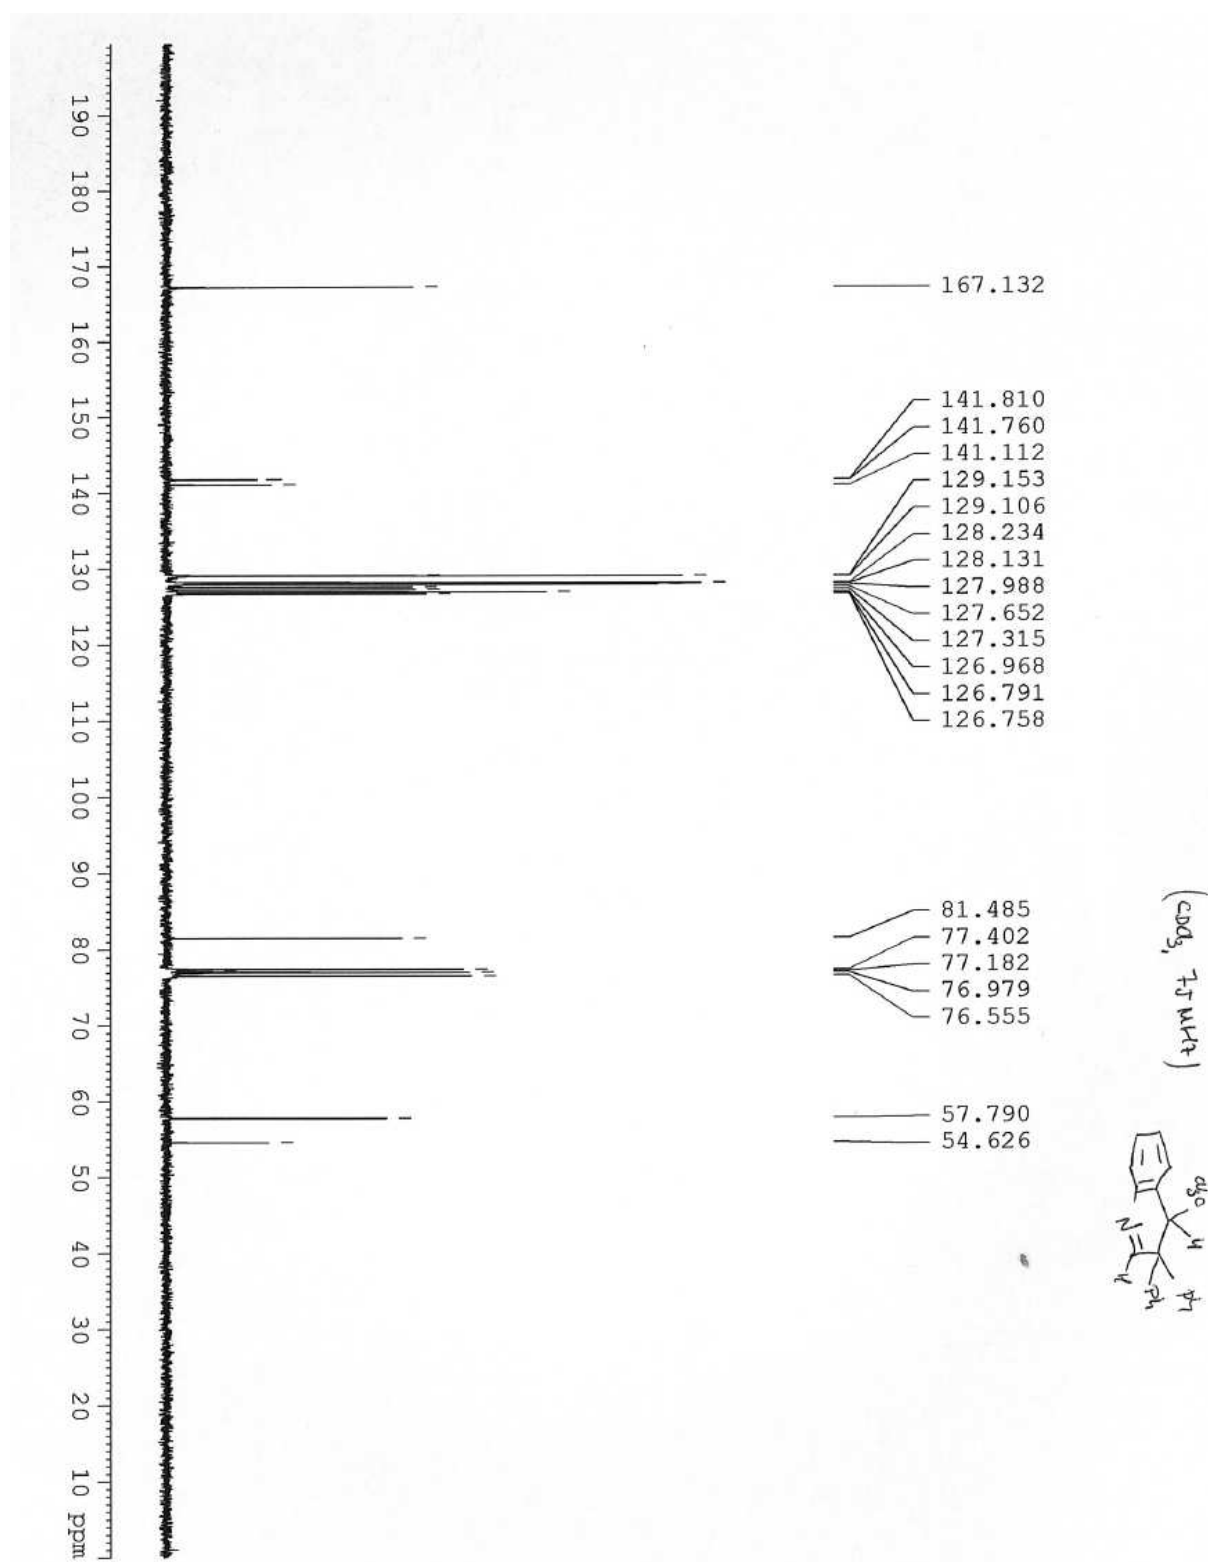



<sup>1</sup>H NMR **34b**

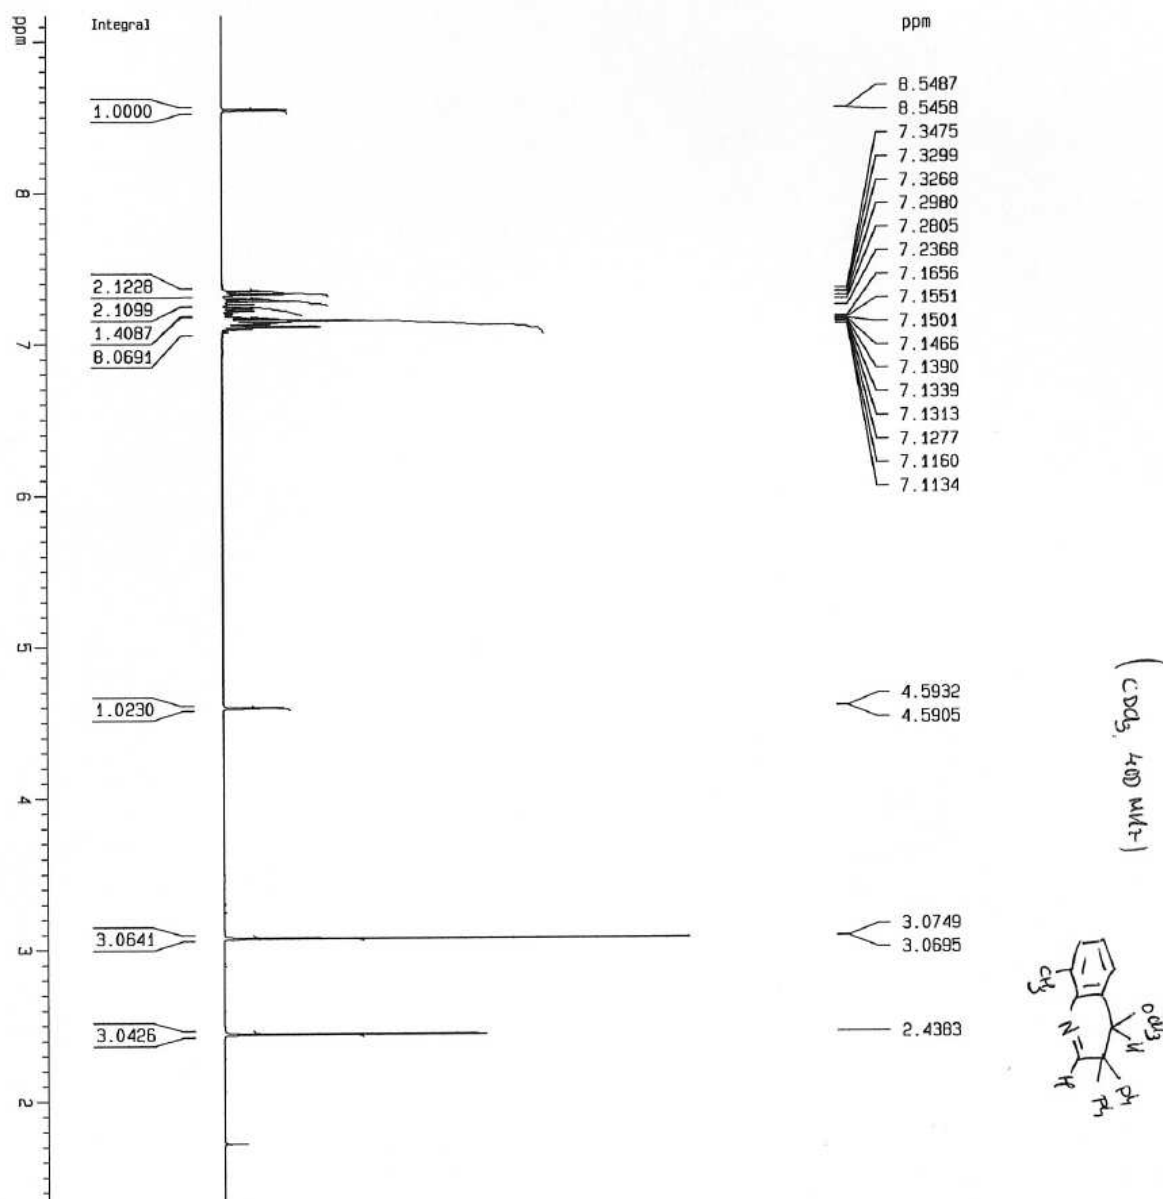

$^{13}\text{C}$  NMR **34b**

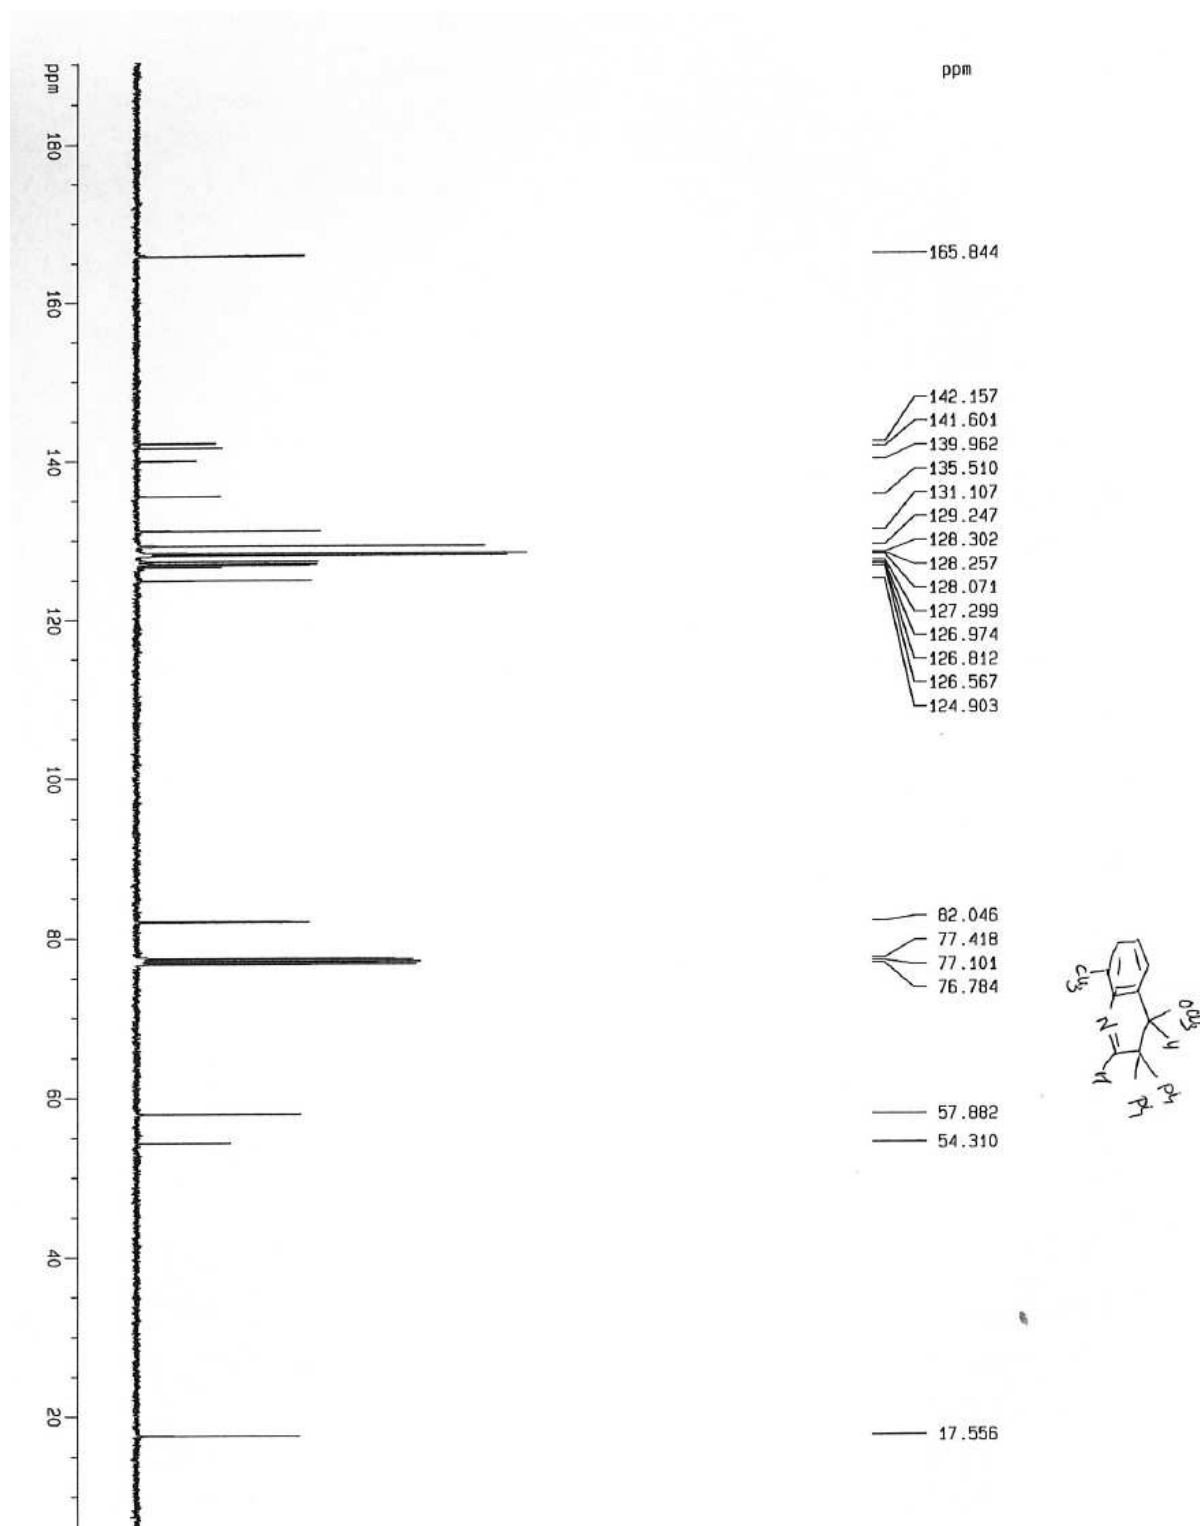

<sup>1</sup>H NMR 34c

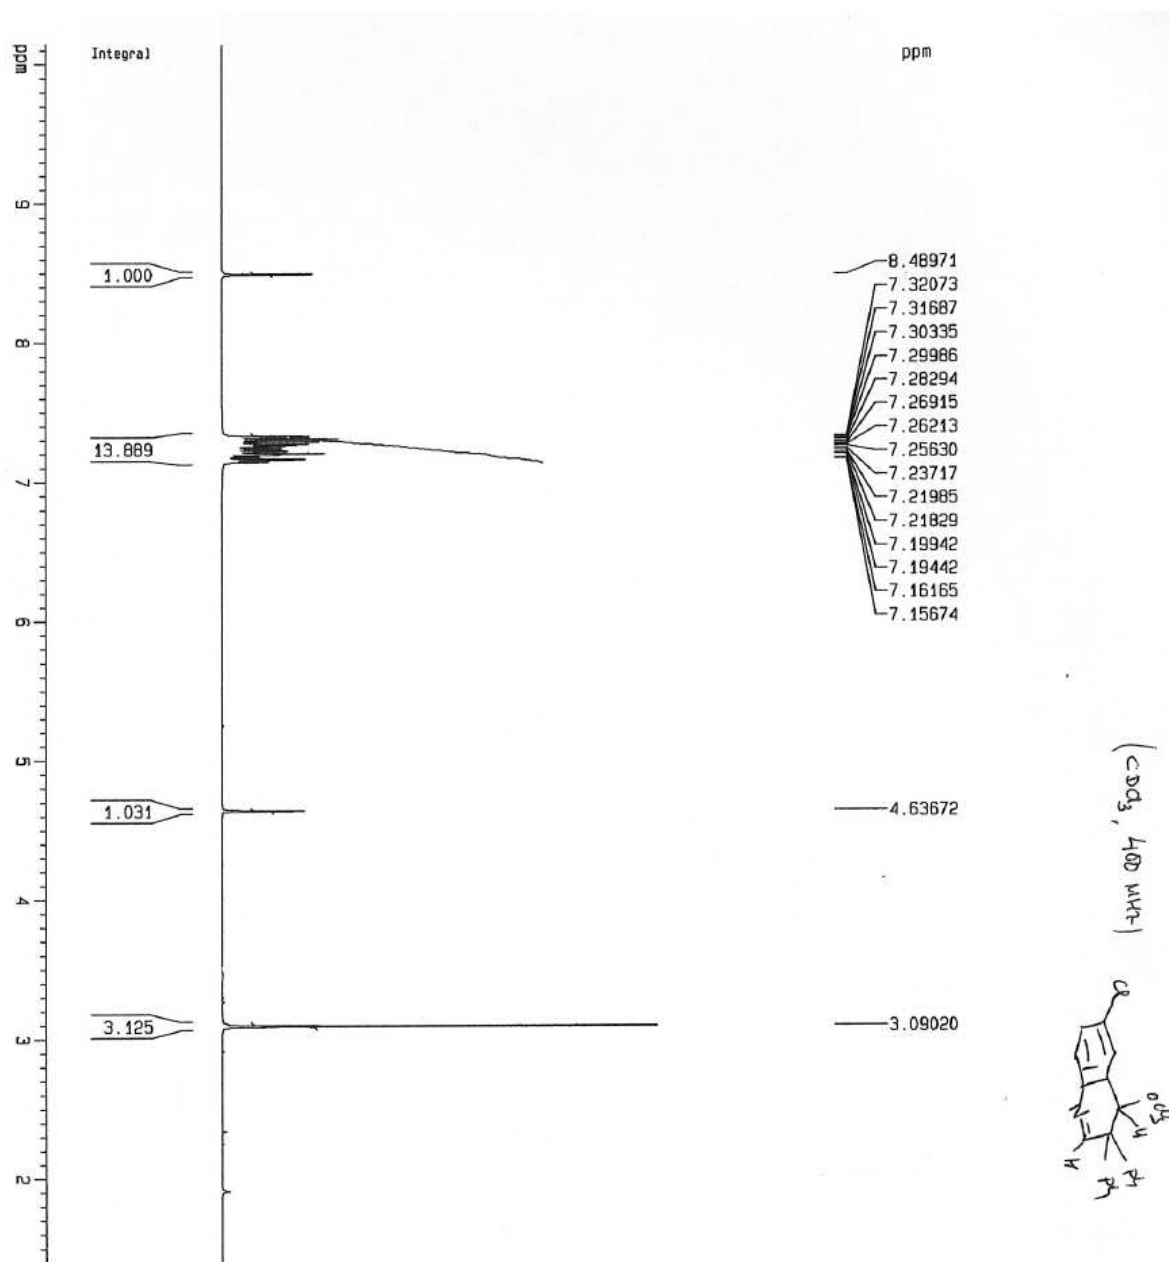

$^{13}\text{C}$  NMR **34c**

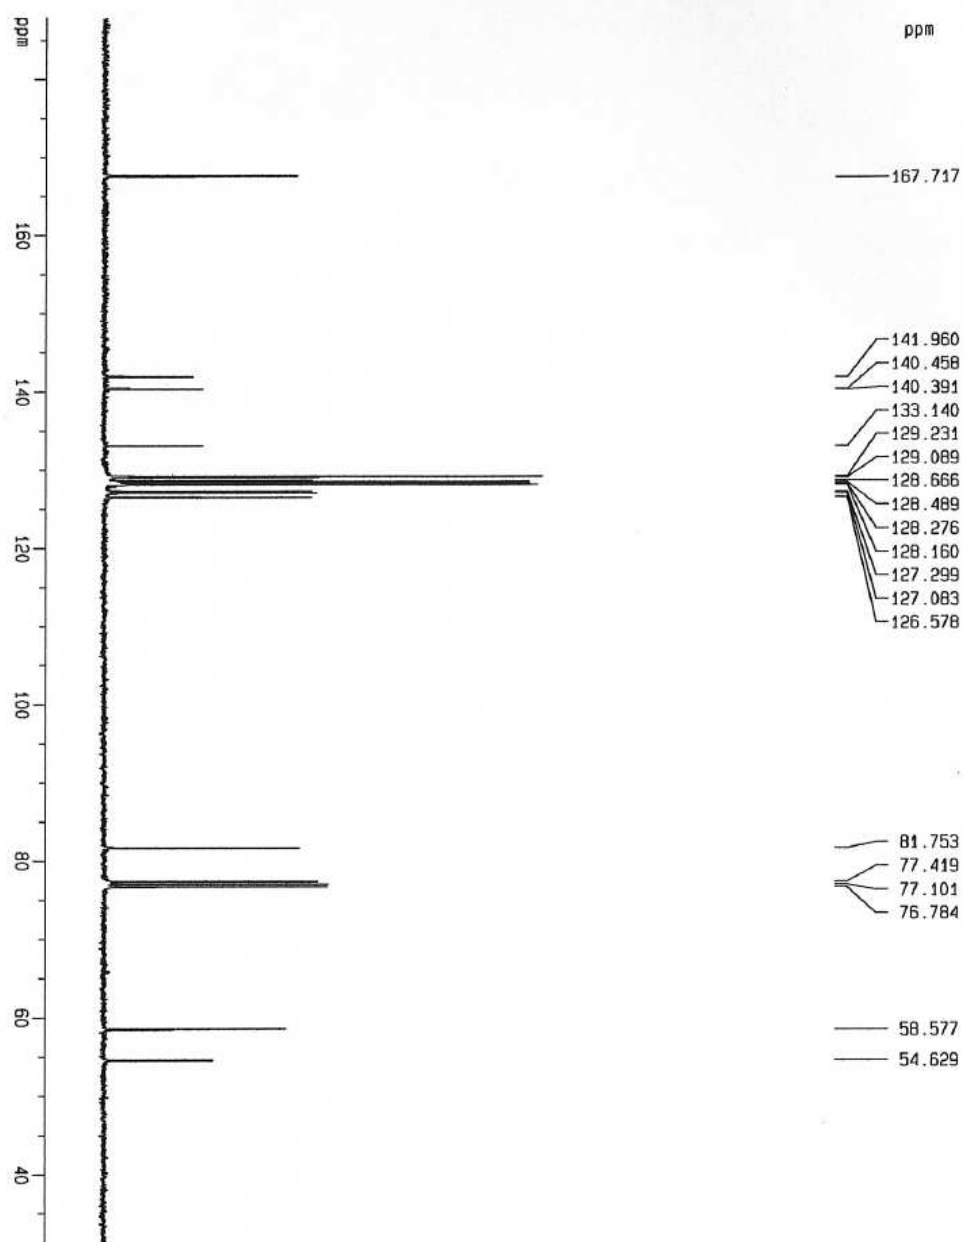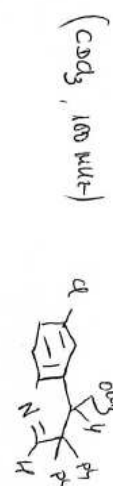

<sup>1</sup>H NMR 34d

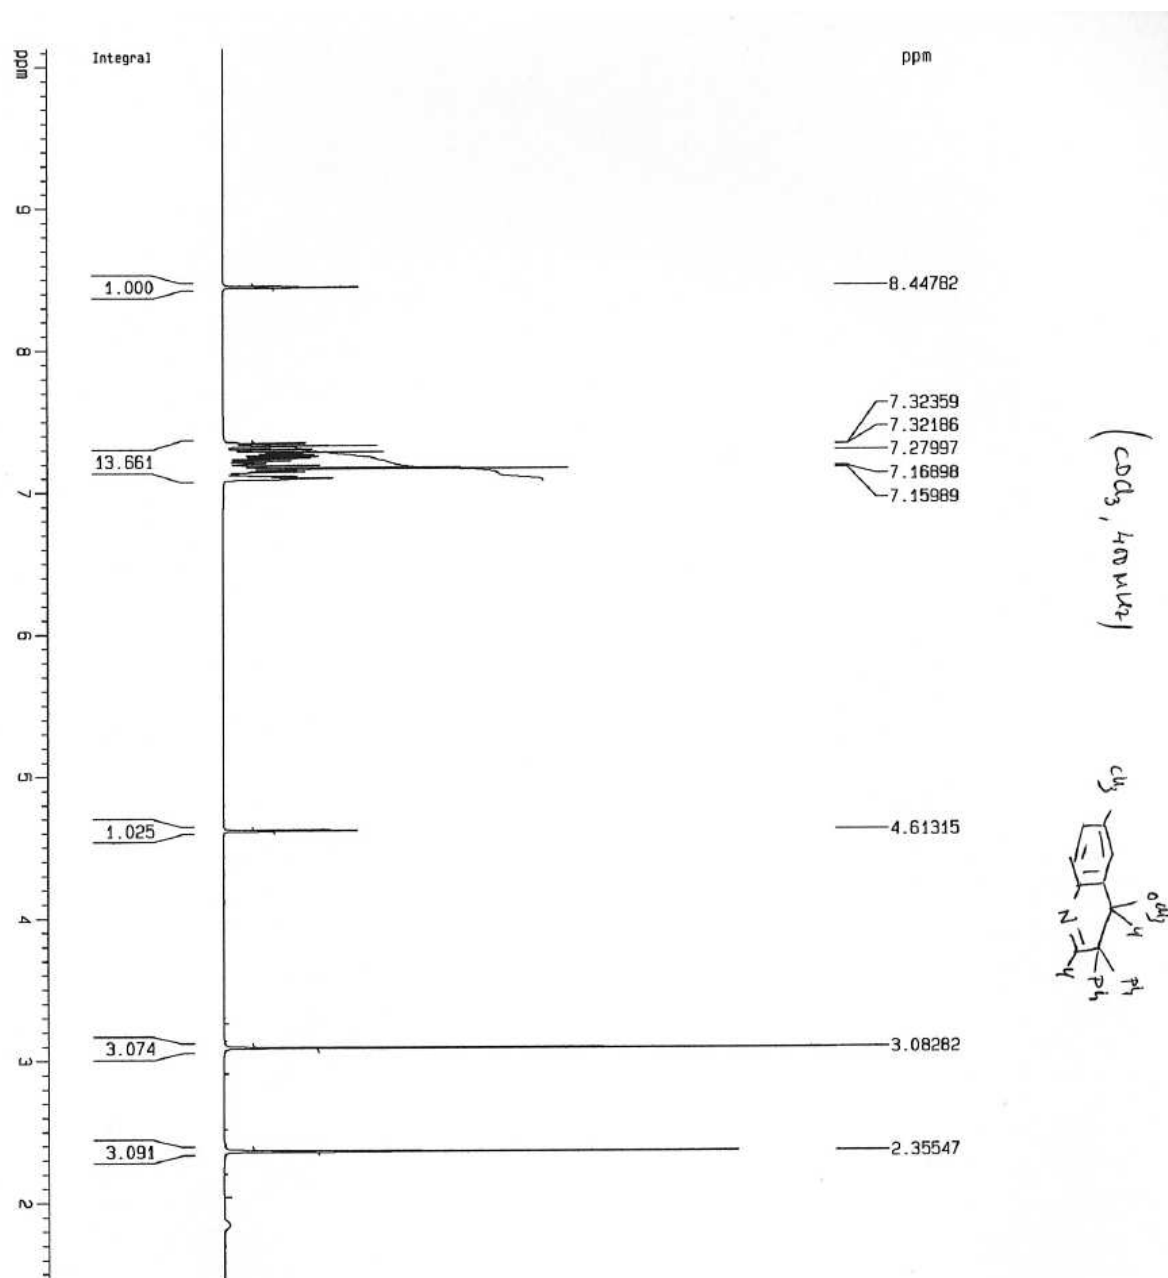

<sup>13</sup>C NMR 34d

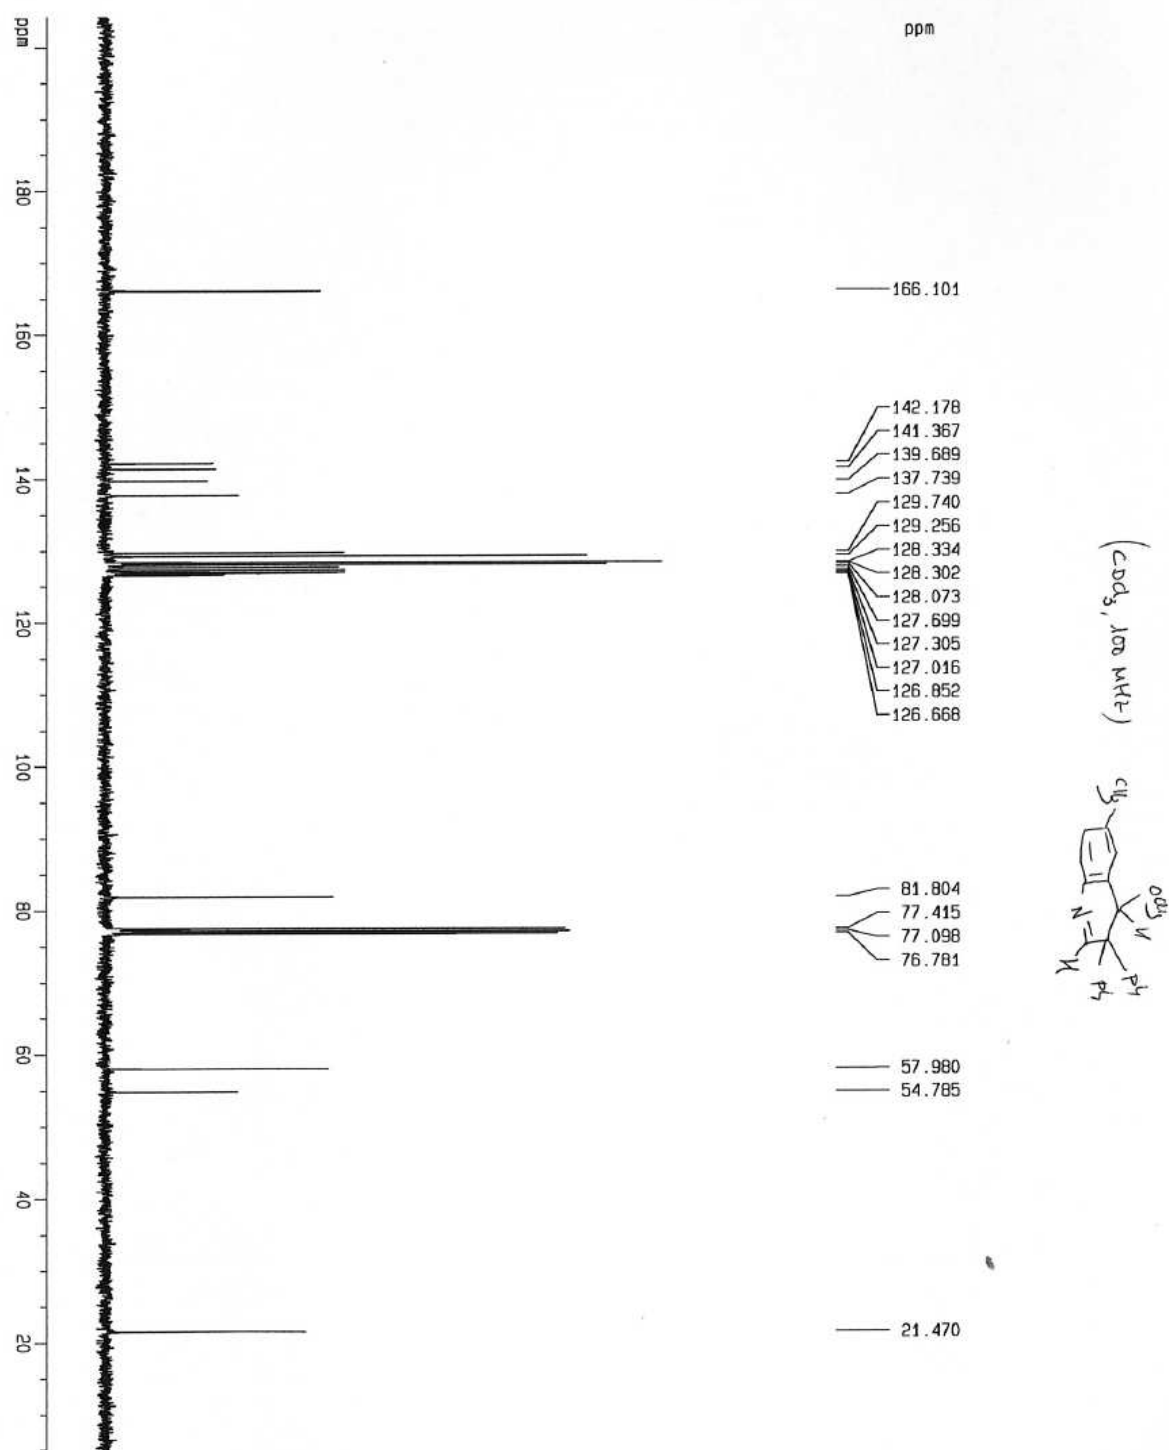

$^1\text{H}$  NMR of *cis*-**34e** + *trans*-**34e**

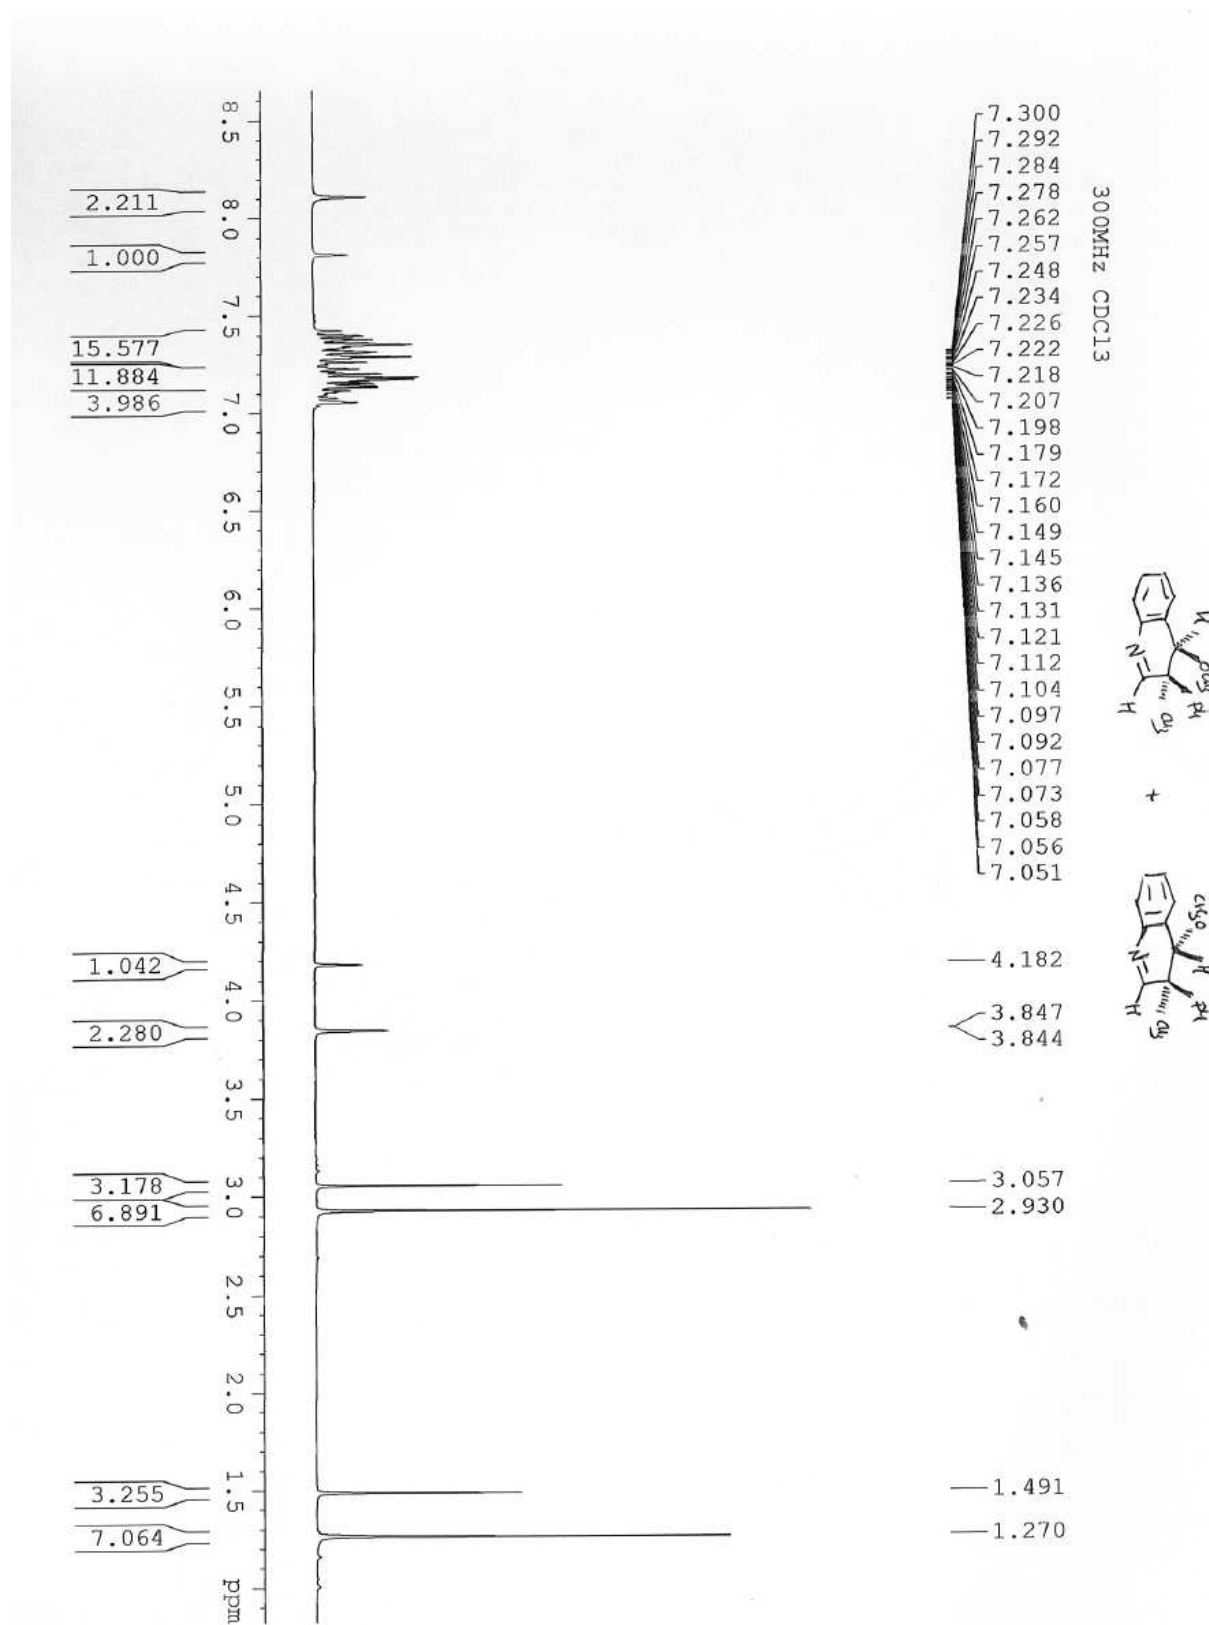

$^{13}\text{C}$  NMR of *cis*-34e + *trans*-34e

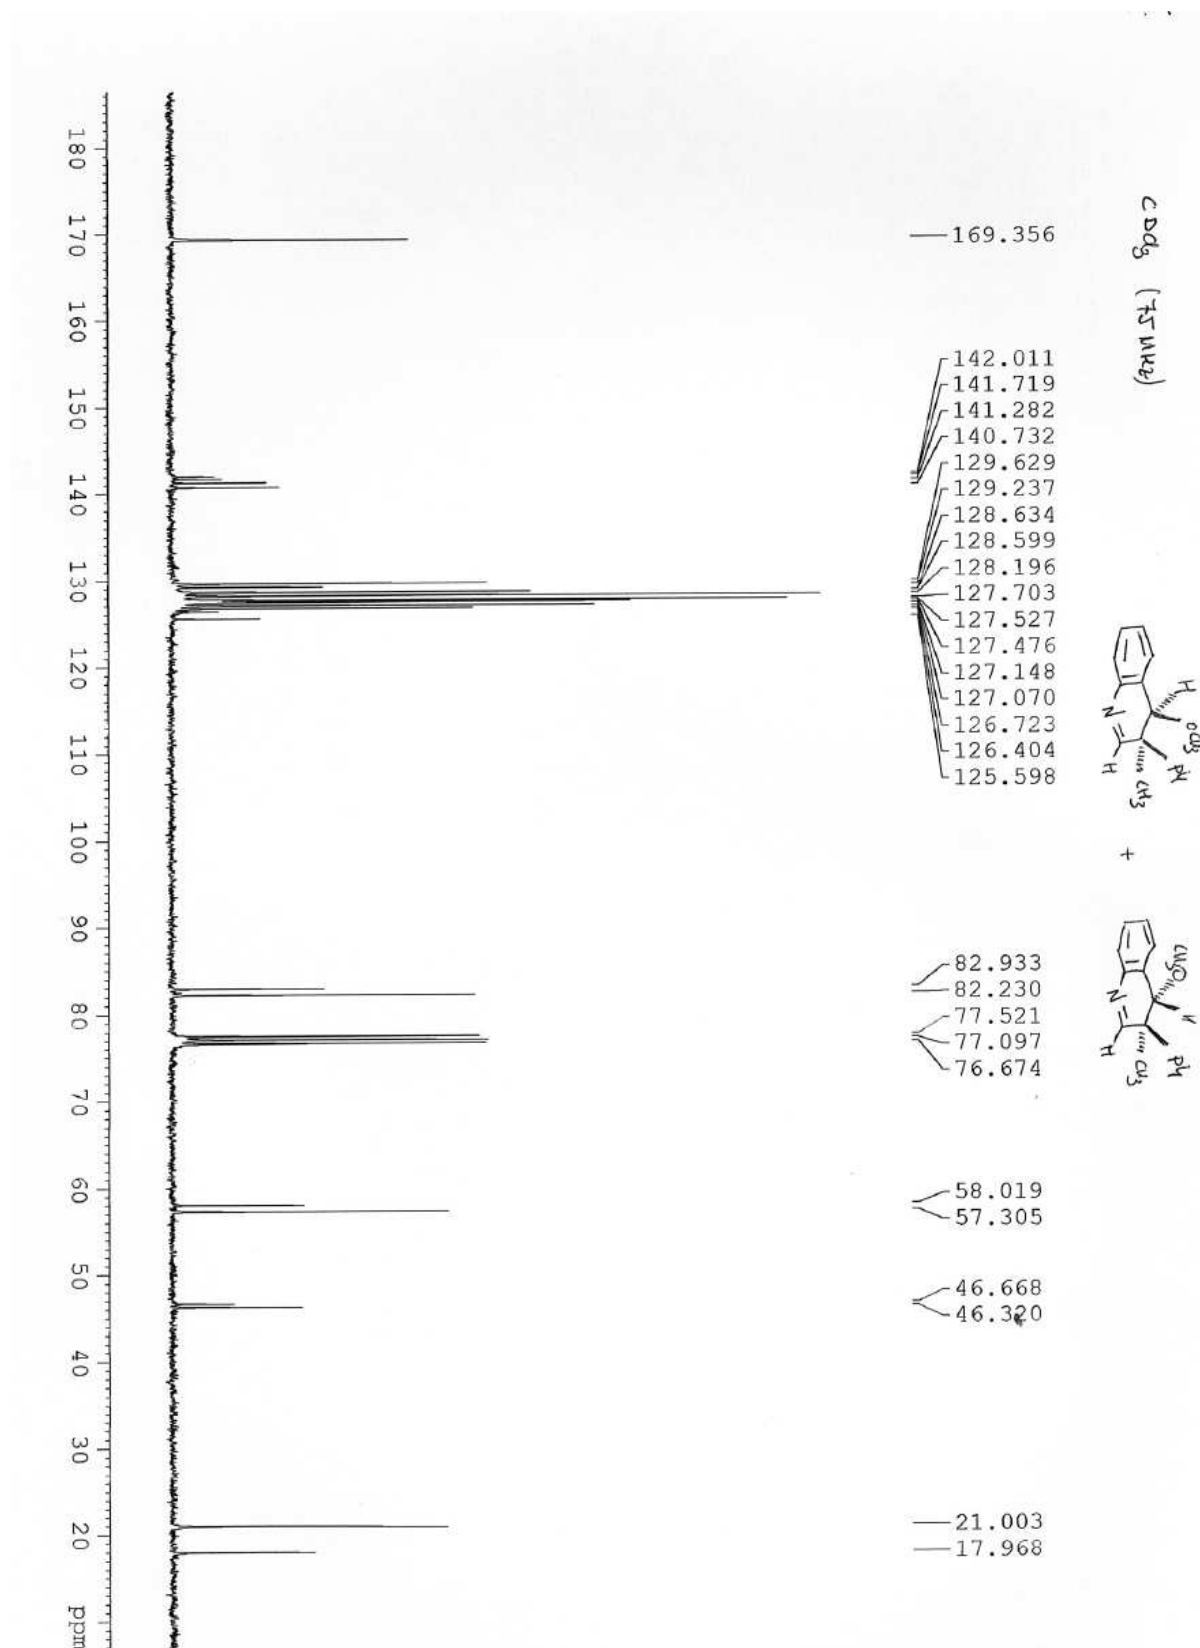



$^1\text{H}$  NMR of *cis*-**34f** + *trans*-**34f**

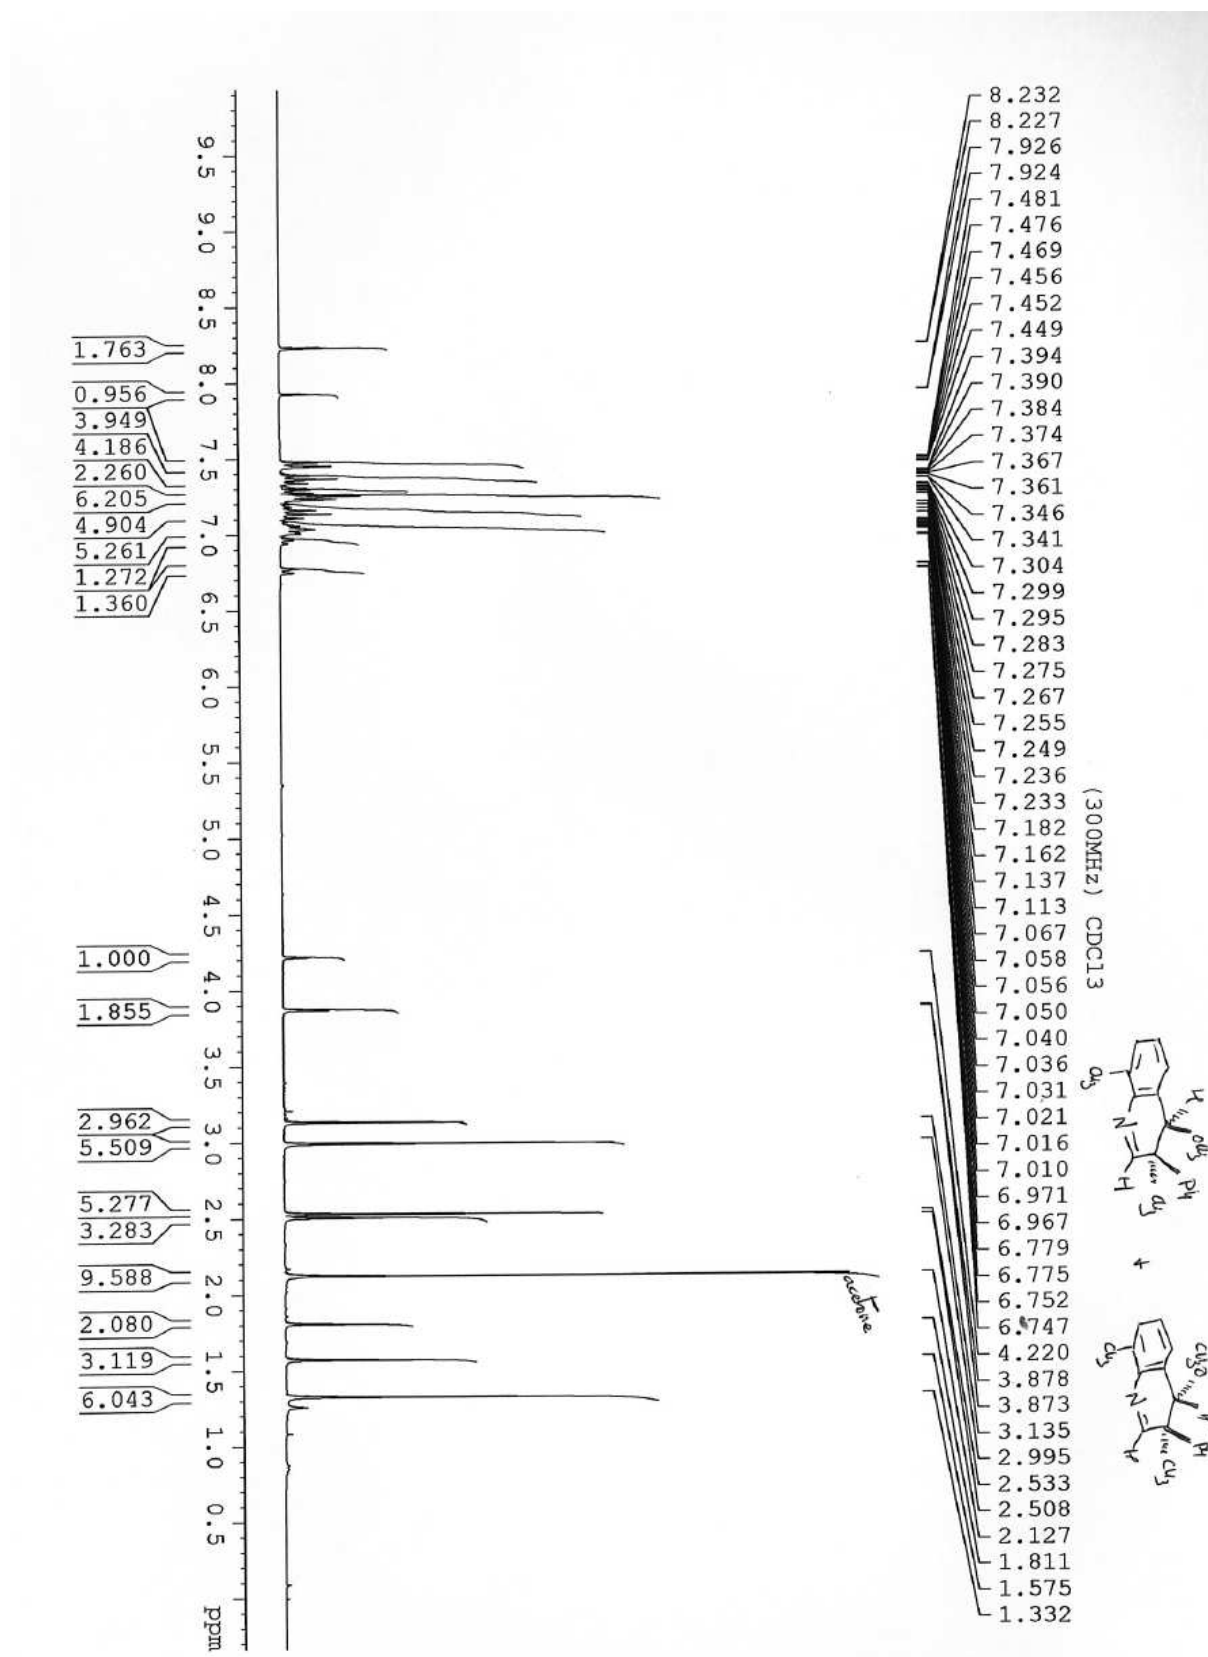

$^{13}\text{C}$  NMR of *cis*-**34f** + *trans*-**34f**

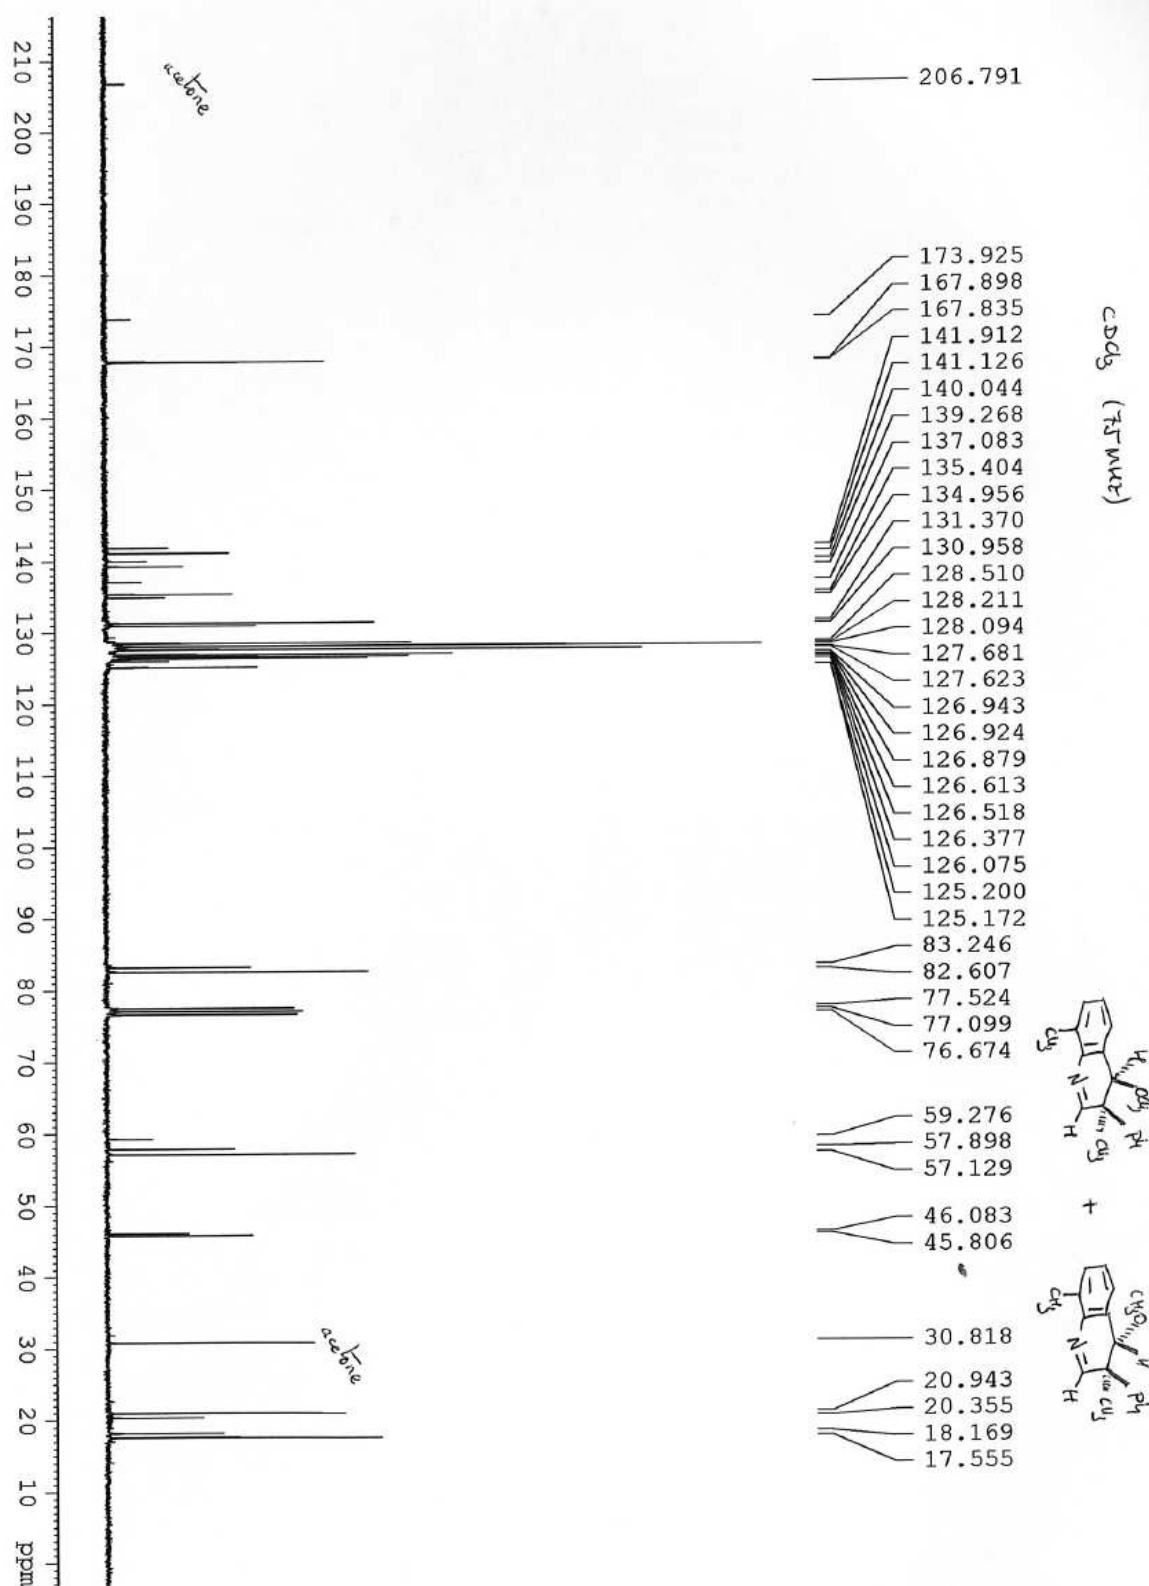

<sup>1</sup>H NMR 37

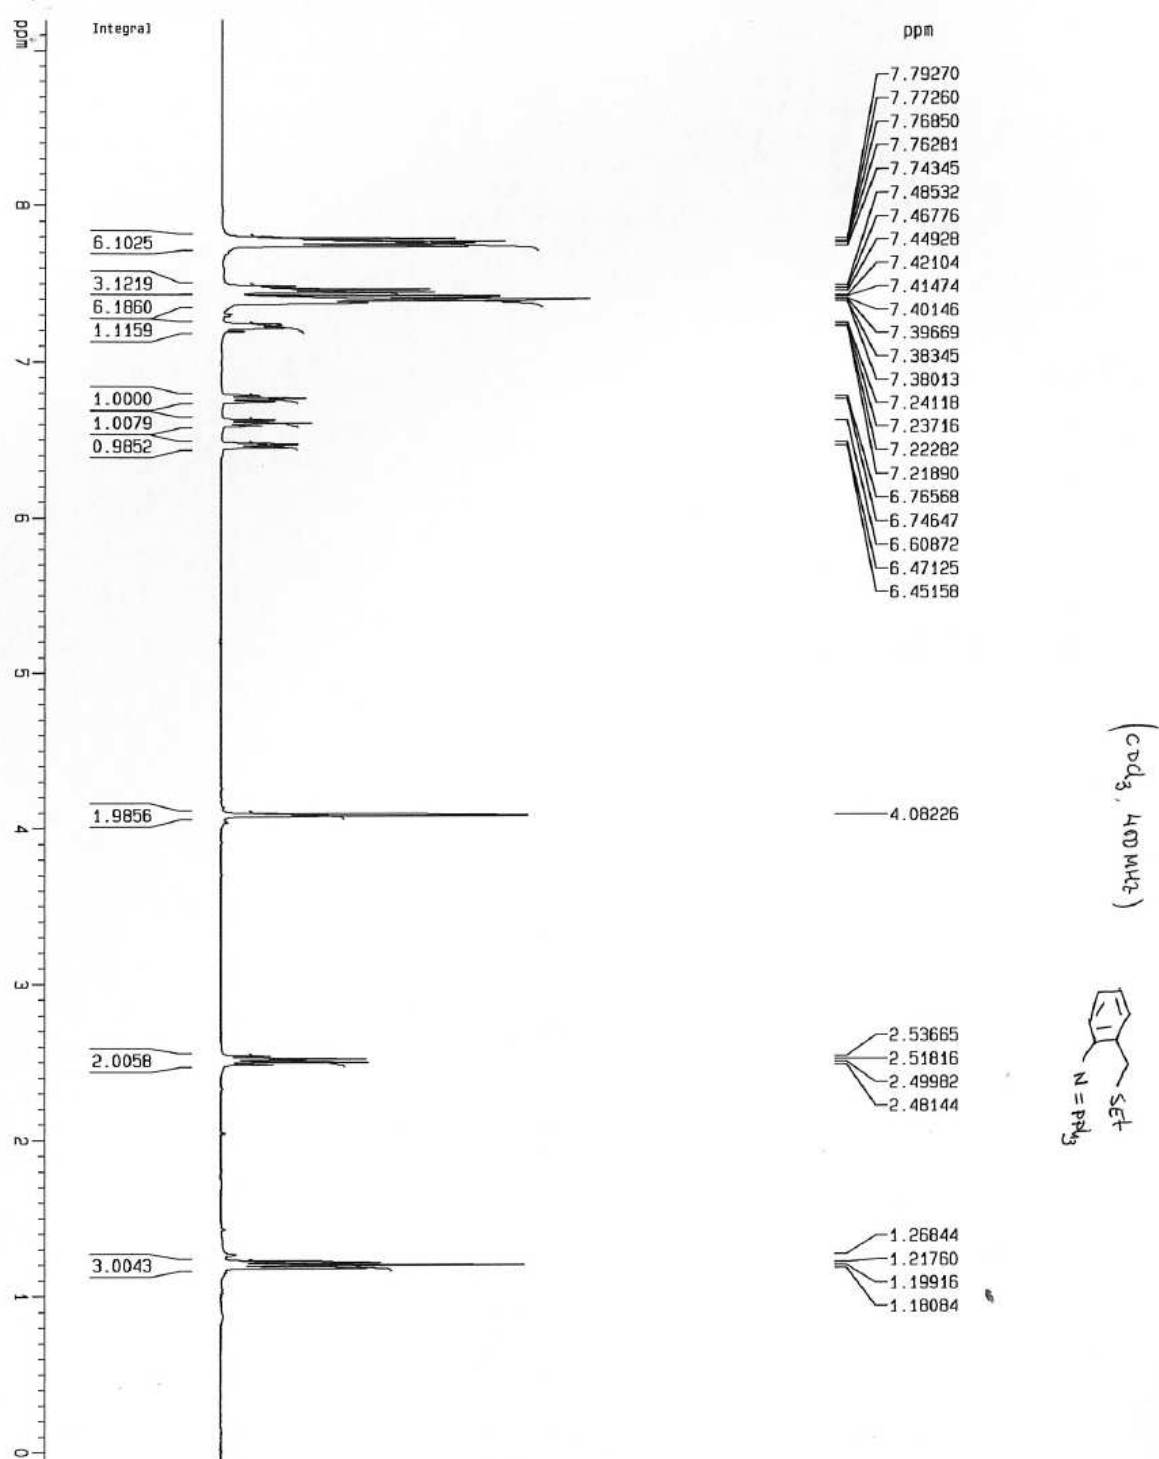

<sup>13</sup>C NMR 37

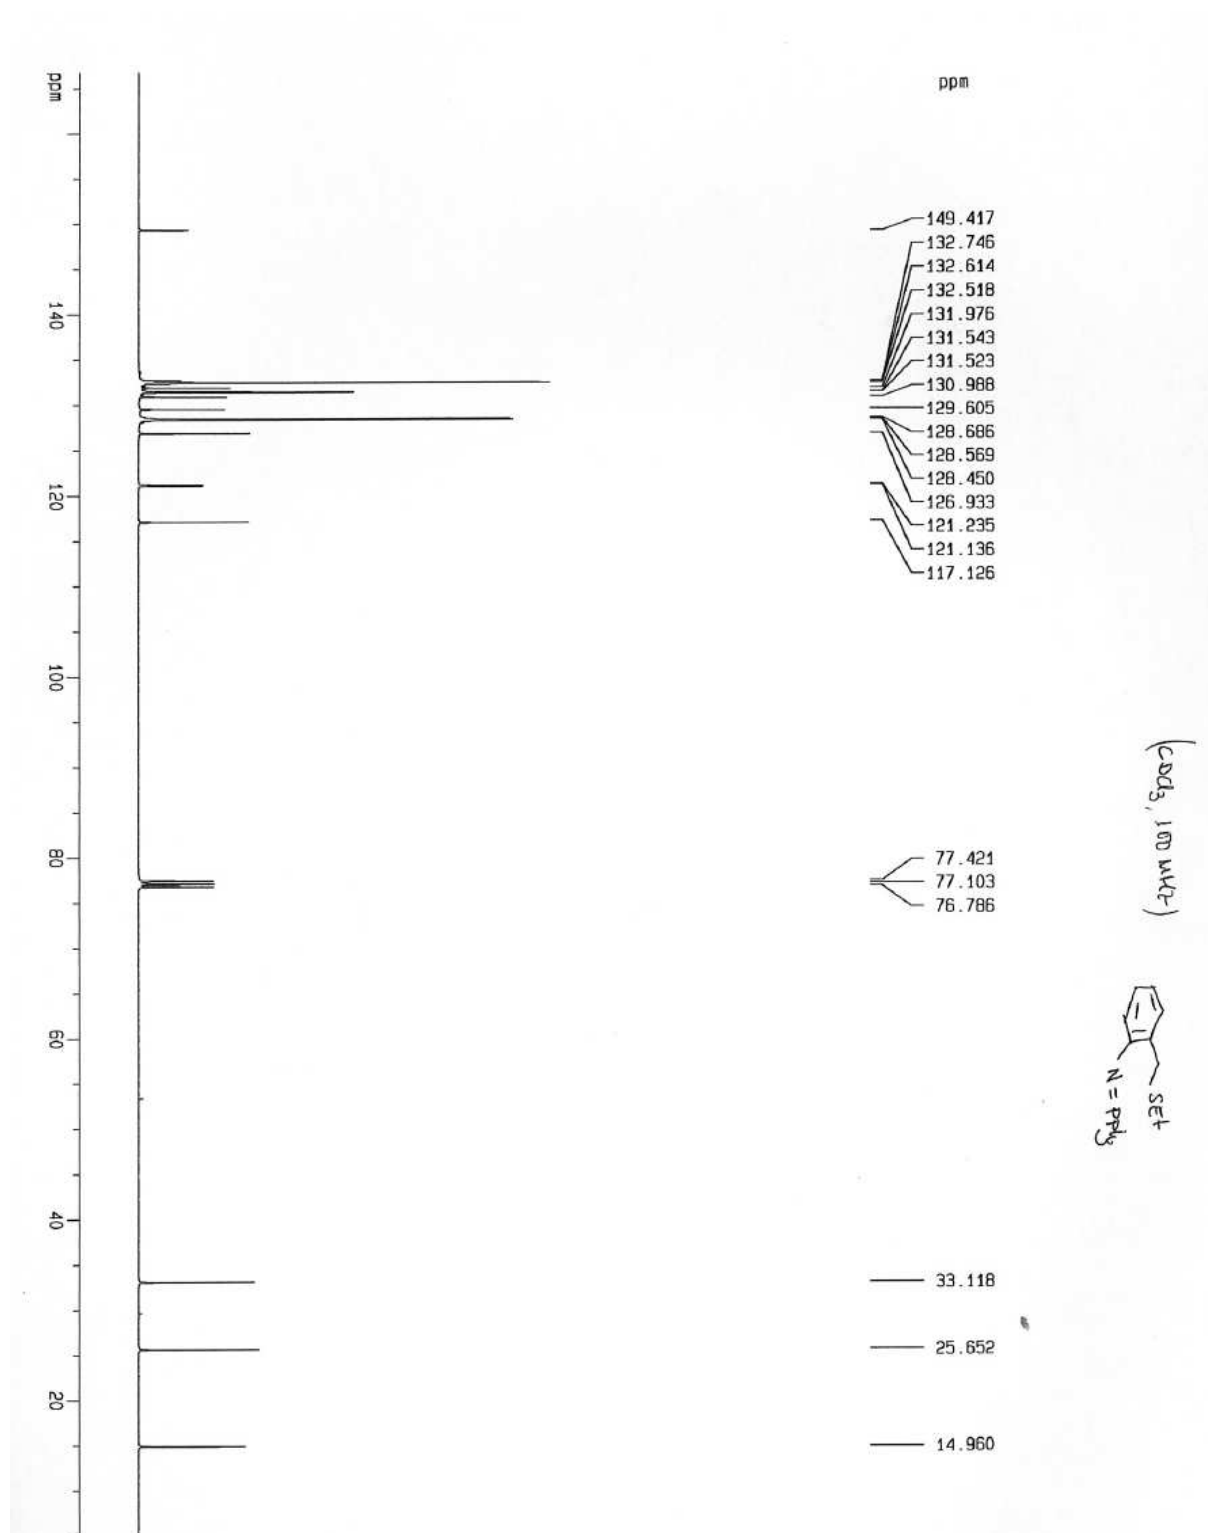

<sup>31</sup>P NMR 37

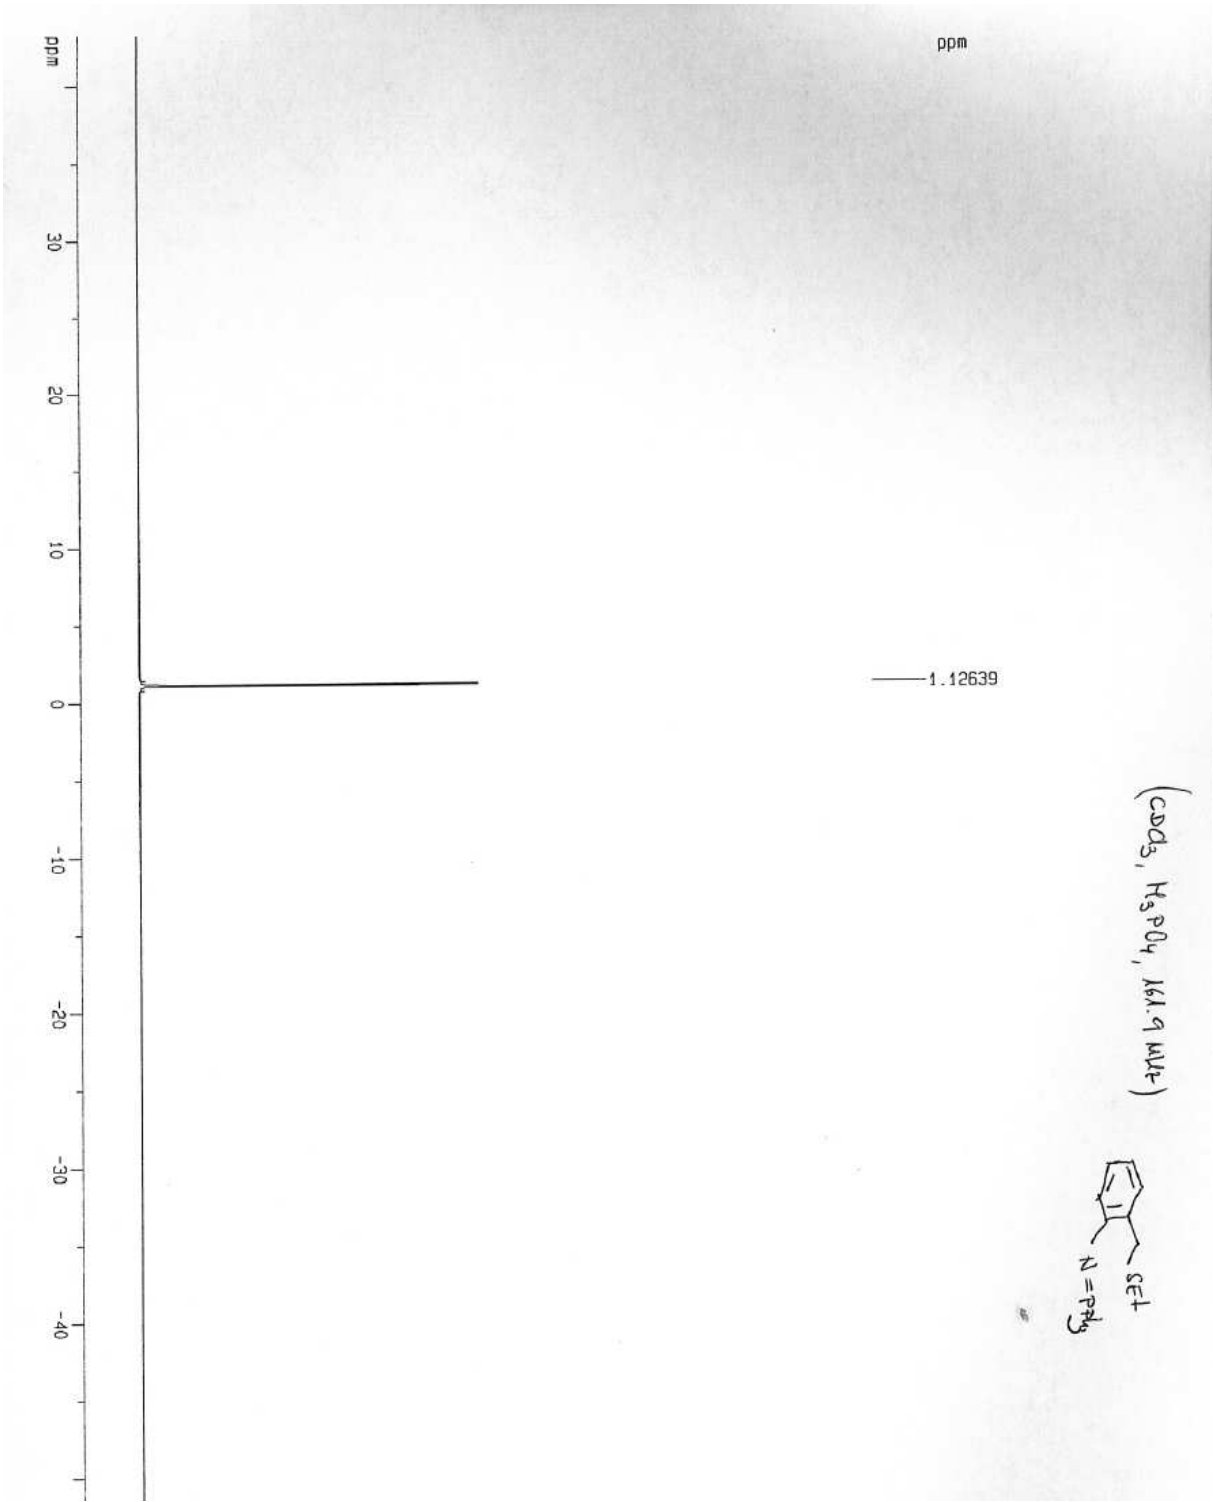

<sup>1</sup>H NMR 39

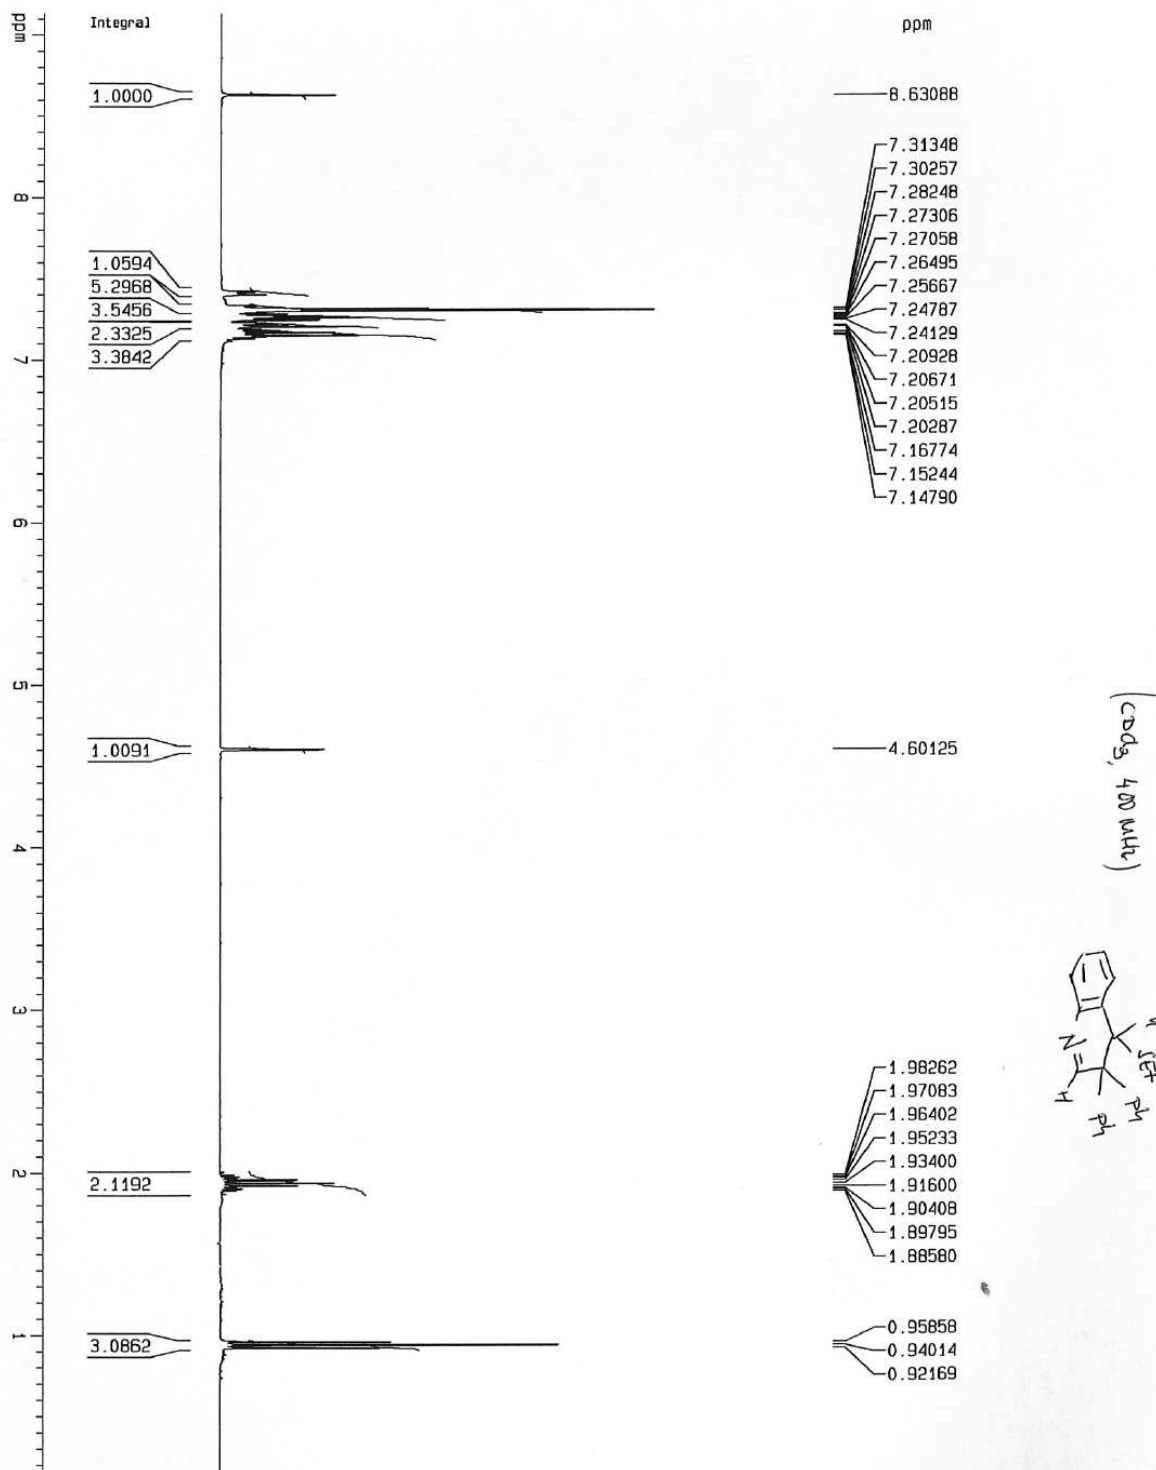

$^{13}\text{C}$  NMR 39

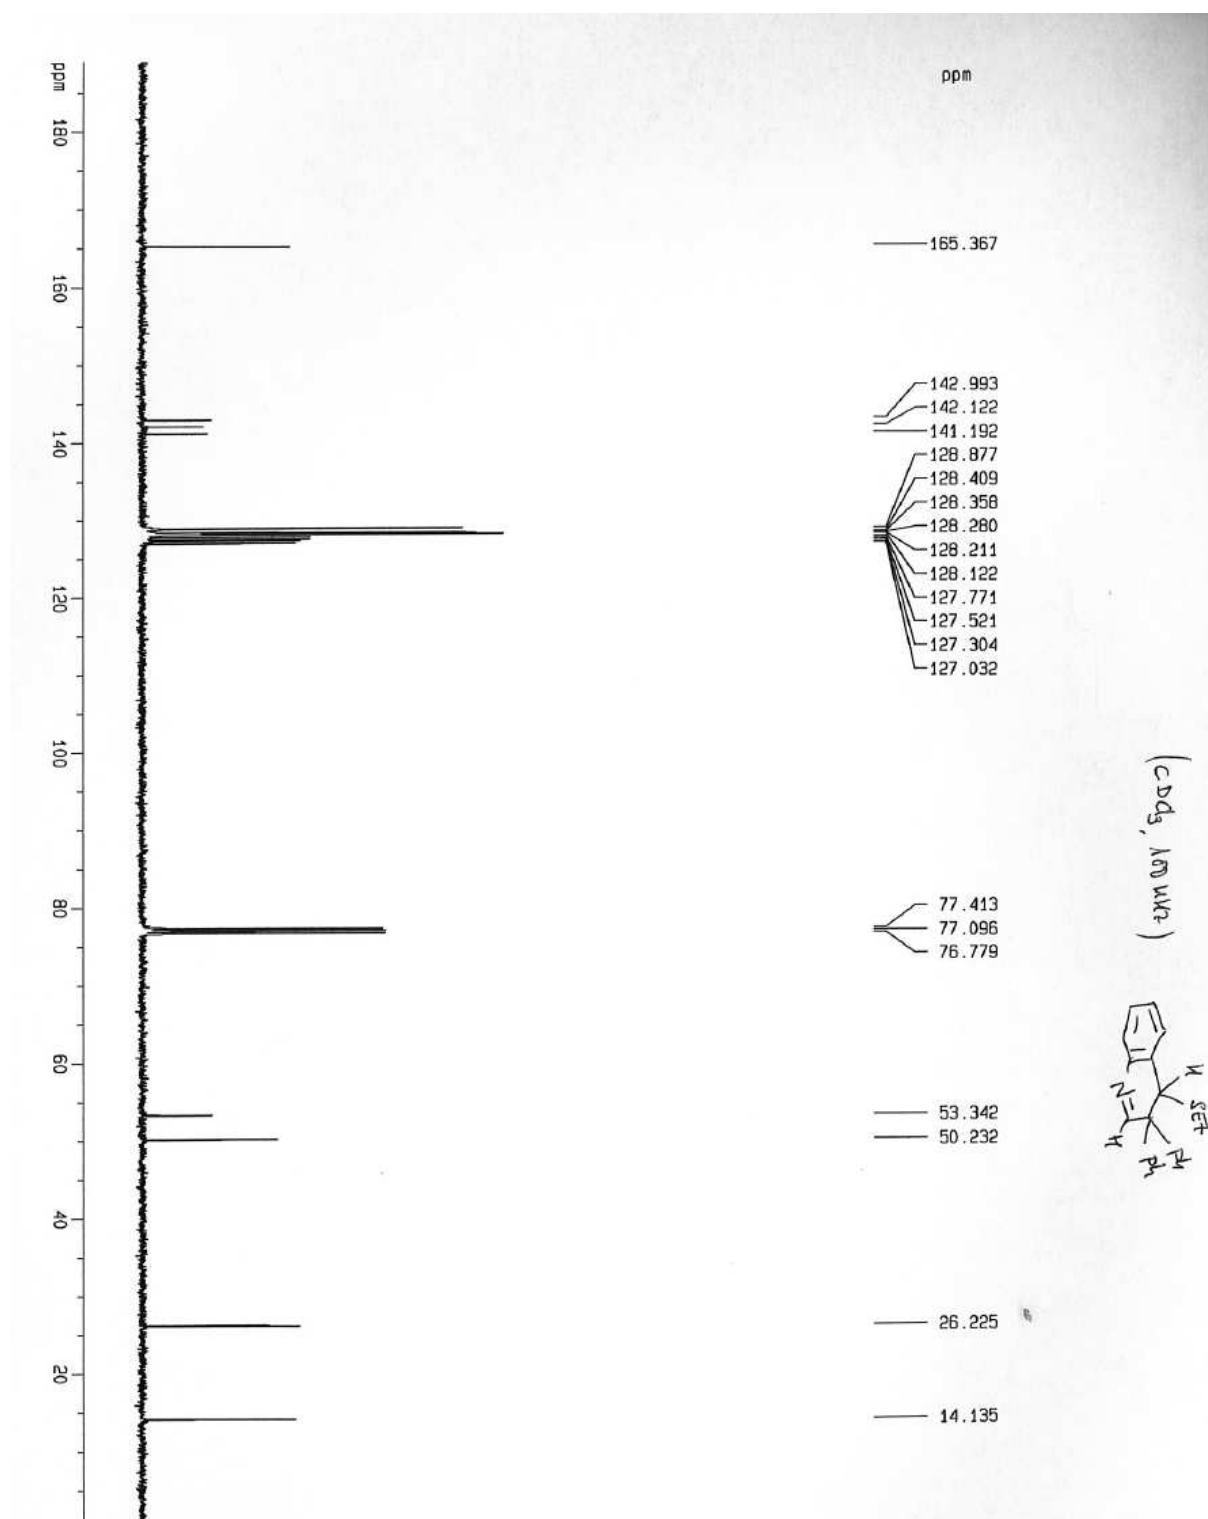

Supplement: c2ob27010b.pdf [file c2ob27010b.pdf]
